# Supplementary material for: Towards Safer Roads: Predicting the Severity of Traffic Accident in Montreal Using Machine Learning
Source: Preprints.org preprint supplement (doi:10.20944/preprints202405.0816.v2), 2024-06-13
Supplement: Supplementary file 1 [file supplementary]

NO_SEQ_COLL	JR_SEMN_ACCDN	DT_ACCDN	CD_MUNCP	NO_CIVIQ_ACCDN	SFX_NO_CIVIQ_ACCDN	BORNE_KM_ACCDN	RUE_ACCDN	TP_REPRR_ACCDN	ACCDN_PRES_DE	NB_METRE_DIST_ACCD	CD_GENRE_ACCDN	CD_SIT_PRTCE_ACCDN	CD_ETAT_SURFC	CD_ECLRM	CD_ENVRN_ACCDN	NO_ROUTE	CD_CATEG_ROUTE	CD_ETAT_CHASS	CD_ASPCT_ROUTE	CD_LOCLN_ACCDN	CD_POSI_ACCDN	CD_CONFG_ROUTE	CD_ZON_TRAVX_ROUTR	CD_PNT_CDRNL_ROUTE	CD_PNT_CDRNL_REPRR	CD_COND_METEO	NB_VEH_IMPLIQUES_ACCDN	NB_MORTS	NB_BLESSES_GRAVES	NB_BLESSES_LEGERS	HEURE_ACCDN	AN	NB_VICTIMES_TOTAL	GRAVITE	REG_ADM	MRC	nb_automobile_camion_leger	nb_camionLourd_tractRoutier	nb_outil_equipement	nb_tous_autobus_minibus	nb_bicyclette	nb_cyclomoteur	nb_motocyclette	nb_taxi	nb_urgence	nb_motoneige	nb_VHR	nb_autres_types	nb_veh_non_precise
SPVM _ 2012 _ 1	ME	2012/02/01	66102	3501			ST CHARLES	2	STAT		31		16	1	1		21		11	33		4				11	2	0	0	0	Non précisé	2012	0	Dommages matériels inférieurs au seuil de rapportage	Montréal(06)	Montréal (66 )	1	0	0	0	0	0	0	0	0	0	0	0	1
SPVM _ 2012 _ 10	MA	2012/01/03	66023				TERR VILLE DE MTL				31		11													11	2	0	0	0	Non précisé	2012	0	Dommages matériels seulement	Montréal(06)	Montréal (66 )	1	0	0	0	0	0	0	0	0	0	0	0	1
SPVM _ 2012 _ 100	VE	2012/02/24	66023				JACQUES BIZARD	1	CHERRIER		31		11	3	3		13		21	32		1			E	11	2	0	0	0	02:00:00-02:59:00	2012	0	Dommages matériels inférieurs au seuil de rapportage	Montréal(06)	Montréal (66 )	2	0	0	0	0	0	0	0	0	0	0	0	0
SPVM _ 2012 _ 1000	JE	2012/10/11	66142	11800			BD SALABERRY				31		11	1	3		21		11	40		2				11	2	0	0	0	15:00:00-15:59:00	2012	0	Dommages matériels seulement	Montréal(06)	Montréal (66 )	2	0	0	0	0	0	0	0	0	0	0	0	0
SPVM _ 2012 _ 10000	DI	2012/04/22	66023	38			PL DU COMMERCE				31		12	1	3		21		11	40						12	2	0	0	0	15:00:00-15:59:00	2012	0	Dommages matériels inférieurs au seuil de rapportage	Montréal(06)	Montréal (66 )	1	0	0	0	0	0	0	0	0	0	0	0	1
SPVM _ 2012 _ 10001	DI	2012/04/22	66023	3735			WELLINGTON	1	REGINA	50	33		12	3	3		14	1	11	34	6	2			O	14	2	0	0	1	21:00:00-21:59:00	2012	1	Léger	Montréal(06)	Montréal (66 )	1	0	0	0	1	0	0	0	0	0	0	0	0
SPVM _ 2012 _ 10002	ME	2012/04/25	66023	262			COROT				31																2	0	0	0	00:00:00-00:59:00	2012	0	Dommages matériels inférieurs au seuil de rapportage	Montréal(06)	Montréal (66 )	1	0	0	0	0	0	0	0	0	0	0	0	1
SPVM _ 2012 _ 10003	JE	2012/04/26	66023	876			1RE AV				31		11	1	2		14		11	34		1				11	2	0	0	0	07:00:00-07:59:00	2012	0	Dommages matériels inférieurs au seuil de rapportage	Montréal(06)	Montréal (66 )	1	0	0	0	0	0	0	0	0	0	0	0	1
SPVM _ 2012 _ 10004	JE	2012/04/26	66023				OSBORNE	1	BEURLING		31		11	1	2		13	1	11	32	6				S	12	2	0	0	0	15:00:00-15:59:00	2012	0	Dommages matériels seulement	Montréal(06)	Montréal (66 )	2	0	0	0	0	0	0	0	0	0	0	0	0
SPVM _ 2012 _ 10005	LU	2012/04/30	66023				GERTRUDE	2	DE L EGLISE	20			11	3	2		14		11	34		1			E	11	2	0	0	0	Non précisé	2012	0	Dommages matériels inférieurs au seuil de rapportage	Montréal(06)	Montréal (66 )	1	0	0	0	0	0	0	0	0	0	0	0	1
SPVM _ 2012 _ 10006	LU	2012/04/30	66023								31		11	1	3		13		11	34		2				11	2	0	0	0	17:00:00-17:59:00	2012	0	Dommages matériels inférieurs au seuil de rapportage	Montréal(06)	Montréal (66 )	2	0	0	0	0	0	0	0	0	0	0	0	0
SPVM _ 2012 _ 10007	LU	2012/04/30	66023	3458			JOSEPH VERDUN	1		15			12	1	2		14		11	33		2			E	14	2	0	0	0	Non précisé	2012	0	Dommages matériels inférieurs au seuil de rapportage	Montréal(06)	Montréal (66 )	1	0	0	0	0	0	0	0	0	0	0	0	1
SPVM _ 2012 _ 10008	MA	2012/05/01	66023				WILLIBRORD	1	WELLINGTON	10	31		12	3	3		14		11	33		1			S	14	2	0	0	0	17:00:00-17:59:00	2012	0	Dommages matériels inférieurs au seuil de rapportage	Montréal(06)	Montréal (66 )	1	0	0	0	0	0	0	0	0	0	0	0	1
SPVM _ 2012 _ 10009	VE	2012/05/04	66023	3940			LANOUETTE						12	2	2		14		11	34		1				12	2	0	0	0	Non précisé	2012	0	Dommages matériels inférieurs au seuil de rapportage	Montréal(06)	Montréal (66 )	1	0	0	0	0	0	0	0	0	0	0	0	1
SPVM _ 2012 _ 1001	VE	2012/10/12	66142				DES SOURCES	1	ROGER PILON		31		11	1	3		13		11	32		3				12	2	0	0	0	12:00:00-12:59:00	2012	0	Dommages matériels seulement	Montréal(06)	Montréal (66 )	2	0	0	0	0	0	0	0	0	0	0	0	0
SPVM _ 2012 _ 10010	VE	2012/05/04	66023	3206			JOSEPH						11	3	2		14		11	34		2				11	2	0	0	0	Non précisé	2012	0	Dommages matériels inférieurs au seuil de rapportage	Montréal(06)	Montréal (66 )	1	0	0	0	0	0	0	0	0	0	0	0	1
SPVM _ 2012 _ 10011	SA	2012/05/05	66023				DE L EGLISE	1	WELLINGTON		31		11	3	3		13	1	11	32	6	1				11	2	0	0	0	00:00:00-00:59:00	2012	0	Dommages matériels seulement	Montréal(06)	Montréal (66 )	1	0	0	0	0	0	0	1	0	0	0	0	0
SPVM _ 2012 _ 10012	DI	2012/05/06	66023	777			6E AV	1	BANNANTYNE	150	31		11	3	2		14		11	34		1			S	11	2	0	0	0	10:00:00-10:59:00	2012	0	Dommages matériels inférieurs au seuil de rapportage	Montréal(06)	Montréal (66 )	2	0	0	0	0	0	0	0	0	0	0	0	0
SPVM _ 2012 _ 10013	DI	2012/05/06	66023						5144 BANNANTYNE				11	1	3		13		11	32		2				11	2	0	0	0	Non précisé	2012	0	Dommages matériels inférieurs au seuil de rapportage	Montréal(06)	Montréal (66 )	1	0	0	0	0	0	0	0	0	0	0	0	1
SPVM _ 2012 _ 10014	LU	2012/05/07	66023				WILLIBRORD	1	WELLINGTON		31		11	1	3		13		11	32		1				11	2	0	0	0	11:00:00-11:59:00	2012	0	Dommages matériels seulement	Montréal(06)	Montréal (66 )	2	0	0	0	0	0	0	0	0	0	0	0	0
SPVM _ 2012 _ 10015	LU	2012/05/07	66023					1	DE L EGLISE ET COOL	20	31		11	1	2		14		11	33		1			E	11	2	0	0	0	16:00:00-16:59:00	2012	0	Dommages matériels seulement	Montréal(06)	Montréal (66 )	2	0	0	0	0	0	0	0	0	0	0	0	0
SPVM _ 2012 _ 10016	LU	2012/05/07	66023					1	GILBERTE DUBE ET GAETAN LABERGE	30	32		11	1	3		14	1	11	32	6	2			N	11	2	0	0	0	15:00:00-15:59:00	2012	0	Dommages matériels inférieurs au seuil de rapportage	Montréal(06)	Montréal (66 )	1	0	0	0	0	0	0	0	0	0	0	0	1
SPVM _ 2012 _ 10017	LU	2012/05/07	66023	38			PL DU COMMERCE	1	LEVERT	500	31		11	2	3		21		11	40		2			E	11	2	0	0	0	Non précisé	2012	0	Dommages matériels seulement	Montréal(06)	Montréal (66 )	1	0	0	0	0	0	0	0	0	0	0	0	1
SPVM _ 2012 _ 10018	ME	2012/05/09	66023				WELLINGTON	1	RHEAUME		32		11	1	2		13	1	11	32	6	4				11	1	0	0	1	17:00:00-17:59:00	2012	1	Léger	Montréal(06)	Montréal (66 )	1	0	0	0	0	0	0	0	0	0	0	0	0
SPVM _ 2012 _ 10019	MA	2012/05/08	66023	100			LAFLEUR																				2	0	0	0	18:00:00-18:59:00	2012	0	Dommages matériels inférieurs au seuil de rapportage	Montréal(06)	Montréal (66 )	1	0	0	0	0	0	0	0	0	0	0	0	1
SPVM _ 2012 _ 1002	VE	2012/10/12	66142	3490			DES SOURCES		STAT		31		11	1	3		21		11	40						11	2	0	0	0	16:00:00-16:59:00	2012	0	Dommages matériels inférieurs au seuil de rapportage	Montréal(06)	Montréal (66 )	1	0	0	0	0	0	0	0	0	0	0	0	1
SPVM _ 2012 _ 10020	ME	2012/05/09	66023				HICKSON	1	JOSEPH		31		11	3	2		14		11	32		1				12	4	0	0	0	20:00:00-20:59:00	2012	0	Dommages matériels seulement	Montréal(06)	Montréal (66 )	2	0	0	0	0	0	0	0	2	0	0	0	0
SPVM _ 2012 _ 10021	ME	2012/05/09	66023	3515			BD LASALLE				31		99	1	3		13		11	99		3				11	2	0	0	0	Non précisé	2012	0	Dommages matériels inférieurs au seuil de rapportage	Montréal(06)	Montréal (66 )	1	0	0	0	0	0	0	0	0	0	0	0	1
SPVM _ 2012 _ 10022	VE	2012/05/11	66023				DE L EGLISE	1	EVANGELINE	10	33		11	1	3		14	1	13	33	5	1			N	11	2	0	0	1	17:00:00-17:59:00	2012	1	Léger	Montréal(06)	Montréal (66 )	1	0	0	0	1	0	0	0	0	0	0	0	0
SPVM _ 2012 _ 10023	VE	2012/05/11	66023	3864			ARR NEWMARCH	2	ARR 3865 CLAUDE VERDUN		52		11	1	2		16		11	99		2				11	1	0	0	0	17:00:00-17:59:00	2012	0	Dommages matériels seulement	Montréal(06)	Montréal (66 )	1	0	0	0	0	0	0	0	0	0	0	0	0
SPVM _ 2012 _ 10024	VE	2012/05/11	66023				GAETAN LABERGE	1	GILBERTE DUBE	10	59		11	1	3		15		11	33		2			O	11	1	0	0	0	19:00:00-19:59:00	2012	0	Dommages matériels inférieurs au seuil de rapportage	Montréal(06)	Montréal (66 )	0	0	0	0	0	0	0	0	1	0	0	0	0
SPVM _ 2012 _ 10025	SA	2012/05/12	66023					1	ETHEL	3	31		11	2	3		13	1	11	33		1			N	11	2	0	0	2	20:00:00-20:59:00	2012	2	Léger	Montréal(06)	Montréal (66 )	1	0	0	0	0	0	0	1	0	0	0	0	0
SPVM _ 2012 _ 10026	LU	2012/05/14	66023	1170			DE L EGLISE		CHAMPLAIN	1	31		11	3	3		21		11	99		2				11	2	0	0	0	21:00:00-21:59:00	2012	0	Dommages matériels inférieurs au seuil de rapportage	Montréal(06)	Montréal (66 )	1	1	0	0	0	0	0	0	0	0	0	0	0
SPVM _ 2012 _ 10027	ME	2012/05/09	66023	200			DES SOMMETS				31		11	1	2		21		11	99		9				11	2	0	0	0	12:00:00-12:59:00	2012	0	Dommages matériels inférieurs au seuil de rapportage	Montréal(06)	Montréal (66 )	1	0	0	0	0	0	0	0	0	0	0	0	1
SPVM _ 2012 _ 10028	VE	2012/05/11	66023	3500			WELLINGTON				31		11	1	2		21		11	99		9				11	2	0	0	0	18:00:00-18:59:00	2012	0	Dommages matériels inférieurs au seuil de rapportage	Montréal(06)	Montréal (66 )	1	0	0	0	0	0	0	0	0	0	0	0	1
SPVM _ 2012 _ 10029	LU	2012/05/14	66023	6100			CHAMPLAIN				31		11	1	1		21		11	99		9				11	2	0	0	0	15:00:00-15:59:00	2012	0	Dommages matériels inférieurs au seuil de rapportage	Montréal(06)	Montréal (66 )	2	0	0	0	0	0	0	0	0	0	0	0	0
SPVM _ 2012 _ 1003	SA	2012/10/13	66142				ST JEAN BD	1	WESTMINSTER		31		11	3	3		13	1	11	32	6	5			S	11	2	0	0	1	21:00:00-21:59:00	2012	1	Léger	Montréal(06)	Montréal (66 )	2	0	0	0	0	0	0	0	0	0	0	0	0
SPVM _ 2012 _ 10030	VE	2012/05/18	66023				WOODLAND	2	FACE AU 1189 WOODLAND		31		12		2		14		11	33		2					2	0	0	0	Non précisé	2012	0	Dommages matériels inférieurs au seuil de rapportage	Montréal(06)	Montréal (66 )	1	0	0	0	0	0	0	0	0	0	0	0	1
SPVM _ 2012 _ 10031	VE	2012/05/18	66023								31		11	1	2		14		11	33		1				11	2	0	0	0	11:00:00-11:59:00	2012	0	Dommages matériels inférieurs au seuil de rapportage	Montréal(06)	Montréal (66 )	2	0	0	0	0	0	0	0	0	0	0	0	0
SPVM _ 2012 _ 10032	VE	2012/05/18	66023	3371			WELLINGTON FACE				31		11	1	3		13	1	11	34	6	3				11	2	0	0	3	16:00:00-16:59:00	2012	3	Léger	Montréal(06)	Montréal (66 )	2	0	0	0	0	0	0	0	0	0	0	0	0
SPVM _ 2012 _ 10033	DI	2012/05/13	66023	811			RIELLE				31		11	3	2		21		11	99		9				11	2	0	0	0	03:00:00-03:59:00	2012	0	Dommages matériels inférieurs au seuil de rapportage	Montréal(06)	Montréal (66 )	2	0	0	0	0	0	0	0	0	0	0	0	0
SPVM _ 2012 _ 10034	VE	2012/05/18	66023	3000			WELLINGTON						11	1	3		21		11	40		9				11	2	0	0	0	08:00:00-08:59:00	2012	0	Dommages matériels inférieurs au seuil de rapportage	Montréal(06)	Montréal (66 )	1	0	0	0	0	0	0	0	0	0	0	0	1
SPVM _ 2012 _ 10035	SA	2012/05/19	66023	4436			WELLINGTON				31		11	1	3				11							11	2	0	0	0	Non précisé	2012	0	Dommages matériels inférieurs au seuil de rapportage	Montréal(06)	Montréal (66 )	2	0	0	0	0	0	0	0	0	0	0	0	0
SPVM _ 2012 _ 10036	SA	2012/05/19	66023	42			PL DU COMMERCE						11	1	3		21		11	99		9				11	2	0	0	0	Non précisé	2012	0	Dommages matériels inférieurs au seuil de rapportage	Montréal(06)	Montréal (66 )	1	0	0	0	0	0	0	0	0	0	0	0	1
SPVM _ 2012 _ 10037	SA	2012/05/19	66023				LASALLE	1	5E AV				11	3	2		14		11	99		2				11	2	0	0	0	19:00:00-19:59:00	2012	0	Dommages matériels inférieurs au seuil de rapportage	Montréal(06)	Montréal (66 )	1	0	0	0	0	0	0	0	0	0	0	0	1
SPVM _ 2012 _ 10038	DI	2012/05/20	66023	1325			CRAWFOD				31		11	1	2		14		11	33		2				12	2	0	0	0	Non précisé	2012	0	Dommages matériels inférieurs au seuil de rapportage	Montréal(06)	Montréal (66 )	1	0	0	0	0	0	0	0	0	0	0	0	1
SPVM _ 2012 _ 10039	DI	2012/05/20	66023	278			ELGAR	1	BD ISLE DES SOEURS		31		11	1	3		21		11	40		4				11	2	0	0	0	18:00:00-18:59:00	2012	0	Dommages matériels seulement	Montréal(06)	Montréal (66 )	1	0	0	0	0	0	0	0	0	0	0	0	1
SPVM _ 2012 _ 1004	DI	2012/10/14	66142	364			MONET				31		12	3	2		14		11	33		2				12	2	0	0	0	22:00:00-22:59:00	2012	0	Dommages matériels inférieurs au seuil de rapportage	Montréal(06)	Montréal (66 )	2	0	0	0	0	0	0	0	0	0	0	0	0
SPVM _ 2012 _ 10040	JE	2012/05/24	66023	702			DESMARCHAIS	1	VERDUN		31		11	1	2		14		11	34		1				11	3	0	0	0	10:00:00-10:59:00	2012	0	Dommages matériels seulement	Montréal(06)	Montréal (66 )	2	0	0	0	0	0	0	0	0	0	0	0	1
SPVM _ 2012 _ 10041	JE	2012/05/24	66023				CHAMPLAIN	1	STEPHENS	10	31		11	1	2		14	1	11	33	6	2			E	11	3	0	0	2	19:00:00-19:59:00	2012	2	Léger	Montréal(06)	Montréal (66 )	3	0	0	0	0	0	0	0	0	0	0	0	0
SPVM _ 2012 _ 10042	VE	2012/05/25	66023				CHAMPLAIN	1	2E AV		33		11	1	2		14	1	11	32	6	1				11	2	0	0	0	14:00:00-14:59:00	2012	0	Dommages matériels inférieurs au seuil de rapportage	Montréal(06)	Montréal (66 )	1	0	0	0	1	0	0	0	0	0	0	0	0
SPVM _ 2012 _ 10043	VE	2012/05/25	66023				BERLIOZ	1	TERRY FOX		31		11	1	2		14		11	32		2				11	2	0	0	0	14:00:00-14:59:00	2012	0	Dommages matériels seulement	Montréal(06)	Montréal (66 )	2	0	0	0	0	0	0	0	0	0	0	0	0
SPVM _ 2012 _ 10044	DI	2012/05/27	66023				JOSEPH	1	HENRI DUHAMEL		31		11	1	2		14	2	11	32	6	2	2			11	2	0	1	0	14:00:00-14:59:00	2012	1	Grave	Montréal(06)	Montréal (66 )	2	0	0	0	0	0	0	0	0	0	0	0	0
SPVM _ 2012 _ 10045	DI	2012/05/27	66023	220			BERLIOZ				31		11	1	2		14		11	34		2				11	2	0	0	0	09:00:00-09:59:00	2012	0	Dommages matériels inférieurs au seuil de rapportage	Montréal(06)	Montréal (66 )	1	0	0	0	0	0	0	0	0	0	0	0	1
SPVM _ 2012 _ 10046	DI	2012/05/27	66023				BEURLING	1	MANNING		31		12	2	2		14		11	32		2				14	2	0	0	0	18:00:00-18:59:00	2012	0	Dommages matériels seulement	Montréal(06)	Montréal (66 )	2	0	0	0	0	0	0	0	0	0	0	0	0
SPVM _ 2012 _ 10047	LU	2012/05/28	66023	4041			WELLINGTON						11	1	3		13		11	34		2				11	2	0	0	0	Non précisé	2012	0	Dommages matériels inférieurs au seuil de rapportage	Montréal(06)	Montréal (66 )	1	0	0	0	0	0	0	0	0	0	0	0	1
SPVM _ 2012 _ 10048	MA	2012/05/29	66023	4000			LASALLE ARR HOP	1	DE L EGLISE	25	32		12	2	3		13	1	11	33	6	5			E	14	1	0	0	1	06:00:00-06:59:00	2012	1	Léger	Montréal(06)	Montréal (66 )	1	0	0	0	0	0	0	0	0	0	0	0	0
SPVM _ 2012 _ 10049	MA	2012/05/29	66023	3380			GERTRUDE				31		11	1	2		14		11	34		1				11	2	0	0	0	13:00:00-13:59:00	2012	0	Dommages matériels seulement	Montréal(06)	Montréal (66 )	1	1	0	0	0	0	0	0	0	0	0	0	0
SPVM _ 2012 _ 1005	ME	2012/10/17	66142	3339			SOURCES BD				31			1	9		21		11	40		9					2	0	0	0	13:00:00-13:59:00	2012	0	Dommages matériels inférieurs au seuil de rapportage	Montréal(06)	Montréal (66 )	1	0	0	0	0	0	0	0	0	0	0	0	1
SPVM _ 2012 _ 10050	JE	2012/05/24	66023				TERR VILLE DE MTL				31																2	0	0	0	11:00:00-11:59:00	2012	0	Dommages matériels inférieurs au seuil de rapportage	Montréal(06)	Montréal (66 )	1	0	0	0	0	0	0	0	0	0	0	0	1
SPVM _ 2012 _ 10051	ME	2012/05/30	66023				WELLINGTON	1	ARGYLE		99		11	1	3		13	1	11	32	6	2			S	11	1	0	0	1	10:00:00-10:59:00	2012	1	Léger	Montréal(06)	Montréal (66 )	0	0	0	1	0	0	0	0	0	0	0	0	0
SPVM _ 2012 _ 10052	MA	2012/05/29	66023				PEGUINA ET WELLINGTON						12	3	2		14		11	34		2				12	2	0	0	0	22:00:00-22:59:00	2012	0	Dommages matériels inférieurs au seuil de rapportage	Montréal(06)	Montréal (66 )	1	0	0	0	0	0	0	0	0	0	0	0	1
SPVM _ 2012 _ 10053	MA	2012/05/29	66023	374			DE LA POUDRIERE FACE	1	HENRI DUHAMEL	200	31		11	3	2		14		11	33		1			O	11	2	0	0	0	Non précisé	2012	0	Dommages matériels seulement	Montréal(06)	Montréal (66 )	1	0	0	0	0	0	0	0	0	0	0	0	1
SPVM _ 2012 _ 10054	JE	2012/05/31	66023	633			STRATHMORE	1	ST JOSEPH	20	31		11	1	2		14		11	34		2			S	11	2	0	0	0	12:00:00-12:59:00	2012	0	Dommages matériels seulement	Montréal(06)	Montréal (66 )	2	0	0	0	0	0	0	0	0	0	0	0	0
SPVM _ 2012 _ 10055	JE	2012/05/31	66023				REGINA	1	EVELYNE	3	31		11	1	1		14	1	11	32	6	2			N	11	2	0	0	1	16:00:00-16:59:00	2012	1	Léger	Montréal(06)	Montréal (66 )	2	0	0	0	0	0	0	0	0	0	0	0	0
SPVM _ 2012 _ 10056	JE	2012/05/24	66023	4041			WELLINGTON						11	1	3		13		11	34		2				11	2	0	0	0	Non précisé	2012	0	Dommages matériels inférieurs au seuil de rapportage	Montréal(06)	Montréal (66 )	1	0	0	0	0	0	0	0	0	0	0	0	1
SPVM _ 2012 _ 10057	ME	2012/05/30	66023	3201			VERDUN	1	HENRI DUHAMEL	150	31			2	2		14		11	34		2			O	11	2	0	0	0	19:00:00-19:59:00	2012	0	Dommages matériels inférieurs au seuil de rapportage	Montréal(06)	Montréal (66 )	1	0	0	0	0	0	1	0	0	0	0	0	0
SPVM _ 2012 _ 10058	JE	2012/06/07	66023	189			2IEME AV PRES DE						11		2		14		11	34		1			S	11	2	0	0	0	Non précisé	2012	0	Dommages matériels inférieurs au seuil de rapportage	Montréal(06)	Montréal (66 )	1	0	0	0	0	0	0	0	0	0	0	0	1
SPVM _ 2012 _ 10059	LU	2012/06/04	66023				LEVERT	1	PL DU COMMERCE		31		11		3		13		11	33		2				11	2	0	0	0	18:00:00-18:59:00	2012	0	Dommages matériels seulement	Montréal(06)	Montréal (66 )	2	0	0	0	0	0	0	0	0	0	0	0	0
SPVM _ 2012 _ 1006	VE	2012/10/19	66142				CHURCHILL	1	BD DES SOURCES		31		12	1	3		13		11	32						14	2	0	0	0	12:00:00-12:59:00	2012	0	Dommages matériels inférieurs au seuil de rapportage	Montréal(06)	Montréal (66 )	2	0	0	0	0	0	0	0	0	0	0	0	0
SPVM _ 2012 _ 10060	JE	2012/06/07	66023	196			1RE AV				31		11	3	2		14		11	34		1				11	2	0	0	0	21:00:00-21:59:00	2012	0	Dommages matériels seulement	Montréal(06)	Montréal (66 )	2	0	0	0	0	0	0	0	0	0	0	0	0
SPVM _ 2012 _ 10061	VE	2012/06/08	66023				BANNANTYNE	1	OSBORNE		32		11	1	2		14	1	11	32	6	2				11	1	0	0	1	17:00:00-17:59:00	2012	1	Léger	Montréal(06)	Montréal (66 )	1	0	0	0	0	0	0	0	0	0	0	0	0
SPVM _ 2012 _ 10062	VE	2012/06/08	66023				LASALLE	2	PARC HADLEY		59		11	1	7		29	1	11	99	10	3				11	1	0	0	1	17:00:00-17:59:00	2012	1	Léger	Montréal(06)	Montréal (66 )	1	0	0	0	0	0	0	0	0	0	0	0	0
SPVM _ 2012 _ 10063	VE	2012/06/08	66023				GALT	1	VERDUN		31		11	2	3		13		11	32		1				11	2	0	0	0	20:00:00-20:59:00	2012	0	Dommages matériels seulement	Montréal(06)	Montréal (66 )	2	0	0	0	0	0	0	0	0	0	0	0	0
SPVM _ 2012 _ 10064	SA	2012/06/09	66023	738			4E AV	1	VERDUN	125	31		11	3	2		14		11	34		1			N	11	4	0	0	0	00:00:00-00:59:00	2012	0	Dommages matériels inférieurs au seuil de rapportage	Montréal(06)	Montréal (66 )	4	0	0	0	0	0	0	0	0	0	0	0	0
SPVM _ 2012 _ 10065	SA	2012/06/09	66023				LASALLE	1	EDNA		31		11	3	2		22		11	32		1				11	2	0	0	0	01:00:00-01:59:00	2012	0	Dommages matériels inférieurs au seuil de rapportage	Montréal(06)	Montréal (66 )	1	0	0	0	0	0	0	0	0	0	0	0	1
SPVM _ 2012 _ 10066	SA	2012/06/09	66023	5144			BANNANTYNE				31		11	1	3		21		11	40		9				11	2	0	0	0	11:00:00-11:59:00	2012	0	Dommages matériels inférieurs au seuil de rapportage	Montréal(06)	Montréal (66 )	1	0	0	0	0	0	0	0	0	0	0	0	1
SPVM _ 2012 _ 10067	DI	2012/06/10	66023	4061			WELLINGTON				31		11	1	3		13		11	34		2				11	2	0	0	0	10:00:00-10:59:00	2012	0	Dommages matériels inférieurs au seuil de rapportage	Montréal(06)	Montréal (66 )	1	0	0	0	0	0	0	0	0	0	0	0	1
SPVM _ 2012 _ 10068	DI	2012/06/10	66023	740			DESMARCHAIS	1	VERDUN		31		11	1	2		14		11	32		2				11	2	0	0	0	Non précisé	2012	0	Dommages matériels seulement	Montréal(06)	Montréal (66 )	1	0	0	0	0	0	0	0	0	0	0	0	1
SPVM _ 2012 _ 10069	LU	2012/06/11	66023	658			5E AV	1	VERDUN	100	49		11	3	2		16		11	99		9			N	11	1	0	0	0	00:00:00-00:59:00	2012	0	Dommages matériels inférieurs au seuil de rapportage	Montréal(06)	Montréal (66 )	1	0	0	0	0	0	0	0	0	0	0	0	0
SPVM _ 2012 _ 1007	VE	2012/10/19	66142				HYMAN	1	ANGORA						2		13		11								2	0	0	0	Non précisé	2012	0	Dommages matériels inférieurs au seuil de rapportage	Montréal(06)	Montréal (66 )	1	0	0	0	0	0	0	0	0	0	0	0	1
SPVM _ 2012 _ 10070	LU	2012/06/11	66023	412			GORDON				31		11	1	2		14		11	34		1				11	2	0	0	0	09:00:00-09:59:00	2012	0	Dommages matériels inférieurs au seuil de rapportage	Montréal(06)	Montréal (66 )	2	0	0	0	0	0	0	0	0	0	0	0	0
SPVM _ 2012 _ 10071	JE	2012/06/07	66023	1680			AV CRAWFORD BRIDGE				31		11	1	2		14		11	34					N	11	2	0	0	0	07:00:00-07:59:00	2012	0	Dommages matériels inférieurs au seuil de rapportage	Montréal(06)	Montréal (66 )	1	0	0	0	0	0	0	0	0	0	0	0	1
SPVM _ 2012 _ 10072	JE	2012/05/24	66023	4450			VERDUN				31		11		3		13		11	34		2				11	2	0	0	0	21:00:00-21:59:00	2012	0	Dommages matériels seulement	Montréal(06)	Montréal (66 )	1	1	0	0	0	0	0	0	0	0	0	0	0
SPVM _ 2012 _ 10073	MA	2012/06/12	66023	3000			WELLINGTON				31		11	1	3		13		11	34		3				11	2	0	0	0	09:00:00-09:59:00	2012	0	Dommages matériels seulement	Montréal(06)	Montréal (66 )	1	1	0	0	0	0	0	0	0	0	0	0	0
SPVM _ 2012 _ 10074	LU	2012/06/11	66023	200			6E AV				31		11	1	2		14		11	32		1				11	2	0	0	0	12:00:00-12:59:00	2012	0	Dommages matériels inférieurs au seuil de rapportage	Montréal(06)	Montréal (66 )	1	1	0	0	0	0	0	0	0	0	0	0	0
SPVM _ 2012 _ 10075	LU	2012/06/11	66023	625			4E AV				31		11	1	2		14		11			1				11	2	0	0	0	16:00:00-16:59:00	2012	0	Dommages matériels inférieurs au seuil de rapportage	Montréal(06)	Montréal (66 )	2	0	0	0	0	0	0	0	0	0	0	0	0
SPVM _ 2012 _ 10076	MA	2012/06/12	66023				BD ILE DES SOEURS	1	DU COMMERCE		31		11	1	3		13		21	31		1				11	2	0	0	0	08:00:00-08:59:00	2012	0	Dommages matériels inférieurs au seuil de rapportage	Montréal(06)	Montréal (66 )	1	0	1	0	0	0	0	0	0	0	0	0	0
SPVM _ 2012 _ 10077	SA	2012/06/02	66023				WELLINGTON	1	RIELLE		31		12	1	3		13		11	32		2				14	2	0	0	0	14:00:00-14:59:00	2012	0	Dommages matériels seulement	Montréal(06)	Montréal (66 )	1	0	0	0	0	0	0	0	0	0	0	0	1
SPVM _ 2012 _ 10078	ME	2012/06/13	66023	1060			4E AV RUELLE ARR				31		11	1	2		16		11	99		9				11	2	0	0	0	07:00:00-07:59:00	2012	0	Dommages matériels inférieurs au seuil de rapportage	Montréal(06)	Montréal (66 )	1	0	0	0	0	0	1	0	0	0	0	0	0
SPVM _ 2012 _ 10079	JE	2012/06/14	66023				WELLINGTON	1	GILBERTE DUBE		33		11	1	3		14	1	11	32	5	2				11	2	0	0	1	16:00:00-16:59:00	2012	1	Léger	Montréal(06)	Montréal (66 )	1	0	0	0	1	0	0	0	0	0	0	0	0
SPVM _ 2012 _ 1008	SA	2012/10/20	66142				LAKE		TECUMSEH	5	99		12	3	2		14		11						E	14	1	0	0	0	04:00:00-04:59:00	2012	0	Dommages matériels seulement	Montréal(06)	Montréal (66 )	1	0	0	0	0	0	0	0	0	0	0	0	0
SPVM _ 2012 _ 10080	VE	2012/06/15	66023	5055			BANNANTYNE				31		11	1	2		14		11	32		2			S	11	2	0	0	0	09:00:00-09:59:00	2012	0	Dommages matériels inférieurs au seuil de rapportage	Montréal(06)	Montréal (66 )	2	0	0	0	0	0	0	0	0	0	0	0	0
SPVM _ 2012 _ 10081	VE	2012/06/15	66023				TER5RITOIRE DE MONTREAL				31																2	0	0	0	11:00:00-11:59:00	2012	0	Dommages matériels inférieurs au seuil de rapportage	Montréal(06)	Montréal (66 )	1	0	0	0	0	0	0	0	0	0	0	0	1
SPVM _ 2012 _ 10082	SA	2012/06/16	66023								40		11	1	3		21		11			1				11	1	0	0	0	11:00:00-11:59:00	2012	0	Dommages matériels inférieurs au seuil de rapportage	Montréal(06)	Montréal (66 )	0	1	0	0	0	0	0	0	0	0	0	0	0
SPVM _ 2012 _ 10083	SA	2012/06/16	66023				FACE 6875 BD LASALLE VERDUN	1	STEPHENS	100	31		11	1	7		14		11	34		2			O	11	2	0	0	0	07:00:00-07:59:00	2012	0	Dommages matériels inférieurs au seuil de rapportage	Montréal(06)	Montréal (66 )	1	0	0	0	0	0	0	0	0	0	0	0	1
SPVM _ 2012 _ 10084	LU	2012/06/18	66023	3991			LESAGE	1	DE L EGLISE	100	31		11	1	2		14		11	34		2			E	11	2	0	0	0	12:00:00-12:59:00	2012	0	Dommages matériels seulement	Montréal(06)	Montréal (66 )	2	0	0	0	0	0	0	0	0	0	0	0	0
SPVM _ 2012 _ 10085	LU	2012/06/18	66023	5099			BANNANTYNE	2	DS LA RUELLE	10	31		11	1	3		16		11	33		1			N	11	2	0	0	0	09:00:00-09:59:00	2012	0	Dommages matériels inférieurs au seuil de rapportage	Montréal(06)	Montréal (66 )	1	0	0	0	0	0	0	0	0	0	0	1	0
SPVM _ 2012 _ 10086	DI	2012/04/01	66023	50			BERLIOZ								2		21										2	0	0	0	00:00:00-00:59:00	2012	0	Dommages matériels inférieurs au seuil de rapportage	Montréal(06)	Montréal (66 )	1	0	0	0	0	0	0	0	0	0	0	0	1
SPVM _ 2012 _ 10087	ME	2012/06/20	66023	1295			GODIN	1	BEURLING	10	31		11	1	2		14		11	33		1			S	11	3	0	0	0	05:00:00-05:59:00	2012	0	Dommages matériels seulement	Montréal(06)	Montréal (66 )	3	0	0	0	0	0	0	0	0	0	0	0	0
SPVM _ 2012 _ 10088	ME	2012/06/20	66023				RICHARD	1	BANNANTYNE	20			11	1	2		14		11	33		1			S	11	2	0	0	0	12:00:00-12:59:00	2012	0	Dommages matériels inférieurs au seuil de rapportage	Montréal(06)	Montréal (66 )	2	0	0	0	0	0	0	0	0	0	0	0	0
SPVM _ 2012 _ 10089	VE	2012/06/22	66023				GALT	1	WELLINGTON		31		11	1	2		14		11	32		1				11	2	0	0	0	09:00:00-09:59:00	2012	0	Dommages matériels seulement	Montréal(06)	Montréal (66 )	2	0	0	0	0	0	0	0	0	0	0	0	0
SPVM _ 2012 _ 1009	SA	2012/10/20	66142				SOMMERSET	1	GARLAND		59		12	2	2		14		11	32		2				14	1	0	0	1	06:00:00-06:59:00	2012	1	Léger	Montréal(06)	Montréal (66 )	1	0	0	0	0	0	0	0	0	0	0	0	0
SPVM _ 2012 _ 10090	VE	2012/06/22	66023				WELLINGTON	1	GORDON		31		11	1	3		13		11	32		2				11	2	0	0	0	15:00:00-15:59:00	2012	0	Dommages matériels seulement	Montréal(06)	Montréal (66 )	2	0	0	0	0	0	0	0	0	0	0	0	0
SPVM _ 2012 _ 10091	SA	2012/06/16	66023						TERRITOIRE VILLE DE MONTREAL		31																2	0	0	0	10:00:00-10:59:00	2012	0	Dommages matériels inférieurs au seuil de rapportage	Montréal(06)	Montréal (66 )	1	0	0	0	0	0	0	0	0	0	0	0	1
SPVM _ 2012 _ 10092	SA	2012/06/23	66023	40			PL DU COMMERCE	2	LEVERT		31		11	1	3		13		11	32		2				11	2	0	0	0	Non précisé	2012	0	Dommages matériels seulement	Montréal(06)	Montréal (66 )	1	0	0	0	0	0	0	0	0	0	0	0	1
SPVM _ 2012 _ 10093	DI	2012/06/24	66023	4630			LASALLE				31		11	1	2		14		11	34		2				11	2	0	0	0	16:00:00-16:59:00	2012	0	Dommages matériels inférieurs au seuil de rapportage	Montréal(06)	Montréal (66 )	2	0	0	0	0	0	0	0	0	0	0	0	0
SPVM _ 2012 _ 10094	DI	2012/06/24	66023	3533			EVELYNE	1	STRATHMORE	100	31		11	3	2		14		11	33		1			O	12	2	0	0	0	Non précisé	2012	0	Dommages matériels inférieurs au seuil de rapportage	Montréal(06)	Montréal (66 )	1	0	0	1	0	0	0	0	0	0	0	0	0
SPVM _ 2012 _ 10095	JE	2012/06/28	66023	612			BRAULT	1	VERDUN	100	52		11	1	3		16		11	33		1			O	11	1	0	0	0	Non précisé	2012	0	Dommages matériels inférieurs au seuil de rapportage	Montréal(06)	Montréal (66 )	0	1	0	0	0	0	0	0	0	0	0	0	0
SPVM _ 2012 _ 10096	JE	2012/06/28	66023	1177			DE L EGLISE				31		11	1	3		21		11	40						11	2	0	0	0	11:00:00-11:59:00	2012	0	Dommages matériels inférieurs au seuil de rapportage	Montréal(06)	Montréal (66 )	1	0	0	0	0	0	0	0	1	0	0	0	0
SPVM _ 2012 _ 10097	VE	2012/06/29	66023	151			3E AV				31		11	2	2		14		11	34		1				11	2	0	0	0	20:00:00-20:59:00	2012	0	Dommages matériels inférieurs au seuil de rapportage	Montréal(06)	Montréal (66 )	1	1	0	0	0	0	0	0	0	0	0	0	0
SPVM _ 2012 _ 10098	ME	2012/06/27	66023	100			DE GASPE				31		11	1	2		21		11	99		1				11	2	0	0	0	Non précisé	2012	0	Dommages matériels inférieurs au seuil de rapportage	Montréal(06)	Montréal (66 )	2	0	0	0	0	0	0	0	0	0	0	0	0
SPVM _ 2012 _ 10099	SA	2012/06/30	66023				GAETAN LABERGE	1	GILBERTE DUBE		31		11	1	2		14	1	11	32	6					11	2	0	0	2	13:00:00-13:59:00	2012	2	Léger	Montréal(06)	Montréal (66 )	2	0	0	0	0	0	0	0	0	0	0	0	0
SPVM _ 2012 _ 101	VE	2012/02/24	66023	3			3E AV S	2	DS LE DRIVEWAY		31		16	2	2		22									17	2	0	0	0	18:00:00-18:59:00	2012	0	Dommages matériels seulement	Montréal(06)	Montréal (66 )	1	0	0	0	0	0	0	0	0	0	0	0	1
SPVM _ 2012 _ 1010	SA	2012/10/20	66142	11600			SALABERRY	1	SOURCES	100	31		11	1	3		21		11	40		2			O	11	2	0	0	0	Non précisé	2012	0	Dommages matériels seulement	Montréal(06)	Montréal (66 )	1	0	0	0	0	0	0	0	0	0	0	0	1
SPVM _ 2012 _ 10100	LU	2012/07/02	66023	42			COMMERCE DU				31		11	1	3		21									11	2	0	0	0	12:00:00-12:59:00	2012	0	Dommages matériels seulement	Montréal(06)	Montréal (66 )	2	0	0	0	0	0	0	0	0	0	0	0	0
SPVM _ 2012 _ 10101	LU	2012/07/02	66023				WELLINGTON	1	WILLIBRORD		31		11	1	3		13	1	11	32	6	2				11	2	0	0	1	14:00:00-14:59:00	2012	1	Léger	Montréal(06)	Montréal (66 )	2	0	0	0	0	0	0	0	0	0	0	0	0
SPVM _ 2012 _ 10102	MA	2012/07/03	66023	769			ARGYLE	1	BANNANTYNE	150	31		11		2		14		11	34		1			S	11	2	0	0	0	11:00:00-11:59:00	2012	0	Dommages matériels inférieurs au seuil de rapportage	Montréal(06)	Montréal (66 )	1	0	0	0	0	0	0	0	0	0	0	0	1
SPVM _ 2012 _ 10103	ME	2012/07/04	66023	3031			RUSHBROOKE	1	MAY	100	43		11	1	2		14		11	32		1			O	11	1	0	0	0	06:00:00-06:59:00	2012	0	Dommages matériels inférieurs au seuil de rapportage	Montréal(06)	Montréal (66 )	0	1	0	0	0	0	0	0	0	0	0	0	0
SPVM _ 2012 _ 10104	ME	2012/07/04	66023	4000			LASALLE				31		11	1	3		19		11	99		1				11	2	0	0	0	13:00:00-13:59:00	2012	0	Dommages matériels inférieurs au seuil de rapportage	Montréal(06)	Montréal (66 )	2	0	0	0	0	0	0	0	0	0	0	0	0
SPVM _ 2012 _ 10105	JE	2012/07/05	66023				DE VERDUIN	1	6EME AV		33		11	1	2		14	1	11	32	6	1				11	2	0	0	1	10:00:00-10:59:00	2012	1	Léger	Montréal(06)	Montréal (66 )	1	0	0	0	1	0	0	0	0	0	0	0	0
SPVM _ 2012 _ 10106	ME	2012/07/04	66023	5100			VERDUN				31		11	1	3		13		11	99		2				11	2	0	0	0	13:00:00-13:59:00	2012	0	Dommages matériels inférieurs au seuil de rapportage	Montréal(06)	Montréal (66 )	1	1	0	0	0	0	0	0	0	0	0	0	0
SPVM _ 2012 _ 10107	JE	2012/07/05	66023				ATWATER	1	JOSEPH	100	31		11	1	2		14		11	39		5			N	11	2	0	0	0	15:00:00-15:59:00	2012	0	Dommages matériels seulement	Montréal(06)	Montréal (66 )	2	0	0	0	0	0	0	0	0	0	0	0	0
SPVM _ 2012 _ 10108	ME	2012/07/04	66023	500			CH DU GOLF				31		11	2	3		21		11	40						11	2	0	0	0	22:00:00-22:59:00	2012	0	Dommages matériels inférieurs au seuil de rapportage	Montréal(06)	Montréal (66 )	1	0	0	0	0	0	0	0	0	0	0	0	1
SPVM _ 2012 _ 10109	VE	2012/07/06	66023	42			PL DU COMMERCE	2	STAT EPICERIE LOBLAWS		31		11	1	3		21		11	99		9			N	11	2	0	0	0	17:00:00-17:59:00	2012	0	Dommages matériels inférieurs au seuil de rapportage	Montréal(06)	Montréal (66 )	2	0	0	0	0	0	0	0	0	0	0	0	0
SPVM _ 2012 _ 1011	DI	2012/10/21	66142	47			BRUNSWICK	2	STAT	100	50		11	1	3		21		11	40		9			N	11	1	0	0	0	11:00:00-11:59:00	2012	0	Dommages matériels inférieurs au seuil de rapportage	Montréal(06)	Montréal (66 )	1	0	0	0	0	0	0	0	0	0	0	0	0
SPVM _ 2012 _ 10110	VE	2012/07/06	66023	5600			LASALLE				32			4	7		19	1			5					11	1	0	0	1	23:00:00-23:59:00	2012	1	Léger	Montréal(06)	Montréal (66 )	0	0	0	0	0	0	0	0	0	0	0	0	1
SPVM _ 2012 _ 10111	JE	2012/07/05	66023	4452			VERDUN				49				3		21										1	0	0	0	08:00:00-08:59:00	2012	0	Dommages matériels inférieurs au seuil de rapportage	Montréal(06)	Montréal (66 )	0	0	0	0	0	0	0	0	0	0	0	0	1
SPVM _ 2012 _ 10112	JE	2012/07/05	66023	5225			WELLINGTON						11	1	2		14		11			2				11	2	0	0	0	11:00:00-11:59:00	2012	0	Dommages matériels inférieurs au seuil de rapportage	Montréal(06)	Montréal (66 )	1	0	0	0	0	0	0	0	0	0	0	0	1
SPVM _ 2012 _ 10113	LU	2012/07/09	66023				BANNANTYNE		4EME AV		31		11	1	2		14		11	32		1			N	11	2	0	0	0	15:00:00-15:59:00	2012	0	Dommages matériels inférieurs au seuil de rapportage	Montréal(06)	Montréal (66 )	2	0	0	0	0	0	0	0	0	0	0	0	0
SPVM _ 2012 _ 10114	MA	2012/07/10	66023				LASALLE	1	GORDON		31		11	1	3		13		21			2				11	2	0	0	0	Non précisé	2012	0	Dommages matériels inférieurs au seuil de rapportage	Montréal(06)	Montréal (66 )	2	0	0	0	0	0	0	0	0	0	0	0	0
SPVM _ 2012 _ 10115	ME	2012/07/11	66023	4245			BD LASALLE				31		11	1	3		13		11	34		3				11	2	0	0	0	07:00:00-07:59:00	2012	0	Dommages matériels inférieurs au seuil de rapportage	Montréal(06)	Montréal (66 )	1	0	0	0	0	0	0	0	0	0	0	0	1
SPVM _ 2012 _ 10116	JE	2012/07/12	66023	5529			VERDUN				31		11	1	2		14		11	32		2				11	2	0	0	0	11:00:00-11:59:00	2012	0	Dommages matériels inférieurs au seuil de rapportage	Montréal(06)	Montréal (66 )	2	0	0	0	0	0	0	0	0	0	0	0	0
SPVM _ 2012 _ 10117	VE	2012/07/13	66023				LASALLE	1	RUSHBROOKE	5	31		11	1	2		14		11	32		2			S	11	3	0	0	0	07:00:00-07:59:00	2012	0	Dommages matériels seulement	Montréal(06)	Montréal (66 )	3	0	0	0	0	0	0	0	0	0	0	0	0
SPVM _ 2012 _ 10118	VE	2012/07/13	66023	4437			WELLINGTON	1	RIELLE	100	32		11	1	3		14	1	11	34		2			O	11	1	0	0	1	11:00:00-11:59:00	2012	1	Léger	Montréal(06)	Montréal (66 )	1	0	0	0	0	0	0	0	0	0	0	0	0
SPVM _ 2012 _ 10119	VE	2012/07/13	66023				CHAMPLAIN	1	OSBORNE		32		11	1	2		14	1	11	32	6					11	1	0	0	0	13:00:00-13:59:00	2012	0	Dommages matériels inférieurs au seuil de rapportage	Montréal(06)	Montréal (66 )	0	0	0	0	0	0	0	0	0	0	0	0	1
SPVM _ 2012 _ 1012	DI	2012/10/21	66142	11798			SALABERRY				31		11	1	3		21		11	40		9				11	2	0	0	0	14:00:00-14:59:00	2012	0	Dommages matériels inférieurs au seuil de rapportage	Montréal(06)	Montréal (66 )	1	0	0	0	0	0	0	0	0	0	0	0	1
SPVM _ 2012 _ 10120	VE	2012/07/13	66023	650			EGAH				31		11	1	2		14		11	99		1				11	2	0	0	0	11:00:00-11:59:00	2012	0	Dommages matériels inférieurs au seuil de rapportage	Montréal(06)	Montréal (66 )	2	0	0	0	0	0	0	0	0	0	0	0	0
SPVM _ 2012 _ 10121	ME	2012/07/18	66023	515			HALL	1	BD ILE DES SOEURS	50	31		11	2	2		14		11	34		2				11	2	0	0	0	20:00:00-20:59:00	2012	0	Dommages matériels inférieurs au seuil de rapportage	Montréal(06)	Montréal (66 )	2	0	0	0	0	0	0	0	0	0	0	0	0
SPVM _ 2012 _ 10122	JE	2012/07/19	66023				HICKSON	1	WELLINGTON		31		11	1	2		14		11	34		2				11	2	0	0	0	14:00:00-14:59:00	2012	0	Dommages matériels inférieurs au seuil de rapportage	Montréal(06)	Montréal (66 )	2	0	0	0	0	0	0	0	0	0	0	0	0
SPVM _ 2012 _ 10123	JE	2012/07/19	66023	3260			BD JOSEPH	1	CAISSE	30	31		11	1	2		14		11	34		2			E	11	2	0	0	0	13:00:00-13:59:00	2012	0	Dommages matériels inférieurs au seuil de rapportage	Montréal(06)	Montréal (66 )	2	0	0	0	0	0	0	0	0	0	0	0	0
SPVM _ 2012 _ 10124	VE	2012/07/20	66023	1038			RIVERVIEW	1	BANNANTYNE	110	31		11	1	2		14		11	99		9			N	11	2	0	0	0	16:00:00-16:59:00	2012	0	Dommages matériels inférieurs au seuil de rapportage	Montréal(06)	Montréal (66 )	2	0	0	0	0	0	0	0	0	0	0	0	0
SPVM _ 2012 _ 10125	SA	2012/07/21	66023	3163			DE VERDUN				31		99	1	2		21		11	99		9				99	2	0	0	0	Non précisé	2012	0	Dommages matériels inférieurs au seuil de rapportage	Montréal(06)	Montréal (66 )	2	0	0	0	0	0	0	0	0	0	0	0	0
SPVM _ 2012 _ 10126	SA	2012/07/21	66023				GORDON	1	WELLINGTON	10	31		11	1	2		14		11	33		1			N	11	2	0	0	0	14:00:00-14:59:00	2012	0	Dommages matériels inférieurs au seuil de rapportage	Montréal(06)	Montréal (66 )	1	0	0	0	0	0	0	0	0	0	0	0	1
SPVM _ 2012 _ 10127	LU	2012/07/23	66023				VERDUN ET WILLIBROD	1	VERDUN ET WILLIBROD		31		11	1	2		14	1	11	32	6	2				11	3	0	0	1	11:00:00-11:59:00	2012	1	Léger	Montréal(06)	Montréal (66 )	3	0	0	0	0	0	0	0	0	0	0	0	0
SPVM _ 2012 _ 10128	LU	2012/07/23	66023				ELGAR	1	BD ILE DES SOEURS	15	31		12	2	2		14		11			2				15	2	0	0	0	21:00:00-21:59:00	2012	0	Dommages matériels inférieurs au seuil de rapportage	Montréal(06)	Montréal (66 )	2	0	0	0	0	0	0	0	0	0	0	0	0
SPVM _ 2012 _ 10129	MA	2012/07/24	66023	5561			VERDUN				31																2	0	0	0	11:00:00-11:59:00	2012	0	Dommages matériels inférieurs au seuil de rapportage	Montréal(06)	Montréal (66 )	2	0	0	0	0	0	0	0	0	0	0	0	0
SPVM _ 2012 _ 1013	MA	2012/10/23	66142	6149			DES SOURCES	1	BRUNSWICK	50	31		11	1	3		21		11	40					S	11	2	0	0	0	Non précisé	2012	0	Dommages matériels seulement	Montréal(06)	Montréal (66 )	1	0	0	0	0	0	0	0	0	0	0	0	1
SPVM _ 2012 _ 10130	MA	2012/07/24	66023	1			ALEXANDRE GRAHAM BELL				31		11	1	3		21		11	99		9				11	2	0	0	0	05:00:00-05:59:00	2012	0	Dommages matériels inférieurs au seuil de rapportage	Montréal(06)	Montréal (66 )	1	0	0	0	0	0	0	0	0	0	0	0	1
SPVM _ 2012 _ 10131	ME	2012/07/25	66023	14			GALT				31		11		2		16		11							11	2	0	0	0	18:00:00-18:59:00	2012	0	Dommages matériels inférieurs au seuil de rapportage	Montréal(06)	Montréal (66 )	1	0	0	0	0	0	0	0	0	0	0	0	1
SPVM _ 2012 _ 10132	JE	2012/07/26	66023				WELLINGTON	1	GALT	5	33		11	3	3		13	2	11	32	6	2	1		E	12	2	0	0	1	20:00:00-20:59:00	2012	1	Léger	Montréal(06)	Montréal (66 )	1	0	0	0	1	0	0	0	0	0	0	0	0
SPVM _ 2012 _ 10133	VE	2012/07/27	66023					2	FACE AU 14 PL DU COMMERCE		31		11	1	3		14		11	32		2				11	2	0	0	0	16:00:00-16:59:00	2012	0	Dommages matériels inférieurs au seuil de rapportage	Montréal(06)	Montréal (66 )	1	0	0	0	0	0	0	0	0	0	0	0	1
SPVM _ 2012 _ 10134	VE	2012/07/27	66023	1101			3E AV				31		11	1	2		14		11	33		1				11	2	0	0	0	16:00:00-16:59:00	2012	0	Dommages matériels inférieurs au seuil de rapportage	Montréal(06)	Montréal (66 )	2	0	0	0	0	0	0	0	0	0	0	0	0
SPVM _ 2012 _ 10135	VE	2012/07/27	66023				ARGYLE	1	VERDUN		31		11	1	3		14		11	32		1				11	2	0	0	0	22:00:00-22:59:00	2012	0	Dommages matériels inférieurs au seuil de rapportage	Montréal(06)	Montréal (66 )	1	0	0	0	0	1	0	0	0	0	0	0	0
SPVM _ 2012 _ 10136	LU	2012/07/30	66023					1	LASALLE ET DE L EGLISE	10	31		11	1	2		14		11	33		2			E	11	2	0	0	0	08:00:00-08:59:00	2012	0	Dommages matériels inférieurs au seuil de rapportage	Montréal(06)	Montréal (66 )	1	0	0	0	0	0	0	0	1	0	0	0	0
SPVM _ 2012 _ 10137	MA	2012/07/31	66023					1	RIELLE ET WELLINGTON		59		11	3	2		14		11	32		1				11	2	0	0	0	00:00:00-00:59:00	2012	0	Dommages matériels inférieurs au seuil de rapportage	Montréal(06)	Montréal (66 )	1	0	0	0	0	0	0	0	0	0	0	0	1
SPVM _ 2012 _ 10138	MA	2012/07/31	66023	744			MELROSE	1	VERDUN	100	31		11	1	2		14		11	34		1	1			11	2	0	0	0	12:00:00-12:59:00	2012	0	Dommages matériels inférieurs au seuil de rapportage	Montréal(06)	Montréal (66 )	1	1	0	0	0	0	0	0	0	0	0	0	0
SPVM _ 2012 _ 10139	MA	2012/07/31	66023								31																2	0	0	0	Non précisé	2012	0	Dommages matériels inférieurs au seuil de rapportage	Montréal(06)	Montréal (66 )	1	0	0	0	0	0	0	0	0	0	0	0	1
SPVM _ 2012 _ 1014	MA	2012/10/23	66142	3237			BD DES SOURCES				31		11	1	3		21		11	40		9				11	2	0	0	0	17:00:00-17:59:00	2012	0	Dommages matériels inférieurs au seuil de rapportage	Montréal(06)	Montréal (66 )	2	0	0	0	0	0	0	0	0	0	0	0	0
SPVM _ 2012 _ 10140	MA	2012/07/31	66023				1RE AV	1	VERDUN	80	31		11	3	2		14		11	34		1			N	11	2	0	0	0	23:00:00-23:59:00	2012	0	Dommages matériels inférieurs au seuil de rapportage	Montréal(06)	Montréal (66 )	1	0	0	0	0	0	0	0	0	0	0	0	1
SPVM _ 2012 _ 10141	ME	2012/08/01	66023	42			PL DU COMMERCE	1	LEVERT	1000	31		11	1	3		21		11	40		4			S	11	2	0	0	0	16:00:00-16:59:00	2012	0	Dommages matériels seulement	Montréal(06)	Montréal (66 )	2	0	0	0	0	0	0	0	0	0	0	0	0
SPVM _ 2012 _ 10142	VE	2012/08/03	66023	5550			BD LASALLE	1	WELLINGTON		31		11	1	9		13		11	32		1			S	11	2	0	0	0	Non précisé	2012	0	Dommages matériels seulement	Montréal(06)	Montréal (66 )	1	0	0	0	0	0	0	0	0	0	0	0	1
SPVM _ 2012 _ 10143	SA	2012/08/04	66023	3965			BANNANTYNE						11	3	2		14		11	34						11	2	0	0	0	Non précisé	2012	0	Dommages matériels inférieurs au seuil de rapportage	Montréal(06)	Montréal (66 )	2	0	0	0	0	0	0	0	0	0	0	0	0
SPVM _ 2012 _ 10144	VE	2012/08/03	66023	4061			WELLINGTON				31		11	1	3		13		11	33		2				11	2	0	0	0	10:00:00-10:59:00	2012	0	Dommages matériels inférieurs au seuil de rapportage	Montréal(06)	Montréal (66 )	2	0	0	0	0	0	0	0	0	0	0	0	0
SPVM _ 2012 _ 10145	VE	2012/08/03	66023	30			PL DU COMMERCE				31		11	1	3		21									11	2	0	0	0	15:00:00-15:59:00	2012	0	Dommages matériels inférieurs au seuil de rapportage	Montréal(06)	Montréal (66 )	2	0	0	0	0	0	0	0	0	0	0	0	0
SPVM _ 2012 _ 10146	MA	2012/08/07	66023	100			DE GASPE	2	BD ILE DES SOEURS	50	31		11		2		21		11	99					S		2	0	0	0	Non précisé	2012	0	Dommages matériels inférieurs au seuil de rapportage	Montréal(06)	Montréal (66 )	1	0	0	0	0	0	0	0	0	0	0	0	1
SPVM _ 2012 _ 10147	ME	2012/08/08	66023				MOFFAT	1	VERDUN	10	31		11	1	2		14		11	33		1			N	11	2	0	0	0	08:00:00-08:59:00	2012	0	Dommages matériels inférieurs au seuil de rapportage	Montréal(06)	Montréal (66 )	1	0	0	0	0	0	0	0	0	0	0	0	1
SPVM _ 2012 _ 10148	ME	2012/08/08	66023				BEATTY	1	BANNANTYNE	50	31		11	1	2		14		11	33		1			S	11	2	0	0	0	15:00:00-15:59:00	2012	0	Dommages matériels inférieurs au seuil de rapportage	Montréal(06)	Montréal (66 )	1	0	0	0	0	0	0	0	0	0	0	0	1
SPVM _ 2012 _ 10149	ME	2012/08/08	66023								31		11	1	3		21		11	40		9				11	2	0	0	0	08:00:00-08:59:00	2012	0	Dommages matériels inférieurs au seuil de rapportage	Montréal(06)	Montréal (66 )	2	0	0	0	0	0	0	0	0	0	0	0	0
SPVM _ 2012 _ 1015	MA	2012/10/23	66142	3399			BD DES SOURCES						11	4	3		21		11	40		4				11	2	0	0	0	20:00:00-20:59:00	2012	0	Dommages matériels inférieurs au seuil de rapportage	Montréal(06)	Montréal (66 )	1	0	0	0	0	0	0	0	0	0	0	0	1
SPVM _ 2012 _ 10150	JE	2012/08/09	66023	550			CH DU GOLF	2	WILLIAM PAUL		33		11	1	3		13	1	11	34	6	2				12	2	0	0	1	15:00:00-15:59:00	2012	1	Léger	Montréal(06)	Montréal (66 )	1	0	0	0	1	0	0	0	0	0	0	0	0
SPVM _ 2012 _ 10151	SA	2012/08/11	66023	5527			BANNANTYNE				31		12	1	2		14		11	34		2				14	3	0	0	0	18:00:00-18:59:00	2012	0	Dommages matériels seulement	Montréal(06)	Montréal (66 )	3	0	0	0	0	0	0	0	0	0	0	0	0
SPVM _ 2012 _ 10152	DI	2012/08/12	66023								31		11	4	2		14		11	33		2				11	2	0	0	0	02:00:00-02:59:00	2012	0	Dommages matériels inférieurs au seuil de rapportage	Montréal(06)	Montréal (66 )	2	0	0	0	0	0	0	0	0	0	0	0	0
SPVM _ 2012 _ 10153	DI	2012/08/12	66023				LASALLE	1	RUSHBROOKE		31		11	3	2		14		11	32		2				11	2	0	0	0	01:00:00-01:59:00	2012	0	Dommages matériels seulement	Montréal(06)	Montréal (66 )	2	0	0	0	0	0	0	0	0	0	0	0	0
SPVM _ 2012 _ 10154	LU	2012/08/13	66023	23			GORDON OPP DU	1	LASALLE	15			11	2	2		14		11	33		1			N	11	2	0	0	0	18:00:00-18:59:00	2012	0	Dommages matériels inférieurs au seuil de rapportage	Montréal(06)	Montréal (66 )	2	0	0	0	0	0	0	0	0	0	0	0	0
SPVM _ 2012 _ 10155	LU	2012/08/13	66023	7000			LASALLE	1	BANNANTYNE	50	31		11	2	7		14	1	11	33	6	4				11	2	0	0	1	20:00:00-20:59:00	2012	1	Léger	Montréal(06)	Montréal (66 )	2	0	0	0	0	0	0	0	0	0	0	0	0
SPVM _ 2012 _ 10156	LU	2012/08/13	66023	346			GORDON				31		11	1	2		14									11	2	0	0	0	20:00:00-20:59:00	2012	0	Dommages matériels inférieurs au seuil de rapportage	Montréal(06)	Montréal (66 )	1	0	0	0	0	0	0	0	0	0	0	0	1
SPVM _ 2012 _ 10157	ME	2012/08/15	66023					1	WELLINGTON ET GALT		32		11	1	5		13	1	11	32		2	1			11	1	0	0	2	15:00:00-15:59:00	2012	2	Léger	Montréal(06)	Montréal (66 )	0	0	0	1	0	0	0	0	0	0	0	0	0
SPVM _ 2012 _ 10158	JE	2012/08/16	66023				WOODLAND	1	DE VERDUN	10	31		11	3	3		14		11	33		2			N	11	2	0	0	0	21:00:00-21:59:00	2012	0	Dommages matériels seulement	Montréal(06)	Montréal (66 )	2	0	0	0	0	0	0	0	0	0	0	0	0
SPVM _ 2012 _ 10159	VE	2012/08/17	66023	11			O REILLY FACE A				31		11	1	2		14		11	33		2				11	2	0	0	0	18:00:00-18:59:00	2012	0	Dommages matériels inférieurs au seuil de rapportage	Montréal(06)	Montréal (66 )	2	0	0	0	0	0	0	0	0	0	0	0	0
SPVM _ 2012 _ 1016	MA	2012/10/16	66142	252			BISCAYE				31				2												2	0	0	0	Non précisé	2012	0	Dommages matériels inférieurs au seuil de rapportage	Montréal(06)	Montréal (66 )	1	0	0	0	0	0	0	0	0	0	0	0	1
SPVM _ 2012 _ 10160	SA	2012/08/18	66023				GABRIELLE ROY	1	BERLIOZ		31		11	1	2		14		11			2			S	11	2	0	0	0	17:00:00-17:59:00	2012	0	Dommages matériels inférieurs au seuil de rapportage	Montréal(06)	Montréal (66 )	2	0	0	0	0	0	0	0	0	0	0	0	0
SPVM _ 2012 _ 10161	MA	2012/08/21	66023				RIELLE	1	BANNANTYNE		43		11	1	2		14		11	33		1			N	11	2	0	0	0	06:00:00-06:59:00	2012	0	Dommages matériels seulement	Montréal(06)	Montréal (66 )	2	0	0	0	0	0	0	0	0	0	0	0	0
SPVM _ 2012 _ 10162	MA	2012/08/21	66023	14			PL D COMMERCE				31		11	1	3		21		11	40						11	3	0	0	0	08:00:00-08:59:00	2012	0	Dommages matériels inférieurs au seuil de rapportage	Montréal(06)	Montréal (66 )	3	0	0	0	0	0	0	0	0	0	0	0	0
SPVM _ 2012 _ 10163	LU	2012/08/20	66023				TERR DE MTL																				2	0	0	0	19:00:00-19:59:00	2012	0	Dommages matériels inférieurs au seuil de rapportage	Montréal(06)	Montréal (66 )	1	0	0	0	0	0	0	0	0	0	0	0	1
SPVM _ 2012 _ 10164	MA	2012/08/21	66023	5943			LASALLE	1	RICHARD	100	31		11	3	2		13		21	34		2			O	11	2	0	0	0	02:00:00-02:59:00	2012	0	Dommages matériels inférieurs au seuil de rapportage	Montréal(06)	Montréal (66 )	1	0	0	0	0	0	0	0	0	0	0	0	1
SPVM _ 2012 _ 10165	MA	2012/08/21	66023				MELROSE		BANNANTYNE	5			11		2		14		11	33		1			S	11	2	0	0	0	18:00:00-18:59:00	2012	0	Dommages matériels inférieurs au seuil de rapportage	Montréal(06)	Montréal (66 )	1	0	0	0	0	0	0	0	0	0	0	0	1
SPVM _ 2012 _ 10166	ME	2012/08/22	66023				BD DE L ILE DES SOEURS	1	GDE AL		33		11	1	2		13	1	11	33	5	5				11	2	0	0	1	07:00:00-07:59:00	2012	1	Léger	Montréal(06)	Montréal (66 )	1	0	0	0	1	0	0	0	0	0	0	0	0
SPVM _ 2012 _ 10167	ME	2012/08/22	66023	38			PL DU COMMERCE	2	BD RENE LEVESQUE	200	31		11	1	3		21	1	11	40	6	9			N	11	2	0	0	1	12:00:00-12:59:00	2012	1	Léger	Montréal(06)	Montréal (66 )	1	0	0	0	0	0	1	0	0	0	0	0	0
SPVM _ 2012 _ 10168	MA	2012/08/21	66023	3000			WELLINGTON	2	MAY		31		11	1	3		21		11							11	2	0	0	0	12:00:00-12:59:00	2012	0	Dommages matériels seulement	Montréal(06)	Montréal (66 )	1	0	0	0	0	0	0	0	0	0	0	0	1
SPVM _ 2012 _ 10169	ME	2012/08/22	66023				LESAGE	1	DE L EGLISE		31		11	1	3		13		11	32		3				11	2	0	0	0	17:00:00-17:59:00	2012	0	Dommages matériels seulement	Montréal(06)	Montréal (66 )	2	0	0	0	0	0	0	0	0	0	0	0	0
SPVM _ 2012 _ 1017	ME	2012/10/24	66142	288			BAFFIN				32		11	1	2		22	1	11	99	10	9				12	1	0	0	1	16:00:00-16:59:00	2012	1	Léger	Montréal(06)	Montréal (66 )	1	0	0	0	0	0	0	0	0	0	0	0	0
SPVM _ 2012 _ 10170	JE	2012/08/23	66023				VALIQUETTE	1	BEURLING		31		11	1	2		14		11	32		1				11	2	0	0	0	11:00:00-11:59:00	2012	0	Dommages matériels seulement	Montréal(06)	Montréal (66 )	1	0	0	1	0	0	0	0	0	0	0	0	0
SPVM _ 2012 _ 10171	VE	2012/08/24	66023				WELLINGTON	1	GALT	5	32		11	1	3		13		11	33		2	1		E	11	1	0	0	1	07:00:00-07:59:00	2012	1	Léger	Montréal(06)	Montréal (66 )	1	0	0	0	0	0	0	0	0	0	0	0	0
SPVM _ 2012 _ 10172	VE	2012/08/24	66023					1	DE L EGLISE ET VERDUN		31		11	1	5		14	1	11	32		1				11	2	0	0	2	07:00:00-07:59:00	2012	2	Léger	Montréal(06)	Montréal (66 )	2	0	0	0	0	0	0	0	0	0	0	0	0
SPVM _ 2012 _ 10173	VE	2012/08/24	66023				GERTRUDE	1	HICKSON				11	1	2		14		11	32		1				11	2	0	0	0	08:00:00-08:59:00	2012	0	Dommages matériels inférieurs au seuil de rapportage	Montréal(06)	Montréal (66 )	1	0	0	0	0	0	0	0	1	0	0	0	0
SPVM _ 2012 _ 10174	DI	2012/08/26	66023				BANNANTYNE	1	2IEME AV		31		11	1	2		13		11	32		2				11	2	0	0	0	18:00:00-18:59:00	2012	0	Dommages matériels inférieurs au seuil de rapportage	Montréal(06)	Montréal (66 )	2	0	0	0	0	0	0	0	0	0	0	0	0
SPVM _ 2012 _ 10175	MA	2012/08/21	66023				WOODLAND	1	BANNANTYNE		31		11	1	3		13		11	32		2				11	2	0	0	0	14:00:00-14:59:00	2012	0	Dommages matériels inférieurs au seuil de rapportage	Montréal(06)	Montréal (66 )	2	0	0	0	0	0	0	0	0	0	0	0	0
SPVM _ 2012 _ 10176	ME	2012/08/29	66023					1	RIELLE ET VERDUN		32		11	1	1		13	1	11	32	6	2				11	1	0	0	0	08:00:00-08:59:00	2012	0	Dommages matériels inférieurs au seuil de rapportage	Montréal(06)	Montréal (66 )	1	0	0	0	0	0	0	0	0	0	0	0	0
SPVM _ 2012 _ 10177	ME	2012/08/29	66023	3803			CLAUDE		DUPUIS	50	31		11	1	2		14		21	32		1			O	11	2	0	0	0	13:00:00-13:59:00	2012	0	Dommages matériels seulement	Montréal(06)	Montréal (66 )	1	0	1	0	0	0	0	0	0	0	0	0	0
SPVM _ 2012 _ 10178	ME	2012/08/29	66023				GORDON	1	BANNANTYNE	25	31		11		2		14		11	33		1			S	11	2	0	0	0	Non précisé	2012	0	Dommages matériels inférieurs au seuil de rapportage	Montréal(06)	Montréal (66 )	1	0	0	0	0	0	0	0	0	0	0	0	1
SPVM _ 2012 _ 10179	ME	2012/08/29	66023	3830			VERDUN	2	FACE A		31		11	1	2		14		11	34		2				11	2	0	0	0	16:00:00-16:59:00	2012	0	Dommages matériels inférieurs au seuil de rapportage	Montréal(06)	Montréal (66 )	2	0	0	0	0	0	0	0	0	0	0	0	0
SPVM _ 2012 _ 1018	JE	2012/10/25	66142				LAKE	1	DE SALABERRY	50	31		11	1	2		13	1	21		6	2			N	11	2	0	0	2	09:00:00-09:59:00	2012	2	Léger	Montréal(06)	Montréal (66 )	2	0	0	0	0	0	0	0	0	0	0	0	0
SPVM _ 2012 _ 10180	DI	2012/09/02	66023				STEPHENS	1	BEURLING			9	11	1	2		14		11	33		1				11	2	0	0	0	15:00:00-15:59:00	2012	0	Dommages matériels inférieurs au seuil de rapportage	Montréal(06)	Montréal (66 )	2	0	0	0	0	0	0	0	0	0	0	0	0
SPVM _ 2012 _ 10181	DI	2012/09/02	66023	210			BERLIOZ				32		11	4	2		14	1	11	33	6	1				11	1	0	0	1	22:00:00-22:59:00	2012	1	Léger	Montréal(06)	Montréal (66 )	1	0	0	0	0	0	0	0	0	0	0	0	0
SPVM _ 2012 _ 10182	LU	2012/09/03	66023	242			3E AV	1	WELLINGTON	20	31		11	1	2		14		11	33		1			S	11	2	0	0	0	18:00:00-18:59:00	2012	0	Dommages matériels inférieurs au seuil de rapportage	Montréal(06)	Montréal (66 )	1	0	0	0	0	0	0	0	0	0	0	0	1
SPVM _ 2012 _ 10183	MA	2012/09/04	66023	4			PL DU COMMERCE				31		11	1	3		14		11	34		1				12	2	0	0	0	10:00:00-10:59:00	2012	0	Dommages matériels inférieurs au seuil de rapportage	Montréal(06)	Montréal (66 )	2	0	0	0	0	0	0	0	0	0	0	0	0
SPVM _ 2012 _ 10184	ME	2012/09/05	66023				LASALLE	1	ROLLAND		31		11	1	2		14	1	11	32	10	2			E	11	2	0	0	0	10:00:00-10:59:00	2012	0	Dommages matériels inférieurs au seuil de rapportage	Montréal(06)	Montréal (66 )	1	0	0	0	0	0	0	1	0	0	0	0	0
SPVM _ 2012 _ 10185	ME	2012/09/05	66023				RIELLE	1	WELLINGTON	30	31		11	1	3		14		11	33		1			N	11	2	0	0	0	09:00:00-09:59:00	2012	0	Dommages matériels seulement	Montréal(06)	Montréal (66 )	2	0	0	0	0	0	0	0	0	0	0	0	0
SPVM _ 2012 _ 10186	MA	2012/09/04	66023					1	BRAULT ET VERDUN	10	31		11	1	2		14		11	33		1			N	12	2	0	0	0	17:00:00-17:59:00	2012	0	Dommages matériels inférieurs au seuil de rapportage	Montréal(06)	Montréal (66 )	2	0	0	0	0	0	0	0	0	0	0	0	0
SPVM _ 2012 _ 10187	ME	2012/09/05	66023	210			CH DU GOLF	1	PL DU COMMERCE		31		11	1	3		13		11	31		1				11	2	0	0	0	16:00:00-16:59:00	2012	0	Dommages matériels seulement	Montréal(06)	Montréal (66 )	1	1	0	0	0	0	0	0	0	0	0	0	0
SPVM _ 2012 _ 10188	JE	2012/09/06	66023				EVELYN	1	CAISSE	50	31		11	1	2		14		11	34		1			O	11	2	0	0	0	10:00:00-10:59:00	2012	0	Dommages matériels inférieurs au seuil de rapportage	Montréal(06)	Montréal (66 )	1	0	0	0	0	0	0	0	0	0	0	0	1
SPVM _ 2012 _ 10189	JE	2012/09/06	66023	42			PL DU COMMERCE				31		11	1	3		21		11	40		9				11	2	0	0	0	11:00:00-11:59:00	2012	0	Dommages matériels inférieurs au seuil de rapportage	Montréal(06)	Montréal (66 )	1	0	0	0	0	0	0	0	0	0	0	0	1
SPVM _ 2012 _ 1019	VE	2012/10/26	66142				BRUNSWICK	1	LAKE		31		11	1	3		13	1	11	32	6	3				11	2	0	0	1	Non précisé	2012	1	Léger	Montréal(06)	Montréal (66 )	2	0	0	0	0	0	0	0	0	0	0	0	0
SPVM _ 2012 _ 10190	JE	2012/09/06	66023	3483			GERTRUDE ARR				31		11		2		21		11	33		9				11	2	0	0	0	Non précisé	2012	0	Dommages matériels inférieurs au seuil de rapportage	Montréal(06)	Montréal (66 )	2	0	0	0	0	0	0	0	0	0	0	0	0
SPVM _ 2012 _ 10191	DI	2012/09/02	66023	450			REGINA FACE	1	EVELYN	100	31		11	1	2		14		11	34		2			S	11	2	0	0	0	09:00:00-09:59:00	2012	0	Dommages matériels inférieurs au seuil de rapportage	Montréal(06)	Montréal (66 )	1	0	0	0	0	0	0	0	0	0	0	0	1
SPVM _ 2012 _ 10192	SA	2012/09/08	66023				BANNANTYNE		GORDON				12	1	3		13		11	32		2				14	2	0	0	0	16:00:00-16:59:00	2012	0	Dommages matériels inférieurs au seuil de rapportage	Montréal(06)	Montréal (66 )	2	0	0	0	0	0	0	0	0	0	0	0	0
SPVM _ 2012 _ 10193	LU	2012/09/10	66023				DE GASPE	1	DE GASPE	5	31		11	1	1		14		11	33		2			O	12	2	0	0	0	13:00:00-13:59:00	2012	0	Dommages matériels inférieurs au seuil de rapportage	Montréal(06)	Montréal (66 )	2	0	0	0	0	0	0	0	0	0	0	0	0
SPVM _ 2012 _ 10194	SA	2012/09/08	66023	790			GALT				31		11		2		14		11	34		1				11	2	0	0	0	12:00:00-12:59:00	2012	0	Dommages matériels inférieurs au seuil de rapportage	Montréal(06)	Montréal (66 )	1	0	0	0	0	0	0	0	0	0	0	0	1
SPVM _ 2012 _ 10195	MA	2012/09/11	66023	3180			WELLINGTON	1	GILBERTE DUBE		31		11	1	3		21		11	40		9				11	2	0	0	0	12:00:00-12:59:00	2012	0	Dommages matériels inférieurs au seuil de rapportage	Montréal(06)	Montréal (66 )	0	0	0	0	0	0	1	0	0	0	0	0	1
SPVM _ 2012 _ 10196	JE	2012/09/13	66023				2E AV	1	WELLINGTON				11	1	2		14		11	32		1				11	2	0	0	0	10:00:00-10:59:00	2012	0	Dommages matériels seulement	Montréal(06)	Montréal (66 )	1	1	0	0	0	0	0	0	0	0	0	0	0
SPVM _ 2012 _ 10197	ME	2012/09/12	66023				BANNANTYNE	1	2E AV	30	31		11	1	2		14		11	33		2			O	11	2	0	0	0	10:00:00-10:59:00	2012	0	Dommages matériels inférieurs au seuil de rapportage	Montréal(06)	Montréal (66 )	1	0	0	0	0	0	0	0	0	0	0	0	1
SPVM _ 2012 _ 10198	JE	2012/09/13	66023					1	1RE AV ET BANNANTYNE		33		11	1	2		14		11			2				11	2	0	0	1	15:00:00-15:59:00	2012	1	Léger	Montréal(06)	Montréal (66 )	0	0	0	1	1	0	0	0	0	0	0	0	0
SPVM _ 2012 _ 10199	ME	2012/09/12	66023				WELLINGTON	1	GILBERT DUBE	10	31		11	1	3		13		11	34		2			E	11	2	0	0	0	16:00:00-16:59:00	2012	0	Dommages matériels inférieurs au seuil de rapportage	Montréal(06)	Montréal (66 )	1	0	0	0	0	0	0	0	0	0	0	0	1
SPVM _ 2012 _ 102	VE	2012/02/24	66023				BD GOUIN O	1	CH DE LA RIVE BOISEE		31		16	3	2		14		11	32		2				17	2	0	0	0	20:00:00-20:59:00	2012	0	Dommages matériels inférieurs au seuil de rapportage	Montréal(06)	Montréal (66 )	2	0	0	0	0	0	0	0	0	0	0	0	0
SPVM _ 2012 _ 1020	VE	2012/10/26	66142	4460			ST JEAN				31		11	1	2		13	1	11	99	6	3				11	2	0	0	1	13:00:00-13:59:00	2012	1	Léger	Montréal(06)	Montréal (66 )	1	1	0	0	0	0	0	0	0	0	0	0	0
SPVM _ 2012 _ 10200	VE	2012/09/14	66023				BANNANTYNE	1	MELROSE	15	31				2		14		11	32		2					2	0	0	0	09:00:00-09:59:00	2012	0	Dommages matériels seulement	Montréal(06)	Montréal (66 )	1	0	0	0	0	0	0	0	0	0	0	0	1
SPVM _ 2012 _ 10201	DI	2012/09/16	66023				BD LASALLE	1	WOODLAND	20	43		11	3	2		13	1	11	34	6	2			O	11	1	0	0	1	05:00:00-05:59:00	2012	1	Léger	Montréal(06)	Montréal (66 )	1	0	0	0	0	0	0	0	0	0	0	0	0
SPVM _ 2012 _ 10202	DI	2012/09/16	66023				BD LASALLE	1	WOODLAND	20	43		11	3	2		13	1	11	34	6	2			O	11	1	0	0	1	05:00:00-05:59:00	2012	1	Léger	Montréal(06)	Montréal (66 )	1	0	0	0	0	0	0	0	0	0	0	0	0
SPVM _ 2012 _ 10203	MA	2012/09/18	66023	40			WILLIAM PAUL	1	CH DU GOLF	60	31		11	1	2		14		11	33		2				12	2	0	0	0	07:00:00-07:59:00	2012	0	Dommages matériels seulement	Montréal(06)	Montréal (66 )	1	0	0	1	0	0	0	0	0	0	0	0	0
SPVM _ 2012 _ 10204	ME	2012/09/19	66023					1	EVELYN		31	1	11	1	2		14		11	32		2				11	2	0	0	0	16:00:00-16:59:00	2012	0	Dommages matériels seulement	Montréal(06)	Montréal (66 )	2	0	0	0	0	0	0	0	0	0	0	0	0
SPVM _ 2012 _ 10205	JE	2012/09/20	66023				WELLINGTON	1	RIELLE		33		11	2	2		13	1	11	32	6	3				11	2	0	0	1	06:00:00-06:59:00	2012	1	Léger	Montréal(06)	Montréal (66 )	1	0	0	0	1	0	0	0	0	0	0	0	0
SPVM _ 2012 _ 10206	JE	2012/09/20	66023	1195			LLOYD GEORGE	1	LASALLE	20	31		11	1	2		14		11	33		2			N	11	3	0	0	0	08:00:00-08:59:00	2012	0	Dommages matériels seulement	Montréal(06)	Montréal (66 )	2	1	0	0	0	0	0	0	0	0	0	0	0
SPVM _ 2012 _ 10207	JE	2012/09/20	66023	3501			GAETAN LABERTE APP 531 MTL				31																2	0	0	0	Non précisé	2012	0	Dommages matériels inférieurs au seuil de rapportage	Montréal(06)	Montréal (66 )	1	0	0	0	0	0	0	0	0	0	0	0	1
SPVM _ 2012 _ 10208	JE	2012/09/20	66023				EGLISE	1	WELLINGTON		32		11	1	3		13	1	11	32	6	2				11	1	0	0	1	15:00:00-15:59:00	2012	1	Léger	Montréal(06)	Montréal (66 )	0	0	1	0	0	0	0	0	0	0	0	0	0
SPVM _ 2012 _ 10209	VE	2012/09/21	66023	1310			ROLLAND	2	CHAMPLAIN	75	31		11	1	2		14		11	33		1			E	11	2	0	0	0	15:00:00-15:59:00	2012	0	Dommages matériels inférieurs au seuil de rapportage	Montréal(06)	Montréal (66 )	2	0	0	0	0	0	0	0	0	0	0	0	0
SPVM _ 2012 _ 1021	VE	2012/10/26	66023				BRUNSWICK	1	MONTROSE		42		11	3	4		13	1	11	32	6	3				12	1	1	0	0	23:00:00-23:59:00	2012	1	Mortel	Montréal(06)	Montréal (66 )	1	0	0	0	0	0	0	0	0	0	0	0	0
SPVM _ 2012 _ 10210	VE	2012/09/21	66023				4E AV	1	DE VERDUN		31		12	3	3		13		11	32		1			N	14	2	0	0	0	21:00:00-21:59:00	2012	0	Dommages matériels seulement	Montréal(06)	Montréal (66 )	2	0	0	0	0	0	0	0	0	0	0	0	0
SPVM _ 2012 _ 10211	SA	2012/09/22	66023				BEURLING	1	OSBORNE		33		11	1	2		14	1	11	32	7	2				12	2	0	0	1	11:00:00-11:59:00	2012	1	Léger	Montréal(06)	Montréal (66 )	1	0	0	0	1	0	0	0	0	0	0	0	0
SPVM _ 2012 _ 10212	SA	2012/09/22	66023								31																2	0	0	0	Non précisé	2012	0	Dommages matériels inférieurs au seuil de rapportage	Montréal(06)	Montréal (66 )	1	0	0	0	0	0	0	0	0	0	0	0	1
SPVM _ 2012 _ 10213	SA	2012/09/22	66023				BANNANTYNE	1	WILLIBRORD		42		11	1	2		14		11	32		2				11	1	0	0	0	17:00:00-17:59:00	2012	0	Dommages matériels seulement	Montréal(06)	Montréal (66 )	1	0	0	0	0	0	0	0	0	0	0	0	0
SPVM _ 2012 _ 10214	DI	2012/09/23	66023	3840			GERTRUDE				31		11	3	2		14		11	34						11	2	0	0	0	03:00:00-03:59:00	2012	0	Dommages matériels seulement	Montréal(06)	Montréal (66 )	2	0	0	0	0	0	0	0	0	0	0	0	0
SPVM _ 2012 _ 10215	SA	2012/09/22	66023	95			CH DE LA PTE S	1	AV DES SOMMETS	125	31		12	1	2		14		11	34		2			S	14	2	0	0	0	Non précisé	2012	0	Dommages matériels seulement	Montréal(06)	Montréal (66 )	1	0	0	0	0	0	0	0	0	0	0	0	1
SPVM _ 2012 _ 10216	LU	2012/09/24	66023				BANNANTYNE	1	MELROSE		31		11	1	2		14	1	11	32	6	3				11	3	0	0	1	07:00:00-07:59:00	2012	1	Léger	Montréal(06)	Montréal (66 )	3	0	0	0	0	0	0	0	0	0	0	0	0
SPVM _ 2012 _ 10217	LU	2012/09/24	66023	3360			JOSEPH	1	CAISSE	500	31		11	1	2		14		11	33		2			O	11	2	0	0	0	Non précisé	2012	0	Dommages matériels seulement	Montréal(06)	Montréal (66 )	2	0	0	0	0	0	0	0	0	0	0	0	0
SPVM _ 2012 _ 10218	LU	2012/09/24	66023				TERRITOIRE DE MONTREAL				31																2	0	0	0	21:00:00-21:59:00	2012	0	Dommages matériels seulement	Montréal(06)	Montréal (66 )	1	0	0	0	0	0	0	0	0	0	0	0	1
SPVM _ 2012 _ 10219	MA	2012/09/25	66023	99			TROY				31		11	3	2		14		11			1				11	2	0	0	0	21:00:00-21:59:00	2012	0	Dommages matériels inférieurs au seuil de rapportage	Montréal(06)	Montréal (66 )	2	0	0	0	0	0	0	0	0	0	0	0	0
SPVM _ 2012 _ 1022	SA	2012/10/27	66142				DAVIGNON	1	BRUNSWICK		31		11	1	3		13		11	32		2				12	3	0	0	0	09:00:00-09:59:00	2012	0	Dommages matériels seulement	Montréal(06)	Montréal (66 )	3	0	0	0	0	0	0	0	0	0	0	0	0
SPVM _ 2012 _ 10220	ME	2012/09/26	66023	3821			ETHEL	1	HICKSON	150	31		11	1	2		14		11	33		1			N	12	2	0	0	0	Non précisé	2012	0	Dommages matériels inférieurs au seuil de rapportage	Montréal(06)	Montréal (66 )	2	0	0	0	0	0	0	0	0	0	0	0	0
SPVM _ 2012 _ 10221	ME	2012/09/26	66023	154			5IEME AV				31		11	3	2		14		11	34		1				11	4	0	0	0	22:00:00-22:59:00	2012	0	Dommages matériels seulement	Montréal(06)	Montréal (66 )	4	0	0	0	0	0	0	0	0	0	0	0	0
SPVM _ 2012 _ 10222	ME	2012/09/26	66023	1155			BEATTY	1	BANNANTYNE	300	31		11	1	2		14		11	34		1			N	12	2	0	0	0	Non précisé	2012	0	Dommages matériels inférieurs au seuil de rapportage	Montréal(06)	Montréal (66 )	1	0	0	0	0	0	0	0	0	0	0	0	1
SPVM _ 2012 _ 10223	JE	2012/09/27	66023	1042			ROLLAND	2	MONTEITH		31				2		14		11	34		1					2	0	0	0	Non précisé	2012	0	Dommages matériels inférieurs au seuil de rapportage	Montréal(06)	Montréal (66 )	0	0	0	0	0	0	1	0	0	0	0	0	1
SPVM _ 2012 _ 10224	VE	2012/09/28	66023	911			BD RENE LEVESQUE			10	31		11	1	3		13		21	33		3			N	11	2	0	0	0	10:00:00-10:59:00	2012	0	Dommages matériels seulement	Montréal(06)	Montréal (66 )	2	0	0	0	0	0	0	0	0	0	0	0	0
SPVM _ 2012 _ 10225	VE	2012/09/28	66023				ARGYLE	1	LASALLE		31		11	3	2		14		21	32		2			N	12	2	0	0	0	05:00:00-05:59:00	2012	0	Dommages matériels inférieurs au seuil de rapportage	Montréal(06)	Montréal (66 )	2	0	0	0	0	0	0	0	0	0	0	0	0
SPVM _ 2012 _ 10226	VE	2012/09/28	66023	1			PRES ALEXANDRE GRAHAM BELL	1	JACQUES LEBERT	100	31		11	1	3		13		11	31		1			O	11	2	0	0	0	Non précisé	2012	0	Dommages matériels inférieurs au seuil de rapportage	Montréal(06)	Montréal (66 )	2	0	0	0	0	0	0	0	0	0	0	0	0
SPVM _ 2012 _ 10227	SA	2012/09/29	66023	35			MESANGES DES				31				2		14		11	33		2				14	2	0	0	0	11:00:00-11:59:00	2012	0	Dommages matériels seulement	Montréal(06)	Montréal (66 )	1	0	0	0	0	0	0	0	0	0	0	0	1
SPVM _ 2012 _ 10228	MA	2012/09/25	66023						TERR SPVM		31			1	4												2	0	0	0	Non précisé	2012	0	Dommages matériels inférieurs au seuil de rapportage	Montréal(06)	Montréal (66 )	1	0	0	0	0	0	0	0	0	0	0	0	1
SPVM _ 2012 _ 10229	DI	2012/09/30	66023				5E AV	1	VERDUN		31		12	3	2		14		11	32		3				14	2	0	0	0	19:00:00-19:59:00	2012	0	Dommages matériels seulement	Montréal(06)	Montréal (66 )	2	0	0	0	0	0	0	0	0	0	0	0	0
SPVM _ 2012 _ 1023	SA	2012/10/27	66142				BLUE HAVEN	1	ST JEAN	10	31		11	1	3		13	1	11	33	6	5			N	11	2	0	0	2	13:00:00-13:59:00	2012	2	Léger	Montréal(06)	Montréal (66 )	1	0	0	0	0	1	0	0	0	0	0	0	0
SPVM _ 2012 _ 10230	LU	2012/10/01	66023	1410			LECLAIR						12	1	2		14		11	34		2				12	2	0	0	0	Non précisé	2012	0	Dommages matériels inférieurs au seuil de rapportage	Montréal(06)	Montréal (66 )	1	0	0	0	0	0	0	0	0	0	0	0	1
SPVM _ 2012 _ 10231	LU	2012/10/01	66023	292			3E AV								2		14		11	34		1				12	2	0	0	0	Non précisé	2012	0	Dommages matériels inférieurs au seuil de rapportage	Montréal(06)	Montréal (66 )	1	0	0	0	0	0	0	0	0	0	0	0	1
SPVM _ 2012 _ 10232	MA	2012/10/02	66023	3750			GAETAN LABERGE	2	HICKSON		40		11	1	3		13		11	34		3				11	1	0	0	0	15:00:00-15:59:00	2012	0	Dommages matériels inférieurs au seuil de rapportage	Montréal(06)	Montréal (66 )	0	1	0	0	0	0	0	0	0	0	0	0	0
SPVM _ 2012 _ 10233	ME	2012/10/03	66023				982 5E	2	BANNANTYNE		32		11	1	2		14		11	32		1				11	1	0	0	0	07:00:00-07:59:00	2012	0	Dommages matériels inférieurs au seuil de rapportage	Montréal(06)	Montréal (66 )	1	0	0	0	0	0	0	0	0	0	0	0	0
SPVM _ 2012 _ 10234	ME	2012/10/03	66023				CHAMPLAIN	1	DE L EGLISE		31		11	3	3		13		11	32		1				12	2	0	0	0	21:00:00-21:59:00	2012	0	Dommages matériels seulement	Montréal(06)	Montréal (66 )	2	0	0	0	0	0	0	0	0	0	0	0	0
SPVM _ 2012 _ 10235	MA	2012/10/02	66023	4000			BD LASALLE						11	2	3		21		11							11	2	0	0	0	21:00:00-21:59:00	2012	0	Dommages matériels inférieurs au seuil de rapportage	Montréal(06)	Montréal (66 )	1	0	0	0	0	0	0	0	0	0	0	0	1
SPVM _ 2012 _ 10236	JE	2012/10/04	66023	130			PL DU SOLEIL				31		12	1	2		14		11	34		1				14	2	0	0	0	Non précisé	2012	0	Dommages matériels inférieurs au seuil de rapportage	Montréal(06)	Montréal (66 )	1	0	0	0	0	0	0	0	0	0	0	0	1
SPVM _ 2012 _ 10237	SA	2012/10/06	66023				3E AV	1	WELLINGTON	30	32		12	1	2		14	1	11	33	6	1			N	11	1	0	0	1	13:00:00-13:59:00	2012	1	Léger	Montréal(06)	Montréal (66 )	1	0	0	0	0	0	0	0	0	0	0	0	0
SPVM _ 2012 _ 10238	DI	2012/10/07	66023				MANNING	1	BEURLING	5	32		11	3	2		14	1	11	32	7	2			S	12	1	0	0	1	03:00:00-03:59:00	2012	1	Léger	Montréal(06)	Montréal (66 )	1	0	0	0	0	0	0	0	0	0	0	0	0
SPVM _ 2012 _ 10239	DI	2012/10/07	66023	50			TROY				59		11	1	2		21		13	99		9				11	1	0	0	0	14:00:00-14:59:00	2012	0	Dommages matériels seulement	Montréal(06)	Montréal (66 )	1	0	0	0	0	0	0	0	0	0	0	0	0
SPVM _ 2012 _ 1024	SA	2012/10/27	66142	179			SPRING GARDEN	2	FACE A L ADRESSE		31		11	1	2		14		11	34		2				12	2	0	0	0	13:00:00-13:59:00	2012	0	Dommages matériels inférieurs au seuil de rapportage	Montréal(06)	Montréal (66 )	2	0	0	0	0	0	0	0	0	0	0	0	0
SPVM _ 2012 _ 10240	MA	2012/10/09	66023	3000			WELLINGTON						11	3	3		21		11	99		9				11	2	0	0	0	18:00:00-18:59:00	2012	0	Dommages matériels inférieurs au seuil de rapportage	Montréal(06)	Montréal (66 )	1	0	0	0	0	0	0	0	0	0	0	0	1
SPVM _ 2012 _ 10241	ME	2012/10/10	66023				LASALLE	1	HICKSON		32		12	1	2		13	1	11	32	6	2				12	2	0	0	3	15:00:00-15:59:00	2012	3	Léger	Montréal(06)	Montréal (66 )	2	0	0	0	0	0	0	0	0	0	0	0	0
SPVM _ 2012 _ 10242	ME	2012/10/10	66023				BANANNTYNE		ROLLAND		31		12	1	2		14	1	11	32		2				14	2	0	0	2	14:00:00-14:59:00	2012	2	Léger	Montréal(06)	Montréal (66 )	2	0	0	0	0	0	0	0	0	0	0	0	0
SPVM _ 2012 _ 10243	JE	2012/10/11	66023				MELROSE	2	CHAMPLAIN		31		11	1	2		14		11	99		1				11	2	0	0	0	Non précisé	2012	0	Dommages matériels seulement	Montréal(06)	Montréal (66 )	1	0	0	0	0	0	0	0	0	0	0	0	1
SPVM _ 2012 _ 10244	VE	2012/10/12	66023	756			RIELLE	1	BANNANTYNE		31		11	1	2		14		11	34		1				11	2	0	0	0	08:00:00-08:59:00	2012	0	Dommages matériels seulement	Montréal(06)	Montréal (66 )	1	1	0	0	0	0	0	0	0	0	0	0	0
SPVM _ 2012 _ 10245	LU	2012/10/15	66023	4061			WELLINGTON				32		11	1	3		13	1	11	33	7	2				12	1	0	0	1	12:00:00-12:59:00	2012	1	Léger	Montréal(06)	Montréal (66 )	1	0	0	0	0	0	0	0	0	0	0	0	0
SPVM _ 2012 _ 10246	LU	2012/10/15	66023				WOODLAND	1	VERDUN		32		11	1	2		13		11	32		2				11	1	0	0	1	12:00:00-12:59:00	2012	1	Léger	Montréal(06)	Montréal (66 )	0	0	0	0	0	0	0	1	0	0	0	0	0
SPVM _ 2012 _ 10247	LU	2012/10/15	66023	740			EGAN	1	VERDUN	50	31				2		14		11	34		1			N		2	0	0	0	Non précisé	2012	0	Dommages matériels inférieurs au seuil de rapportage	Montréal(06)	Montréal (66 )	0	0	0	0	0	0	1	0	0	0	0	0	1
SPVM _ 2012 _ 10248	LU	2012/10/15	66023				OSBORNE	1	DE VERUDN		31		11	3	2		14		11	32		2				11	2	0	0	0	18:00:00-18:59:00	2012	0	Dommages matériels seulement	Montréal(06)	Montréal (66 )	1	0	0	0	0	0	0	1	0	0	0	0	0
SPVM _ 2012 _ 10249	ME	2012/10/17	66023				CRAWFORD	1	CHAMPLAIN		31		11	1	2		14		11	32		3	1			11	2	0	0	0	11:00:00-11:59:00	2012	0	Dommages matériels seulement	Montréal(06)	Montréal (66 )	1	1	0	0	0	0	0	0	0	0	0	0	0
SPVM _ 2012 _ 1025	SA	2012/10/27	66142	3704			ST JEAN				31		11	1	3		21		11	40		9				12	2	0	0	0	Non précisé	2012	0	Dommages matériels inférieurs au seuil de rapportage	Montréal(06)	Montréal (66 )	1	0	0	0	0	0	0	0	0	0	0	0	1
SPVM _ 2012 _ 10250	ME	2012/10/17	66023	3000			WELLINGTON	2	STAT		31		11	1	3		21		11	40		9				11	2	0	0	0	10:00:00-10:59:00	2012	0	Dommages matériels inférieurs au seuil de rapportage	Montréal(06)	Montréal (66 )	1	0	0	0	0	0	0	0	0	0	0	0	1
SPVM _ 2012 _ 10251	VE	2012/10/19	66023	3916			WELLINGTON	1	HICKSON	25	31		12	3	3		13		11	33		2	2		S	15	2	0	0	0	19:00:00-19:59:00	2012	0	Dommages matériels inférieurs au seuil de rapportage	Montréal(06)	Montréal (66 )	2	0	0	0	0	0	0	0	0	0	0	0	0
SPVM _ 2012 _ 10252	DI	2012/10/21	66023	30			BERLIOZ				31		11	1	2		21		11	99						11	2	0	0	0	12:00:00-12:59:00	2012	0	Dommages matériels seulement	Montréal(06)	Montréal (66 )	1	0	0	0	0	0	0	0	0	0	0	0	1
SPVM _ 2012 _ 10253	DI	2012/10/21	66023	182			WILLIBROD								2		14		11	34		1					2	0	0	0	Non précisé	2012	0	Dommages matériels inférieurs au seuil de rapportage	Montréal(06)	Montréal (66 )	1	0	0	0	0	0	0	0	0	0	0	0	1
SPVM _ 2012 _ 10254	DI	2012/10/21	66023	3862			VERDUN	1	HICKSON	50	31		11	3	2		13		11	34		2			E	12	4	0	0	0	18:00:00-18:59:00	2012	0	Dommages matériels seulement	Montréal(06)	Montréal (66 )	4	0	0	0	0	0	0	0	0	0	0	0	0
SPVM _ 2012 _ 10255	LU	2012/10/22	66023				ILE DES SOEURS	1	CH DU GOLF	5	31		11	1	2		13		11	31		1	1		O	11	2	0	0	0	17:00:00-17:59:00	2012	0	Dommages matériels seulement	Montréal(06)	Montréal (66 )	2	0	0	0	0	0	0	0	0	0	0	0	0
SPVM _ 2012 _ 10256	DI	2012/10/21	66023				GIBBONS	2	FACE AU 552		31				2		14		11								2	0	0	0	18:00:00-18:59:00	2012	0	Dommages matériels inférieurs au seuil de rapportage	Montréal(06)	Montréal (66 )	1	0	0	0	0	0	0	0	0	0	0	0	1
SPVM _ 2012 _ 10257	LU	2012/10/22	66023				BANNANTYNE		DE L EGLISE	50	32		11	3	3		13	1	11	33	6	2			E	11	1	0	0	1	21:00:00-21:59:00	2012	1	Léger	Montréal(06)	Montréal (66 )	1	0	0	0	0	0	0	0	0	0	0	0	0
SPVM _ 2012 _ 10258	SA	2012/10/20	66023	780			FACE 1RE AV	1	BANNANTYNE	300	31		12	3	2		14		11	33		1			S	15	2	0	0	0	Non précisé	2012	0	Dommages matériels inférieurs au seuil de rapportage	Montréal(06)	Montréal (66 )	1	0	0	0	0	0	0	0	0	0	0	0	1
SPVM _ 2012 _ 10259	MA	2012/10/23	66023	3949			BD LASALLE				31		11	1	2		14		11	34		2				11	2	0	0	0	16:00:00-16:59:00	2012	0	Dommages matériels inférieurs au seuil de rapportage	Montréal(06)	Montréal (66 )	2	0	0	0	0	0	0	0	0	0	0	0	0
SPVM _ 2012 _ 1026	SA	2012/10/27	66142	4301			ST JEAN	1	ROGER PILON		31		11	1	3		21		11	40						12	2	0	0	0	Non précisé	2012	0	Dommages matériels inférieurs au seuil de rapportage	Montréal(06)	Montréal (66 )	1	0	0	0	0	0	0	0	0	0	0	0	1
SPVM _ 2012 _ 10260	SA	2012/10/20	66023					2	FACE A L ADRESSE		31			1	3		13		11			2			O		2	0	0	0	13:00:00-13:59:00	2012	0	Dommages matériels inférieurs au seuil de rapportage	Montréal(06)	Montréal (66 )	1	0	0	0	0	0	0	1	0	0	0	0	0
SPVM _ 2012 _ 10261	JE	2012/10/25	66023	982			DESMARCHAIS	1	BANNANTYNE	25	31		11	1	2		14		11	34		1			N	11	2	0	0	0	12:00:00-12:59:00	2012	0	Dommages matériels seulement	Montréal(06)	Montréal (66 )	1	0	0	0	0	0	0	0	0	0	0	0	1
SPVM _ 2012 _ 10262	VE	2012/10/26	66023	920			MOFFAT	1	BANNANTYNE	35	31		11	1	2		14		11	34		1			N	11	2	0	0	0	10:00:00-10:59:00	2012	0	Dommages matériels inférieurs au seuil de rapportage	Montréal(06)	Montréal (66 )	1	0	0	0	0	0	0	0	0	0	0	0	1
SPVM _ 2012 _ 10263	SA	2012/10/27	66023								31		11	3	2		14		11	32		2				11	2	0	0	0	03:00:00-03:59:00	2012	0	Dommages matériels seulement	Montréal(06)	Montréal (66 )	1	0	0	0	0	0	0	1	0	0	0	0	0
SPVM _ 2012 _ 10264	LU	2012/10/29	66023	615			DE L EGLISE				31		11	1	2		13		11	34		1				12	2	0	0	0	Non précisé	2012	0	Dommages matériels inférieurs au seuil de rapportage	Montréal(06)	Montréal (66 )	1	0	0	0	0	0	0	0	0	0	0	0	1
SPVM _ 2012 _ 10265	LU	2012/10/29	66023	155			DES PASSEREAUX						11	1	2		14		11	34					N	12	2	0	0	0	12:00:00-12:59:00	2012	0	Dommages matériels inférieurs au seuil de rapportage	Montréal(06)	Montréal (66 )	1	0	0	0	0	0	0	0	0	0	0	0	1
SPVM _ 2012 _ 10266	MA	2012/10/30	66023				HICKSON	1	ALLEN		32		11	1	2		14	1	11	32	6	1				12	1	0	0	0	08:00:00-08:59:00	2012	0	Dommages matériels inférieurs au seuil de rapportage	Montréal(06)	Montréal (66 )	1	0	0	0	0	0	0	0	0	0	0	0	0
SPVM _ 2012 _ 10267	VE	2012/10/26	66023	1300			CH DU GOLF FACE				31		11	1	3		14		11	33		5				11	2	0	0	0	08:00:00-08:59:00	2012	0	Dommages matériels inférieurs au seuil de rapportage	Montréal(06)	Montréal (66 )	2	0	0	0	0	0	0	0	0	0	0	0	0
SPVM _ 2012 _ 10268	ME	2012/10/31	66023	3785			WELLINGTON		VERDON		31		12	1	3		13		11			2				14	2	0	0	0	11:00:00-11:59:00	2012	0	Dommages matériels seulement	Montréal(06)	Montréal (66 )	1	1	0	0	0	0	0	0	0	0	0	0	0
SPVM _ 2012 _ 10269	ME	2012/10/31	66023	675			1RE AV	1	DE VERDUN	100	31		12	1	2		14		11	34		1			S	12	2	0	0	0	14:00:00-14:59:00	2012	0	Dommages matériels inférieurs au seuil de rapportage	Montréal(06)	Montréal (66 )	2	0	0	0	0	0	0	0	0	0	0	0	0
SPVM _ 2012 _ 1027	DI	2012/10/28	66142	4289			ST JEAN						11		3		21		11	40						11	2	0	0	0	Non précisé	2012	0	Dommages matériels inférieurs au seuil de rapportage	Montréal(06)	Montréal (66 )	1	0	0	0	0	0	0	0	0	0	0	0	1
SPVM _ 2012 _ 10270	MA	2012/10/30	66023				DE LA POUDRIERE	1	HENRI DUHAMEL	100	31		11	1	2		14		21	34		1			S	11	2	0	0	0	19:00:00-19:59:00	2012	0	Dommages matériels inférieurs au seuil de rapportage	Montréal(06)	Montréal (66 )	1	0	0	0	0	0	0	0	0	0	0	1	0
SPVM _ 2012 _ 10271	JE	2012/11/01	66023	486			REGINA				31		12		2		14		11	33		2				12	2	0	0	0	00:00:00-00:59:00	2012	0	Dommages matériels inférieurs au seuil de rapportage	Montréal(06)	Montréal (66 )	2	0	0	0	0	0	0	0	0	0	0	0	0
SPVM _ 2012 _ 10272	JE	2012/11/01	66023	5144			BANNANTYNE	2	STAT	5	31		12	3	3		21		11	32		9			E	14	2	0	0	0	20:00:00-20:59:00	2012	0	Dommages matériels inférieurs au seuil de rapportage	Montréal(06)	Montréal (66 )	2	0	0	0	0	0	0	0	0	0	0	0	0
SPVM _ 2012 _ 10273	SA	2012/11/03	66023					1	RENE LEVESQUE	5	31		12	2	3		13	1	11	32	6	3			O	14	2	0	0	1	13:00:00-13:59:00	2012	1	Léger	Montréal(06)	Montréal (66 )	2	0	0	0	0	0	0	0	0	0	0	0	0
SPVM _ 2012 _ 10274	VE	2012/11/02	66023				CHAMPLAIN	1	WOODLAND	25	72	2	12	1	2		13		11	33		2	1		N	14	1	0	0	0	14:00:00-14:59:00	2012	0	Dommages matériels seulement	Montréal(06)	Montréal (66 )	0	1	0	0	0	0	0	0	0	0	0	0	0
SPVM _ 2012 _ 10275	ME	2012/10/31	66023				HICKSON	1	ETHEL	15			12	3	2		14		11	33		1			S	11	2	0	0	0	16:00:00-16:59:00	2012	0	Dommages matériels inférieurs au seuil de rapportage	Montréal(06)	Montréal (66 )	1	0	0	0	0	0	0	0	0	0	0	0	1
SPVM _ 2012 _ 10276	SA	2012/11/03	66023	765			2E AV				31			4	2		14		11			1					2	0	0	0	00:00:00-00:59:00	2012	0	Dommages matériels inférieurs au seuil de rapportage	Montréal(06)	Montréal (66 )	2	0	0	0	0	0	0	0	0	0	0	0	0
SPVM _ 2012 _ 10277	SA	2012/11/03	66023					1	LASALLE ET 1RE AV VERDUN		31		11	2	2		14		11	32		1				12	2	0	0	0	19:00:00-19:59:00	2012	0	Dommages matériels seulement	Montréal(06)	Montréal (66 )	2	0	0	0	0	0	0	0	0	0	0	0	0
SPVM _ 2012 _ 10278	SA	2012/11/03	66023	4025			WELLINGTON		EGLISE	30			12	1	3		13		11	34		2			E	14	2	0	0	0	12:00:00-12:59:00	2012	0	Dommages matériels seulement	Montréal(06)	Montréal (66 )	1	0	0	0	0	0	0	0	0	0	0	0	1
SPVM _ 2012 _ 10279	VE	2012/11/02	66023	100			PTE N				31				9		21		11			9					2	0	0	0	Non précisé	2012	0	Dommages matériels inférieurs au seuil de rapportage	Montréal(06)	Montréal (66 )	1	0	0	0	0	0	0	0	0	0	0	0	1
SPVM _ 2012 _ 1028	LU	2012/10/29	66142				WESTMINSTER	1	BD ST JEAN		32		11	1	3		13	1	11	32	4	1			O	12	1	0	0	1	14:00:00-14:59:00	2012	1	Léger	Montréal(06)	Montréal (66 )	1	0	0	0	0	0	0	0	0	0	0	0	0
SPVM _ 2012 _ 10280	LU	2012/11/05	66023				LASALLE	1	HICKSON		31		11	1	2		13		11	32		2				11	2	0	0	0	15:00:00-15:59:00	2012	0	Dommages matériels seulement	Montréal(06)	Montréal (66 )	2	0	0	0	0	0	0	0	0	0	0	0	0
SPVM _ 2012 _ 10281	DI	2012/11/04	66023				BD ILE DES SOEURS						11	3	2		13		11	34		2				11	2	0	0	0	19:00:00-19:59:00	2012	0	Dommages matériels inférieurs au seuil de rapportage	Montréal(06)	Montréal (66 )	1	0	0	0	0	0	0	0	0	0	0	0	1
SPVM _ 2012 _ 10282	LU	2012/11/05	66023					1	CHAMPLAIN ET EGLISE		31		11	3	3		13		11							11	2	0	0	0	22:00:00-22:59:00	2012	0	Dommages matériels inférieurs au seuil de rapportage	Montréal(06)	Montréal (66 )	1	0	0	0	0	0	0	1	0	0	0	0	0
SPVM _ 2012 _ 10283	LU	2012/11/05	66023				BANNANTYNE	1	1RE AV		31		11	1	2		13		11	32		3			E	11	2	0	0	0	13:00:00-13:59:00	2012	0	Dommages matériels inférieurs au seuil de rapportage	Montréal(06)	Montréal (66 )	2	0	0	0	0	0	0	0	0	0	0	0	0
SPVM _ 2012 _ 10284	ME	2012/11/07	66023				BANNANTYNE	1	WOODLAND		32		11	1	2		14	1	11	32	6	2				11	1	0	0	1	07:00:00-07:59:00	2012	1	Léger	Montréal(06)	Montréal (66 )	1	0	0	0	0	0	0	0	0	0	0	0	0
SPVM _ 2012 _ 10285	VE	2012/11/02	66023				PL DU COMMERCE	1	BERLIOZ		31		11	1	3		13		21	32		3				11	2	0	0	0	13:00:00-13:59:00	2012	0	Dommages matériels inférieurs au seuil de rapportage	Montréal(06)	Montréal (66 )	2	0	0	0	0	0	0	0	0	0	0	0	0
SPVM _ 2012 _ 10286	MA	2012/11/06	66023	3000			WELLINGTON				31		11	1	3		21		11	40						11	2	0	0	0	14:00:00-14:59:00	2012	0	Dommages matériels inférieurs au seuil de rapportage	Montréal(06)	Montréal (66 )	1	0	0	0	0	0	0	0	0	0	0	0	1
SPVM _ 2012 _ 10287	ME	2012/11/07	66023				MOFFAT	1	BANNANTYNE		31	1	11	3	2		14	2	11	32	6	1	2		E	11	2	0	0	0	17:00:00-17:59:00	2012	0	Dommages matériels seulement	Montréal(06)	Montréal (66 )	2	0	0	0	0	0	0	0	0	0	0	0	0
SPVM _ 2012 _ 10288	SA	2012/11/03	66023	4050			WELLINGTON				31		11	1	3		13		11	34		2				11	2	0	0	0	15:00:00-15:59:00	2012	0	Dommages matériels seulement	Montréal(06)	Montréal (66 )	2	0	0	0	0	0	0	0	0	0	0	0	0
SPVM _ 2012 _ 10289	JE	2012/11/08	66023	1470			ROLLAND				31	9	11	1	2		12		11	99		9				11	2	0	0	0	14:00:00-14:59:00	2012	0	Dommages matériels inférieurs au seuil de rapportage	Montréal(06)	Montréal (66 )	1	0	0	0	0	0	0	0	0	0	0	0	1
SPVM _ 2012 _ 1029	LU	2012/10/29	66142	1079			WOODSIDE				31		12	1	2		14		11	34		1				15	2	0	0	0	Non précisé	2012	0	Dommages matériels seulement	Montréal(06)	Montréal (66 )	1	0	0	0	0	0	0	0	0	0	0	0	1
SPVM _ 2012 _ 10290	ME	2012/07/25	66023				VERDUN	1	5E AV		32		11	3	3		13	1	11	32		2				12	1	0	0	1	22:00:00-22:59:00	2012	1	Léger	Montréal(06)	Montréal (66 )	1	0	0	0	0	0	0	0	0	0	0	0	0
SPVM _ 2012 _ 10291	VE	2012/11/09	66023	3079			WELLINGTON				31		11	3	3		13		11	34		2				11	2	0	0	0	18:00:00-18:59:00	2012	0	Dommages matériels inférieurs au seuil de rapportage	Montréal(06)	Montréal (66 )	2	0	0	0	0	0	0	0	0	0	0	0	0
SPVM _ 2012 _ 10292	LU	2012/11/12	66023	1100			5E AV	1	CHAMPLAIN	10	31		11	1	1		21		11	34		9			O	11	2	0	0	0	15:00:00-15:59:00	2012	0	Dommages matériels inférieurs au seuil de rapportage	Montréal(06)	Montréal (66 )	1	0	0	0	0	0	0	0	0	0	0	1	0
SPVM _ 2012 _ 10293	LU	2012/11/12	66023	368			WELLIBRORD				31		11	1	2		21		11	99						11	2	0	0	0	08:00:00-08:59:00	2012	0	Dommages matériels seulement	Montréal(06)	Montréal (66 )	1	0	0	0	0	0	0	0	0	0	0	0	1
SPVM _ 2012 _ 10294	LU	2012/11/12	66023				GAETAN LABERGE	1	GILBERTE DUBE		31		13	1	3		11		11	31						11	2	0	0	0	20:00:00-20:59:00	2012	0	Dommages matériels inférieurs au seuil de rapportage	Montréal(06)	Montréal (66 )	2	0	0	0	0	0	0	0	0	0	0	0	0
SPVM _ 2012 _ 10295	MA	2012/11/13	66023	5053			VERDUN				31		11	1	1		13		11	34						11	2	0	0	0	16:00:00-16:59:00	2012	0	Dommages matériels inférieurs au seuil de rapportage	Montréal(06)	Montréal (66 )	2	0	0	0	0	0	0	0	0	0	0	0	0
SPVM _ 2012 _ 10296	MA	2012/11/13	66023				BANNANTYNE	1	GODIN		52		11	3	2		14		11	32		2				11	1	0	0	0	19:00:00-19:59:00	2012	0	Dommages matériels seulement	Montréal(06)	Montréal (66 )	1	0	0	0	0	0	0	0	0	0	0	0	0
SPVM _ 2012 _ 10297	MA	2012/11/13	66023				CLAUDE	1	DE L EGLISE	100	31		11	1	2		14		11	34		1	2			11	2	0	0	0	09:00:00-09:59:00	2012	0	Dommages matériels inférieurs au seuil de rapportage	Montréal(06)	Montréal (66 )	1	0	0	0	0	0	0	0	0	0	0	0	1
SPVM _ 2012 _ 10298	VE	2012/11/16	66023	4211			WELLINGTON				31		11	3	3		13		11	32		2				11	2	0	0	0	19:00:00-19:59:00	2012	0	Dommages matériels inférieurs au seuil de rapportage	Montréal(06)	Montréal (66 )	0	0	0	1	0	0	0	0	1	0	0	0	0
SPVM _ 2012 _ 10299	SA	2012/11/17	66023				WELLINGTON	1	DE L EGLISE	1	31		11	3	3		13		11	32		2				11	2	0	0	0	18:00:00-18:59:00	2012	0	Dommages matériels inférieurs au seuil de rapportage	Montréal(06)	Montréal (66 )	2	0	0	0	0	0	0	0	0	0	0	0	0
SPVM _ 2012 _ 103	SA	2012/02/25	66023	127			PIERRE PANET				31		17	3	2		14		11	32		2				11	2	0	0	0	23:00:00-23:59:00	2012	0	Dommages matériels inférieurs au seuil de rapportage	Montréal(06)	Montréal (66 )	1	0	0	0	0	0	0	0	1	0	0	0	0
SPVM _ 2012 _ 1030	SA	2012/10/20	66142	1			HOTEL DE VILLE	1	BRUNSWICK		31		11	1	3		21		11	33		2				11	2	0	0	0	Non précisé	2012	0	Dommages matériels inférieurs au seuil de rapportage	Montréal(06)	Montréal (66 )	1	0	0	0	0	0	0	0	0	0	0	0	1
SPVM _ 2012 _ 10300	DI	2012/11/18	66023				2E AV		WELLINGTON	15			11	3	2		14		11	33		1			S	11	2	0	0	0	04:00:00-04:59:00	2012	0	Dommages matériels inférieurs au seuil de rapportage	Montréal(06)	Montréal (66 )	2	0	0	0	0	0	0	0	0	0	0	0	0
SPVM _ 2012 _ 10301	DI	2012/11/18	66023	605			GODIN				31		11	1	2		14		11	34		1				11	2	0	0	0	07:00:00-07:59:00	2012	0	Dommages matériels seulement	Montréal(06)	Montréal (66 )	2	0	0	0	0	0	0	0	0	0	0	0	0
SPVM _ 2012 _ 10302	LU	2012/11/19	66023	3000			BD RENE LEVESQUE				33		11	1	3		13		11	34	8	3				11	2	0	0	1	08:00:00-08:59:00	2012	1	Léger	Montréal(06)	Montréal (66 )	1	0	0	0	1	0	0	0	0	0	0	0	0
SPVM _ 2012 _ 10303	LU	2012/11/19	66023				WELLINGTON	1	RIELLE		31		11	1	3		13		11	32		2				11	2	0	0	0	10:00:00-10:59:00	2012	0	Dommages matériels seulement	Montréal(06)	Montréal (66 )	1	0	0	1	0	0	0	0	0	0	0	0	0
SPVM _ 2012 _ 10304	DI	2012/11/11	66023	760			4E AV				31				2		14		11			1					2	0	0	0	09:00:00-09:59:00	2012	0	Dommages matériels inférieurs au seuil de rapportage	Montréal(06)	Montréal (66 )	1	0	0	0	0	0	0	0	0	0	0	0	1
SPVM _ 2012 _ 10305	DI	2012/11/18	66023	1			PL DU COMMERCE		ILE DES SOEURS		31		11	1	3		21		11			9				11	2	0	0	0	Non précisé	2012	0	Dommages matériels inférieurs au seuil de rapportage	Montréal(06)	Montréal (66 )	1	0	0	0	0	0	0	0	0	0	0	0	1
SPVM _ 2012 _ 10306	MA	2012/11/20	66023	3010			GAETAN LABERGE						11	1	1		21		11	99		9				11	2	0	0	0	Non précisé	2012	0	Dommages matériels inférieurs au seuil de rapportage	Montréal(06)	Montréal (66 )	1	0	0	0	0	0	0	0	0	0	0	0	1
SPVM _ 2012 _ 10307	MA	2012/11/20	66023				VERDUN	1	DE L EGLISE	50	31		11	1	2		13		11	33		2			S	11	2	0	0	0	09:00:00-09:59:00	2012	0	Dommages matériels inférieurs au seuil de rapportage	Montréal(06)	Montréal (66 )	1	0	0	0	0	0	0	0	0	0	0	0	1
SPVM _ 2012 _ 10308	JE	2012/11/22	66023	3350			WELLINGTON						11	1	2		14		11	99		3				11	2	0	0	0	17:00:00-17:59:00	2012	0	Dommages matériels seulement	Montréal(06)	Montréal (66 )	2	0	0	0	0	0	0	0	0	0	0	0	0
SPVM _ 2012 _ 10309	SA	2012/11/24	66023	5511			DE VERDUN	1	WOODLAND	20	31		11	3	3		13		11	33		2			O	12	3	0	0	0	03:00:00-03:59:00	2012	0	Dommages matériels seulement	Montréal(06)	Montréal (66 )	3	0	0	0	0	0	0	0	0	0	0	0	0
SPVM _ 2012 _ 1031	MA	2012/10/30	66142	3400			DU MARCHE	2	F CLINIC FAMILIALE MEDICALE		31		12	1	3		21									14	2	0	0	0	Non précisé	2012	0	Dommages matériels inférieurs au seuil de rapportage	Montréal(06)	Montréal (66 )	1	0	0	0	0	0	0	0	0	0	0	0	1
SPVM _ 2012 _ 10310	SA	2012/11/24	66023	697			4E AV FACE	2	DE VERDUN	150	31		11	1	2		14		11	34		1			N	12	2	0	0	0	15:00:00-15:59:00	2012	0	Dommages matériels inférieurs au seuil de rapportage	Montréal(06)	Montréal (66 )	2	0	0	0	0	0	0	0	0	0	0	0	0
SPVM _ 2012 _ 10311	LU	2012/11/26	66023	3273			LASALLE	2	IMMEUBLE		31		11	1	2		22		11	99		9				11	2	0	0	0	Non précisé	2012	0	Dommages matériels inférieurs au seuil de rapportage	Montréal(06)	Montréal (66 )	1	0	0	0	0	0	0	0	0	0	0	0	1
SPVM _ 2012 _ 10312	MA	2012/11/27	66023				WELLINGTON	1	LASALLE		32		11	1	3		13	1	11	32	6	2				11	1	0	0	0	09:00:00-09:59:00	2012	0	Dommages matériels inférieurs au seuil de rapportage	Montréal(06)	Montréal (66 )	1	0	0	0	0	0	0	0	0	0	0	0	0
SPVM _ 2012 _ 10313	JE	2012/11/29	66023	3010			GAETAN LABERGE BD				31		18	1	2		21		21	99		2				12	2	0	0	0	12:00:00-12:59:00	2012	0	Dommages matériels seulement	Montréal(06)	Montréal (66 )	2	0	0	0	0	0	0	0	0	0	0	0	0
SPVM _ 2012 _ 10314	VE	2012/11/30	66023				GORDON	1	BANNANTYNE	5	32		11	1	2		14		11	32		1			S	11	1	0	0	0	10:00:00-10:59:00	2012	0	Dommages matériels inférieurs au seuil de rapportage	Montréal(06)	Montréal (66 )	1	0	0	0	0	0	0	0	0	0	0	0	0
SPVM _ 2012 _ 10315	VE	2012/11/30	66023						FACE AU 5551 WELLINGTON				11	2	2		14		11	32		2				11	3	0	0	0	18:00:00-18:59:00	2012	0	Dommages matériels inférieurs au seuil de rapportage	Montréal(06)	Montréal (66 )	3	0	0	0	0	0	0	0	0	0	0	0	0
SPVM _ 2012 _ 10316	ME	2012/11/28	66023	4400			BD CHAMPLAIN		RIELLE	50	31		11		3		14		11	34		2			O	11	2	0	0	0	21:00:00-21:59:00	2012	0	Dommages matériels inférieurs au seuil de rapportage	Montréal(06)	Montréal (66 )	1	0	0	0	0	0	0	0	0	0	0	0	1
SPVM _ 2012 _ 10317	DI	2012/12/02	66023				WELLINGTON	1	GALT	5	31		12	2	3		13		11	32		2			E	14	2	0	0	0	15:00:00-15:59:00	2012	0	Dommages matériels inférieurs au seuil de rapportage	Montréal(06)	Montréal (66 )	2	0	0	0	0	0	0	0	0	0	0	0	0
SPVM _ 2012 _ 10318	MA	2012/12/04	66023	770			4E AV	1	BANNANTYNE	100	31		12	1	2		14		11	34		1			S	11	2	0	0	0	12:00:00-12:59:00	2012	0	Dommages matériels inférieurs au seuil de rapportage	Montréal(06)	Montréal (66 )	1	0	0	0	0	0	0	0	1	0	0	0	0
SPVM _ 2012 _ 10319	MA	2012/12/04	66023				STRATHMORE	1	VERDUN		31		11	1	2		14	1	11	32	6	2				11	2	0	0	1	13:00:00-13:59:00	2012	1	Léger	Montréal(06)	Montréal (66 )	1	0	0	0	0	0	0	1	0	0	0	0	0
SPVM _ 2012 _ 1032	MA	2012/10/30	66023					1	FOUNTAIN ET DAVIGNON	30	31		11	1	2		14	1	11	33	6	2			S	11	2	0	0	0	16:00:00-16:59:00	2012	0	Dommages matériels seulement	Montréal(06)	Montréal (66 )	2	0	0	0	0	0	0	0	0	0	0	0	0
SPVM _ 2012 _ 10320	SA	2012/12/01	66023	3946			LESAGE	1	HICKSON	100	99	9	11	3	2		14	1	11	34	6	2			O	12	1	0	0	1	03:00:00-03:59:00	2012	1	Léger	Montréal(06)	Montréal (66 )	1	0	0	0	0	0	0	0	0	0	0	0	0
SPVM _ 2012 _ 10321	ME	2012/12/05	66023	4050			WELLINGTON				31		11	1	3		13		11	34		2				11	2	0	0	0	10:00:00-10:59:00	2012	0	Dommages matériels seulement	Montréal(06)	Montréal (66 )	2	0	0	0	0	0	0	0	0	0	0	0	0
SPVM _ 2012 _ 10322	JE	2012/12/06	66023				CHAMPLAIN	1	OSBORNE	10	31		11	3	2		14	1	11	32	6	2			S	11	2	0	0	1	19:00:00-19:59:00	2012	1	Léger	Montréal(06)	Montréal (66 )	2	0	0	0	0	0	0	0	0	0	0	0	0
SPVM _ 2012 _ 10323	VE	2012/12/07	66023	503			5IEME AV	1	DE VERDUN	15	31		11	3	1		14		11	33		1			S	12	2	0	0	0	02:00:00-02:59:00	2012	0	Dommages matériels seulement	Montréal(06)	Montréal (66 )	2	0	0	0	0	0	0	0	0	0	0	0	0
SPVM _ 2012 _ 10324	VE	2012/12/07	66023				DE VERDUN	1	6E AV		31		11	1	1		13	1	11	32	6	2				11	2	0	0	3	15:00:00-15:59:00	2012	3	Léger	Montréal(06)	Montréal (66 )	2	0	0	0	0	0	0	0	0	0	0	0	0
SPVM _ 2012 _ 10325	SA	2012/12/08	66023	65			CH DE LA PTE S	1	L OREE DU BOIS	5	31		12	3	2		14		11	32		2			S	12	3	0	0	0	03:00:00-03:59:00	2012	0	Dommages matériels seulement	Montréal(06)	Montréal (66 )	3	0	0	0	0	0	0	0	0	0	0	0	0
SPVM _ 2012 _ 10326	JE	2012/12/06	66023				LASALLE	1	EGLISE		31		11	3	3		13		11	32		2				11	2	0	0	0	Non précisé	2012	0	Dommages matériels seulement	Montréal(06)	Montréal (66 )	1	0	0	0	0	0	0	0	0	0	0	0	1
SPVM _ 2012 _ 10327	DI	2012/12/09	66023	4155			WELLINGTON				31		12	2	1		21		11	99						12	2	0	0	0	Non précisé	2012	0	Dommages matériels seulement	Montréal(06)	Montréal (66 )	2	0	0	0	0	0	0	0	0	0	0	0	0
SPVM _ 2012 _ 10328	LU	2012/12/10	66023	30			DE L EGLISE						15	1	3		21		11	40						14	2	0	0	0	Non précisé	2012	0	Dommages matériels inférieurs au seuil de rapportage	Montréal(06)	Montréal (66 )	1	0	0	0	0	0	0	0	0	0	0	0	1
SPVM _ 2012 _ 10329	DI	2012/12/09	66023	1143			6E AV FACE				31	3	15		2		14		11	33		1				17	2	0	0	0	Non précisé	2012	0	Dommages matériels inférieurs au seuil de rapportage	Montréal(06)	Montréal (66 )	1	0	1	0	0	0	0	0	0	0	0	0	0
SPVM _ 2012 _ 1033	LU	2012/10/29	66142	3237			DES SOURCES				31		11	3	3		21		11	40		9				11	2	0	0	0	Non précisé	2012	0	Dommages matériels seulement	Montréal(06)	Montréal (66 )	1	0	0	0	0	0	0	0	0	0	0	0	1
SPVM _ 2012 _ 10330	MA	2012/12/11	66023	351			REGINA	2			31		12	2	2		14		11	34		2			N	12	2	0	0	0	07:00:00-07:59:00	2012	0	Dommages matériels inférieurs au seuil de rapportage	Montréal(06)	Montréal (66 )	2	0	0	0	0	0	0	0	0	0	0	0	0
SPVM _ 2012 _ 10331	MA	2012/12/11	66023	530			DE GASPE				32		18	1	1		14	1	11	31		1				11	1	0	0	1	08:00:00-08:59:00	2012	1	Léger	Montréal(06)	Montréal (66 )	1	0	0	0	0	0	0	0	0	0	0	0	0
SPVM _ 2012 _ 10332	MA	2012/12/11	66023	450			CH DU GOLF				31		18	1	3		21		11							11	2	0	0	0	09:00:00-09:59:00	2012	0	Dommages matériels seulement	Montréal(06)	Montréal (66 )	2	0	0	0	0	0	0	0	0	0	0	0	0
SPVM _ 2012 _ 10333	LU	2012/12/10	66023				EGAN		VERDUN	5	31		15	3	2		14		11	33		1			E	14	2	0	0	0	20:00:00-20:59:00	2012	0	Dommages matériels inférieurs au seuil de rapportage	Montréal(06)	Montréal (66 )	1	0	0	0	0	0	0	0	0	0	0	0	1
SPVM _ 2012 _ 10334	MA	2012/12/11	66023	3855			WELLINGTON	1	HICKSON	225	31		11	1	3		13		11	33		1			N	11	2	0	0	0	Non précisé	2012	0	Dommages matériels inférieurs au seuil de rapportage	Montréal(06)	Montréal (66 )	1	0	0	0	0	0	0	0	0	0	0	0	1
SPVM _ 2012 _ 10335	MA	2012/12/11	66023	30			PL DU COMMERCE				32		11	3	3		21	1	11	40	9	1				11	1	0	0	2	16:00:00-16:59:00	2012	2	Léger	Montréal(06)	Montréal (66 )	1	0	0	0	0	0	0	0	0	0	0	0	0
SPVM _ 2012 _ 10336	ME	2012/12/12	66023				ATWATER	1	HENRI DUHAMEL	15	31		11	3	4		11		11	38		5			N	11	2	0	0	0	03:00:00-03:59:00	2012	0	Dommages matériels seulement	Montréal(06)	Montréal (66 )	2	0	0	0	0	0	0	0	0	0	0	0	0
SPVM _ 2012 _ 10337	ME	2012/11/28	66023	242			DE LA POUDRIERE				31		11		2		21		11							11	1	0	0	0	Non précisé	2012	0	Dommages matériels inférieurs au seuil de rapportage	Montréal(06)	Montréal (66 )	1	0	0	0	0	0	0	0	0	0	0	0	0
SPVM _ 2012 _ 10338	ME	2012/12/12	66023				DE VERDUN	1	EGAN		31		11	1	2		14		11	32		2				11	2	0	0	0	10:00:00-10:59:00	2012	0	Dommages matériels seulement	Montréal(06)	Montréal (66 )	2	0	0	0	0	0	0	0	0	0	0	0	0
SPVM _ 2012 _ 10339	ME	2012/12/12	66023				BD ILE DES SOEURS	1	PL DU COMMERCE		32		11	1	2		13		11	31		5	2			11	1	0	0	1	13:00:00-13:59:00	2012	1	Léger	Montréal(06)	Montréal (66 )	1	0	0	0	0	0	0	0	0	0	0	0	0
SPVM _ 2012 _ 1034	JE	2012/11/01	66142	3708			BD ST JEAN				31		12	3	3		21		11	40		9				14	2	0	0	0	18:00:00-18:59:00	2012	0	Dommages matériels inférieurs au seuil de rapportage	Montréal(06)	Montréal (66 )	2	0	0	0	0	0	0	0	0	0	0	0	0
SPVM _ 2012 _ 10340	ME	2012/12/12	66023					1	3E AV ET VERDUN		31		16	3	2		14		11	33		1				17	2	0	0	0	19:00:00-19:59:00	2012	0	Dommages matériels inférieurs au seuil de rapportage	Montréal(06)	Montréal (66 )	2	0	0	0	0	0	0	0	0	0	0	0	0
SPVM _ 2012 _ 10341	JE	2012/12/13	66023	801			MARIE LE BEC PRES DE CE				31		12	1	2		14		11	34		2			E	11	2	0	0	0	08:00:00-08:59:00	2012	0	Dommages matériels seulement	Montréal(06)	Montréal (66 )	2	0	0	0	0	0	0	0	0	0	0	0	0
SPVM _ 2012 _ 10342	ME	2012/12/12	66023	2			PL DES JARDINS DES VOSGES	1	PTE S		31		12	3	2		14		11	33		2				11	2	0	0	0	20:00:00-20:59:00	2012	0	Dommages matériels inférieurs au seuil de rapportage	Montréal(06)	Montréal (66 )	1	0	0	0	0	0	0	0	0	0	0	0	1
SPVM _ 2012 _ 10343	JE	2012/12/13	66023				CHAMPLAIN	1	LECLAIR	500	31		12	2	9		19		11	33		3			O	11	4	0	0	0	16:00:00-16:59:00	2012	0	Dommages matériels seulement	Montréal(06)	Montréal (66 )	3	0	0	0	0	0	0	0	0	0	0	0	1
SPVM _ 2012 _ 10344	VE	2012/12/14	66023				GALT	1	WELLINGTON		32		12	3	3		14		11	32		1				12	1	0	0	1	06:00:00-06:59:00	2012	1	Léger	Montréal(06)	Montréal (66 )	1	0	0	0	0	0	0	0	0	0	0	0	0
SPVM _ 2012 _ 10345	DI	2012/12/16	66023	30			PL DU COMMERCE				31		12	1	3		21									12	2	0	0	0	11:00:00-11:59:00	2012	0	Dommages matériels inférieurs au seuil de rapportage	Montréal(06)	Montréal (66 )	1	0	0	0	0	0	0	0	0	0	0	0	1
SPVM _ 2012 _ 10346	MA	2012/12/18	66023				CHAMPLAIN	1	DE L EGLISE		31		13	2	3		14	1	11	32	6	3				14	2	0	0	1	18:00:00-18:59:00	2012	1	Léger	Montréal(06)	Montréal (66 )	2	0	0	0	0	0	0	0	0	0	0	0	0
SPVM _ 2012 _ 10347	MA	2012/12/18	66023	642			DE L EGLISE FACE AU	1	JOSEPH	15	31		16	3	2		14		11	33		1			S	14	2	0	0	0	14:00:00-14:59:00	2012	0	Dommages matériels seulement	Montréal(06)	Montréal (66 )	1	0	0	0	0	0	0	0	0	0	0	0	1
SPVM _ 2012 _ 10348	MA	2012/12/18	66023				WILLIBRORD	1	VERDUN	20	31		15	1	2		14		11	33		1			S	14	2	0	0	0	Non précisé	2012	0	Dommages matériels inférieurs au seuil de rapportage	Montréal(06)	Montréal (66 )	1	0	0	0	0	0	0	0	0	0	0	0	1
SPVM _ 2012 _ 10349	ME	2012/12/19	66023	1197			VALIQUETTE	1	BEURLING	100	31		16	3	2		14		11	34		1			S	11	2	0	0	0	22:00:00-22:59:00	2012	0	Dommages matériels seulement	Montréal(06)	Montréal (66 )	2	0	0	0	0	0	0	0	0	0	0	0	0
SPVM _ 2012 _ 1035	VE	2012/11/02	66142				SUNSHINE	1	TRILLIUM		31		12	3	2		14		11	32		2				14	2	0	0	0	11:00:00-11:59:00	2012	0	Dommages matériels seulement	Montréal(06)	Montréal (66 )	1	0	0	1	0	0	0	0	0	0	0	0	0
SPVM _ 2012 _ 10350	ME	2012/12/19	66023				BD ILE DES SOEUR	1	RENE LEVESQUE		31		12	3	2		14		11	31		1				14	2	0	0	0	22:00:00-22:59:00	2012	0	Dommages matériels seulement	Montréal(06)	Montréal (66 )	2	0	0	0	0	0	0	0	0	0	0	0	0
SPVM _ 2012 _ 10351	VE	2012/12/21	66023				ROLLAND	1	MONTEITH		31		12	1	2		14	1	11	32	6	1			S	14	3	0	0	2	15:00:00-15:59:00	2012	2	Léger	Montréal(06)	Montréal (66 )	3	0	0	0	0	0	0	0	0	0	0	0	0
SPVM _ 2012 _ 10352	SA	2012/12/22	66023				5E AV	1	DE VERDUN		31		16	1	1		14		11	33		1			S	17	2	0	0	0	15:00:00-15:59:00	2012	0	Dommages matériels seulement	Montréal(06)	Montréal (66 )	2	0	0	0	0	0	0	0	0	0	0	0	0
SPVM _ 2012 _ 10353	DI	2012/12/23	66023	30			PL DU COMMERCE	2	STAT		31		16	2	3		21		11	99					E	12	2	0	0	0	16:00:00-16:59:00	2012	0	Dommages matériels inférieurs au seuil de rapportage	Montréal(06)	Montréal (66 )	1	0	0	0	0	0	0	0	0	0	0	0	1
SPVM _ 2012 _ 10354	LU	2012/12/24	66023				ARGYLE	1	WELLINGTON		31		12	3	2		14		11	32		2			O	11	2	0	0	0	18:00:00-18:59:00	2012	0	Dommages matériels inférieurs au seuil de rapportage	Montréal(06)	Montréal (66 )	2	0	0	0	0	0	0	0	0	0	0	0	0
SPVM _ 2012 _ 10355	MA	2012/12/25	66023	5302			BANNANTYNE	2	FACE A L ADRESSE	15	31		12	3	2		14		11	33		2			S	11	2	0	0	0	17:00:00-17:59:00	2012	0	Dommages matériels inférieurs au seuil de rapportage	Montréal(06)	Montréal (66 )	2	0	0	0	0	0	0	0	0	0	0	0	0
SPVM _ 2012 _ 10356	VE	2012/12/28	66023					1	GALT ET WELLINGTON	10	31		16	1	3		13		11	33		1			N	11	2	0	0	0	12:00:00-12:59:00	2012	0	Dommages matériels inférieurs au seuil de rapportage	Montréal(06)	Montréal (66 )	1	0	1	0	0	0	0	0	0	0	0	0	0
SPVM _ 2012 _ 10357	LU	2012/12/24	66023					1	40 PL DU COMMERCE			9	12	2	3		21		11	40		9				11	2	0	0	0	16:00:00-16:59:00	2012	0	Dommages matériels inférieurs au seuil de rapportage	Montréal(06)	Montréal (66 )	2	0	0	0	0	0	0	0	0	0	0	0	0
SPVM _ 2012 _ 10358	VE	2012/12/28	66023				GERTRUDE	1	STRATHMORE		31		16	1	2		14		11	32		1			N	11	2	0	0	0	17:00:00-17:59:00	2012	0	Dommages matériels inférieurs au seuil de rapportage	Montréal(06)	Montréal (66 )	1	0	0	0	0	0	0	0	0	0	0	0	1
SPVM _ 2012 _ 10359	JE	2012/12/27	66023	1291			MANNING				31		16	2	2		14		11	33		1				18	2	0	0	0	15:00:00-15:59:00	2012	0	Dommages matériels inférieurs au seuil de rapportage	Montréal(06)	Montréal (66 )	1	0	0	0	0	0	0	0	0	0	0	0	1
SPVM _ 2012 _ 1036	SA	2012/11/03	66142	225			ANDRAS	1	SPRING GARDEN	100	31		11		2		21		11	34		1			S	11	2	0	0	0	Non précisé	2012	0	Dommages matériels inférieurs au seuil de rapportage	Montréal(06)	Montréal (66 )	1	0	0	0	0	0	0	0	0	0	0	0	1
SPVM _ 2012 _ 10360	SA	2012/12/29	66023				JOSEPH	1	EGLISE	5	31		16	1	3		13		11	32		1			S	17	2	0	0	0	14:00:00-14:59:00	2012	0	Dommages matériels seulement	Montréal(06)	Montréal (66 )	2	0	0	0	0	0	0	0	0	0	0	0	0
SPVM _ 2012 _ 10361	JE	2012/12/27	66023	343			ARGYLE				31		16		2		14		11	34		1					2	0	0	0	14:00:00-14:59:00	2012	0	Dommages matériels inférieurs au seuil de rapportage	Montréal(06)	Montréal (66 )	1	0	0	0	0	0	0	0	0	0	0	0	1
SPVM _ 2012 _ 10362	DI	2012/12/30	66023	46			LAFLEUR	1	TROY	100	52		16	1	2		22								E	11	1	0	0	0	09:00:00-09:59:00	2012	0	Dommages matériels inférieurs au seuil de rapportage	Montréal(06)	Montréal (66 )	0	1	0	0	0	0	0	0	0	0	0	0	0
SPVM _ 2012 _ 10363	LU	2012/12/31	66023				BANNANTYNE		BEATTY		31		16	3	2		14		11	33		2			E	12	2	0	0	0	Non précisé	2012	0	Dommages matériels inférieurs au seuil de rapportage	Montréal(06)	Montréal (66 )	1	0	0	0	0	0	0	0	0	0	0	0	1
SPVM _ 2012 _ 10364	VE	2012/12/28	66023	30000			WELLINGTO(N STAT				31		16	3	3		21		11	99							2	0	0	0	17:00:00-17:59:00	2012	0	Dommages matériels inférieurs au seuil de rapportage	Montréal(06)	Montréal (66 )	1	0	0	0	0	0	0	0	0	0	0	0	1
SPVM _ 2012 _ 10365	JE	2012/12/27	66023	758			OSBORNE				31	3	16	1	2		15		11	34		1				17	2	0	0	0	16:00:00-16:59:00	2012	0	Dommages matériels seulement	Montréal(06)	Montréal (66 )	1	0	0	0	0	0	0	0	0	0	0	0	1
SPVM _ 2012 _ 10366	VE	2012/12/21	66023	6300			BEURLING OPP				31			3	2		14		11	34		2					2	0	0	0	Non précisé	2012	0	Dommages matériels inférieurs au seuil de rapportage	Montréal(06)	Montréal (66 )	2	0	0	0	0	0	0	0	0	0	0	0	0
SPVM _ 2012 _ 10367	SA	2012/12/01	66023						TERRITOIRE DE MONTREAL		31																2	0	0	0	12:00:00-12:59:00	2012	0	Dommages matériels inférieurs au seuil de rapportage	Montréal(06)	Montréal (66 )	0	0	0	0	0	0	0	0	0	0	0	0	2
SPVM _ 2012 _ 10368	SA	2012/12/29	66023	680			EGAN			10	31		16		2		14		11	34		1			E	12	2	0	0	0	20:00:00-20:59:00	2012	0	Dommages matériels inférieurs au seuil de rapportage	Montréal(06)	Montréal (66 )	1	0	0	0	0	0	0	0	0	0	0	0	1
SPVM _ 2012 _ 10369	SA	2012/12/22	66023	1267			GOUIN								2		14		11	34		2					2	0	0	0	Non précisé	2012	0	Dommages matériels inférieurs au seuil de rapportage	Montréal(06)	Montréal (66 )	1	0	0	0	0	0	0	0	0	0	0	0	1
SPVM _ 2012 _ 1037	SA	2012/11/03	66142				BRUNSWICK	1	SOURCES BD		31		12	3	3		13		11	32		3				14	2	0	0	0	18:00:00-18:59:00	2012	0	Dommages matériels seulement	Montréal(06)	Montréal (66 )	2	0	0	0	0	0	0	0	0	0	0	0	0
SPVM _ 2012 _ 10370	JE	2012/12/27	66023	6395			LASALLE				31		16		2		13		11	32		3				18	2	0	0	0	Non précisé	2012	0	Dommages matériels seulement	Montréal(06)	Montréal (66 )	1	0	0	0	0	0	0	0	0	0	0	0	1
SPVM _ 2012 _ 10371	MA	2012/12/18	66023	2000			BD RENE LEVESQUE ILE DES SOEURS				31		11	1	3		21		11	40		9				11	2	0	0	0	11:00:00-11:59:00	2012	0	Dommages matériels inférieurs au seuil de rapportage	Montréal(06)	Montréal (66 )	1	0	0	0	0	0	0	0	0	0	0	0	1
SPVM _ 2012 _ 10372	JE	2012/10/25	66023					2	DS RUELLE DERR LE 43 AU 53 WILLIBR						2		16		11						N		2	0	0	0	00:00:00-00:59:00	2012	0	Dommages matériels inférieurs au seuil de rapportage	Montréal(06)	Montréal (66 )	1	0	0	0	0	0	0	0	0	0	0	0	1
SPVM _ 2012 _ 10373	JE	2012/05/24	66023				GORDON	1	LASALLE				11	1	2		14		11	34		1				11	2	0	0	0	Non précisé	2012	0	Dommages matériels inférieurs au seuil de rapportage	Montréal(06)	Montréal (66 )	1	0	0	0	0	0	0	0	0	0	0	0	1
SPVM _ 2012 _ 10374	JE	2012/11/01	66023				EGLISE	1	GAETAN LABERGE	100	31		11	1	7		21		11	40		2			S	11	2	0	0	0	12:00:00-12:59:00	2012	0	Dommages matériels seulement	Montréal(06)	Montréal (66 )	2	0	0	0	0	0	0	0	0	0	0	0	0
SPVM _ 2012 _ 10375	VE	2012/02/24	67025					1	CH ST FRANCOIS XAVIER	50	40		16	3	3	132	12	1	14	34	6	1			O	17	1	0	0	1	22:00:00-22:59:00	2012	1	Léger	Montérégie(16)	Roussillon (67 )	1	0	0	0	0	0	0	0	0	0	0	0	0
SPVM _ 2012 _ 10376	LU	2012/01/02	66023	486			STE CATHERINE O				31		12	1	3		13		11	34		1				11	2	0	0	0	11:00:00-11:59:00	2012	0	Dommages matériels inférieurs au seuil de rapportage	Montréal(06)	Montréal (66 )	1	0	0	0	0	0	0	0	0	0	0	0	1
SPVM _ 2012 _ 10377	MA	2012/01/03	66023	2250			GUY				31		11	1	3		13		13	34		3				11	2	0	0	0	09:00:00-09:59:00	2012	0	Dommages matériels seulement	Montréal(06)	Montréal (66 )	2	0	0	0	0	0	0	0	0	0	0	0	0
SPVM _ 2012 _ 10378	LU	2012/01/02	66023				TERR DE MTL				31																2	0	0	0	14:00:00-14:59:00	2012	0	Dommages matériels seulement	Montréal(06)	Montréal (66 )	1	0	0	0	0	0	0	0	0	0	0	0	1
SPVM _ 2012 _ 10379	ME	2012/01/04	66023	3484			STANLEY	1	DR PENFIELD	100	31		15	1	2		14		12	34		1			S	11	2	0	0	0	15:00:00-15:59:00	2012	0	Dommages matériels seulement	Montréal(06)	Montréal (66 )	1	0	0	0	0	0	0	0	0	0	0	0	1
SPVM _ 2012 _ 1038	VE	2012/11/09	66142				LAKE	1	BD ST JEAN		31		11	1	3		13	1	11	32	6	3				11	4	0	0	1	08:00:00-08:59:00	2012	1	Léger	Montréal(06)	Montréal (66 )	4	0	0	0	0	0	0	0	0	0	0	0	0
SPVM _ 2012 _ 10380	JE	2012/01/05	66023				ST ANTOINE	1	DE LA MONTAGNE		31		11	3	3		13		11	32		1	2			17	2	0	0	0	01:00:00-01:59:00	2012	0	Dommages matériels seulement	Montréal(06)	Montréal (66 )	2	0	0	0	0	0	0	0	0	0	0	0	0
SPVM _ 2012 _ 10381	JE	2012/01/05	66023				MACKAY	1	ENTRE STE CATHERINE ET MAISONNEUVE	1000	31		12	1	3		14		11	34		1			S	11	2	0	0	0	09:00:00-09:59:00	2012	0	Dommages matériels inférieurs au seuil de rapportage	Montréal(06)	Montréal (66 )	2	0	0	0	0	0	0	0	0	0	0	0	0
SPVM _ 2012 _ 10382	JE	2012/01/05	66023				MONTAGNE	1	N-D																		2	0	0	0	16:00:00-16:59:00	2012	0	Dommages matériels seulement	Montréal(06)	Montréal (66 )	1	0	0	0	0	0	0	0	0	0	0	0	1
SPVM _ 2012 _ 10383	JE	2012/01/05	66023	1176			STE CATHERINE O	1	STANLEY		31		15	2	3		13		11	33		1				11	2	0	0	0	19:00:00-19:59:00	2012	0	Dommages matériels seulement	Montréal(06)	Montréal (66 )	2	0	0	0	0	0	0	0	0	0	0	0	0
SPVM _ 2012 _ 10384	VE	2012/01/06	66023				PEEL	1	SHERBROOKE	3	31		12	1	3		13		11	32		2			N	12	2	0	0	0	06:00:00-06:59:00	2012	0	Dommages matériels inférieurs au seuil de rapportage	Montréal(06)	Montréal (66 )	1	1	0	0	0	0	0	0	0	0	0	0	0
SPVM _ 2012 _ 10385	VE	2012/01/06	66023					1	AYLMER ET STE CATHERINE		31		12	1	3		13		11	32		1				11	2	0	0	0	13:00:00-13:59:00	2012	0	Dommages matériels inférieurs au seuil de rapportage	Montréal(06)	Montréal (66 )	1	0	0	0	0	0	0	0	0	0	0	0	1
SPVM _ 2012 _ 10386	SA	2012/01/07	66023	1436			MACKAY			10	31		12	3	3		12		11	32		1			N	12	3	0	0	0	Non précisé	2012	0	Dommages matériels seulement	Montréal(06)	Montréal (66 )	3	0	0	0	0	0	0	0	0	0	0	0	0
SPVM _ 2012 _ 10387	SA	2012/01/07	66023	1285			DE MAISONNEUVE O	1	CRESCENT	50	49		18	1	3		16		11	99		9			E	11	1	0	0	0	11:00:00-11:59:00	2012	0	Dommages matériels seulement	Montréal(06)	Montréal (66 )	1	0	0	0	0	0	0	0	0	0	0	0	0
SPVM _ 2012 _ 10388	SA	2012/01/07	66023				UNIVERSITY	1	MAISONNEUVE	50	31		12	1	3		19		11	34		1			O	17	2	0	0	0	15:00:00-15:59:00	2012	0	Dommages matériels inférieurs au seuil de rapportage	Montréal(06)	Montréal (66 )	1	1	0	0	0	0	0	0	0	0	0	0	0
SPVM _ 2012 _ 10389	DI	2012/01/08	66023				PEEL	1	RENE LEVESQUE		31		12	3	3		19		11	32		3				11	2	0	0	0	18:00:00-18:59:00	2012	0	Dommages matériels seulement	Montréal(06)	Montréal (66 )	2	0	0	0	0	0	0	0	0	0	0	0	0
SPVM _ 2012 _ 1039	JE	2012/11/08	66142	3237			DES SOURCES	2	STAT C A GAL DES SOURCES		31		11	1	3		21									11	2	0	0	0	Non précisé	2012	0	Dommages matériels inférieurs au seuil de rapportage	Montréal(06)	Montréal (66 )	1	0	0	0	0	0	0	0	0	0	0	0	1
SPVM _ 2012 _ 10390	LU	2012/01/09	66023	1444			METCALFE		A L OPP		31	9	11	3	3		13		13	99		1				11	2	0	0	0	19:00:00-19:59:00	2012	0	Dommages matériels seulement	Montréal(06)	Montréal (66 )	2	0	0	0	0	0	0	0	0	0	0	0	0
SPVM _ 2012 _ 10391	LU	2012/01/09	66023				UNIVERSITY ET PRES KENNEDY			30			12						11	33		1			S	11	2	0	0	0	14:00:00-14:59:00	2012	0	Dommages matériels inférieurs au seuil de rapportage	Montréal(06)	Montréal (66 )	1	0	0	0	0	0	0	0	0	0	0	0	1
SPVM _ 2012 _ 10392	LU	2012/01/09	66023				VICTOR HUGO(	1	VERSAILLE	5	31		99	1	2		15		11	32		2			E	99	2	0	0	0	07:00:00-07:59:00	2012	0	Dommages matériels seulement	Montréal(06)	Montréal (66 )	1	0	0	0	0	0	0	0	0	0	0	0	1
SPVM _ 2012 _ 10393	MA	2012/01/10	66023				ST ANTOINE	1	MANSFIELD		33		11	1	3		13	1	12	32	6	3				11	2	0	0	1	15:00:00-15:59:00	2012	1	Léger	Montréal(06)	Montréal (66 )	1	0	0	0	1	0	0	0	0	0	0	0	0
SPVM _ 2012 _ 10394	MA	2012/01/10	66023					1	LUCIEN L ALLIER ET ST ANTOINE		31		11	3	5		13		14	32		1			N	11	2	0	0	0	20:00:00-20:59:00	2012	0	Dommages matériels seulement	Montréal(06)	Montréal (66 )	2	0	0	0	0	0	0	0	0	0	0	0	0
SPVM _ 2012 _ 10395	ME	2012/01/11	66023				SHERBROOKE O	1	MC GILL COLLEGE		31		11	3	3		12		11	33		3				11	2	0	0	0	00:00:00-00:59:00	2012	0	Dommages matériels inférieurs au seuil de rapportage	Montréal(06)	Montréal (66 )	1	0	0	0	0	0	0	1	0	0	0	0	0
SPVM _ 2012 _ 10396	LU	2012/01/09	66023	600			LA GAUCHETIERE O				31		11	1	3		21		11			1				11	2	0	0	0	09:00:00-09:59:00	2012	0	Dommages matériels inférieurs au seuil de rapportage	Montréal(06)	Montréal (66 )	1	0	0	0	0	0	0	0	0	0	0	0	1
SPVM _ 2012 _ 10397	ME	2012/01/11	66023				CONCORDE	1	PRESIDENT KENNEDY		31		11	1	3		19		11	34		2			S	11	2	0	0	0	11:00:00-11:59:00	2012	0	Dommages matériels seulement	Montréal(06)	Montréal (66 )	1	0	0	0	0	0	0	0	0	0	0	0	1
SPVM _ 2012 _ 10398	ME	2012/01/11	66023	1650			AV CEDAR				31		12	1	9		21		14	99		2				11	2	0	0	0	13:00:00-13:59:00	2012	0	Dommages matériels inférieurs au seuil de rapportage	Montréal(06)	Montréal (66 )	2	0	0	0	0	0	0	0	0	0	0	0	0
SPVM _ 2012 _ 10399	ME	2012/01/11	66023					1	STANLEY ET STE CATHERINE	20	31		12	3	3		14		11	34		1			S	11	2	0	0	0	16:00:00-16:59:00	2012	0	Dommages matériels inférieurs au seuil de rapportage	Montréal(06)	Montréal (66 )	1	0	0	0	0	0	0	0	0	0	0	0	1
SPVM _ 2012 _ 104	VE	2012/02/24	66023				BD DE PIERREFONDS	1	RICHMOND				16	3	2		13		11	32		3				12	2	0	0	0	18:00:00-18:59:00	2012	0	Dommages matériels inférieurs au seuil de rapportage	Montréal(06)	Montréal (66 )	2	0	0	0	0	0	0	0	0	0	0	0	0
SPVM _ 2012 _ 1040	DI	2012/11/04	66142	3544			DES SOURCES BD	2	STAT		31		11	3	3		21		11	40						11	2	0	0	0	20:00:00-20:59:00	2012	0	Dommages matériels seulement	Montréal(06)	Montréal (66 )	1	0	0	0	0	0	0	0	0	0	0	0	1
SPVM _ 2012 _ 10400	JE	2012/01/12	66023	687			AV DES PINS O				31		16	1	3		21		11	99						17	2	0	0	0	Non précisé	2012	0	Dommages matériels inférieurs au seuil de rapportage	Montréal(06)	Montréal (66 )	1	0	0	0	0	0	0	0	0	0	0	0	1
SPVM _ 2012 _ 10401	JE	2012/01/12	66023				STE CATHERINE O	1	GUY	10	32		16	1	3		13	1	11	33	7	1			O	18	1	0	0	1	13:00:00-13:59:00	2012	1	Léger	Montréal(06)	Montréal (66 )	1	0	0	0	0	0	0	0	0	0	0	0	0
SPVM _ 2012 _ 10402	JE	2012/01/12	66023	687			AV DES PINS O	2	STAT P3 CH ROYAL VIC	250	50		16	2	3		22		23	99		2			O	18	1	0	0	0	15:00:00-15:59:00	2012	0	Dommages matériels inférieurs au seuil de rapportage	Montréal(06)	Montréal (66 )	0	0	1	0	0	0	0	0	0	0	0	0	0
SPVM _ 2012 _ 10403	JE	2012/01/12	66023				CATHCART	1	UNIVERSITY		31		16	2	3		14								S	17	2	0	0	0	16:00:00-16:59:00	2012	0	Dommages matériels inférieurs au seuil de rapportage	Montréal(06)	Montréal (66 )	2	0	0	0	0	0	0	0	0	0	0	0	0
SPVM _ 2012 _ 10404	DI	2012/01/08	66023				VERSAILLES	1	VICTOR HUGO		31			2	2		14			34		1					2	0	0	0	17:00:00-17:59:00	2012	0	Dommages matériels seulement	Montréal(06)	Montréal (66 )	1	0	0	0	0	0	0	0	0	0	0	0	1
SPVM _ 2012 _ 10405	VE	2012/01/13	66023					1	CATHEDRALE ET GAUCHETIERE	20	42		16	1	3		13		14	33		1			N	17	1	0	0	0	12:00:00-12:59:00	2012	0	Dommages matériels seulement	Montréal(06)	Montréal (66 )	1	0	0	0	0	0	0	0	0	0	0	0	0
SPVM _ 2012 _ 10406	VE	2012/01/13	66023					1	SHERBROOKE O ET UNION	5	31		15	1	3		13		11	32		3			O	17	2	0	0	0	10:00:00-10:59:00	2012	0	Dommages matériels inférieurs au seuil de rapportage	Montréal(06)	Montréal (66 )	1	0	0	0	0	0	0	0	1	0	0	0	0
SPVM _ 2012 _ 10407	VE	2012/01/13	66023				WILLIAMS	1	DE LA MONTAGNE		31		16	1	4		19		11	32		1				17	2	0	0	0	14:00:00-14:59:00	2012	0	Dommages matériels inférieurs au seuil de rapportage	Montréal(06)	Montréal (66 )	2	0	0	0	0	0	0	0	0	0	0	0	0
SPVM _ 2012 _ 10408	VE	2012/01/13	66023				N-D O	1	GUY	2	31		16	1	3		13		11	32		2			E	17	2	0	0	0	14:00:00-14:59:00	2012	0	Dommages matériels seulement	Montréal(06)	Montréal (66 )	0	1	0	0	0	0	0	1	0	0	0	0	0
SPVM _ 2012 _ 10409	VE	2012/01/13	66023	1015			ST ALEXANDRE	1	DE LA GAUCHETIERE	15	31		16		3		13		13	33		1			S	17	2	0	0	0	Non précisé	2012	0	Dommages matériels seulement	Montréal(06)	Montréal (66 )	1	1	0	0	0	0	0	0	0	0	0	0	0
SPVM _ 2012 _ 1041	SA	2012/11/10	66142	3616			ST JEAN	1	SALLABERRY	100	31		11	3	3		13		11	33		5			S	11	2	0	0	0	04:00:00-04:59:00	2012	0	Dommages matériels seulement	Montréal(06)	Montréal (66 )	2	0	0	0	0	0	0	0	0	0	0	0	0
SPVM _ 2012 _ 10410	VE	2012/01/13	66023	1582			DES PINS	1	COTE DES NEIGES	40	31		16	3	1		13		11	33		1			O	17	2	0	0	0	Non précisé	2012	0	Dommages matériels inférieurs au seuil de rapportage	Montréal(06)	Montréal (66 )	1	0	0	0	0	0	0	0	0	0	0	0	1
SPVM _ 2012 _ 10411	DI	2012/01/08	66023					1	WILLIAM ET NAZARETH	25	31	9	99		3		14		11	33		1			O	99	2	0	0	0	21:00:00-21:59:00	2012	0	Dommages matériels inférieurs au seuil de rapportage	Montréal(06)	Montréal (66 )	1	0	0	0	0	0	0	0	0	0	0	1	0
SPVM _ 2012 _ 10412	SA	2012/01/14	66023	2144			GUY				48		16	1	3		13		11	33		2				11	1	0	0	0	12:00:00-12:59:00	2012	0	Dommages matériels inférieurs au seuil de rapportage	Montréal(06)	Montréal (66 )	0	0	0	0	0	0	0	0	1	0	0	0	0
SPVM _ 2012 _ 10413	SA	2012/01/14	66023	2150			CRESCENT	2	SHERBROOKE O	50	31		16	1	3		13		13	34		1			S	11	2	0	0	0	13:00:00-13:59:00	2012	0	Dommages matériels inférieurs au seuil de rapportage	Montréal(06)	Montréal (66 )	2	0	0	0	0	0	0	0	0	0	0	0	0
SPVM _ 2012 _ 10414	VE	2012/01/13	66023				WELLINGTON	1	PEEL		31		16	3	3		15		11	33		3				18	2	0	0	0	Non précisé	2012	0	Dommages matériels inférieurs au seuil de rapportage	Montréal(06)	Montréal (66 )	1	0	0	0	0	0	0	0	0	0	0	0	1
SPVM _ 2012 _ 10415	MA	2012/01/10	66023	600			DE LA GAUCHETIERE O				31		11	1	3		21		11	99		9				12	2	0	0	0	08:00:00-08:59:00	2012	0	Dommages matériels inférieurs au seuil de rapportage	Montréal(06)	Montréal (66 )	1	0	0	0	0	0	0	0	0	0	0	0	1
SPVM _ 2012 _ 10416	SA	2012/01/14	66023	900			RENE LEVESQUE O				31		16	3	3		13		11	99		3				11	2	0	0	0	22:00:00-22:59:00	2012	0	Dommages matériels inférieurs au seuil de rapportage	Montréal(06)	Montréal (66 )	2	0	0	0	0	0	0	0	0	0	0	0	0
SPVM _ 2012 _ 10417	SA	2012/01/14	66023					1	SHERBROOKE ET MC GILL COLLEGE		31	3	16	3	3		12		11	32		3				11	2	0	0	0	23:00:00-23:59:00	2012	0	Dommages matériels seulement	Montréal(06)	Montréal (66 )	1	1	0	0	0	0	0	0	0	0	0	0	0
SPVM _ 2012 _ 10418	DI	2012/01/15	66023					1	DE LA MONTAGNE ET ST JACQUES	20	40		16	3	3		11	1	12	33	6	2			N	11	1	0	0	0	02:00:00-02:59:00	2012	0	Dommages matériels seulement	Montréal(06)	Montréal (66 )	1	0	0	0	0	0	0	0	0	0	0	0	0
SPVM _ 2012 _ 10419	DI	2012/01/15	66023				SHERBROOKE	1	HUTCHISON	5	31		17	3	3		13		11	32		3				11	2	0	0	0	03:00:00-03:59:00	2012	0	Dommages matériels inférieurs au seuil de rapportage	Montréal(06)	Montréal (66 )	2	0	0	0	0	0	0	0	0	0	0	0	0
SPVM _ 2012 _ 1042	SA	2012/11/10	66142				ST JEAN	1	BLUE HAVEN		31		11	1	3		13	1	11	32	6	3				11	2	0	0	1	13:00:00-13:59:00	2012	1	Léger	Montréal(06)	Montréal (66 )	2	0	0	0	0	0	0	0	0	0	0	0	0
SPVM _ 2012 _ 10420	DI	2012/01/15	66023				GAUCHETIERE		MONTAGNE					3			21										2	0	0	0	19:00:00-19:59:00	2012	0	Dommages matériels inférieurs au seuil de rapportage	Montréal(06)	Montréal (66 )	1	0	0	0	0	0	0	0	0	0	0	0	1
SPVM _ 2012 _ 10421	DI	2012/01/15	66023	1240			DRUMMOND	1	STE CATHERINE O	50	31		18		3		13		11	33		1			S	11	2	0	0	0	17:00:00-17:59:00	2012	0	Dommages matériels seulement	Montréal(06)	Montréal (66 )	2	0	0	0	0	0	0	0	0	0	0	0	0
SPVM _ 2012 _ 10422	LU	2012/01/16	66023				WELLINGTON	1	DUKE		41		17	3	3		14		11	32		1				11	2	0	0	0	03:00:00-03:59:00	2012	0	Dommages matériels seulement	Montréal(06)	Montréal (66 )	0	2	0	0	0	0	0	0	0	0	0	0	0
SPVM _ 2012 _ 10423	SA	2012/01/14	66023	1414			STANLEY				31																2	0	0	0	Non précisé	2012	0	Dommages matériels seulement	Montréal(06)	Montréal (66 )	1	0	0	0	0	0	0	0	0	0	0	0	1
SPVM _ 2012 _ 10424	VE	2012/01/13	66023	1307			STE CATHERINE O				31		16	1	3		13		11	34		1				17	2	0	0	0	12:00:00-12:59:00	2012	0	Dommages matériels seulement	Montréal(06)	Montréal (66 )	1	0	0	0	0	0	0	0	0	0	0	0	1
SPVM _ 2012 _ 10425	LU	2012/01/16	66023	1517			AV DES PINS O				31			1	1		13		13	34		1				11	2	0	0	0	09:00:00-09:59:00	2012	0	Dommages matériels inférieurs au seuil de rapportage	Montréal(06)	Montréal (66 )	2	0	0	0	0	0	0	0	0	0	0	0	0
SPVM _ 2012 _ 10426	MA	2012/01/17	66023				SHERBROOKE	1	AYLMER		32		16	1	3		13	1	11	32	6	3			E	17	1	0	0	1	07:00:00-07:59:00	2012	1	Léger	Montréal(06)	Montréal (66 )	1	0	0	0	0	0	0	0	0	0	0	0	0
SPVM _ 2012 _ 10427	SA	2012/01/14	66023				DE MAISONNEUVE (PRES)		STANLEY	5	31		16	1	3		13		11	32						17	2	0	0	0	Non précisé	2012	0	Dommages matériels inférieurs au seuil de rapportage	Montréal(06)	Montréal (66 )	1	0	0	0	0	0	0	0	0	0	0	0	1
SPVM _ 2012 _ 10428	LU	2012/01/16	66023	1650			CEDAR	2	COTE DES NEIGES	30	31		12	1	9		21		11	99		9				12	1	0	0	0	16:00:00-16:59:00	2012	0	Dommages matériels inférieurs au seuil de rapportage	Montréal(06)	Montréal (66 )	0	0	0	0	0	0	0	0	1	0	0	0	0
SPVM _ 2012 _ 10429	MA	2012/01/17	66023				ST JACQUES	1	PEEL		32		16	1	3		13	1	11	32	6	3				12	1	0	0	1	14:00:00-14:59:00	2012	1	Léger	Montréal(06)	Montréal (66 )	1	0	0	0	0	0	0	0	0	0	0	0	0
SPVM _ 2012 _ 1043	SA	2012/11/10	66142	4443			RENE EMARD	2	FACE A L ADRESSE		31		11	1	2		14		11	34		2				11	2	0	0	0	13:00:00-13:59:00	2012	0	Dommages matériels seulement	Montréal(06)	Montréal (66 )	1	0	0	0	0	0	0	0	0	0	0	0	1
SPVM _ 2012 _ 10430	JE	2012/01/12	66023				WELLIGNTON		PEEL		31																2	0	0	0	17:00:00-17:59:00	2012	0	Dommages matériels seulement	Montréal(06)	Montréal (66 )	1	0	0	0	0	0	0	0	0	0	0	0	1
SPVM _ 2012 _ 10431	MA	2012/01/17	66023				STE CATHERINE	1	BISHOP	5	31		16	3	3		13		11	34		1			O	17	2	0	0	0	17:00:00-17:59:00	2012	0	Dommages matériels inférieurs au seuil de rapportage	Montréal(06)	Montréal (66 )	2	0	0	0	0	0	0	0	0	0	0	0	0
SPVM _ 2012 _ 10432	JE	2012/01/12	66023				STANLEY	1	RENE LEVESQUE		31		16	3	3		13		11	32		1				18	2	0	0	0	17:00:00-17:59:00	2012	0	Dommages matériels inférieurs au seuil de rapportage	Montréal(06)	Montréal (66 )	2	0	0	0	0	0	0	0	0	0	0	0	0
SPVM _ 2012 _ 10433	MA	2012/01/17	66023					1	PRES ST JACQAUES	10	39	3	15	3	3		13		11	33		3			S	12	2	0	0	0	19:00:00-19:59:00	2012	0	Dommages matériels inférieurs au seuil de rapportage	Montréal(06)	Montréal (66 )	0	1	0	0	0	0	0	1	0	0	0	0	0
SPVM _ 2012 _ 10434	MA	2012/01/17	66023				SQUARE PHILLIPS ET STE CATHERINE O	1		5	31		18	3	3		13		11	32		1			S	14	2	0	0	0	23:00:00-23:59:00	2012	0	Dommages matériels seulement	Montréal(06)	Montréal (66 )	2	0	0	0	0	0	0	0	0	0	0	0	0
SPVM _ 2012 _ 10435	ME	2012/01/18	66023	3740			PEEL				31		16	1	1		13		13	34		2				11	2	0	0	0	11:00:00-11:59:00	2012	0	Dommages matériels seulement	Montréal(06)	Montréal (66 )	2	0	0	0	0	0	0	0	0	0	0	0	0
SPVM _ 2012 _ 10436	ME	2012/01/18	66023				GUY	1	N-D O	20	31		16	1	3		19		11	34		2			E	11	2	0	0	0	Non précisé	2012	0	Dommages matériels seulement	Montréal(06)	Montréal (66 )	1	1	0	0	0	0	0	0	0	0	0	0	0
SPVM _ 2012 _ 10437	ME	2012/01/18	66023				ST PAUL O	1	ST HENRI	20	31		18	1	3		13		11	33		2			O	11	2	0	0	0	13:00:00-13:59:00	2012	0	Dommages matériels inférieurs au seuil de rapportage	Montréal(06)	Montréal (66 )	2	0	0	0	0	0	0	0	0	0	0	0	0
SPVM _ 2012 _ 10438	ME	2012/01/18	66023				DOCTEUR PENFIELD	1	DU MUSEE		31		16	1	2		14			33		1				11	2	0	0	0	Non précisé	2012	0	Dommages matériels inférieurs au seuil de rapportage	Montréal(06)	Montréal (66 )	2	0	0	0	0	0	0	0	0	0	0	0	0
SPVM _ 2012 _ 10439	JE	2012/01/19	66023	1230			N-D O	1	MONTAGNE	10	31		16	3	3		13		11	33		3			O	11	2	0	0	0	06:00:00-06:59:00	2012	0	Dommages matériels inférieurs au seuil de rapportage	Montréal(06)	Montréal (66 )	1	1	0	0	0	0	0	0	0	0	0	0	0
SPVM _ 2012 _ 1044	LU	2012/11/12	66142					1	ST JEAN		31	1	11	1	3		13		11	33		5				11	3	0	0	0	08:00:00-08:59:00	2012	0	Dommages matériels seulement	Montréal(06)	Montréal (66 )	3	0	0	0	0	0	0	0	0	0	0	0	0
SPVM _ 2012 _ 10440	JE	2012/01/19	66023				REMEMBRANCE	1	COTE DES NEIGES	20	31	1	15	1	7		13		24	33		1			E	11	3	0	0	0	08:00:00-08:59:00	2012	0	Dommages matériels seulement	Montréal(06)	Montréal (66 )	3	0	0	0	0	0	0	0	0	0	0	0	0
SPVM _ 2012 _ 10441	ME	2012/01/18	66023	1650			CEDAR				31		11	1	3		21									11	2	0	0	0	Non précisé	2012	0	Dommages matériels inférieurs au seuil de rapportage	Montréal(06)	Montréal (66 )	1	0	0	0	0	0	0	0	0	0	0	0	1
SPVM _ 2012 _ 10442	VE	2012/01/20	66023	1221			GUY						16	3	3		12		11	34		2				17	2	0	0	0	01:00:00-01:59:00	2012	0	Dommages matériels inférieurs au seuil de rapportage	Montréal(06)	Montréal (66 )	1	0	0	0	0	0	0	0	1	0	0	0	0
SPVM _ 2012 _ 10443	VE	2012/01/20	66023				PEEL	1	MAISONNEUVE		32		18	1	3		19	1	11	32	6	2				11	1	0	0	1	11:00:00-11:59:00	2012	1	Léger	Montréal(06)	Montréal (66 )	0	0	0	0	0	0	0	1	0	0	0	0	0
SPVM _ 2012 _ 10444	VE	2012/01/20	66023				MAISONNEUVE ET DE LA MONTAGNE	1	MAISONNEUVE ET DE LA MONTAGNE	50			11	1	3		13		11	34		2			N	11	2	0	0	0	08:00:00-08:59:00	2012	0	Dommages matériels inférieurs au seuil de rapportage	Montréal(06)	Montréal (66 )	2	0	0	0	0	0	0	0	0	0	0	0	0
SPVM _ 2012 _ 10445	VE	2012/01/20	66023					1	RENE LEVESQUE ET UNION	10	31		15	3	3		13	1	11	32	6	3			E	12	2	0	0	1	22:00:00-22:59:00	2012	1	Léger	Montréal(06)	Montréal (66 )	1	0	0	0	0	0	0	1	0	0	0	0	0
SPVM _ 2012 _ 10446	SA	2012/01/21	66023				UNIVERSITE	1	GAUCHETIER		31		12	3	3		13		13	32		2			S	12	2	0	0	0	04:00:00-04:59:00	2012	0	Dommages matériels inférieurs au seuil de rapportage	Montréal(06)	Montréal (66 )	1	1	0	0	0	0	0	0	0	0	0	0	0
SPVM _ 2012 _ 10447	SA	2012/01/21	66023	1240			DRUMMOND				31		18	3	3		14		11	33		1				12	4	0	0	0	21:00:00-21:59:00	2012	0	Dommages matériels seulement	Montréal(06)	Montréal (66 )	3	0	0	0	0	0	0	0	0	0	0	0	1
SPVM _ 2012 _ 10448	DI	2012/01/22	66023	3744			COTE DES NEIGES				31	9	18	3	2		15		23	34		1				12	2	0	0	0	20:00:00-20:59:00	2012	0	Dommages matériels seulement	Montréal(06)	Montréal (66 )	2	0	0	0	0	0	0	0	0	0	0	0	0
SPVM _ 2012 _ 10449	VE	2012/01/20	66023				MACKAY	1	OVERDALE	25	31				2		14		11	34		1			S		2	0	0	0	21:00:00-21:59:00	2012	0	Dommages matériels seulement	Montréal(06)	Montréal (66 )	1	0	0	0	0	0	0	0	0	0	0	0	1
SPVM _ 2012 _ 1045	LU	2012/11/12	66142	246			BAFFIN				31	9	11	1	2		14		11	99		2				11	2	0	0	0	11:00:00-11:59:00	2012	0	Dommages matériels seulement	Montréal(06)	Montréal (66 )	1	1	0	0	0	0	0	0	0	0	0	0	0
SPVM _ 2012 _ 10450	LU	2012/01/23	66023					1	PEEL ET ST ANTOINE		32		12	3	3		13			32						15	1	0	0	1	18:00:00-18:59:00	2012	1	Léger	Montréal(06)	Montréal (66 )	1	0	0	0	0	0	0	0	0	0	0	0	0
SPVM _ 2012 _ 10451	MA	2012/01/24	66023	2170			DE LA MONTAGNE	1	SHERBROOKE	30	31		12	1	3		13		12	34		2			N	12	2	0	0	0	11:00:00-11:59:00	2012	0	Dommages matériels seulement	Montréal(06)	Montréal (66 )	2	0	0	0	0	0	0	0	0	0	0	0	0
SPVM _ 2012 _ 10452	MA	2012/01/24	66023	3455			COTE DES NEIGES				31		11	1	3		12		11	34		3				11	2	0	0	0	13:00:00-13:59:00	2012	0	Dommages matériels inférieurs au seuil de rapportage	Montréal(06)	Montréal (66 )	1	0	0	0	0	0	0	0	1	0	0	0	0
SPVM _ 2012 _ 10453	MA	2012/01/24	66023	1650			CEDAR				31		12	1	3		21		13	99		2				12	2	0	0	0	16:00:00-16:59:00	2012	0	Dommages matériels inférieurs au seuil de rapportage	Montréal(06)	Montréal (66 )	1	0	0	0	0	0	0	0	0	0	0	0	1
SPVM _ 2012 _ 10454	LU	2012/01/23	66023				DE LA CONCORDE	1	BURKE	25	31		18	1	3		21		11	99					O	11	2	0	0	0	05:00:00-05:59:00	2012	0	Dommages matériels inférieurs au seuil de rapportage	Montréal(06)	Montréal (66 )	1	0	0	0	0	0	0	0	0	0	0	0	1
SPVM _ 2012 _ 10455	MA	2012/01/24	66023				DUKE	1	WILLIAMS		31		11	1	3		21		11	99		9				11	2	0	0	0	Non précisé	2012	0	Dommages matériels inférieurs au seuil de rapportage	Montréal(06)	Montréal (66 )	2	0	0	0	0	0	0	0	0	0	0	0	0
SPVM _ 2012 _ 10456	ME	2012/01/25	66023				DES PINS	1	CEDAR		59		12	3	2		14	1	11	32	6	1				11	1	0	0	2	01:00:00-01:59:00	2012	2	Léger	Montréal(06)	Montréal (66 )	1	0	0	0	0	0	0	0	0	0	0	0	0
SPVM _ 2012 _ 10457	ME	2012/01/25	66023	1370			OVERDALE	1	LUCIEN L ALLIER	2			18	1	2		14		11	32		1			O	11	2	0	0	0	Non précisé	2012	0	Dommages matériels seulement	Montréal(06)	Montréal (66 )	1	0	0	0	0	0	0	0	0	0	0	0	1
SPVM _ 2012 _ 10458	ME	2012/01/25	66023				GUY	2	ARGYLE	20	47		12	1	3		13		13	39		2			S	11	1	0	0	0	13:00:00-13:59:00	2012	0	Dommages matériels seulement	Montréal(06)	Montréal (66 )	0	1	0	0	0	0	0	0	0	0	0	0	0
SPVM _ 2012 _ 10459	MA	2012/01/24	66023	1204			CRESCENT	1	RENE LEVESQUE O	100	31				3		21		11	99		9			N		2	0	0	0	16:00:00-16:59:00	2012	0	Dommages matériels inférieurs au seuil de rapportage	Montréal(06)	Montréal (66 )	1	0	0	0	0	0	0	0	0	0	0	0	1
SPVM _ 2012 _ 1046	MA	2012/11/13	66142	4280			BD ST JEAN					9	11	1	3		13		11	33		3				11	1	0	0	0	08:00:00-08:59:00	2012	0	Dommages matériels seulement	Montréal(06)	Montréal (66 )	1	0	0	0	0	0	0	0	0	0	0	0	0
SPVM _ 2012 _ 10460	ME	2012/01/25	66023				DR PENFIELD	1	DRUMMOND	1	31		12	1	2		14		11	32		1				11	2	0	0	0	11:00:00-11:59:00	2012	0	Dommages matériels seulement	Montréal(06)	Montréal (66 )	2	0	0	0	0	0	0	0	0	0	0	0	0
SPVM _ 2012 _ 10461	ME	2012/01/25	66023				ST ANTOINE O	1	UNIVERSITY	10	31		11	1	3		13		11	33		2			E	11	2	0	0	0	16:00:00-16:59:00	2012	0	Dommages matériels seulement	Montréal(06)	Montréal (66 )	1	0	0	1	0	0	0	0	0	0	0	0	0
SPVM _ 2012 _ 10462	MA	2012/01/24	66023	3654			SIR WILLIAM OSLER				31				1		22										2	0	0	0	06:00:00-06:59:00	2012	0	Dommages matériels inférieurs au seuil de rapportage	Montréal(06)	Montréal (66 )	1	0	0	0	0	0	0	0	0	0	0	0	1
SPVM _ 2012 _ 10463	JE	2012/01/26	66023				UNION		STE CATHERINE		31		11	3	3												2	0	0	0	Non précisé	2012	0	Dommages matériels inférieurs au seuil de rapportage	Montréal(06)	Montréal (66 )	1	0	0	0	0	0	0	0	0	0	0	0	1
SPVM _ 2012 _ 10464	JE	2012/01/26	66023	1650			CEDAR	1	DES PINS	100	31		11	1	3		12	1	11	33		2			O	11	3	0	0	1	13:00:00-13:59:00	2012	1	Léger	Montréal(06)	Montréal (66 )	2	0	0	0	0	0	0	1	0	0	0	0	0
SPVM _ 2012 _ 10465	JE	2012/01/26	66023				STE CATHERINE O	1	BISHOP	20	31		11	1	3		13		11	34		1			O	11	2	0	0	0	14:00:00-14:59:00	2012	0	Dommages matériels inférieurs au seuil de rapportage	Montréal(06)	Montréal (66 )	2	0	0	0	0	0	0	0	0	0	0	0	0
SPVM _ 2012 _ 10466	JE	2012/01/12	66023	280			HOUNG	1	OTTAWA		31		99	1	3		15		11	33		9				99	2	0	0	0	08:00:00-08:59:00	2012	0	Dommages matériels seulement	Montréal(06)	Montréal (66 )	1	0	0	0	0	0	0	0	0	0	0	0	1
SPVM _ 2012 _ 10467	JE	2012/01/26	66023				KING		WELLINGTON		31		11		3		19		11	34		1				11	2	0	0	0	Non précisé	2012	0	Dommages matériels seulement	Montréal(06)	Montréal (66 )	1	0	0	0	0	0	0	0	0	0	0	0	1
SPVM _ 2012 _ 10468	JE	2012/01/26	66023	895			GAUCHETIERE O				31			3	3		13		11	33		1					2	0	0	0	19:00:00-19:59:00	2012	0	Dommages matériels inférieurs au seuil de rapportage	Montréal(06)	Montréal (66 )	1	0	0	0	0	0	0	1	0	0	0	0	0
SPVM _ 2012 _ 10469	LU	2012/01/23	66023				ST ALEXANDRE	1	MAYOR	30	31				3		13		11	34		1			S		2	0	0	0	Non précisé	2012	0	Dommages matériels inférieurs au seuil de rapportage	Montréal(06)	Montréal (66 )	1	0	0	0	0	0	0	0	0	0	0	0	1
SPVM _ 2012 _ 1047	MA	2012/11/13	66142	3352			DES SOURCES	1	BRUNSWICK	100			12	1	3		13		11	34		3			N	12	2	0	0	0	08:00:00-08:59:00	2012	0	Dommages matériels seulement	Montréal(06)	Montréal (66 )	0	1	0	0	0	0	0	0	1	0	0	0	0
SPVM _ 2012 _ 10470	VE	2012/01/27	66023	1228			CRESCENT				31		18	3	3		14		11	34		1				14	2	0	0	0	19:00:00-19:59:00	2012	0	Dommages matériels inférieurs au seuil de rapportage	Montréal(06)	Montréal (66 )	2	0	0	0	0	0	0	0	0	0	0	0	0
SPVM _ 2012 _ 10471	VE	2012/01/27	66023				STANLEY	1	MAISONNEUVE		31		12	2			13		13	33		1				14	2	0	0	0	Non précisé	2012	0	Dommages matériels seulement	Montréal(06)	Montréal (66 )	1	0	0	0	0	0	0	0	0	0	0	0	1
SPVM _ 2012 _ 10472	VE	2012/01/27	66023				LUCIEN L ALLIER	1	ST JACQUES		31		16	1	3		13		13	32		1				17	2	0	0	0	08:00:00-08:59:00	2012	0	Dommages matériels inférieurs au seuil de rapportage	Montréal(06)	Montréal (66 )	1	0	0	0	0	0	0	0	0	0	0	0	1
SPVM _ 2012 _ 10473	SA	2012/01/28	66023	1420			CRESCENT				31		12	3	3		14		11	33		1				11	2	0	0	0	03:00:00-03:59:00	2012	0	Dommages matériels seulement	Montréal(06)	Montréal (66 )	2	0	0	0	0	0	0	0	0	0	0	0	0
SPVM _ 2012 _ 10474	JE	2012/01/26	66023				SHERBROOKE		STANLEY					1	3		13		11	34		3					2	0	0	0	13:00:00-13:59:00	2012	0	Dommages matériels inférieurs au seuil de rapportage	Montréal(06)	Montréal (66 )	1	0	0	0	0	0	0	0	0	0	0	0	1
SPVM _ 2012 _ 10475	VE	2012/01/27	66023	3422			STANLEY				31		12		2		14		12	34		1				14	2	0	0	0	19:00:00-19:59:00	2012	0	Dommages matériels seulement	Montréal(06)	Montréal (66 )	1	0	0	0	0	0	0	0	0	0	0	0	1
SPVM _ 2012 _ 10476	VE	2012/01/27	66023	1650			CEDAR				31		11	1	3		21		11			9				11	2	0	0	0	08:00:00-08:59:00	2012	0	Dommages matériels seulement	Montréal(06)	Montréal (66 )	2	0	0	0	0	0	0	0	0	0	0	0	0
SPVM _ 2012 _ 10477	DI	2012/01/29	66023					1	RENE LEVESQUE		31		11	1	3		13		11	32		3				11	2	0	0	0	13:00:00-13:59:00	2012	0	Dommages matériels seulement	Montréal(06)	Montréal (66 )	2	0	0	0	0	0	0	0	0	0	0	0	0
SPVM _ 2012 _ 10478	DI	2012/01/29	66023				WELLINGTON	1	PEEL	15	31		17	1	3		14		11	33		2			O	11	2	0	0	0	14:00:00-14:59:00	2012	0	Dommages matériels inférieurs au seuil de rapportage	Montréal(06)	Montréal (66 )	1	0	0	0	0	0	0	0	0	0	0	0	1
SPVM _ 2012 _ 10479	DI	2012/01/29	66023				DE LA MONTAGNE	1	RENE LEVESQUE				11	1	3		12		11	33		2					2	0	0	0	Non précisé	2012	0	Dommages matériels inférieurs au seuil de rapportage	Montréal(06)	Montréal (66 )	1	0	0	0	0	0	0	0	0	0	0	0	1
SPVM _ 2012 _ 1048	LU	2012/11/12	66142				TERR MTL				31		11													11	2	0	0	0	Non précisé	2012	0	Dommages matériels inférieurs au seuil de rapportage	Montréal(06)	Montréal (66 )	1	0	0	0	0	0	0	0	0	0	0	0	1
SPVM _ 2012 _ 10480	LU	2012/01/30	66023				MONT ROYAL	1	CAMILIEN HOULE		40		11	1	2		14	1	13	32	6	1				11	1	0	0	1	12:00:00-12:59:00	2012	1	Léger	Montréal(06)	Montréal (66 )	0	1	0	0	0	0	0	0	0	0	0	0	0
SPVM _ 2012 _ 10481	MA	2012/01/31	66023	2100			CAMILIEN HOUDE	1	MT ROYAL	900			18	3	7		13		13	34		2			O	17	1	0	0	0	Non précisé	2012	0	Dommages matériels seulement	Montréal(06)	Montréal (66 )	1	0	0	0	0	0	0	0	0	0	0	0	0
SPVM _ 2012 _ 10482	JE	2012/01/26	66023				SHERBROOKE		GUY		31		16	1	3		13		11	34		3				17	2	0	0	0	12:00:00-12:59:00	2012	0	Dommages matériels inférieurs au seuil de rapportage	Montréal(06)	Montréal (66 )	1	0	0	0	0	0	0	0	0	0	0	0	1
SPVM _ 2012 _ 10483	MA	2012/01/31	66023					1	GAUCHETIERE ET UNIVERSITY				16	1	3		19		14	33		3				17	2	0	0	0	13:00:00-13:59:00	2012	0	Dommages matériels inférieurs au seuil de rapportage	Montréal(06)	Montréal (66 )	2	0	0	0	0	0	0	0	0	0	0	0	0
SPVM _ 2012 _ 10484	MA	2012/01/31	66023					1	DRUMMOND ET RENE LEVESQUE				12	1	3		19		11	32		1				17	2	0	0	0	14:00:00-14:59:00	2012	0	Dommages matériels inférieurs au seuil de rapportage	Montréal(06)	Montréal (66 )	1	1	0	0	0	0	0	0	0	0	0	0	0
SPVM _ 2012 _ 10485	MA	2012/01/31	66023				RENE LEVESQUE O	1	UNIVERSITY				16	2	3		13		11	32		5				17	2	0	0	0	Non précisé	2012	0	Dommages matériels inférieurs au seuil de rapportage	Montréal(06)	Montréal (66 )	1	0	0	0	0	0	0	1	0	0	0	0	0
SPVM _ 2012 _ 10486	VE	2012/01/13	66023	2000			MANSFIELD		SHERBROOKE O	75	31		16	3	3		13		11	34		1			N	12	2	0	0	0	17:00:00-17:59:00	2012	0	Dommages matériels seulement	Montréal(06)	Montréal (66 )	1	0	0	0	0	0	0	0	0	0	0	0	1
SPVM _ 2012 _ 10487	MA	2012/01/31	66023	687			DES PINS						16	3	9		21		12			2			O	17	2	0	0	0	Non précisé	2012	0	Dommages matériels seulement	Montréal(06)	Montréal (66 )	2	0	0	0	0	0	0	0	0	0	0	0	0
SPVM _ 2012 _ 10488	MA	2012/01/31	66023	951			WILLIAM	2	WILLIAM				16	3	3		19		11	32		1				11	2	0	0	0	22:00:00-22:59:00	2012	0	Dommages matériels inférieurs au seuil de rapportage	Montréal(06)	Montréal (66 )	1	0	0	0	0	0	0	0	0	0	0	0	1
SPVM _ 2012 _ 10489	MA	2012/01/31	66023	1456			OVERDALE				31		16	3	3		13		13	33						17	2	0	0	0	22:00:00-22:59:00	2012	0	Dommages matériels inférieurs au seuil de rapportage	Montréal(06)	Montréal (66 )	2	0	0	0	0	0	0	0	0	0	0	0	0
SPVM _ 2012 _ 1049	ME	2012/11/14	66142				ST JEAN	1	HARRIS	100	31		11	1	3		13		11	34		3			S	11	2	0	0	0	Non précisé	2012	0	Dommages matériels seulement	Montréal(06)	Montréal (66 )	2	0	0	0	0	0	0	0	0	0	0	0	0
SPVM _ 2012 _ 10490	MA	2012/01/31	66023	2100			CAMILIEN HOUDE			5	31		16	3	7		22	1	11						N	17	2	0	0	2	22:00:00-22:59:00	2012	2	Léger	Montréal(06)	Montréal (66 )	2	0	0	0	0	0	0	0	0	0	0	0	0
SPVM _ 2012 _ 10491	ME	2012/02/01	66023				RENE LEVESQUE	1	UNIVERSITY		31	9	18	3	3		13		11	32		3				19	2	0	0	0	03:00:00-03:59:00	2012	0	Dommages matériels seulement	Montréal(06)	Montréal (66 )	2	0	0	0	0	0	0	0	0	0	0	0	0
SPVM _ 2012 _ 10492	ME	2012/02/01	66023				PEEL	1	RENE LEVESQUE		31		12	1	3		13		11	32		5				12	2	0	0	0	09:00:00-09:59:00	2012	0	Dommages matériels inférieurs au seuil de rapportage	Montréal(06)	Montréal (66 )	1	0	0	0	0	0	0	1	0	0	0	0	0
SPVM _ 2012 _ 10493	MA	2012/01/31	66023	727			LUSIGNAN OPP DU						16	3			14		11	34		1				17	2	0	0	0	20:00:00-20:59:00	2012	0	Dommages matériels inférieurs au seuil de rapportage	Montréal(06)	Montréal (66 )	1	0	0	0	0	0	0	0	0	0	0	0	1
SPVM _ 2012 _ 10494	MA	2012/01/31	66023				STE CATHERINE O	1	PEEL	20			16	1	3		13		11	33		1			O	12	2	0	0	0	12:00:00-12:59:00	2012	0	Dommages matériels inférieurs au seuil de rapportage	Montréal(06)	Montréal (66 )	1	0	0	0	0	0	0	0	0	0	0	0	1
SPVM _ 2012 _ 10495	JE	2012/02/02	66023	2149			MACKAY	1	SHERBROOKE	100	31		16	1	1		14		11	34		1			S	11	2	0	0	0	08:00:00-08:59:00	2012	0	Dommages matériels inférieurs au seuil de rapportage	Montréal(06)	Montréal (66 )	1	0	0	0	0	0	0	0	0	0	0	0	1
SPVM _ 2012 _ 10496	JE	2012/02/02	66023					1	MAISONNEUVE		31		12	1	3		13	1	11	32	6	3				11	3	0	0	1	12:00:00-12:59:00	2012	1	Léger	Montréal(06)	Montréal (66 )	3	0	0	0	0	0	0	0	0	0	0	0	0
SPVM _ 2012 _ 10497	MA	2012/01/31	66023				RENE LEVESQUE		PEEL		31		16	3	3		13		11	32		5				17	2	0	0	0	17:00:00-17:59:00	2012	0	Dommages matériels inférieurs au seuil de rapportage	Montréal(06)	Montréal (66 )	2	0	0	0	0	0	0	0	0	0	0	0	0
SPVM _ 2012 _ 10498	ME	2012/02/01	66023				WILLIAMS	1	PEEL	1	31		12	1	2		19		11	32		1	1		E	11	2	0	0	0	21:00:00-21:59:00	2012	0	Dommages matériels seulement	Montréal(06)	Montréal (66 )	1	0	0	0	0	0	0	0	0	0	0	1	0
SPVM _ 2012 _ 10499	JE	2012/02/02	66023					1	PRINCE ET WELLINGTON		33		15	2	2		14		11	32		2				12	2	0	0	0	16:00:00-16:59:00	2012	0	Dommages matériels inférieurs au seuil de rapportage	Montréal(06)	Montréal (66 )	1	0	0	0	1	0	0	0	0	0	0	0	0
SPVM _ 2012 _ 105	LU	2012/02/27	66023																								2	0	0	0	15:00:00-15:59:00	2012	0	Dommages matériels inférieurs au seuil de rapportage	Montréal(06)	Montréal (66 )	1	0	0	0	0	0	0	0	0	0	0	0	1
SPVM _ 2012 _ 1050	VE	2012/11/16	66142				BD ST JEAN	1	BLUE HAVEN		31		11	3	3		13		11	32		3				11	4	0	0	0	23:00:00-23:59:00	2012	0	Dommages matériels seulement	Montréal(06)	Montréal (66 )	3	0	0	0	0	0	0	0	0	0	0	0	1
SPVM _ 2012 _ 10500	ME	2012/02/01	66023				STE CATHERINE	1	GUY	25	31		16	3	3		14		11	33		1			E	17	2	0	0	0	Non précisé	2012	0	Dommages matériels inférieurs au seuil de rapportage	Montréal(06)	Montréal (66 )	1	0	0	0	0	0	0	0	0	0	0	0	1
SPVM _ 2012 _ 10501	ME	2012/02/01	66023	1060			UNIVERSITY				31		16	1	3		13		13	33		3				11	2	0	0	0	13:00:00-13:59:00	2012	0	Dommages matériels inférieurs au seuil de rapportage	Montréal(06)	Montréal (66 )	1	0	0	0	0	0	0	0	0	0	0	0	1
SPVM _ 2012 _ 10502	ME	2012/01/18	66023				ST JACQUES	1	PEEL	20	31			3			13		11	33		1			E	12	2	0	0	0	19:00:00-19:59:00	2012	0	Dommages matériels seulement	Montréal(06)	Montréal (66 )	1	0	0	0	0	0	0	0	0	0	0	0	1
SPVM _ 2012 _ 10503	VE	2012/02/03	66023				STE CATHERINE	1	PEEL	10	31		12	2	3		13		11	33		1			E	17	2	0	0	0	17:00:00-17:59:00	2012	0	Dommages matériels inférieurs au seuil de rapportage	Montréal(06)	Montréal (66 )	1	0	0	0	0	0	0	0	1	0	0	0	0
SPVM _ 2012 _ 10504	JE	2012/02/02	66023	3488			COTE DES NEIGES		SUMMERHILL		31		12	3	2		14		11	33		2				12	2	0	0	0	Non précisé	2012	0	Dommages matériels inférieurs au seuil de rapportage	Montréal(06)	Montréal (66 )	1	0	0	0	0	0	0	0	0	0	0	0	1
SPVM _ 2012 _ 10505	JE	2012/02/02	66023				ARGYLE	1	GUY	75	31		16	3	2		14		11	34		1			E	12	2	0	0	0	19:00:00-19:59:00	2012	0	Dommages matériels inférieurs au seuil de rapportage	Montréal(06)	Montréal (66 )	1	0	0	0	0	0	0	0	0	0	0	0	1
SPVM _ 2012 _ 10506	SA	2012/02/04	66023	1005			GUY				31		11		3		19		13	34		2					2	0	0	0	Non précisé	2012	0	Dommages matériels seulement	Montréal(06)	Montréal (66 )	1	0	0	0	0	0	0	0	0	0	0	0	1
SPVM _ 2012 _ 10507	JE	2012/02/02	66023	1455			METCALFE				31		11	1	9		21		11	99		9				99	2	0	0	0	15:00:00-15:59:00	2012	0	Dommages matériels seulement	Montréal(06)	Montréal (66 )	1	0	0	0	0	0	0	0	0	0	0	0	1
SPVM _ 2012 _ 10508	LU	2012/02/06	66023				SHERBOOKE	1	CITY COUNCILLORS		33		12	1	3	138	12	1	11	32	6	3			O	11	2	0	0	1	12:00:00-12:59:00	2012	1	Léger	Montréal(06)	Montréal (66 )	1	0	0	0	1	0	0	0	0	0	0	0	0
SPVM _ 2012 _ 10509	LU	2012/02/06	66023				UNIVERSITY		RENE LEVESQUE O		31		11	1	3		19		12	34		3				11	2	0	0	0	08:00:00-08:59:00	2012	0	Dommages matériels seulement	Montréal(06)	Montréal (66 )	2	0	0	0	0	0	0	0	0	0	0	0	0
SPVM _ 2012 _ 1051	VE	2012/11/16	66142				HYMAN	1	BD DES SOURCES		31		11	3	3		13		11	32		3				11	2	0	0	0	02:00:00-02:59:00	2012	0	Dommages matériels seulement	Montréal(06)	Montréal (66 )	2	0	0	0	0	0	0	0	0	0	0	0	0
SPVM _ 2012 _ 10510	LU	2012/02/06	66023	1650			AV CEDAR				31		12	1	3		13		11	34		3			O	12	2	0	0	0	11:00:00-11:59:00	2012	0	Dommages matériels inférieurs au seuil de rapportage	Montréal(06)	Montréal (66 )	1	0	0	0	0	0	0	0	0	0	0	0	1
SPVM _ 2012 _ 10511	LU	2012/02/06	66023	1001			MAISONNEUVE						11	1	3		21		11	99		1				11	2	0	0	0	Non précisé	2012	0	Dommages matériels seulement	Montréal(06)	Montréal (66 )	1	0	0	0	0	0	0	0	0	0	0	0	1
SPVM _ 2012 _ 10512	LU	2012/02/06	66023								31																2	0	0	0	Non précisé	2012	0	Dommages matériels inférieurs au seuil de rapportage	Montréal(06)	Montréal (66 )	1	0	0	0	0	0	0	0	0	0	0	0	1
SPVM _ 2012 _ 10513	MA	2012/02/07	66023	1260			REMEMBRANCE				31		11	1	7		21			99		9				11	2	0	0	0	15:00:00-15:59:00	2012	0	Dommages matériels seulement	Montréal(06)	Montréal (66 )	2	0	0	0	0	0	0	0	0	0	0	0	0
SPVM _ 2012 _ 10514	ME	2012/02/08	66023	1307			ST CATHERINE O				31		11	1	3		13		11	34		1				11	2	0	0	0	09:00:00-09:59:00	2012	0	Dommages matériels seulement	Montréal(06)	Montréal (66 )	0	1	0	0	0	0	0	1	0	0	0	0	0
SPVM _ 2012 _ 10515	VE	2012/01/27	66023				PEEL	1	SHERBROOKE	20			16	3	3		13		11	33		2			S	99	2	0	0	0	19:00:00-19:59:00	2012	0	Dommages matériels inférieurs au seuil de rapportage	Montréal(06)	Montréal (66 )	1	0	0	0	0	0	0	0	0	0	0	0	1
SPVM _ 2012 _ 10516	ME	2012/02/08	66023				ST JACQUES	1	MANSFIELD		31		11	1	3		13		11	32		3				11	2	0	0	0	14:00:00-14:59:00	2012	0	Dommages matériels seulement	Montréal(06)	Montréal (66 )	2	0	0	0	0	0	0	0	0	0	0	0	0
SPVM _ 2012 _ 10517	VE	2012/02/03	66023				MONTAGNE	1	MAISONNEUVE	10	31			1			13		11	33		2			N		2	0	0	0	Non précisé	2012	0	Dommages matériels inférieurs au seuil de rapportage	Montréal(06)	Montréal (66 )	1	0	0	0	0	0	0	0	0	0	0	0	1
SPVM _ 2012 _ 10518	ME	2012/02/08	66023					1	GUY ET MAISONNEUVE	20	32		11	3	3		13	1	13	33	6	3			N	11	1	0	0	1	20:00:00-20:59:00	2012	1	Léger	Montréal(06)	Montréal (66 )	1	0	0	0	0	0	0	0	0	0	0	0	0
SPVM _ 2012 _ 10519	JE	2012/02/09	66023	3940			COTE DES NEIGES GARAGE				59		11	1	2		22		11	99		2				11	1	0	0	0	09:00:00-09:59:00	2012	0	Dommages matériels seulement	Montréal(06)	Montréal (66 )	1	0	0	0	0	0	0	0	0	0	0	0	0
SPVM _ 2012 _ 1052	SA	2012/11/17	66142	186			ROGER PILON				31		11	3	2		14		11	32		2				11	2	0	0	0	Non précisé	2012	0	Dommages matériels inférieurs au seuil de rapportage	Montréal(06)	Montréal (66 )	1	0	0	0	0	0	0	0	0	0	0	0	1
SPVM _ 2012 _ 10520	ME	2012/02/08	66023	691			CATHCART				31		11	1	3		13		11	33		2				11	2	0	0	0	10:00:00-10:59:00	2012	0	Dommages matériels inférieurs au seuil de rapportage	Montréal(06)	Montréal (66 )	2	0	0	0	0	0	0	0	0	0	0	0	0
SPVM _ 2012 _ 10521	JE	2012/02/09	66023				DRUMMOND	1	MAISONNEUVE		31		11	1	3		13		11	32		1				11	2	0	0	0	12:00:00-12:59:00	2012	0	Dommages matériels inférieurs au seuil de rapportage	Montréal(06)	Montréal (66 )	2	0	0	0	0	0	0	0	0	0	0	0	0
SPVM _ 2012 _ 10522	JE	2012/02/09	66023				UNIVERSITE	1	ST JACQUES		32		11	1	3		13	1	11	32	6	4				11	1	0	0	1	13:00:00-13:59:00	2012	1	Léger	Montréal(06)	Montréal (66 )	1	0	0	0	0	0	0	0	0	0	0	0	0
SPVM _ 2012 _ 10523	JE	2012/02/09	66023				RENE LEVESQUE	1	UNIVERSITY		33		11	1	3		13	1	11	33		3				11	2	0	0	1	14:00:00-14:59:00	2012	1	Léger	Montréal(06)	Montréal (66 )	1	0	0	0	1	0	0	0	0	0	0	0	0
SPVM _ 2012 _ 10524	JE	2012/02/09	66023				BD RENE LEVESQUE O	1	UNIVERSITY		31		11	1	3		13		11	32		1				11	2	0	0	0	Non précisé	2012	0	Dommages matériels inférieurs au seuil de rapportage	Montréal(06)	Montréal (66 )	0	0	0	0	0	0	0	0	1	0	0	0	1
SPVM _ 2012 _ 10525	JE	2012/02/09	66023				DE LA MONTAGNE	1	STE CATHERINE		31			3	3		13			32		2					2	0	0	0	00:00:00-00:59:00	2012	0	Dommages matériels inférieurs au seuil de rapportage	Montréal(06)	Montréal (66 )	2	0	0	0	0	0	0	0	0	0	0	0	0
SPVM _ 2012 _ 10526	DI	2012/01/08	66023				BISHOP	1	UNIVERSITY	25	31		12	3	3		13		11	33		1			N	12	2	0	0	0	Non précisé	2012	0	Dommages matériels seulement	Montréal(06)	Montréal (66 )	1	0	0	0	0	0	0	0	0	0	0	0	1
SPVM _ 2012 _ 10527	VE	2012/02/10	66023				GUY	1	ARGYLE		31		14	3	3		13	1	12	32	6	2				11	2	0	0	0	17:00:00-17:59:00	2012	0	Dommages matériels inférieurs au seuil de rapportage	Montréal(06)	Montréal (66 )	1	0	0	0	0	0	0	0	1	0	0	0	0
SPVM _ 2012 _ 10528	VE	2012/02/10	66023				RENE LEVESQUE	1	GUY		32		12	3	3		13	1	11	32	6	3				14	1	0	0	1	23:00:00-23:59:00	2012	1	Léger	Montréal(06)	Montréal (66 )	1	0	0	0	0	0	0	0	0	0	0	0	0
SPVM _ 2012 _ 10529	SA	2012/02/11	66023				ST ANTOINE	1	LUCIEN L ALLIER		31	1	16	3	3		13	1	11	32	6	1				17	2	0	0	3	00:00:00-00:59:00	2012	3	Léger	Montréal(06)	Montréal (66 )	1	0	0	0	0	0	0	1	0	0	0	0	0
SPVM _ 2012 _ 1053	VE	2012/11/16	66142	6			HOWARD				31		11	1	1		21		11	99		9				11	2	0	0	0	07:00:00-07:59:00	2012	0	Dommages matériels inférieurs au seuil de rapportage	Montréal(06)	Montréal (66 )	1	0	0	0	0	0	0	0	0	0	0	0	1
SPVM _ 2012 _ 10530	SA	2012/02/11	66023				DR PENFIELD	2	PEEL	20	31		18	3	2		13								E	17	2	0	0	0	01:00:00-01:59:00	2012	0	Dommages matériels inférieurs au seuil de rapportage	Montréal(06)	Montréal (66 )	2	0	0	0	0	0	0	0	0	0	0	0	0
SPVM _ 2012 _ 10531	SA	2012/02/11	66023				N-D	1	UNIVERSITY	20			11	2	3		13		11	33		2			O	11	2	0	0	0	01:00:00-01:59:00	2012	0	Dommages matériels inférieurs au seuil de rapportage	Montréal(06)	Montréal (66 )	1	0	0	0	0	0	0	0	0	0	0	0	1
SPVM _ 2012 _ 10532	SA	2012/02/11	66023				ST PAUL	1	NAZARETH		47		11	2	3		14		11	39		1				11	1	0	0	0	16:00:00-16:59:00	2012	0	Dommages matériels seulement	Montréal(06)	Montréal (66 )	0	1	0	0	0	0	0	0	0	0	0	0	0
SPVM _ 2012 _ 10533	SA	2012/02/11	66023	1529			SHERBROOKE O (ARR)				31		11	3	3		22		12	99		1				11	2	0	0	0	17:00:00-17:59:00	2012	0	Dommages matériels inférieurs au seuil de rapportage	Montréal(06)	Montréal (66 )	1	0	0	0	0	0	0	0	0	0	0	0	1
SPVM _ 2012 _ 10534	DI	2012/02/12	66023				STE CATHERINE O	1	UNIVERSITY	20	31		18	3	3		13		11	32		1			E	11	2	0	0	0	01:00:00-01:59:00	2012	0	Dommages matériels seulement	Montréal(06)	Montréal (66 )	2	0	0	0	0	0	0	0	0	0	0	0	0
SPVM _ 2012 _ 10535	DI	2012/02/12	66023	1085			ST ALEXANDRE			40	31		18		2		15		13	33		1			S	99	4	0	0	0	19:00:00-19:59:00	2012	0	Dommages matériels seulement	Montréal(06)	Montréal (66 )	3	0	0	0	0	0	0	0	0	0	0	0	1
SPVM _ 2012 _ 10536	LU	2012/02/13	66023				RENE LEVESQUE	1	DE LA MONTAGNE				11	1	3		13		11	32		3				11	2	0	0	0	13:00:00-13:59:00	2012	0	Dommages matériels seulement	Montréal(06)	Montréal (66 )	2	0	0	0	0	0	0	0	0	0	0	0	0
SPVM _ 2012 _ 10537	VE	2012/02/10	66023				AYLMER	1	STE CATHERINE	30	31		16	2	3		14		13	99		1			N	12	2	0	0	0	16:00:00-16:59:00	2012	0	Dommages matériels seulement	Montréal(06)	Montréal (66 )	1	0	0	0	0	0	0	0	0	0	0	0	1
SPVM _ 2012 _ 10538	LU	2012/02/13	66023	1650			CEDAR				31		11		9		21		11							11	2	0	0	0	Non précisé	2012	0	Dommages matériels inférieurs au seuil de rapportage	Montréal(06)	Montréal (66 )	1	0	0	0	0	0	0	0	0	0	0	0	1
SPVM _ 2012 _ 10539	LU	2012/02/13	66023	400			DE L INSPECTEUR				31		11	2	2		21		11	99		9				99	2	0	0	0	20:00:00-20:59:00	2012	0	Dommages matériels inférieurs au seuil de rapportage	Montréal(06)	Montréal (66 )	2	0	0	0	0	0	0	0	0	0	0	0	0
SPVM _ 2012 _ 1054	DI	2012/11/18	66142				BD DE SALABERRY	1	THORNHILL	30	50		11	1	2		13		21	33		2			E	11	1	0	0	0	15:00:00-15:59:00	2012	0	Dommages matériels inférieurs au seuil de rapportage	Montréal(06)	Montréal (66 )	1	0	0	0	0	0	0	0	0	0	0	0	0
SPVM _ 2012 _ 10540	LU	2012/02/13	66023				MAISONNEUVE O	1	MANSFIELD	10	31		11	3	3		13		11	32		1			O	11	2	0	0	0	19:00:00-19:59:00	2012	0	Dommages matériels inférieurs au seuil de rapportage	Montréal(06)	Montréal (66 )	2	0	0	0	0	0	0	0	0	0	0	0	0
SPVM _ 2012 _ 10541	LU	2012/02/13	66023	1501			MCGILL COLLEGE				31				3		21		11								2	0	0	0	Non précisé	2012	0	Dommages matériels inférieurs au seuil de rapportage	Montréal(06)	Montréal (66 )	1	0	0	0	0	0	0	0	0	0	0	0	1
SPVM _ 2012 _ 10542	ME	2012/02/15	66023					1	1245 DRUMMOND		31		12	1	3		14		11	34		1				12	2	0	0	0	09:00:00-09:59:00	2012	0	Dommages matériels inférieurs au seuil de rapportage	Montréal(06)	Montréal (66 )	2	0	0	0	0	0	0	0	0	0	0	0	0
SPVM _ 2012 _ 10543	ME	2012/02/15	66023	1650			CEDAR	1	COTE DES NEIGES	100	31	1	11	1	9		21		11	99		9			O	11	3	0	0	0	15:00:00-15:59:00	2012	0	Dommages matériels seulement	Montréal(06)	Montréal (66 )	3	0	0	0	0	0	0	0	0	0	0	0	0
SPVM _ 2012 _ 10544	ME	2012/02/15	66023	1400			ST JACQUES	1	LUCIEN LALLIER	20	31		12	3	2		14	1	11	33	6	1			O	14	9	0	0	1	21:00:00-21:59:00	2012	1	Léger	Montréal(06)	Montréal (66 )	9	0	0	0	0	0	0	0	0	0	0	0	0
SPVM _ 2012 _ 10545	JE	2012/02/16	66023				RENE LEVESQUE ET MONTAGNE				31		12	1	3		13		11	32		3				11	2	0	0	0	07:00:00-07:59:00	2012	0	Dommages matériels seulement	Montréal(06)	Montréal (66 )	0	1	0	0	0	0	0	0	1	0	0	0	0
SPVM _ 2012 _ 10546	ME	2012/02/15	66023				UNIVERSITE	1	DE LA GAUCHETIERE		31		12	1	3		14		11	33		3				11	2	0	0	0	17:00:00-17:59:00	2012	0	Dommages matériels inférieurs au seuil de rapportage	Montréal(06)	Montréal (66 )	1	0	0	1	0	0	0	0	0	0	0	0	0
SPVM _ 2012 _ 10547	VE	2012/02/10	66023	1801			MCGILL COLLEGE						11	1	3		21		11	99		9				11	2	0	0	0	09:00:00-09:59:00	2012	0	Dommages matériels inférieurs au seuil de rapportage	Montréal(06)	Montréal (66 )	1	0	0	0	0	0	0	0	0	0	0	0	1
SPVM _ 2012 _ 10548	JE	2012/02/16	66023				SIMPSON	1	PL CHELSEA		31		12	3	2		14		13	32		1				14	2	0	0	0	21:00:00-21:59:00	2012	0	Dommages matériels seulement	Montréal(06)	Montréal (66 )	1	0	0	0	0	0	0	0	0	0	0	0	1
SPVM _ 2012 _ 10549	LU	2012/02/13	66023	1650			CEDAR				31		12	1	4		21		11	99		1				12	2	0	0	0	11:00:00-11:59:00	2012	0	Dommages matériels seulement	Montréal(06)	Montréal (66 )	1	0	0	0	0	0	0	0	0	0	0	0	1
SPVM _ 2012 _ 1055	LU	2012/11/19	66142				LAKE	1	HYMAN	5	32		11	1	2		14		11	32		2			S	11	1	0	0	0	12:00:00-12:59:00	2012	0	Dommages matériels seulement	Montréal(06)	Montréal (66 )	1	0	0	0	0	0	0	0	0	0	0	0	0
SPVM _ 2012 _ 10550	VE	2012/02/17	66023				STANLEY	1	DR PENFIELD	50	31		11	1	2		14		13	34		1			S	12	2	0	0	0	11:00:00-11:59:00	2012	0	Dommages matériels inférieurs au seuil de rapportage	Montréal(06)	Montréal (66 )	2	0	0	0	0	0	0	0	0	0	0	0	0
SPVM _ 2012 _ 10551	JE	2012/02/16	66023				MC GILL COLLEGE	1	SHERBROOKE		31		12	3	3		13		11	32		1				12	2	0	0	0	23:00:00-23:59:00	2012	0	Dommages matériels inférieurs au seuil de rapportage	Montréal(06)	Montréal (66 )	1	0	0	0	0	0	0	1	0	0	0	0	0
SPVM _ 2012 _ 10552	VE	2012/02/17	66023					1	ST ALEXANDRE ET RENE LEVESQUE	6	31		11	3	3		13	1	11	33		3			E	11	3	0	0	0	19:00:00-19:59:00	2012	0	Dommages matériels seulement	Montréal(06)	Montréal (66 )	3	0	0	0	0	0	0	0	0	0	0	0	0
SPVM _ 2012 _ 10553	VE	2012/02/17	66023				ST ANTOINE	1	MANFIELD				11	3	3		13		13							11	2	0	0	0	23:00:00-23:59:00	2012	0	Dommages matériels seulement	Montréal(06)	Montréal (66 )	1	0	0	0	0	0	0	1	0	0	0	0	0
SPVM _ 2012 _ 10554	SA	2012/02/18	66023	228	B		PEEL				31		12	3	2		14		11	34		3			O	11	2	0	0	0	03:00:00-03:59:00	2012	0	Dommages matériels inférieurs au seuil de rapportage	Montréal(06)	Montréal (66 )	1	0	0	0	0	0	0	0	0	0	0	0	1
SPVM _ 2012 _ 10555	DI	2012/02/19	66023				PEEL	1	ST JACQUES		31		11	1	3		13	1	11	32	6	3			S	11	2	0	0	1	13:00:00-13:59:00	2012	1	Léger	Montréal(06)	Montréal (66 )	2	0	0	0	0	0	0	0	0	0	0	0	0
SPVM _ 2012 _ 10556	LU	2012/02/20	66023				SHERBROOKE	1	PEEL		31		11	3	2		13		11	33		3				11	2	0	0	0	02:00:00-02:59:00	2012	0	Dommages matériels seulement	Montréal(06)	Montréal (66 )	1	0	0	0	0	0	0	1	0	0	0	0	0
SPVM _ 2012 _ 10557	VE	2012/01/20	66023				UNION	1	STE CATHERINE	5	31		11	1	3		14		11	32		1			N	11	2	0	0	0	Non précisé	2012	0	Dommages matériels inférieurs au seuil de rapportage	Montréal(06)	Montréal (66 )	2	0	0	0	0	0	0	0	0	0	0	0	0
SPVM _ 2012 _ 10558	LU	2012/02/20	66023				BEAVER HALL	1	RENE LEVESQUE	100	31		11	1	3		13		11	34		2			S	11	2	0	0	0	10:00:00-10:59:00	2012	0	Dommages matériels inférieurs au seuil de rapportage	Montréal(06)	Montréal (66 )	1	1	0	0	0	0	0	0	0	0	0	0	0
SPVM _ 2012 _ 10559	VE	2012/02/17	66023	687			AV DES PINS				31				3		21			99							2	0	0	0	20:00:00-20:59:00	2012	0	Dommages matériels seulement	Montréal(06)	Montréal (66 )	1	0	0	0	0	0	0	0	0	0	0	0	1
SPVM _ 2012 _ 1056	LU	2012/11/19	66142				SHAKESPEARE	1	CHARADE		31		11	2	2		14	1	11	32	6	2				11	2	0	0	1	16:00:00-16:59:00	2012	1	Léger	Montréal(06)	Montréal (66 )	2	0	0	0	0	0	0	0	0	0	0	0	0
SPVM _ 2012 _ 10560	MA	2012/02/21	66023	1529			AV CEDAR	2	HOP SREINER	15	31		11	1	3		14		22	34		2			S	11	2	0	0	0	14:00:00-14:59:00	2012	0	Dommages matériels inférieurs au seuil de rapportage	Montréal(06)	Montréal (66 )	2	0	0	0	0	0	0	0	0	0	0	0	0
SPVM _ 2012 _ 10561	MA	2012/02/21	66023				ST PAUL	1	INSPECTEUR				11		2		14		11	33		1				11	2	0	0	0	16:00:00-16:59:00	2012	0	Dommages matériels seulement	Montréal(06)	Montréal (66 )	2	0	0	0	0	0	0	0	0	0	0	0	0
SPVM _ 2012 _ 10562	ME	2012/02/22	66023	1175			UNION	1	RENE LEVESQUE	20	31		12	1	3		13		11	33		1			N	14	2	0	0	0	15:00:00-15:59:00	2012	0	Dommages matériels seulement	Montréal(06)	Montréal (66 )	1	1	0	0	0	0	0	0	0	0	0	0	0
SPVM _ 2012 _ 10563	ME	2012/02/22	66023				ST HENRI	1	WILLIAM		31		11	3	2		14		11	32		1				11	2	0	0	0	21:00:00-21:59:00	2012	0	Dommages matériels inférieurs au seuil de rapportage	Montréal(06)	Montréal (66 )	1	0	0	0	0	0	0	0	0	0	0	0	1
SPVM _ 2012 _ 10564	ME	2012/02/22	66023				UNIVERSITE	1	ST ANTOINE		31		12	1	3		13		13	32		5				12	2	0	0	0	16:00:00-16:59:00	2012	0	Dommages matériels seulement	Montréal(06)	Montréal (66 )	1	0	0	0	0	0	0	0	1	0	0	0	0
SPVM _ 2012 _ 10565	ME	2012/02/22	66023				GUY	1	ST ANTOINE		31		12	1	3		13	1	13	32	6	3			N	12	2	0	0	1	16:00:00-16:59:00	2012	1	Léger	Montréal(06)	Montréal (66 )	2	0	0	0	0	0	0	0	0	0	0	0	0
SPVM _ 2012 _ 10566	ME	2012/02/22	66023				GUY	1	ST ANTOINE		31		12	1	3		13		13	32		3			N	12	2	0	0	0	17:00:00-17:59:00	2012	0	Dommages matériels inférieurs au seuil de rapportage	Montréal(06)	Montréal (66 )	2	0	0	0	0	0	0	0	0	0	0	0	0
SPVM _ 2012 _ 10567	ME	2012/02/22	66023				ST JACQUES	1	MONTAGNE		31		11	3	2		13		11	32		1			N	11	2	0	0	0	18:00:00-18:59:00	2012	0	Dommages matériels seulement	Montréal(06)	Montréal (66 )	1	0	0	0	0	0	0	0	1	0	0	0	0
SPVM _ 2012 _ 10568	JE	2012/02/23	66023				MACKAY	1	OVERDALE		51		11	1	2		14		11	32						11	2	0	0	0	08:00:00-08:59:00	2012	0	Dommages matériels seulement	Montréal(06)	Montréal (66 )	1	0	0	0	0	0	0	0	0	0	0	0	1
SPVM _ 2012 _ 10569	JE	2012/02/23	66023				DRUMMOND	1	SHERBROOKE	200	31		12	1	2		14		13	34		2	2		N	12	2	0	0	0	14:00:00-14:59:00	2012	0	Dommages matériels inférieurs au seuil de rapportage	Montréal(06)	Montréal (66 )	2	0	0	0	0	0	0	0	0	0	0	0	0
SPVM _ 2012 _ 1057	LU	2012/11/19	66142	3291			DES SOURCES	2	STAT SUPER C		31		11	1	3		21		11							11	2	0	0	0	Non précisé	2012	0	Dommages matériels inférieurs au seuil de rapportage	Montréal(06)	Montréal (66 )	1	0	0	0	0	0	0	0	0	0	0	0	1
SPVM _ 2012 _ 10570	VE	2012/02/24	66023	650			STE CATHERINE O				31		11	3	3		13		11	33		1				11	2	0	0	0	02:00:00-02:59:00	2012	0	Dommages matériels inférieurs au seuil de rapportage	Montréal(06)	Montréal (66 )	1	0	0	0	0	0	0	1	0	0	0	0	0
SPVM _ 2012 _ 10571	VE	2012/02/24	66023				ST ANTOINE	1	DE LA MONTAGNE				16	3	3		12		11	32		1				17	1	0	0	0	21:00:00-21:59:00	2012	0	Dommages matériels seulement	Montréal(06)	Montréal (66 )	1	0	0	0	0	0	0	0	0	0	0	0	0
SPVM _ 2012 _ 10572	VE	2012/02/24	66023	1115			MAISONNEUVE O				31		12	3	3		13		11	99		1				99	2	0	0	0	22:00:00-22:59:00	2012	0	Dommages matériels inférieurs au seuil de rapportage	Montréal(06)	Montréal (66 )	2	0	0	0	0	0	0	0	0	0	0	0	0
SPVM _ 2012 _ 10573	SA	2012/02/25	66023	1449			CRESCENT				31		17	3	3		12		11	34		1				17	2	0	0	0	00:00:00-00:59:00	2012	0	Dommages matériels inférieurs au seuil de rapportage	Montréal(06)	Montréal (66 )	1	0	1	0	0	0	0	0	0	0	0	0	0
SPVM _ 2012 _ 10574	SA	2012/02/25	66023					1	YOUNG ET WILLIAM	20	31		16	3	3		14		11	33		1				17	2	0	0	0	01:00:00-01:59:00	2012	0	Dommages matériels seulement	Montréal(06)	Montréal (66 )	1	0	1	0	0	0	0	0	0	0	0	0	0
SPVM _ 2012 _ 10575	DI	2012/02/26	66023	4035			ST AMBROISE						16	2	2		14		11	34		2				11	2	0	0	0	17:00:00-17:59:00	2012	0	Dommages matériels seulement	Montréal(06)	Montréal (66 )	1	0	0	0	0	0	0	0	0	0	0	0	1
SPVM _ 2012 _ 10576	VE	2012/02/24	66023				AYLMER	1	STE CATHERINE		31		16	2	3		13		11	32		1				17	2	0	0	0	17:00:00-17:59:00	2012	0	Dommages matériels inférieurs au seuil de rapportage	Montréal(06)	Montréal (66 )	2	0	0	0	0	0	0	0	0	0	0	0	0
SPVM _ 2012 _ 10577	VE	2012/02/24	66023				LUCIEN L ALLIER	1	ST JACQUES	15	31		16	3	2		12		12	33		1			N	12	2	0	0	0	Non précisé	2012	0	Dommages matériels seulement	Montréal(06)	Montréal (66 )	1	0	0	0	0	0	0	0	0	0	0	0	1
SPVM _ 2012 _ 10578	DI	2012/02/26	66023					1	NAZARETH ET WILLIAM	25	38	3	16	3	3		15		11	33		1			N	12	1	0	0	0	19:00:00-19:59:00	2012	0	Dommages matériels inférieurs au seuil de rapportage	Montréal(06)	Montréal (66 )	1	0	0	0	0	0	0	0	0	0	0	0	0
SPVM _ 2012 _ 10579	SA	2012/02/25	66023				OTTAWA				31								11	34		1					2	0	0	0	Non précisé	2012	0	Dommages matériels inférieurs au seuil de rapportage	Montréal(06)	Montréal (66 )	1	0	0	0	0	0	0	0	0	0	0	0	1
SPVM _ 2012 _ 1058	MA	2012/11/20	66142				WESTPARK	1	FRANCE		50		18	3	2		14		21	32		2				11	1	0	0	0	00:00:00-00:59:00	2012	0	Dommages matériels inférieurs au seuil de rapportage	Montréal(06)	Montréal (66 )	0	0	0	0	0	0	0	0	1	0	0	0	0
SPVM _ 2012 _ 10580	LU	2012/02/27	66023				DE LA COMMUNE	1	BRENNAN		31		11	1	4		13		11	32		1			O	11	2	0	0	0	10:00:00-10:59:00	2012	0	Dommages matériels seulement	Montréal(06)	Montréal (66 )	1	1	0	0	0	0	0	0	0	0	0	0	0
SPVM _ 2012 _ 10581	LU	2012/02/27	66023				DE LA COMMUNE	1	BRENNAN		31		11	1	4		13		11	32		1			N	11	2	0	0	0	11:00:00-11:59:00	2012	0	Dommages matériels seulement	Montréal(06)	Montréal (66 )	1	1	0	0	0	0	0	0	0	0	0	0	0
SPVM _ 2012 _ 10582	LU	2012/02/27	66023	1550			METCALFE				99		18	1	3				11	34		1				11	2	0	0	0	12:00:00-12:59:00	2012	0	Dommages matériels seulement	Montréal(06)	Montréal (66 )	1	0	1	0	0	0	0	0	0	0	0	0	0
SPVM _ 2012 _ 10583	MA	2012/01/24	66023	1097			ST ALEXANDRE	1	RENE LEVESQUE		31		12	1	2		13		11	33		1				11	2	0	0	0	09:00:00-09:59:00	2012	0	Dommages matériels inférieurs au seuil de rapportage	Montréal(06)	Montréal (66 )	1	0	0	1	0	0	0	0	0	0	0	0	0
SPVM _ 2012 _ 10584	LU	2012/02/27	66023	700			MANSFIELD				31																2	0	0	0	Non précisé	2012	0	Dommages matériels inférieurs au seuil de rapportage	Montréal(06)	Montréal (66 )	1	0	0	0	0	0	0	0	0	0	0	0	1
SPVM _ 2012 _ 10585	MA	2012/02/28	66023				DE LA CATHEDRALE		N-D		31		16	1	3		19		11	34		3				11	2	0	0	0	08:00:00-08:59:00	2012	0	Dommages matériels seulement	Montréal(06)	Montréal (66 )	2	0	0	0	0	0	0	0	0	0	0	0	0
SPVM _ 2012 _ 10586	MA	2012/02/28	66023					1	WILLIAM ET MONTAGNE	10	31	3	12	1	4		19		11	33		1			E	11	2	0	0	0	09:00:00-09:59:00	2012	0	Dommages matériels seulement	Montréal(06)	Montréal (66 )	1	1	0	0	0	0	0	0	0	0	0	0	0
SPVM _ 2012 _ 10587	MA	2012/02/28	66023				SHERBROOKE	1	SIMPSON		32		12	1	2		13		11	32		3				11	1	0	0	0	10:00:00-10:59:00	2012	0	Dommages matériels inférieurs au seuil de rapportage	Montréal(06)	Montréal (66 )	1	0	0	0	0	0	0	0	0	0	0	0	0
SPVM _ 2012 _ 10588	MA	2012/02/28	66023	1529			CEDAR				31		12	1	3		19		14	99		3				11	2	0	0	0	10:00:00-10:59:00	2012	0	Dommages matériels inférieurs au seuil de rapportage	Montréal(06)	Montréal (66 )	2	0	0	0	0	0	0	0	0	0	0	0	0
SPVM _ 2012 _ 10589	SA	2012/01/28	66023				ST ANTOINE O	1	PEEL		31				3		19			34							2	0	0	0	Non précisé	2012	0	Dommages matériels inférieurs au seuil de rapportage	Montréal(06)	Montréal (66 )	1	0	0	0	0	0	0	0	0	0	0	0	1
SPVM _ 2012 _ 1059	LU	2012/11/19	66142	3347			BD DES SOURCES						11	1	3		21		11	40		9				11	2	0	0	0	12:00:00-12:59:00	2012	0	Dommages matériels inférieurs au seuil de rapportage	Montréal(06)	Montréal (66 )	1	0	0	0	0	0	0	0	0	0	0	0	1
SPVM _ 2012 _ 10590	SA	2012/02/25	66023	3470			SIMPSON						16	1	2		14		11	34		1				18	2	0	0	0	13:00:00-13:59:00	2012	0	Dommages matériels inférieurs au seuil de rapportage	Montréal(06)	Montréal (66 )	1	0	0	0	0	0	0	0	0	0	0	0	1
SPVM _ 2012 _ 10591	MA	2012/02/28	66023	687			DES PINS		UNIVERSITY	100	31		12	1	3		12		11	31		1			O	11	4	0	0	0	13:00:00-13:59:00	2012	0	Dommages matériels seulement	Montréal(06)	Montréal (66 )	4	0	0	0	0	0	0	0	0	0	0	0	0
SPVM _ 2012 _ 10592	MA	2012/02/28	66023				CEDAR	1	COTE DES NEIGES		31		12	3	2		13		13	32		3				11	2	0	0	0	22:00:00-22:59:00	2012	0	Dommages matériels seulement	Montréal(06)	Montréal (66 )	2	0	0	0	0	0	0	0	0	0	0	0	0
SPVM _ 2012 _ 10593	ME	2012/02/29	66023				STE CATHERINE	1	DRUMOND	20	31		12	1	3		13		11	33		1			O	11	2	0	0	0	06:00:00-06:59:00	2012	0	Dommages matériels inférieurs au seuil de rapportage	Montréal(06)	Montréal (66 )	0	2	0	0	0	0	0	0	0	0	0	0	0
SPVM _ 2012 _ 10594	ME	2012/02/29	66023				VICTOR HUGO	1	VERSAILLE	10	31		12	1	2		14		11	33		2			E	11	2	0	0	0	12:00:00-12:59:00	2012	0	Dommages matériels seulement	Montréal(06)	Montréal (66 )	2	0	0	0	0	0	0	0	0	0	0	0	0
SPVM _ 2012 _ 10595	JE	2012/03/01	66023	640			VIGER	2	FACE 640 VIGER				16	1	3		13		11	33		1				17	2	0	0	0	07:00:00-07:59:00	2012	0	Dommages matériels seulement	Montréal(06)	Montréal (66 )	1	1	0	0	0	0	0	0	0	0	0	0	0
SPVM _ 2012 _ 10596	LU	2012/02/13	66023				GUY	1	STE CATHERINE	100			11	1	1		21		11	40		2			N	11	2	0	0	0	08:00:00-08:59:00	2012	0	Dommages matériels inférieurs au seuil de rapportage	Montréal(06)	Montréal (66 )	1	0	0	0	0	0	0	0	0	0	0	0	1
SPVM _ 2012 _ 10597	JE	2012/03/01	66023				RENE LEVESQUE	1	UNION		31		16	1	3		13		11	32		3				17	2	0	0	0	11:00:00-11:59:00	2012	0	Dommages matériels seulement	Montréal(06)	Montréal (66 )	2	0	0	0	0	0	0	0	0	0	0	0	0
SPVM _ 2012 _ 10598	JE	2012/03/01	66023				ST ANTOINE	1	GUY		31		16	3	2		14		12	32		3				17	2	0	0	0	19:00:00-19:59:00	2012	0	Dommages matériels seulement	Montréal(06)	Montréal (66 )	2	0	0	0	0	0	0	0	0	0	0	0	0
SPVM _ 2012 _ 10599	ME	2012/02/29	66023				UNIVERSITY	1	MAISONNEUVE		31		11	1	3		14		13	33		1			S	12	2	0	0	0	14:00:00-14:59:00	2012	0	Dommages matériels inférieurs au seuil de rapportage	Montréal(06)	Montréal (66 )	1	0	0	0	0	0	0	0	1	0	0	0	0
SPVM _ 2012 _ 106	LU	2012/02/27	66023					1	BD PIERREFONDS ET RENE EMARD		31		12	1	3		13		11	33		3				11	2	0	0	0	14:00:00-14:59:00	2012	0	Dommages matériels seulement	Montréal(06)	Montréal (66 )	2	0	0	0	0	0	0	0	0	0	0	0	0
SPVM _ 2012 _ 1060	MA	2012/11/20	66142				TERR MTL				31		11														2	0	0	0	Non précisé	2012	0	Dommages matériels inférieurs au seuil de rapportage	Montréal(06)	Montréal (66 )	1	0	0	0	0	0	0	0	0	0	0	0	1
SPVM _ 2012 _ 10600	VE	2012/03/02	66023				INSPECTEUR	1	N-D O		31		17	1	3		19		11	34		2			S	17	2	0	0	0	09:00:00-09:59:00	2012	0	Dommages matériels inférieurs au seuil de rapportage	Montréal(06)	Montréal (66 )	2	0	0	0	0	0	0	0	0	0	0	0	0
SPVM _ 2012 _ 10601	JE	2012/03/01	66023				CATHEDRALE	1	GAUCHETIERE	50	31		16	3	3		13								N	17	2	0	0	0	17:00:00-17:59:00	2012	0	Dommages matériels seulement	Montréal(06)	Montréal (66 )	2	0	0	0	0	0	0	0	0	0	0	0	0
SPVM _ 2012 _ 10602	VE	2012/03/02	66023					1	METCALFE ET MAISONNEUVE		31	9	12	3	3		14		11	32		1				12	2	0	0	0	21:00:00-21:59:00	2012	0	Dommages matériels seulement	Montréal(06)	Montréal (66 )	1	0	0	0	0	0	0	1	0	0	0	0	0
SPVM _ 2012 _ 10603	VE	2012/03/02	66023	1470			CRESCENT	1	RUELLE ADJACENTE		31		16	2	3		16		11	99						12	2	0	0	0	23:00:00-23:59:00	2012	0	Dommages matériels inférieurs au seuil de rapportage	Montréal(06)	Montréal (66 )	1	0	0	0	0	0	0	0	1	0	0	0	0
SPVM _ 2012 _ 10604	SA	2012/03/03	66023				STE CATHERINE		STANLEY	5	31		15	3	3		13		11	32		1				17	2	0	0	0	02:00:00-02:59:00	2012	0	Dommages matériels inférieurs au seuil de rapportage	Montréal(06)	Montréal (66 )	1	0	0	0	0	0	0	1	0	0	0	0	0
SPVM _ 2012 _ 10605	ME	2012/02/29	66023	1030			DE LA MONTAGNE	2	GARAGE ESSO		31		12	1	3		21		11	40		4				12	2	0	0	0	17:00:00-17:59:00	2012	0	Dommages matériels inférieurs au seuil de rapportage	Montréal(06)	Montréal (66 )	2	0	0	0	0	0	0	0	0	0	0	0	0
SPVM _ 2012 _ 10606	VE	2012/03/02	66023	1155			METCALFE				31						14		11	34		1					2	0	0	0	19:00:00-19:59:00	2012	0	Dommages matériels seulement	Montréal(06)	Montréal (66 )	1	0	0	0	0	0	0	0	0	0	0	0	1
SPVM _ 2012 _ 10607	VE	2012/03/02	66023	630			WILLIAM	1	MC GILL COLLEGE		31		16	3	3		19		11	34		1			E	12	2	0	0	0	Non précisé	2012	0	Dommages matériels seulement	Montréal(06)	Montréal (66 )	1	0	0	0	0	0	0	0	0	0	0	0	1
SPVM _ 2012 _ 10608	SA	2012/03/03	66023				PEEL	1	STE CATHERINE	20			12	3	3		13		11	33		3			N	12	2	0	0	0	03:00:00-03:59:00	2012	0	Dommages matériels seulement	Montréal(06)	Montréal (66 )	2	0	0	0	0	0	0	0	0	0	0	0	0
SPVM _ 2012 _ 10609	DI	2012/03/04	66023				S	1	SHERBROOKE O ET CHOMEDEY		31		12	3	3		13	1	11	32	6	3			N	12	2	0	1	0	03:00:00-03:59:00	2012	1	Grave	Montréal(06)	Montréal (66 )	1	1	0	0	0	0	0	0	0	0	0	0	0
SPVM _ 2012 _ 1061	VE	2012/11/23	66142	355			ROGER PILON				43		11	1	2		14	1	11	34	6	2				11	1	0	0	1	09:00:00-09:59:00	2012	1	Léger	Montréal(06)	Montréal (66 )	1	0	0	0	0	0	0	0	0	0	0	0	0
SPVM _ 2012 _ 10610	DI	2012/03/04	66023				PEEL	1	ST ANTOINE		31		12	3	3		13	1	11	32		3				12	2	0	0	1	04:00:00-04:59:00	2012	1	Léger	Montréal(06)	Montréal (66 )	2	0	0	0	0	0	0	0	0	0	0	0	0
SPVM _ 2012 _ 10611	DI	2012/03/04	66023				AV CANADIEN DE MONTREAL	1	DE LA MONTAGNE		41		11	1	3		13		12	32		2				11	1	0	0	0	12:00:00-12:59:00	2012	0	Dommages matériels inférieurs au seuil de rapportage	Montréal(06)	Montréal (66 )	0	0	0	1	0	0	0	0	0	0	0	0	0
SPVM _ 2012 _ 10612	DI	2012/03/04	66023	1334			STE CATHERINE O	1	MONTAGNE	100	31		11	2	3		14		11	33		1			O	11	2	0	0	0	17:00:00-17:59:00	2012	0	Dommages matériels inférieurs au seuil de rapportage	Montréal(06)	Montréal (66 )	2	0	0	0	0	0	0	0	0	0	0	0	0
SPVM _ 2012 _ 10613	DI	2012/03/04	66023	1400			RENE LEVESQUE	1	LUCIEN L ALLIER	10	31		18	3	3		13		11	99		9			O	11	2	0	0	0	23:00:00-23:59:00	2012	0	Dommages matériels inférieurs au seuil de rapportage	Montréal(06)	Montréal (66 )	2	0	0	0	0	0	0	0	0	0	0	0	0
SPVM _ 2012 _ 10614	LU	2012/03/05	66023				SHERBROOKE	1	MCGILL		99		11	1	3		13	5	11	32	6	3				11	1	0	0	1	14:00:00-14:59:00	2012	1	Léger	Montréal(06)	Montréal (66 )	0	0	0	1	0	0	0	0	0	0	0	0	0
SPVM _ 2012 _ 10615	VE	2012/03/02	66023				DE LA MONTAGNE	1	MAISONNEUVE	50	31		16	1	3		13		13	33		2			N	12	2	0	0	0	Non précisé	2012	0	Dommages matériels inférieurs au seuil de rapportage	Montréal(06)	Montréal (66 )	1	0	0	0	0	0	0	0	0	0	0	0	1
SPVM _ 2012 _ 10616	LU	2012/03/05	66023				GAUCHETIERE				32		18	3	3		13	1	13	32	6	3				11	1	0	0	1	19:00:00-19:59:00	2012	1	Léger	Montréal(06)	Montréal (66 )	1	0	0	0	0	0	0	0	0	0	0	0	0
SPVM _ 2012 _ 10617	SA	2012/03/03	66023	1440			DE LA MONTAGNE		STAT		31		12	1	3		21		11	99		9				12	2	0	0	0	13:00:00-13:59:00	2012	0	Dommages matériels inférieurs au seuil de rapportage	Montréal(06)	Montréal (66 )	1	0	0	0	0	0	0	0	0	0	0	0	1
SPVM _ 2012 _ 10618	LU	2012/03/05	66023				WELLINGTON	1	DUKE				11	1	2		13		11	34						11	2	0	0	0	10:00:00-10:59:00	2012	0	Dommages matériels inférieurs au seuil de rapportage	Montréal(06)	Montréal (66 )	1	0	0	0	0	0	0	0	0	0	0	0	1
SPVM _ 2012 _ 10619	MA	2012/03/06	66023	400			SHERBROOKE O				31		11	3	3		21		11	99		9				99	2	0	0	0	Non précisé	2012	0	Dommages matériels inférieurs au seuil de rapportage	Montréal(06)	Montréal (66 )	1	0	0	0	0	0	0	0	0	0	0	0	1
SPVM _ 2012 _ 1062	DI	2012/11/25	66142	3347			SOURCES				59	1	11	1	3		21		11	40		9			S	11	1	0	0	0	08:00:00-08:59:00	2012	0	Dommages matériels seulement	Montréal(06)	Montréal (66 )	1	0	0	0	0	0	0	0	0	0	0	0	0
SPVM _ 2012 _ 10620	MA	2012/03/06	66023	612			ST JACQUES	1	MCGILL	10	31		11	3	3		13		11	33		4			E	11	2	0	0	0	22:00:00-22:59:00	2012	0	Dommages matériels inférieurs au seuil de rapportage	Montréal(06)	Montréal (66 )	1	0	0	0	0	0	0	1	0	0	0	0	0
SPVM _ 2012 _ 10621	MA	2012/03/06	66023	687			DES PINS O				31			1	3											11	2	0	0	0	Non précisé	2012	0	Dommages matériels inférieurs au seuil de rapportage	Montréal(06)	Montréal (66 )	1	0	0	0	0	0	0	0	0	0	0	0	1
SPVM _ 2012 _ 10622	ME	2012/03/07	66023				MANSFIELD	1	N-D				11	1	3		13		11	34		1				11	2	0	0	0	08:00:00-08:59:00	2012	0	Dommages matériels inférieurs au seuil de rapportage	Montréal(06)	Montréal (66 )	1	0	0	0	0	0	0	0	0	0	0	0	1
SPVM _ 2012 _ 10623	ME	2012/03/07	66023	1180			BISHOP	1	RENE LEVESQUE BD O	50	40		11	1	3		14		11	34		1			N	11	1	0	0	0	09:00:00-09:59:00	2012	0	Dommages matériels seulement	Montréal(06)	Montréal (66 )	0	1	0	0	0	0	0	0	0	0	0	0	0
SPVM _ 2012 _ 10624	ME	2012/03/07	66023					2	1321 N-D O		31		11	1	3		13		11	34		3				11	2	0	0	0	10:00:00-10:59:00	2012	0	Dommages matériels seulement	Montréal(06)	Montréal (66 )	1	0	0	0	0	0	0	0	0	0	0	1	0
SPVM _ 2012 _ 10625	ME	2012/02/15	66023				STE CATHERINE	1	PEEL	30	31		18	3	3		13		11	33		1				19	2	0	0	0	19:00:00-19:59:00	2012	0	Dommages matériels inférieurs au seuil de rapportage	Montréal(06)	Montréal (66 )	1	0	0	0	0	0	0	0	0	0	0	0	1
SPVM _ 2012 _ 10626	ME	2012/03/07	66023	687			AV DES PINS				31		11	1	9		21	1	12	99	10	9				11	2	0	0	1	10:00:00-10:59:00	2012	1	Léger	Montréal(06)	Montréal (66 )	2	0	0	0	0	0	0	0	0	0	0	0	0
SPVM _ 2012 _ 10627	DI	2012/03/04	66023				PEEL	1	STE CATHERINE	10	31		11	3	3		13		11	33		2			N	11	2	0	0	0	Non précisé	2012	0	Dommages matériels seulement	Montréal(06)	Montréal (66 )	1	0	0	0	0	0	0	0	0	0	0	0	1
SPVM _ 2012 _ 10628	ME	2012/03/07	66023					1	CANADIENS DE MTL ET DE LA MONTAGNE	15	31		12	1	3		21		11						E	11	2	0	0	0	14:00:00-14:59:00	2012	0	Dommages matériels inférieurs au seuil de rapportage	Montréal(06)	Montréal (66 )	2	0	0	0	0	0	0	0	0	0	0	0	0
SPVM _ 2012 _ 10629	JE	2012/03/08	66023	1196			CAMILLIEN HOUDE				31		11	4	7		13		13	99		2				11	2	0	0	0	02:00:00-02:59:00	2012	0	Dommages matériels inférieurs au seuil de rapportage	Montréal(06)	Montréal (66 )	2	0	0	0	0	0	0	0	0	0	0	0	0
SPVM _ 2012 _ 1063	LU	2012/11/26	66142				BD ST JEAN	1	BLUE HAVEN	1	31		11	3	3		13	1	11	32	6	3			N	11	2	0	0	0	03:00:00-03:59:00	2012	0	Dommages matériels seulement	Montréal(06)	Montréal (66 )	2	0	0	0	0	0	0	0	0	0	0	0	0
SPVM _ 2012 _ 10630	JE	2012/03/08	66023					1	SUMMERHILL ET COTES DES NEIGES	20	99	3	16	3	2		14		11	33		2			O		2	0	0	0	12:00:00-12:59:00	2012	0	Dommages matériels seulement	Montréal(06)	Montréal (66 )	1	0	1	0	0	0	0	0	0	0	0	0	0
SPVM _ 2012 _ 10631	JE	2012/03/08	66023				STE CATHERINE O	1	CITY CONCILLORS		32		11	1	3		13	1	11	32	6	1				11	1	0	0	1	12:00:00-12:59:00	2012	1	Léger	Montréal(06)	Montréal (66 )	1	0	0	0	0	0	0	0	0	0	0	0	0
SPVM _ 2012 _ 10632	JE	2012/03/08	66023				RENE LEVESQUE	1	GUY	5	31		12	2	3		13		11	32		5			O	14	2	0	0	0	18:00:00-18:59:00	2012	0	Dommages matériels inférieurs au seuil de rapportage	Montréal(06)	Montréal (66 )	2	0	0	0	0	0	0	0	0	0	0	0	0
SPVM _ 2012 _ 10633	VE	2012/03/09	66023				STE CATHERINE	1	BISHOP		31		12	3	3		13		11	32		1				12	2	0	0	0	00:00:00-00:59:00	2012	0	Dommages matériels seulement	Montréal(06)	Montréal (66 )	1	0	0	0	0	0	0	1	0	0	0	0	0
SPVM _ 2012 _ 10634	VE	2012/03/09	66023				MAISONNEUVE ET PEEL				31	9	12	3	3		13		11	32		1				14	2	0	0	0	01:00:00-01:59:00	2012	0	Dommages matériels seulement	Montréal(06)	Montréal (66 )	1	0	0	0	0	0	0	1	0	0	0	0	0
SPVM _ 2012 _ 10635	VE	2012/03/09	66023					1	GUY ET ARGYLE		59		11	1	3		13		13	37		2				11	1	0	0	0	08:00:00-08:59:00	2012	0	Dommages matériels inférieurs au seuil de rapportage	Montréal(06)	Montréal (66 )	0	1	0	0	0	0	0	0	0	0	0	0	0
SPVM _ 2012 _ 10636	JE	2012/03/08	66023				DRUMMOND	1	RENE LEVESQUE		31			1	3		21										2	0	0	0	Non précisé	2012	0	Dommages matériels inférieurs au seuil de rapportage	Montréal(06)	Montréal (66 )	1	0	0	0	0	0	0	0	0	0	0	0	1
SPVM _ 2012 _ 10637	SA	2012/03/10	66023				CAMILIEN HOUDE	1	MT ROYAL	650	40		18	3	7		13		23	34		5			E	11	1	0	0	0	03:00:00-03:59:00	2012	0	Dommages matériels seulement	Montréal(06)	Montréal (66 )	1	0	0	0	0	0	0	0	0	0	0	0	0
SPVM _ 2012 _ 10638	JE	2012/03/08	66023				STE CATHERINE O	1	GUY	50			11	1	3		13		11	33		1			E	11	2	0	0	0	13:00:00-13:59:00	2012	0	Dommages matériels inférieurs au seuil de rapportage	Montréal(06)	Montréal (66 )	1	0	0	0	0	0	0	0	0	0	0	0	1
SPVM _ 2012 _ 10639	SA	2012/03/10	66023	1470			PEEL						11	3	3		13		11	34		2				11	2	0	0	0	19:00:00-19:59:00	2012	0	Dommages matériels inférieurs au seuil de rapportage	Montréal(06)	Montréal (66 )	2	0	0	0	0	0	0	0	0	0	0	0	0
SPVM _ 2012 _ 1064	VE	2012/11/23	66142	119			LAURENT				31		11	2	2		14									11	2	0	0	0	Non précisé	2012	0	Dommages matériels inférieurs au seuil de rapportage	Montréal(06)	Montréal (66 )	1	0	0	0	0	0	0	0	0	0	0	0	1
SPVM _ 2012 _ 10640	SA	2012/03/10	66023	3450			F DRUMMOND	1	MOUTAIN PL	50	31				3		14		13	34		2			N		2	0	0	0	22:00:00-22:59:00	2012	0	Dommages matériels seulement	Montréal(06)	Montréal (66 )	1	0	0	0	0	0	0	0	0	0	0	0	1
SPVM _ 2012 _ 10641	DI	2012/03/11	66023	1196			CAMILLIEN HOUDE				31		12	3	7		19		12			1				11	2	0	0	0	19:00:00-19:59:00	2012	0	Dommages matériels inférieurs au seuil de rapportage	Montréal(06)	Montréal (66 )	2	0	0	0	0	0	0	0	0	0	0	0	0
SPVM _ 2012 _ 10642	LU	2012/03/12	66023	1200			MACKAY	2	STAT EXT		31		11	1	3		21		11	99		9				11	4	0	0	0	13:00:00-13:59:00	2012	0	Dommages matériels seulement	Montréal(06)	Montréal (66 )	4	0	0	0	0	0	0	0	0	0	0	0	0
SPVM _ 2012 _ 10643	LU	2012/03/12	66023				UNIVERSITY	1	GAUCHETIERE DE LA		31		11	1	3		13		13	32		3			N	11	2	0	0	0	14:00:00-14:59:00	2012	0	Dommages matériels seulement	Montréal(06)	Montréal (66 )	2	0	0	0	0	0	0	0	0	0	0	0	0
SPVM _ 2012 _ 10644	LU	2012/03/12	66023				NAZARETH	1	WELLINGTON				11	1	3		13		11	32		1	2		N	11	2	0	0	0	17:00:00-17:59:00	2012	0	Dommages matériels seulement	Montréal(06)	Montréal (66 )	0	0	0	0	0	0	0	0	0	0	0	0	2
SPVM _ 2012 _ 10645	MA	2012/03/13	66023				RENE LEVESQUE	1	GUY		31		12	1	3		13		11	32		3			N	14	2	0	0	0	07:00:00-07:59:00	2012	0	Dommages matériels seulement	Montréal(06)	Montréal (66 )	2	0	0	0	0	0	0	0	0	0	0	0	0
SPVM _ 2012 _ 10646	MA	2012/03/13	66023	1110			SHERBROOKE				31		11	1	3		13		11	34		3				12	2	0	0	0	14:00:00-14:59:00	2012	0	Dommages matériels inférieurs au seuil de rapportage	Montréal(06)	Montréal (66 )	2	0	0	0	0	0	0	0	0	0	0	0	0
SPVM _ 2012 _ 10647	MA	2012/03/13	66023				CRESCENT	1	MAISONNEUVE	20	31		12	1	3		13		11	33		1			S	14	2	0	0	0	16:00:00-16:59:00	2012	0	Dommages matériels seulement	Montréal(06)	Montréal (66 )	1	0	0	0	0	0	0	0	0	0	0	0	1
SPVM _ 2012 _ 10648	MA	2012/03/13	66023	1190			BISHOP				31		12	3	3		12		11	99		1				12	2	0	0	1	23:00:00-23:59:00	2012	1	Léger	Montréal(06)	Montréal (66 )	2	0	0	0	0	0	0	0	0	0	0	0	0
SPVM _ 2012 _ 10649	ME	2012/03/14	66023				DE LA COMMUNE		DUKE	25	32		12	3	3		14	1	11	33	6	1			O	14	2	0	0	0	21:00:00-21:59:00	2012	0	Dommages matériels seulement	Montréal(06)	Montréal (66 )	1	0	0	0	0	0	0	0	0	0	0	0	1
SPVM _ 2012 _ 1065	MA	2012/11/27	66142	141			TOBAGO				31		11	1	2		14		11	33		2				11	2	0	0	0	10:00:00-10:59:00	2012	0	Dommages matériels inférieurs au seuil de rapportage	Montréal(06)	Montréal (66 )	1	1	0	0	0	0	0	0	0	0	0	0	0
SPVM _ 2012 _ 10650	ME	2012/03/14	66023				TORRANCE	1	ST FELIX	20	31		11	3	3		21		14	33						11	2	0	0	0	22:00:00-22:59:00	2012	0	Dommages matériels seulement	Montréal(06)	Montréal (66 )	2	0	0	0	0	0	0	0	0	0	0	0	0
SPVM _ 2012 _ 10651	JE	2012/03/15	66023					1	DRUMMOND ET STE CATHERINE O		31		12	3	3		13		11	34		1			S	12	2	0	0	0	00:00:00-00:59:00	2012	0	Dommages matériels seulement	Montréal(06)	Montréal (66 )	2	0	0	0	0	0	0	0	0	0	0	0	0
SPVM _ 2012 _ 10652	JE	2012/03/15	66023	1650			CEDAR				31		11	1	3		21			99						12	2	0	0	0	Non précisé	2012	0	Dommages matériels inférieurs au seuil de rapportage	Montréal(06)	Montréal (66 )	1	0	0	0	0	0	0	0	0	0	0	0	1
SPVM _ 2012 _ 10653	JE	2012/03/15	66023				PEEL	1	WELLINGTON	20	31		11	1	3		14		11	33		3			N	11	2	0	0	0	Non précisé	2012	0	Dommages matériels inférieurs au seuil de rapportage	Montréal(06)	Montréal (66 )	1	0	0	0	0	0	0	0	0	0	0	0	1
SPVM _ 2012 _ 10654	ME	2012/03/14	66023	1373			ST JACQUES				31		11	1	3		14		11	34		2				12	2	0	0	0	13:00:00-13:59:00	2012	0	Dommages matériels inférieurs au seuil de rapportage	Montréal(06)	Montréal (66 )	2	0	0	0	0	0	0	0	0	0	0	0	0
SPVM _ 2012 _ 10655	JE	2012/03/15	66023	3730			COTE DES NEIGES	1	DES PINS	10	49		11	3	2		13		13	33		1			O	11	1	0	0	0	18:00:00-18:59:00	2012	0	Dommages matériels seulement	Montréal(06)	Montréal (66 )	1	0	0	0	0	0	0	0	0	0	0	0	0
SPVM _ 2012 _ 10656	VE	2012/03/16	66023				SHERBROOKE O	1	CITY COUNCILLORS				12	3	3		13		11	32		3				14	2	0	0	0	21:00:00-21:59:00	2012	0	Dommages matériels inférieurs au seuil de rapportage	Montréal(06)	Montréal (66 )	0	0	0	1	0	0	0	1	0	0	0	0	0
SPVM _ 2012 _ 10657	VE	2012/03/16	66023	895			DE LA GAUCHETIERE O				31		11	2	3		21		11	40						11	2	0	0	0	20:00:00-20:59:00	2012	0	Dommages matériels inférieurs au seuil de rapportage	Montréal(06)	Montréal (66 )	1	0	0	0	0	0	0	0	0	0	0	0	1
SPVM _ 2012 _ 10658	SA	2012/03/17	66032					1	COTE DES NEIGES ET REMEMBRANCE	5	99		12	1	2		14		13	33		1				13	1	0	0	0	08:00:00-08:59:00	2012	0	Dommages matériels seulement	Montréal(06)	Montréal (66 )	0	0	0	0	0	0	1	0	0	0	0	0	0
SPVM _ 2012 _ 10659	SA	2012/03/17	66023				MAISONNEUVE	1	DRUMMOND		40		11	1	3		13		11	33		1				11	2	0	0	0	06:00:00-06:59:00	2012	0	Dommages matériels seulement	Montréal(06)	Montréal (66 )	1	0	0	0	0	0	0	0	0	0	0	0	1
SPVM _ 2012 _ 1066	MA	2012/11/27	66142				BRUNSWICK	1	TECUMSEH	2	31		11	1	3		13	1	11	32	10	3			O	11	2	0	0	0	13:00:00-13:59:00	2012	0	Dommages matériels seulement	Montréal(06)	Montréal (66 )	2	0	0	0	0	0	0	0	0	0	0	0	0
SPVM _ 2012 _ 10660	VE	2012/03/16	66023				CITY CONCILLORS		MAYOR	6	31		12	1	3		14		11	33		1				11	2	0	0	0	Non précisé	2012	0	Dommages matériels inférieurs au seuil de rapportage	Montréal(06)	Montréal (66 )	0	0	0	0	0	2	0	0	0	0	0	0	0
SPVM _ 2012 _ 10661	SA	2012/03/17	66023				CYPRESS	1	PEEL		31		11	1	3		13		11	33		2				11	2	0	0	0	12:00:00-12:59:00	2012	0	Dommages matériels seulement	Montréal(06)	Montréal (66 )	2	0	0	0	0	0	0	0	0	0	0	0	0
SPVM _ 2012 _ 10662	SA	2012/03/17	66023	1234			DE LA MONTAGNE				31		12	1	3		13			33						12	2	0	0	0	Non précisé	2012	0	Dommages matériels inférieurs au seuil de rapportage	Montréal(06)	Montréal (66 )	1	0	0	0	0	0	0	0	0	0	0	0	1
SPVM _ 2012 _ 10663	SA	2012/03/17	66023					1	CRESCENT ET STE CATHERINE O	20	31		11	3	3		13		11	33		1			S	11	2	0	0	0	21:00:00-21:59:00	2012	0	Dommages matériels inférieurs au seuil de rapportage	Montréal(06)	Montréal (66 )	2	0	0	0	0	0	0	0	0	0	0	0	0
SPVM _ 2012 _ 10664	SA	2012/03/17	66023				MANSFIELD	1	ST ANTOINE		31		11	3	3		13		13	32		1				11	2	0	0	0	22:00:00-22:59:00	2012	0	Dommages matériels inférieurs au seuil de rapportage	Montréal(06)	Montréal (66 )	2	0	0	0	0	0	0	0	0	0	0	0	0
SPVM _ 2012 _ 10665	DI	2012/03/18	66023				RENE LEVESQUE O	1	UNIVERSITY		31		11	3	3		13	1	11	32	6	5				11	2	0	1	2	01:00:00-01:59:00	2012	3	Grave	Montréal(06)	Montréal (66 )	1	0	0	0	0	0	0	1	0	0	0	0	0
SPVM _ 2012 _ 10666	DI	2012/03/18	66023				MT CRESCENT	1	STE CATHERINE	20	31		11	3	3		14		11	33		1			N	11	2	0	0	0	02:00:00-02:59:00	2012	0	Dommages matériels inférieurs au seuil de rapportage	Montréal(06)	Montréal (66 )	1	0	0	0	0	0	0	0	1	0	0	0	0
SPVM _ 2012 _ 10667	DI	2012/03/18	66023					1	CRESCENT ET STE CATHERINE	2	31		11	1	3		13		11	32		1			S	11	2	0	0	0	09:00:00-09:59:00	2012	0	Dommages matériels inférieurs au seuil de rapportage	Montréal(06)	Montréal (66 )	1	1	0	0	0	0	0	0	0	0	0	0	0
SPVM _ 2012 _ 10668	DI	2012/03/18	66023	980			GUY	1	RENE LEVESQUE	50	49		11	2	3		21		11	99		9			O	11	1	0	0	0	18:00:00-18:59:00	2012	0	Dommages matériels seulement	Montréal(06)	Montréal (66 )	0	0	0	0	0	0	0	0	1	0	0	0	0
SPVM _ 2012 _ 10669	DI	2012/03/18	66023				DUKE	1	WILLIAM		49		11	3	2		14		11	32		1				11	1	0	0	0	23:00:00-23:59:00	2012	0	Dommages matériels seulement	Montréal(06)	Montréal (66 )	0	1	0	0	0	0	0	0	0	0	0	0	0
SPVM _ 2012 _ 1067	MA	2012/11/27	66142	3343			SOURCES	1	BRUNSWICK	100	31		11	1	3		21		11	40		2			N	11	2	0	0	0	Non précisé	2012	0	Dommages matériels inférieurs au seuil de rapportage	Montréal(06)	Montréal (66 )	1	0	0	0	0	0	0	0	0	0	0	0	1
SPVM _ 2012 _ 10670	DI	2012/03/18	66023	1			PL VILLE MARIE										21										2	0	0	0	Non précisé	2012	0	Dommages matériels inférieurs au seuil de rapportage	Montréal(06)	Montréal (66 )	2	0	0	0	0	0	0	0	0	0	0	0	0
SPVM _ 2012 _ 10671	LU	2012/03/19	66023				MONTAGNE DE LA	1	TORRENCE	10																	2	0	0	0	Non précisé	2012	0	Dommages matériels inférieurs au seuil de rapportage	Montréal(06)	Montréal (66 )	1	0	0	0	0	0	0	0	0	0	0	0	1
SPVM _ 2012 _ 10672	DI	2012/03/18	66023				UNION	1	PRESIDENT KENNEDY	2	31		11	1	3		13		13	32		1				11	2	0	0	0	12:00:00-12:59:00	2012	0	Dommages matériels inférieurs au seuil de rapportage	Montréal(06)	Montréal (66 )	1	0	0	0	0	0	0	0	0	0	0	0	1
SPVM _ 2012 _ 10673	ME	2012/03/14	66023								31																2	0	0	0	00:00:00-00:59:00	2012	0	Dommages matériels inférieurs au seuil de rapportage	Montréal(06)	Montréal (66 )	1	0	0	0	0	0	0	0	0	0	0	0	1
SPVM _ 2012 _ 10674	ME	2012/03/21	66023				WELLINGTON	1	PEEL	10	31		11	1	3		13		11	33		2			O	11	2	0	0	0	12:00:00-12:59:00	2012	0	Dommages matériels seulement	Montréal(06)	Montréal (66 )	1	1	0	0	0	0	0	0	0	0	0	0	0
SPVM _ 2012 _ 10675	ME	2012/03/21	66023				STANLEY	1	MAISONNEUVE	30	31		11	1	3		13		11	33		1			N	11	2	0	0	0	14:00:00-14:59:00	2012	0	Dommages matériels inférieurs au seuil de rapportage	Montréal(06)	Montréal (66 )	0	0	0	0	0	1	0	0	0	0	0	0	1
SPVM _ 2012 _ 10676	JE	2012/03/08	66023				N-D	1	INSPECTEUR		31		11	1	3		13		11	32		3				11	2	0	0	0	Non précisé	2012	0	Dommages matériels inférieurs au seuil de rapportage	Montréal(06)	Montréal (66 )	1	0	0	0	0	0	0	0	0	0	0	0	1
SPVM _ 2012 _ 10677	ME	2012/03/21	66023				BISHOP		SHERBROOKE		31		11	1	2		14			33		1			S	11	2	0	0	0	17:00:00-17:59:00	2012	0	Dommages matériels inférieurs au seuil de rapportage	Montréal(06)	Montréal (66 )	2	0	0	0	0	0	0	0	0	0	0	0	0
SPVM _ 2012 _ 10678	JE	2012/03/22	66023				SHERBROOKE	1	DRUMMOND	5	31		11	1	2	138	12		11	32		3			O	11	2	0	0	0	13:00:00-13:59:00	2012	0	Dommages matériels seulement	Montréal(06)	Montréal (66 )	1	0	1	0	0	0	0	0	0	0	0	0	0
SPVM _ 2012 _ 10679	JE	2012/03/22	66023	1047				1	MONTAGNE		31		11	1	3		21		11	99						11	2	0	0	0	11:00:00-11:59:00	2012	0	Dommages matériels inférieurs au seuil de rapportage	Montréal(06)	Montréal (66 )	1	0	0	0	0	0	0	0	0	0	0	0	1
SPVM _ 2012 _ 1068	MA	2012/11/27	66142	81			BRUNSWICK OPP	1	MONTROSE	50	31		11	2	3		13	1	11	34	6	5			O	11	2	0	1	1	18:00:00-18:59:00	2012	2	Grave	Montréal(06)	Montréal (66 )	1	1	0	0	0	0	0	0	0	0	0	0	0
SPVM _ 2012 _ 10680	JE	2012/03/22	66023				SHERBROOKE	1	DUROCHER	10	31		11	1	3	138	12		11	34		3			E	11	2	0	0	0	16:00:00-16:59:00	2012	0	Dommages matériels inférieurs au seuil de rapportage	Montréal(06)	Montréal (66 )	1	0	0	0	0	0	0	1	0	0	0	0	0
SPVM _ 2012 _ 10681	JE	2012/03/22	66023	895			GAUCHETIERE O	1	DE L E	2	31		11	1	3		13		11	32		3			O	11	2	0	0	0	17:00:00-17:59:00	2012	0	Dommages matériels seulement	Montréal(06)	Montréal (66 )	1	0	0	0	0	0	0	1	0	0	0	0	0
SPVM _ 2012 _ 10682	VE	2012/03/23	66023				RENE LEVESQUE O	1	GUY		31		11	3	3		13	1	11	32	2	4				12	2	0	0	0	03:00:00-03:59:00	2012	0	Dommages matériels inférieurs au seuil de rapportage	Montréal(06)	Montréal (66 )	2	0	0	0	0	0	0	0	0	0	0	0	0
SPVM _ 2012 _ 10683	VE	2012/03/23	66023				RENE LEVESQUE O	1	FRERE ANDRE		31		11	1	3		13		11	32		1				11	2	0	0	0	08:00:00-08:59:00	2012	0	Dommages matériels inférieurs au seuil de rapportage	Montréal(06)	Montréal (66 )	1	1	0	0	0	0	0	0	0	0	0	0	0
SPVM _ 2012 _ 10684	VE	2012/03/23	66023					1	SHERBROOKE ET UNIVERSITE		31		11	1	3		13		11	32		3				11	2	0	0	0	10:00:00-10:59:00	2012	0	Dommages matériels inférieurs au seuil de rapportage	Montréal(06)	Montréal (66 )	1	1	0	0	0	0	0	0	0	0	0	0	0
SPVM _ 2012 _ 10685	SA	2012/03/17	66023					2	M STE CATHERINE	5	31		11	3	3		13		11	32		2			E	11	2	0	0	0	00:00:00-00:59:00	2012	0	Dommages matériels seulement	Montréal(06)	Montréal (66 )	1	0	0	0	0	0	0	0	0	0	0	0	1
SPVM _ 2012 _ 10686	VE	2012/02/24	66023					1	RENE LEVESQUE ET MANSFIELD		32																1	0	0	1	17:00:00-17:59:00	2012	1	Léger	Montréal(06)	Montréal (66 )	0	0	0	0	0	0	0	0	0	0	0	0	1
SPVM _ 2012 _ 10687	SA	2012/03/24	66023				MAISONNEUVE	1	AYLMER		31		11	3	3		13	1	11	32	6	1				11	2	0	0	0	00:00:00-00:59:00	2012	0	Dommages matériels seulement	Montréal(06)	Montréal (66 )	2	0	0	0	0	0	0	0	0	0	0	0	0
SPVM _ 2012 _ 10688	SA	2012/03/24	66023				STE CATHERINE O	1	DE LA MONTAGNE		32		11	3	3		14	1	11	32	6	1				12	1	0	0	1	21:00:00-21:59:00	2012	1	Léger	Montréal(06)	Montréal (66 )	1	0	0	0	0	0	0	0	0	0	0	0	0
SPVM _ 2012 _ 10689	SA	2012/03/24	66023					1	MACKAY MAISONNEUVE	5	31		11	3	3		13		11	99		1			S	11	2	0	0	0	20:00:00-20:59:00	2012	0	Dommages matériels seulement	Montréal(06)	Montréal (66 )	1	0	0	0	0	0	0	0	0	0	0	1	0
SPVM _ 2012 _ 1069	ME	2012/11/28	66023				SALABERRY	2	NORGROVE	10	31		12	1	3		13		11	33		5			O	17	2	0	0	0	15:00:00-15:59:00	2012	0	Dommages matériels seulement	Montréal(06)	Montréal (66 )	2	0	0	0	0	0	0	0	0	0	0	0	0
SPVM _ 2012 _ 10690	SA	2012/03/24	66023	1444			CRESCENT				49		11	3	3		21									99	1	0	0	0	Non précisé	2012	0	Dommages matériels inférieurs au seuil de rapportage	Montréal(06)	Montréal (66 )	1	0	0	0	0	0	0	0	0	0	0	0	0
SPVM _ 2012 _ 10691	DI	2012/03/25	66023				PEEL	1	N-D		31		11	3	3		13	1	11	32	6	3			S	12	2	0	0	1	19:00:00-19:59:00	2012	1	Léger	Montréal(06)	Montréal (66 )	2	0	0	0	0	0	0	0	0	0	0	0	0
SPVM _ 2012 _ 10692	LU	2012/03/26	66023				GUY	1	ST JACQUES				11	1	2		14		11	32		2				11	2	0	0	0	11:00:00-11:59:00	2012	0	Dommages matériels inférieurs au seuil de rapportage	Montréal(06)	Montréal (66 )	1	0	0	0	0	0	0	0	0	0	0	0	1
SPVM _ 2012 _ 10693	MA	2012/03/27	66023				OVERDALE	1	LUCIEN L ALLIER	3	31		11	1	2		14		11	32		1			O	11	2	0	0	0	06:00:00-06:59:00	2012	0	Dommages matériels seulement	Montréal(06)	Montréal (66 )	1	1	0	0	0	0	0	0	0	0	0	0	0
SPVM _ 2012 _ 10694	MA	2012/03/27	66023	3550			COTE DES NEIGES	1	SEAFORTH		31		12	1	3		13	1	13	33		3				11	2	0	0	0	10:00:00-10:59:00	2012	0	Dommages matériels seulement	Montréal(06)	Montréal (66 )	2	0	0	0	0	0	0	0	0	0	0	0	0
SPVM _ 2012 _ 10695	MA	2012/03/27	66023				DES PINS	2	COTE DES NEIGES		31			1	2		13			33		1			O		2	0	0	0	13:00:00-13:59:00	2012	0	Dommages matériels inférieurs au seuil de rapportage	Montréal(06)	Montréal (66 )	2	0	0	0	0	0	0	0	0	0	0	0	0
SPVM _ 2012 _ 10696	SA	2012/03/24	66023				DE MAISONNEUVE	1	UNION		31		11	1	3		13		11	33		1				12	2	0	0	0	Non précisé	2012	0	Dommages matériels inférieurs au seuil de rapportage	Montréal(06)	Montréal (66 )	1	0	0	0	0	0	0	0	0	0	0	0	1
SPVM _ 2012 _ 10697	MA	2012/03/27	66023				STE CATHERINE	2	DE LA MONTAGNE	30	31	9	11	1	3		13		11	33		1			O	11	2	0	0	0	14:00:00-14:59:00	2012	0	Dommages matériels seulement	Montréal(06)	Montréal (66 )	1	1	0	0	0	0	0	0	0	0	0	0	0
SPVM _ 2012 _ 10698	MA	2012/03/27	66023	3450			DRUMMOND						11	1	1		13		13						S	11	2	0	0	0	09:00:00-09:59:00	2012	0	Dommages matériels inférieurs au seuil de rapportage	Montréal(06)	Montréal (66 )	0	0	0	0	0	0	0	0	0	0	0	0	2
SPVM _ 2012 _ 10699	JE	2012/03/22	66023				DOCTEUR PEINFIELD	1	DU MUSEE		31		11	1	2		13		11	33		1				11	2	0	0	0	Non précisé	2012	0	Dommages matériels inférieurs au seuil de rapportage	Montréal(06)	Montréal (66 )	1	0	0	0	0	0	0	0	0	0	0	0	1
SPVM _ 2012 _ 107	VE	2012/02/24	66023	4957			BD ST JEAN						15	1	9		21		11	40		9				17	2	0	0	0	12:00:00-12:59:00	2012	0	Dommages matériels inférieurs au seuil de rapportage	Montréal(06)	Montréal (66 )	1	0	0	0	0	0	0	0	0	0	0	0	1
SPVM _ 2012 _ 1070	ME	2012/11/28	66142					1	BD ST JEAN ET LAKE		31		12	1	3		13		11							11	2	0	0	0	15:00:00-15:59:00	2012	0	Dommages matériels inférieurs au seuil de rapportage	Montréal(06)	Montréal (66 )	2	0	0	0	0	0	0	0	0	0	0	0	0
SPVM _ 2012 _ 10700	JE	2012/03/29	66023	1464			CRESCENT				31		11		3		13					1				12	2	0	0	0	Non précisé	2012	0	Dommages matériels seulement	Montréal(06)	Montréal (66 )	1	1	0	0	0	0	0	0	0	0	0	0	0
SPVM _ 2012 _ 10701	VE	2012/03/30	66023				OVERDALE	1	LUCIEN L ALLIER	5			11	2	3		13		13	32		1				11	2	0	0	0	05:00:00-05:59:00	2012	0	Dommages matériels seulement	Montréal(06)	Montréal (66 )	1	0	0	0	0	0	0	0	0	0	0	0	1
SPVM _ 2012 _ 10702	JE	2012/03/29	66023	1909			AV DES CANADIENS DE MTL	2	STAT INT		31		11		3		21										2	0	0	0	22:00:00-22:59:00	2012	0	Dommages matériels inférieurs au seuil de rapportage	Montréal(06)	Montréal (66 )	2	0	0	0	0	0	0	0	0	0	0	0	0
SPVM _ 2012 _ 10703	VE	2012/03/30	66023	1201			RENE LEVESQUE				31		11	1	3		13		11	34		1				11	2	0	0	0	10:00:00-10:59:00	2012	0	Dommages matériels seulement	Montréal(06)	Montréal (66 )	1	0	0	0	0	0	0	1	0	0	0	0	0
SPVM _ 2012 _ 10704	MA	2012/03/27	66023	493			SHERBROOKE O				49		11	1	3		16		11	99		2				11	1	0	0	0	16:00:00-16:59:00	2012	0	Dommages matériels inférieurs au seuil de rapportage	Montréal(06)	Montréal (66 )	0	0	0	0	0	0	0	0	1	0	0	0	0
SPVM _ 2012 _ 10705	LU	2012/03/12	66023	1200			ST ALEXANDRE						12	3	2		13		11			1				11	2	0	0	0	23:00:00-23:59:00	2012	0	Dommages matériels seulement	Montréal(06)	Montréal (66 )	1	0	0	0	0	0	0	0	0	0	0	0	1
SPVM _ 2012 _ 10706	VE	2012/03/30	66023				MONTAGNE	1	MAISONNEUVE	30	31		11	3	3		13		11	33		2			N	11	2	0	0	0	22:00:00-22:59:00	2012	0	Dommages matériels inférieurs au seuil de rapportage	Montréal(06)	Montréal (66 )	2	0	0	0	0	0	0	0	0	0	0	0	0
SPVM _ 2012 _ 10707	SA	2012/03/31	66023	777			UNIVERSITY	1	N-D	5	31		11	1	3		13		11	33		3			N	11	2	0	0	0	12:00:00-12:59:00	2012	0	Dommages matériels seulement	Montréal(06)	Montréal (66 )	2	0	0	0	0	0	0	0	0	0	0	0	0
SPVM _ 2012 _ 10708	SA	2012/03/31	66023					1	DES PINS ET REDPATH	8	31		11	1	2		14		14	32		1			O	11	2	0	0	2	14:00:00-14:59:00	2012	2	Léger	Montréal(06)	Montréal (66 )	2	0	0	0	0	0	0	0	0	0	0	0	0
SPVM _ 2012 _ 10709	DI	2012/04/01	66023				SHERBROOKE	1	MC GILL COLLEGE		31		12	1	3		13		11	32		3				14	2	0	0	0	15:00:00-15:59:00	2012	0	Dommages matériels inférieurs au seuil de rapportage	Montréal(06)	Montréal (66 )	0	0	0	0	0	0	0	0	2	0	0	0	0
SPVM _ 2012 _ 1071	VE	2012/11/30	66142	1160			TECUMSEH	1	FENWOOD	20	31		11	1	2		14		11	33		2			S	11	2	0	0	0	Non précisé	2012	0	Dommages matériels seulement	Montréal(06)	Montréal (66 )	2	0	0	0	0	0	0	0	0	0	0	0	0
SPVM _ 2012 _ 10710	LU	2012/04/02	66023				PRESIDENT KENNEDY	1	MANSFIELD	40	31		11	3	3		13		11	33		2				11	3	0	0	0	03:00:00-03:59:00	2012	0	Dommages matériels seulement	Montréal(06)	Montréal (66 )	3	0	0	0	0	0	0	0	0	0	0	0	0
SPVM _ 2012 _ 10711	LU	2012/04/02	66023				DES PINS AV O	1	DR PENFIELD		49		12	3	2		14		12	32		3				14	1	0	0	1	05:00:00-05:59:00	2012	1	Léger	Montréal(06)	Montréal (66 )	1	0	0	0	0	0	0	0	0	0	0	0	0
SPVM _ 2012 _ 10712	LU	2012/04/02	66023				DE LA MONTAGNE	1	N-D O	5	31		11	1	3		13		11	32		2			S	11	2	0	0	0	13:00:00-13:59:00	2012	0	Dommages matériels inférieurs au seuil de rapportage	Montréal(06)	Montréal (66 )	1	0	0	1	0	0	0	0	0	0	0	0	0
SPVM _ 2012 _ 10713	LU	2012/04/02	66023				ST ANTOINE	1	PEEL		32		11	1	3		13	1	11	32	6	3				11	1	0	0	1	18:00:00-18:59:00	2012	1	Léger	Montréal(06)	Montréal (66 )	1	0	0	0	0	0	0	0	0	0	0	0	0
SPVM _ 2012 _ 10714	LU	2012/03/26	66023	1350			RENE LEVESQUE O						11	1	3		21		11	40		2				11	2	0	0	0	09:00:00-09:59:00	2012	0	Dommages matériels inférieurs au seuil de rapportage	Montréal(06)	Montréal (66 )	1	0	0	0	0	0	0	0	0	0	0	0	1
SPVM _ 2012 _ 10715	LU	2012/04/02	66023	1196			CAMILIEN HOUDE				59		14	3	9		12	1	23	34		2				11	2	0	0	0	21:00:00-21:59:00	2012	0	Dommages matériels seulement	Montréal(06)	Montréal (66 )	1	0	0	0	0	0	0	0	0	0	0	0	1
SPVM _ 2012 _ 10716	LU	2012/04/02	66023				MCGILL COLLEGE	1	SHERBROOKE		32		11	3	3		13		11	32		3				11	1	0	0	1	22:00:00-22:59:00	2012	1	Léger	Montréal(06)	Montréal (66 )	0	0	0	0	0	0	0	1	0	0	0	0	0
SPVM _ 2012 _ 10717	SA	2012/03/31	66023	1155			METCALFE FACE				31		11	1	3		13		11	34		1				11	2	0	0	0	06:00:00-06:59:00	2012	0	Dommages matériels inférieurs au seuil de rapportage	Montréal(06)	Montréal (66 )	1	0	0	0	0	0	0	0	0	0	0	0	1
SPVM _ 2012 _ 10718	MA	2012/04/03	66023				MCGREGOR	1	DOCTEUR PENFIELD		32		11	1	2		13	1	14	32	6	1				11	1	0	0	1	08:00:00-08:59:00	2012	1	Léger	Montréal(06)	Montréal (66 )	0	0	0	0	0	0	0	1	0	0	0	0	0
SPVM _ 2012 _ 10719	MA	2012/03/20	66023				STANLEY	1	MAISONNEUVE	20	31		11	1	3		13		11	33		1			S	11	2	0	0	0	14:00:00-14:59:00	2012	0	Dommages matériels inférieurs au seuil de rapportage	Montréal(06)	Montréal (66 )	1	1	0	0	0	0	0	0	0	0	0	0	0
SPVM _ 2012 _ 1072	VE	2012/11/30	66023	3345			BD DES SOURCES				31		11	1	3		21		11	40						11	2	0	0	0	11:00:00-11:59:00	2012	0	Dommages matériels inférieurs au seuil de rapportage	Montréal(06)	Montréal (66 )	2	0	0	0	0	0	0	0	0	0	0	0	0
SPVM _ 2012 _ 10720	LU	2012/03/26	66023				TERR VILLE DE MTL				31																2	0	0	0	Non précisé	2012	0	Dommages matériels inférieurs au seuil de rapportage	Montréal(06)	Montréal (66 )	1	0	0	0	0	0	0	0	0	0	0	0	1
SPVM _ 2012 _ 10721	MA	2012/04/03	66023	1175			CRESCENT	2	RENE LEVESQUE	50	31		11	1	3		13	1	11	34		1			N	11	2	0	0	1	17:00:00-17:59:00	2012	1	Léger	Montréal(06)	Montréal (66 )	2	0	0	0	0	0	0	0	0	0	0	0	0
SPVM _ 2012 _ 10722	SA	2012/03/31	66023				METCALFE ET MAISONNEUVE				31				3										N		2	0	0	0	Non précisé	2012	0	Dommages matériels seulement	Montréal(06)	Montréal (66 )	1	0	0	0	0	0	0	0	0	0	0	0	1
SPVM _ 2012 _ 10723	MA	2012/04/03	66023					1	AYLMER ET SHERBROOKE				11	1	3		13		11	32		1				11	2	0	0	0	17:00:00-17:59:00	2012	0	Dommages matériels inférieurs au seuil de rapportage	Montréal(06)	Montréal (66 )	2	0	0	0	0	0	0	0	0	0	0	0	0
SPVM _ 2012 _ 10724	ME	2012/04/04	66023	687			AV DES PINS	2	CH ROYAL VICTORIA		31		11	1	3		21									11	2	0	0	0	08:00:00-08:59:00	2012	0	Dommages matériels inférieurs au seuil de rapportage	Montréal(06)	Montréal (66 )	1	0	0	0	0	0	0	0	0	0	0	0	1
SPVM _ 2012 _ 10725	ME	2012/04/04	66023				STE CATHERINE O	1	GUY	100	31		11	1	3		13		11	33		1			O	12	2	0	0	0	13:00:00-13:59:00	2012	0	Dommages matériels seulement	Montréal(06)	Montréal (66 )	2	0	0	0	0	0	0	0	0	0	0	0	0
SPVM _ 2012 _ 10726	ME	2012/04/04	66023				DES SOEURS GRISES	1	WELLINGTON		49		11	1	3		13		11	32		2				11	2	0	0	0	15:00:00-15:59:00	2012	0	Dommages matériels seulement	Montréal(06)	Montréal (66 )	0	0	0	0	0	0	0	1	0	0	0	0	1
SPVM _ 2012 _ 10727	ME	2012/04/04	66023					1	SQUARE GALLERY ET OLIER	10			11	1	3		11		11	33		1				11	2	0	0	0	16:00:00-16:59:00	2012	0	Dommages matériels inférieurs au seuil de rapportage	Montréal(06)	Montréal (66 )	2	0	0	0	0	0	0	0	0	0	0	0	0
SPVM _ 2012 _ 10728	ME	2012/04/04	66023					1	MONTAGNE ET DR PENFIELD		31		11	1	2		14		12	32		2				11	2	0	0	0	10:00:00-10:59:00	2012	0	Dommages matériels seulement	Montréal(06)	Montréal (66 )	1	1	0	0	0	0	0	0	0	0	0	0	0
SPVM _ 2012 _ 10729	VE	2012/03/30	66023	1500			MCGILL COLLEGE				31		11	2	3		21		11	40		9				12	2	0	0	0	14:00:00-14:59:00	2012	0	Dommages matériels inférieurs au seuil de rapportage	Montréal(06)	Montréal (66 )	1	0	0	0	0	0	0	0	0	0	0	0	1
SPVM _ 2012 _ 1073	DI	2012/12/02	66142	3291			SOURCES	1	BRUNSWICK	10	32		11	1	3		21	1	11	40	10	2			S	12	1	0	0	1	09:00:00-09:59:00	2012	1	Léger	Montréal(06)	Montréal (66 )	1	0	0	0	0	0	0	0	0	0	0	0	0
SPVM _ 2012 _ 10730	VE	2012/04/06	66023				DELA MONTAGNE	1	WELLINGTON	2	31		11	1	2		13		11	32		2			E	11	2	0	0	0	Non précisé	2012	0	Dommages matériels inférieurs au seuil de rapportage	Montréal(06)	Montréal (66 )	2	0	0	0	0	0	0	0	0	0	0	0	0
SPVM _ 2012 _ 10731	SA	2012/04/07	66023	1250			GUY				31		11	3	3		21		11	99		9				11	2	0	0	0	22:00:00-22:59:00	2012	0	Dommages matériels seulement	Montréal(06)	Montréal (66 )	1	0	0	0	0	0	0	0	0	0	0	0	1
SPVM _ 2012 _ 10732	DI	2012/04/08	66023				CRESCENT	1	STE CATHERINE O	20	31		11	3	3		13		11	33		1			N	11	2	0	0	0	02:00:00-02:59:00	2012	0	Dommages matériels seulement	Montréal(06)	Montréal (66 )	1	0	0	0	0	0	0	0	0	0	0	0	1
SPVM _ 2012 _ 10733	DI	2012/04/08	66023				STANLEY	1	SHERBROOKE O		33		11	1	2		14	1	14	32	6	2				12	2	0	0	1	16:00:00-16:59:00	2012	1	Léger	Montréal(06)	Montréal (66 )	1	0	0	0	1	0	0	0	0	0	0	0	0
SPVM _ 2012 _ 10734	VE	2012/04/06	66023	687			AV DES PINS O				31		11	1	3		21		11							11	2	0	0	0	13:00:00-13:59:00	2012	0	Dommages matériels inférieurs au seuil de rapportage	Montréal(06)	Montréal (66 )	1	0	0	0	0	0	0	0	0	0	0	0	1
SPVM _ 2012 _ 10735	LU	2012/04/09	66023	700			WELLINGTON	1	KING	30	50		12	1	3		19		11	33		2			O	12	1	0	0	0	08:00:00-08:59:00	2012	0	Dommages matériels seulement	Montréal(06)	Montréal (66 )	1	0	0	0	0	0	0	0	0	0	0	0	0
SPVM _ 2012 _ 10736	LU	2012/04/09	66023				SHERBROOKE	1	MCGILL		31		12	1	3		13		11	33		3				12	2	0	0	0	13:00:00-13:59:00	2012	0	Dommages matériels seulement	Montréal(06)	Montréal (66 )	2	0	0	0	0	0	0	0	0	0	0	0	0
SPVM _ 2012 _ 10737	SA	2012/03/31	66023				DE LA MONTAGNE	1	MAISONNEUVE		31			1	3		21			99							2	0	0	0	15:00:00-15:59:00	2012	0	Dommages matériels inférieurs au seuil de rapportage	Montréal(06)	Montréal (66 )	1	0	0	0	0	0	0	0	0	0	0	0	1
SPVM _ 2012 _ 10738	LU	2012/04/09	66023				GAUCHETIERE	1	UNIVERSITY	5	31		11	3	3		13		11	33		1			E	12	2	0	0	0	21:00:00-21:59:00	2012	0	Dommages matériels inférieurs au seuil de rapportage	Montréal(06)	Montréal (66 )	1	0	0	0	0	0	0	1	0	0	0	0	0
SPVM _ 2012 _ 10739	MA	2012/04/10	66023	2021			UNION FACE				31		11	3	3		13		11	33		1				12	2	0	0	0	Non précisé	2012	0	Dommages matériels inférieurs au seuil de rapportage	Montréal(06)	Montréal (66 )	1	0	0	0	0	0	0	0	0	0	0	0	1
SPVM _ 2012 _ 1074	VE	2012/11/30	66097	2375			TRANSCANADIENNE				31		11	1	9		21		11	99		9				11	2	0	0	0	08:00:00-08:59:00	2012	0	Dommages matériels inférieurs au seuil de rapportage	Montréal(06)	Montréal (66 )	1	0	0	0	0	0	0	0	0	0	0	0	1
SPVM _ 2012 _ 10740	MA	2012/04/10	66023				UNIVERSITY	1	N-D		31		11	1	3	10	13	1	11	32	6	3			N	12	2	0	0	2	12:00:00-12:59:00	2012	2	Léger	Montréal(06)	Montréal (66 )	2	0	0	0	0	0	0	0	0	0	0	0	0
SPVM _ 2012 _ 10741	MA	2012/04/10	66023	1175			PL DU FRERE ANDRE	2	RENE LEVESQUE O		32		11	1	3		14	1	11	99	10	2				11	1	0	0	1	16:00:00-16:59:00	2012	1	Léger	Montréal(06)	Montréal (66 )	1	0	0	0	0	0	0	0	0	0	0	0	0
SPVM _ 2012 _ 10742	MA	2012/04/03	66023	3655			PRDE SIR WILLIAM OSLER				49		11		1		22		23	99		2					1	0	0	0	10:00:00-10:59:00	2012	0	Dommages matériels inférieurs au seuil de rapportage	Montréal(06)	Montréal (66 )	1	0	0	0	0	0	0	0	0	0	0	0	0
SPVM _ 2012 _ 10743	ME	2012/04/11	66023	687			DES PINS				33		11	1	3		13		13	33		2				11	2	0	0	0	14:00:00-14:59:00	2012	0	Dommages matériels inférieurs au seuil de rapportage	Montréal(06)	Montréal (66 )	1	0	0	0	1	0	0	0	0	0	0	0	0
SPVM _ 2012 _ 10744	MA	2012/04/10	66023	2000			MC GILL COLLEGE				31		11	1	3		21		11	40		2				11	2	0	0	0	10:00:00-10:59:00	2012	0	Dommages matériels inférieurs au seuil de rapportage	Montréal(06)	Montréal (66 )	2	0	0	0	0	0	0	0	0	0	0	0	0
SPVM _ 2012 _ 10745	JE	2012/04/12	66023				RENE LEVESQUE O	1	DE LA MONTAGNE		31		11	1	3		13	1	11	32	6	4				11	2	0	0	1	11:00:00-11:59:00	2012	1	Léger	Montréal(06)	Montréal (66 )	2	0	0	0	0	0	0	0	0	0	0	0	0
SPVM _ 2012 _ 10746	ME	2012/04/11	66023				VIGER	1	SQUARE VICTORIA	15	31		11	1	3		13		11	33		1			E	11	2	0	0	0	16:00:00-16:59:00	2012	0	Dommages matériels inférieurs au seuil de rapportage	Montréal(06)	Montréal (66 )	1	1	0	0	0	0	0	0	0	0	0	0	0
SPVM _ 2012 _ 10747	ME	2012/04/11	66023				ST CATHERINE	1	CRESCENT	75	31		11	1	3		13		11	32		1			N	11	2	0	0	0	13:00:00-13:59:00	2012	0	Dommages matériels inférieurs au seuil de rapportage	Montréal(06)	Montréal (66 )	1	0	0	0	0	0	0	0	0	0	0	0	1
SPVM _ 2012 _ 10748	ME	2012/04/11	66023				SHERBROOKE	1	DUROCHER	10	31		11	1	3		13		11	33		3				11	2	0	0	0	10:00:00-10:59:00	2012	0	Dommages matériels seulement	Montréal(06)	Montréal (66 )	1	0	0	0	0	0	0	0	0	0	0	0	1
SPVM _ 2012 _ 10749	JE	2012/04/12	66023				PEEL	1	ST ANTOINE		31		11	3	3		14	1	13	32	6	3				11	2	0	0	2	22:00:00-22:59:00	2012	2	Léger	Montréal(06)	Montréal (66 )	2	0	0	0	0	0	0	0	0	0	0	0	0
SPVM _ 2012 _ 1075	LU	2012/12/03	66142	3049			DEACON				31	9	12	1	3		19		11	99		2				11	2	0	0	0	09:00:00-09:59:00	2012	0	Dommages matériels seulement	Montréal(06)	Montréal (66 )	2	0	0	0	0	0	0	0	0	0	0	0	0
SPVM _ 2012 _ 10750	JE	2012/04/12	66023					1	ST JACQUES ET PEEL		31		11	3	3		13		11	32		3			N	11	2	0	0	0	23:00:00-23:59:00	2012	0	Dommages matériels seulement	Montréal(06)	Montréal (66 )	2	0	0	0	0	0	0	0	0	0	0	0	0
SPVM _ 2012 _ 10751	VE	2012/04/13	66023					2	980 GUY MONTREAL	10	49		11	3	9		29		11	99		9			O	99	1	0	0	0	01:00:00-01:59:00	2012	0	Dommages matériels inférieurs au seuil de rapportage	Montréal(06)	Montréal (66 )	0	0	0	0	0	0	0	0	1	0	0	0	0
SPVM _ 2012 _ 10752	VE	2012/04/13	66023					1	PEEL ET ST ANTOINE		31		11	3	3		13		11	32		3			S	11	2	0	0	0	04:00:00-04:59:00	2012	0	Dommages matériels seulement	Montréal(06)	Montréal (66 )	1	0	0	0	0	0	0	1	0	0	0	0	0
SPVM _ 2012 _ 10753	JE	2012/04/05	66023	1082			BEAVER HALL						11	1	3		21		11							11	2	0	0	0	09:00:00-09:59:00	2012	0	Dommages matériels inférieurs au seuil de rapportage	Montréal(06)	Montréal (66 )	2	0	0	0	0	0	0	0	0	0	0	0	0
SPVM _ 2012 _ 10754	VE	2012/04/13	66023	4095				1	COTE DES NEIGES		31		11	1	3		12		11	32		3				11	2	0	0	0	18:00:00-18:59:00	2012	0	Dommages matériels seulement	Montréal(06)	Montréal (66 )	2	0	0	0	0	0	0	0	0	0	0	0	0
SPVM _ 2012 _ 10755	SA	2012/01/28	66023	1425			DE LA MONTAGNE				31			1	3		14		11	33		2					2	0	0	0	Non précisé	2012	0	Dommages matériels seulement	Montréal(06)	Montréal (66 )	1	0	0	0	0	0	0	0	0	0	0	0	1
SPVM _ 2012 _ 10756	SA	2012/04/14	66023				SHERBROOKE O	1	STANLEY		33		11	1	3		13	1	11		6	3				11	2	0	0	1	Non précisé	2012	1	Léger	Montréal(06)	Montréal (66 )	1	0	0	0	1	0	0	0	0	0	0	0	0
SPVM _ 2012 _ 10757	SA	2012/04/14	66023				STE CATHERINE	1	MANSFIELD	5	31		11	1	3		13		11	33		1			O	12	2	0	0	0	17:00:00-17:59:00	2012	0	Dommages matériels inférieurs au seuil de rapportage	Montréal(06)	Montréal (66 )	2	0	0	0	0	0	0	0	0	0	0	0	0
SPVM _ 2012 _ 10758	SA	2012/04/14	66023	1155			GUY						11	3	3		21		21			1				11	1	0	0	0	23:00:00-23:59:00	2012	0	Dommages matériels seulement	Montréal(06)	Montréal (66 )	1	0	0	0	0	0	0	0	0	0	0	0	0
SPVM _ 2012 _ 10759	DI	2012/04/15	66023				DUKE	1	WILLIAM		31		11	1	3		13		11	31		1				11	2	0	0	1	16:00:00-16:59:00	2012	1	Léger	Montréal(06)	Montréal (66 )	2	0	0	0	0	0	0	0	0	0	0	0	0
SPVM _ 2012 _ 1076	LU	2012/12/03	66142				BD DES SOURCES	1	SALABERRY	100	31		11	1	3		13		11	33		4			E	11	2	0	0	0	16:00:00-16:59:00	2012	0	Dommages matériels inférieurs au seuil de rapportage	Montréal(06)	Montréal (66 )	1	0	0	0	0	0	0	0	0	0	0	0	1
SPVM _ 2012 _ 10760	SA	2012/04/14	66023					1	GUY ET MAISONNEUVE	15			11	3	3		13		13	33		2			S	11	2	0	0	0	17:00:00-17:59:00	2012	0	Dommages matériels inférieurs au seuil de rapportage	Montréal(06)	Montréal (66 )	1	0	0	0	0	0	0	0	0	0	0	0	1
SPVM _ 2012 _ 10761	LU	2012/04/16	66023				BISHOP	1	STE CATHERINE	75	31		11	1	3		13		11	32		1			S	11	2	0	0	0	09:00:00-09:59:00	2012	0	Dommages matériels inférieurs au seuil de rapportage	Montréal(06)	Montréal (66 )	2	0	0	0	0	0	0	0	0	0	0	0	0
SPVM _ 2012 _ 10762	LU	2012/04/16	66023	1155			UNIVERSITY	1	RENE LEVESQUE	15	31		11	1	3		13		11	33		1	1		N	11	2	0	0	0	13:00:00-13:59:00	2012	0	Dommages matériels seulement	Montréal(06)	Montréal (66 )	1	1	0	0	0	0	0	0	0	0	0	0	0
SPVM _ 2012 _ 10763	JE	2012/04/12	66023				PEEL	1	STE CATHERINE		31																2	0	0	0	Non précisé	2012	0	Dommages matériels seulement	Montréal(06)	Montréal (66 )	1	0	0	0	0	0	0	0	0	0	0	0	1
SPVM _ 2012 _ 10764	LU	2012/04/16	66023				LUCIEN LALLIER	1	ST ANTOINE	5			12	3	3		11		24			1				14	1	0	0	0	20:00:00-20:59:00	2012	0	Dommages matériels inférieurs au seuil de rapportage	Montréal(06)	Montréal (66 )	0	0	0	0	0	0	0	0	1	0	0	0	0
SPVM _ 2012 _ 10765	ME	2012/04/04	66023	475			PRESIDENT KENNEDY						11	3	3		13		11	34		1				11	2	0	0	0	20:00:00-20:59:00	2012	0	Dommages matériels inférieurs au seuil de rapportage	Montréal(06)	Montréal (66 )	1	0	0	0	0	0	0	0	0	0	0	0	1
SPVM _ 2012 _ 10766	MA	2012/04/17	66023				SHERBROOKE	1	COTE DES NEIGES		31		11	1	3		13	1	11	32	6	3				11	2	0	0	1	08:00:00-08:59:00	2012	1	Léger	Montréal(06)	Montréal (66 )	1	0	0	1	0	0	0	0	0	0	0	0	0
SPVM _ 2012 _ 10767	DI	2012/04/15	66023				DE LA COMMUNE	1	PRINCE	5	31				2		19		11	33		3					2	0	0	0	Non précisé	2012	0	Dommages matériels inférieurs au seuil de rapportage	Montréal(06)	Montréal (66 )	1	0	0	0	0	0	0	0	0	0	0	0	1
SPVM _ 2012 _ 10768	MA	2012/04/17	66023					1	MC GILL COLLEGE ET ST CATHERINE		33		11	1	3		13		11	32		3				11	2	0	0	0	13:00:00-13:59:00	2012	0	Dommages matériels inférieurs au seuil de rapportage	Montréal(06)	Montréal (66 )	1	0	0	0	1	0	0	0	0	0	0	0	0
SPVM _ 2012 _ 10769	MA	2012/04/17	66023					1	RENE LEVESQUE ET PEEL		31		11	1	3		13		11	32		3				11	2	0	0	0	17:00:00-17:59:00	2012	0	Dommages matériels inférieurs au seuil de rapportage	Montréal(06)	Montréal (66 )	1	0	0	0	0	0	0	1	0	0	0	0	0
SPVM _ 2012 _ 1077	JE	2012/11/29	66023								31																2	0	0	0	Non précisé	2012	0	Dommages matériels inférieurs au seuil de rapportage	Montréal(06)	Montréal (66 )	1	0	0	0	0	0	0	0	0	0	0	0	1
SPVM _ 2012 _ 10770	ME	2012/04/18	66023	1425			RENE LEVESQUE O	1	BISHOP		31		11	1	3		13		11	32		1				11	2	0	0	0	16:00:00-16:59:00	2012	0	Dommages matériels seulement	Montréal(06)	Montréal (66 )	2	0	0	0	0	0	0	0	0	0	0	0	0
SPVM _ 2012 _ 10771	ME	2012/04/18	66023	687			AV DES PINS O	2	STAT DE L URGENCE C H ROYAL VICTOR	100	31		11	3	9		21		22	34		3			N	11	2	0	0	0	23:00:00-23:59:00	2012	0	Dommages matériels inférieurs au seuil de rapportage	Montréal(06)	Montréal (66 )	1	0	0	0	0	0	0	1	0	0	0	0	0
SPVM _ 2012 _ 10772	ME	2012/04/18	66023				PEEL	1	CYPRES	2	31		11	1	3		13		11	32		2				11	2	0	0	0	18:00:00-18:59:00	2012	0	Dommages matériels seulement	Montréal(06)	Montréal (66 )	2	0	0	0	0	0	0	0	0	0	0	0	0
SPVM _ 2012 _ 10773	JE	2012/04/19	66023				METCALFE	1	SQUARE DORCHESTER		31		11	1	3		13	1	11	32	6	1			N	11	2	0	0	1	17:00:00-17:59:00	2012	1	Léger	Montréal(06)	Montréal (66 )	0	0	0	0	0	0	0	1	0	0	1	0	0
SPVM _ 2012 _ 10774	JE	2012/04/19	66023					1	MC GILL COLLEGE ET MAISONNEUVE		31		11	1	3		13		11	32		3				11	2	0	0	0	17:00:00-17:59:00	2012	0	Dommages matériels seulement	Montréal(06)	Montréal (66 )	1	0	0	0	0	0	0	0	0	0	0	0	1
SPVM _ 2012 _ 10775	VE	2012/04/20	66023				RENE LEVESQUE	1	DU BEAVER HALL		31		12	3	3		13	1	21	32	6	5				11	2	0	0	4	20:00:00-20:59:00	2012	4	Léger	Montréal(06)	Montréal (66 )	2	0	0	0	0	0	0	0	0	0	0	0	0
SPVM _ 2012 _ 10776	SA	2012/04/21	66023	1307			STE CATHERINE O						12	1	3		21		11	40		2				14	2	0	0	0	14:00:00-14:59:00	2012	0	Dommages matériels inférieurs au seuil de rapportage	Montréal(06)	Montréal (66 )	1	0	0	0	0	0	0	0	0	0	0	0	1
SPVM _ 2012 _ 10777	SA	2012/04/21	66023				GUY	1	RENE LEVESQUE		31		12	1	3		13		11	32		3				15	2	0	0	0	17:00:00-17:59:00	2012	0	Dommages matériels seulement	Montréal(06)	Montréal (66 )	2	0	0	0	0	0	0	0	0	0	0	0	0
SPVM _ 2012 _ 10778	SA	2012/04/21	66023				ST ANTOINE	1	DE LA MONTAGNE		31		12	3	3		13	1	14	32	2	3			N	14	3	0	0	2	18:00:00-18:59:00	2012	2	Léger	Montréal(06)	Montréal (66 )	2	1	0	0	0	0	0	0	0	0	0	0	0
SPVM _ 2012 _ 10779	SA	2012/04/21	66023				SHERBROOKE	1	STANLEY	5	31		12	2	3		13		11	32		1				14	2	0	0	0	20:00:00-20:59:00	2012	0	Dommages matériels inférieurs au seuil de rapportage	Montréal(06)	Montréal (66 )	1	0	0	0	0	0	0	1	0	0	0	0	0
SPVM _ 2012 _ 1078	MA	2012/11/27	66142	3400			DU MARCHE	2	C MEDICAL DU WEST ISLAND		31			2	3		21										2	0	0	0	Non précisé	2012	0	Dommages matériels seulement	Montréal(06)	Montréal (66 )	1	0	0	0	0	0	0	0	0	0	0	0	1
SPVM _ 2012 _ 10780	SA	2012/04/21	66023	1428			STANLEY	1	STE CATHERINE	20	31		12	3	3		13		11	33		1			N	14	2	0	0	0	20:00:00-20:59:00	2012	0	Dommages matériels inférieurs au seuil de rapportage	Montréal(06)	Montréal (66 )	2	0	0	0	0	0	0	0	0	0	0	0	0
SPVM _ 2012 _ 10781	SA	2012/04/21	66023					1	AV DU CANADIEN ET STANLEY		32		12	3	3		19	1	11	33	6	1			E	14	1	0	0	0	19:00:00-19:59:00	2012	0	Dommages matériels inférieurs au seuil de rapportage	Montréal(06)	Montréal (66 )	1	0	0	0	0	0	0	0	0	0	0	0	0
SPVM _ 2012 _ 10782	DI	2012/04/22	66023				STE CATHERINE O	1	MACKAY	5	31		12	3	3		13		11	32		1			O	14	2	0	0	0	03:00:00-03:59:00	2012	0	Dommages matériels seulement	Montréal(06)	Montréal (66 )	1	0	0	0	0	0	0	1	0	0	0	0	0
SPVM _ 2012 _ 10783	DI	2012/04/22	66023				DE LA MONTAGNE	1	ST ANTOINE		31		12	3	3		13	1	11	32	6	1				17	2	0	0	2	23:00:00-23:59:00	2012	2	Léger	Montréal(06)	Montréal (66 )	2	0	0	0	0	0	0	0	0	0	0	0	0
SPVM _ 2012 _ 10784	VE	2012/04/20	66023				SHERBROOKE	1	UNIVERSITY		31		11	1	3		13		11							11	2	0	0	0	17:00:00-17:59:00	2012	0	Dommages matériels inférieurs au seuil de rapportage	Montréal(06)	Montréal (66 )	1	0	0	0	0	0	0	0	0	0	0	0	1
SPVM _ 2012 _ 10785	MA	2012/04/24	66023				ST ANTOINE	1	DE LA CATHEDRALE		31		12	1	3		13	1	11	32	6	3				14	3	0	0	1	07:00:00-07:59:00	2012	1	Léger	Montréal(06)	Montréal (66 )	3	0	0	0	0	0	0	0	0	0	0	0	0
SPVM _ 2012 _ 10786	LU	2012/04/23	66023				CYPRESS	1	PEEL	25	31		12	1	3		13		11			2			O	14	2	0	0	0	15:00:00-15:59:00	2012	0	Dommages matériels seulement	Montréal(06)	Montréal (66 )	1	0	0	0	0	0	0	0	0	0	0	0	1
SPVM _ 2012 _ 10787	DI	2012/04/22	66023	1650			CEDAR				31			1	3		21										2	0	0	0	18:00:00-18:59:00	2012	0	Dommages matériels inférieurs au seuil de rapportage	Montréal(06)	Montréal (66 )	1	0	0	0	0	0	0	0	0	0	0	0	1
SPVM _ 2012 _ 10788	ME	2012/04/25	66023				BISHOP	1	MAISONNEUVE	25	31		11	3	3		14		11	33		1			N	12	2	0	0	0	03:00:00-03:59:00	2012	0	Dommages matériels seulement	Montréal(06)	Montréal (66 )	2	0	0	0	0	0	0	0	0	0	0	0	0
SPVM _ 2012 _ 10789	ME	2012/04/25	66023	3674			PEEL OPP				31		11	1	1		13		13	34		2				12	2	0	0	0	09:00:00-09:59:00	2012	0	Dommages matériels inférieurs au seuil de rapportage	Montréal(06)	Montréal (66 )	2	0	0	0	0	0	0	0	0	0	0	0	0
SPVM _ 2012 _ 1079	VE	2012/12/07	66023				TERRITOIRE DE MTL				31		11		3		21									12	2	0	0	0	Non précisé	2012	0	Dommages matériels inférieurs au seuil de rapportage	Montréal(06)	Montréal (66 )	1	0	0	0	0	0	0	0	0	0	0	0	1
SPVM _ 2012 _ 10790	MA	2012/04/24	66023				DRUMMOND		DOCTEUR PENFIELD		31		12	2	2							2				14	2	0	0	0	Non précisé	2012	0	Dommages matériels inférieurs au seuil de rapportage	Montréal(06)	Montréal (66 )	1	0	0	0	0	0	0	0	0	0	0	0	1
SPVM _ 2012 _ 10791	MA	2012/04/24	66023	1200			ST ALEXANDRE	2	RENE LEVESQUE	50	31		11	3	2		14		11						N	11	2	0	0	0	Non précisé	2012	0	Dommages matériels inférieurs au seuil de rapportage	Montréal(06)	Montréal (66 )	1	0	0	0	0	0	0	0	0	0	0	0	1
SPVM _ 2012 _ 10792	ME	2012/04/25	66023				BRENNAN	1	DE LA COMMUNE		31		11	3	4		19		11	34		2				11	2	0	0	0	21:00:00-21:59:00	2012	0	Dommages matériels inférieurs au seuil de rapportage	Montréal(06)	Montréal (66 )	2	0	0	0	0	0	0	0	0	0	0	0	0
SPVM _ 2012 _ 10793	ME	2012/04/25	66023				SHERBROOKE O	1	METCALFE				11	3	3		13		11	32		3				12	2	0	0	0	22:00:00-22:59:00	2012	0	Dommages matériels inférieurs au seuil de rapportage	Montréal(06)	Montréal (66 )	2	0	0	0	0	0	0	0	0	0	0	0	0
SPVM _ 2012 _ 10794	JE	2012/04/26	66023				ST JACQUES	1	UNIVERSITY		31		12	1	3		13		14	32		3				12	2	0	0	0	14:00:00-14:59:00	2012	0	Dommages matériels seulement	Montréal(06)	Montréal (66 )	1	0	0	0	0	0	0	0	1	0	0	0	0
SPVM _ 2012 _ 10795	VE	2012/04/06	66023				STE CATHERINE O	1	PEEL	40	31			3	3		13		11	33		1			E		2	0	0	0	Non précisé	2012	0	Dommages matériels inférieurs au seuil de rapportage	Montréal(06)	Montréal (66 )	1	0	0	0	0	0	0	0	0	0	0	0	1
SPVM _ 2012 _ 10796	JE	2012/04/26	66023				N-D	2	GUY	30	31		12	1	3		13		11	34		2			E	14	2	0	0	0	18:00:00-18:59:00	2012	0	Dommages matériels seulement	Montréal(06)	Montréal (66 )	1	0	0	0	0	0	0	1	0	0	0	0	0
SPVM _ 2012 _ 10797	VE	2012/04/27	66023				ST ANTOINE	1	LUCIEN L ALLIER		52		12	3	2		11	1	13	32		1				14	1	0	0	3	03:00:00-03:59:00	2012	3	Léger	Montréal(06)	Montréal (66 )	1	0	0	0	0	0	0	0	0	0	0	0	0
SPVM _ 2012 _ 10798	ME	2012/04/25	66023				MANSFIELD	1	STE CATHERINE	50	31		11	3	3		13		11	34		1			S	12	2	0	0	0	22:00:00-22:59:00	2012	0	Dommages matériels inférieurs au seuil de rapportage	Montréal(06)	Montréal (66 )	1	0	0	0	0	0	0	0	1	0	0	0	0
SPVM _ 2012 _ 10799	VE	2012/04/27	66023	1464			DE LA MONTAGNE				59		11	1	2		14		13	33		3				12	1	0	0	0	12:00:00-12:59:00	2012	0	Dommages matériels inférieurs au seuil de rapportage	Montréal(06)	Montréal (66 )	1	0	0	0	0	0	0	0	0	0	0	0	0
SPVM _ 2012 _ 108	LU	2012/02/27	66023				BD DES SOURCES	1	14E RUE	15	31	9	16	3	3		13		11	33		3			N	17	2	0	0	0	17:00:00-17:59:00	2012	0	Dommages matériels inférieurs au seuil de rapportage	Montréal(06)	Montréal (66 )	2	0	0	0	0	0	0	0	0	0	0	0	0
SPVM _ 2012 _ 1080	SA	2012/12/08	66142	4101			DES SOURCES				32		12	1	3		21		11	40						14	1	0	0	1	14:00:00-14:59:00	2012	1	Léger	Montréal(06)	Montréal (66 )	1	0	0	0	0	0	0	0	0	0	0	0	0
SPVM _ 2012 _ 10800	VE	2012/04/27	66023				GUY	1	BARRE	1	31		11	1	3		13		11	32		3			N	12	2	0	0	0	13:00:00-13:59:00	2012	0	Dommages matériels seulement	Montréal(06)	Montréal (66 )	1	0	0	1	0	0	0	0	0	0	0	0	0
SPVM _ 2012 _ 10801	VE	2012/04/27	66023				DE LA MONTAGNE	1	DES CANADIENS DE MTL		31		12	1	3		13		11	32		3			N	12	1	0	0	0	08:00:00-08:59:00	2012	0	Dommages matériels inférieurs au seuil de rapportage	Montréal(06)	Montréal (66 )	0	0	0	0	0	0	0	0	0	0	0	0	1
SPVM _ 2012 _ 10802	VE	2012/04/27	66023					1			33		11	1	3		13	1	11	32	6	3				12	2	0	0	1	15:00:00-15:59:00	2012	1	Léger	Montréal(06)	Montréal (66 )	1	0	0	0	1	0	0	0	0	0	0	0	0
SPVM _ 2012 _ 10803	LU	2012/04/23	66023	1625			DES PINS				31				3		21										2	0	0	0	Non précisé	2012	0	Dommages matériels inférieurs au seuil de rapportage	Montréal(06)	Montréal (66 )	1	0	0	0	0	0	0	0	0	0	0	0	1
SPVM _ 2012 _ 10804	VE	2012/04/27	66023	1			PL VILLE MARIE				31		11	1	3		21		11	99		9					2	0	0	0	15:00:00-15:59:00	2012	0	Dommages matériels inférieurs au seuil de rapportage	Montréal(06)	Montréal (66 )	1	0	0	0	0	0	0	0	0	0	0	0	1
SPVM _ 2012 _ 10805	SA	2012/04/28	66023				UNIVERSITY	1	N-D																N		2	0	0	0	16:00:00-16:59:00	2012	0	Dommages matériels seulement	Montréal(06)	Montréal (66 )	2	0	0	0	0	0	0	0	0	0	0	0	0
SPVM _ 2012 _ 10806	SA	2012/04/28	66023				STE CATHERINE	1	STANLEY	10	31		11	3	3		13		11	32		1			O	11	2	0	0	0	21:00:00-21:59:00	2012	0	Dommages matériels inférieurs au seuil de rapportage	Montréal(06)	Montréal (66 )	2	0	0	0	0	0	0	0	0	0	0	0	0
SPVM _ 2012 _ 10807	DI	2012/04/29	66023				ST ANTOINE	1	PEEL		31		11	3	3		13		11	32		3				11	2	0	0	0	00:00:00-00:59:00	2012	0	Dommages matériels seulement	Montréal(06)	Montréal (66 )	2	0	0	0	0	0	0	0	0	0	0	0	0
SPVM _ 2012 _ 10808	DI	2012/04/29	66023				MAISONNEUVE O	1	AYLMER		31		11	3	3		13	1	11	32	6	1				11	2	0	0	3	03:00:00-03:59:00	2012	3	Léger	Montréal(06)	Montréal (66 )	1	0	0	0	0	0	0	1	0	0	0	0	0
SPVM _ 2012 _ 10809	DI	2012/04/29	66023				MONTAGNE	1	STE CATHERINE O	10	31		11	3	3		13		11	33		2			S	11	2	0	0	0	03:00:00-03:59:00	2012	0	Dommages matériels inférieurs au seuil de rapportage	Montréal(06)	Montréal (66 )	1	0	0	0	0	0	0	1	0	0	0	0	0
SPVM _ 2012 _ 1081	LU	2012/11/26	66142	3079			DES SOURCES	2	STAT CANADIAN TIRE		31			2	3		21									12	2	0	0	0	Non précisé	2012	0	Dommages matériels inférieurs au seuil de rapportage	Montréal(06)	Montréal (66 )	1	0	0	0	0	0	0	0	0	0	0	0	1
SPVM _ 2012 _ 10810	JE	2012/04/26	66023				ST MAURICE	2	ST HENRI		31		11		3		21		11	33		2				11	2	0	0	0	08:00:00-08:59:00	2012	0	Dommages matériels inférieurs au seuil de rapportage	Montréal(06)	Montréal (66 )	1	0	0	0	0	0	0	0	0	0	0	0	1
SPVM _ 2012 _ 10811	VE	2012/04/20	66023					1	LUCIEN LALLIER ET ST ANTOINE		31		11	1	3		13		14	32		3				11	2	0	0	0	10:00:00-10:59:00	2012	0	Dommages matériels seulement	Montréal(06)	Montréal (66 )	2	0	0	0	0	0	0	0	0	0	0	0	0
SPVM _ 2012 _ 10812	DI	2012/04/29	66023				UNIVERSITY	1	DUKE		31		11	1	3		13		11	32		1			S	11	2	0	0	0	11:00:00-11:59:00	2012	0	Dommages matériels inférieurs au seuil de rapportage	Montréal(06)	Montréal (66 )	2	0	0	0	0	0	0	0	0	0	0	0	0
SPVM _ 2012 _ 10813	DI	2012/04/29	66023	1100			DOCTEUR PENFIELD				99		11	3	2		22		11	99		9				11	1	0	0	0	20:00:00-20:59:00	2012	0	Dommages matériels seulement	Montréal(06)	Montréal (66 )	1	0	0	0	0	0	0	0	0	0	0	0	0
SPVM _ 2012 _ 10814	DI	2012/04/29	66023				STE CATHERINE	1	METCALFE		31		11	1	3		13		11	32		1				11	2	0	0	0	16:00:00-16:59:00	2012	0	Dommages matériels inférieurs au seuil de rapportage	Montréal(06)	Montréal (66 )	1	0	0	0	0	0	0	0	0	0	0	0	1
SPVM _ 2012 _ 10815	VE	2012/04/27	66023				DES PINS	1	PEEL	2	31		11	1	2		13		11	32		2			O	11	2	0	0	0	16:00:00-16:59:00	2012	0	Dommages matériels seulement	Montréal(06)	Montréal (66 )	2	0	0	0	0	0	0	0	0	0	0	0	0
SPVM _ 2012 _ 10816	DI	2012/04/15	66023	429			MAYOR				31			1	3		14		11	34		1					2	0	0	0	14:00:00-14:59:00	2012	0	Dommages matériels seulement	Montréal(06)	Montréal (66 )	1	0	0	0	0	0	0	0	0	0	0	0	1
SPVM _ 2012 _ 10817	MA	2012/05/01	66023	1080			BEAVER HALL				31		12	1	3		13		13	33		1				13	2	0	0	0	12:00:00-12:59:00	2012	0	Dommages matériels inférieurs au seuil de rapportage	Montréal(06)	Montréal (66 )	2	0	0	0	0	0	0	0	0	0	0	0	0
SPVM _ 2012 _ 10818	MA	2012/05/01	66023				DE LA MONTAGNE	1	CANADIENS DE MTL	10	31		12	3	3		14		13	32		2			S	14	2	0	0	0	03:00:00-03:59:00	2012	0	Dommages matériels seulement	Montréal(06)	Montréal (66 )	1	1	0	0	0	0	0	0	0	0	0	0	0
SPVM _ 2012 _ 10819	MA	2012/05/01	66023				GUY		MAISONNEUVE		31		11	1	3		14	1	11	33	6	3				11	5	0	0	3	14:00:00-14:59:00	2012	3	Léger	Montréal(06)	Montréal (66 )	5	0	0	0	0	0	0	0	0	0	0	0	0
SPVM _ 2012 _ 1082	SA	2012/12/08	66142				ANSELME LAVIGNE ET WESTTPARK						11	3	2		14		11	32		2				11	2	0	0	0	17:00:00-17:59:00	2012	0	Dommages matériels inférieurs au seuil de rapportage	Montréal(06)	Montréal (66 )	2	0	0	0	0	0	0	0	0	0	0	0	0
SPVM _ 2012 _ 10820	MA	2012/05/01	66023				UNIVERSITY	1	N-D		31		11	2	3		13	1	11	32	6	3				12	2	0	0	1	18:00:00-18:59:00	2012	1	Léger	Montréal(06)	Montréal (66 )	2	0	0	0	0	0	0	0	0	0	0	0	0
SPVM _ 2012 _ 10821	MA	2012/05/01	66023					1	WILLIAM ET NAZARETH	20	31	2	12	3			14		11	39		1			N	14	2	0	0	0	22:00:00-22:59:00	2012	0	Dommages matériels seulement	Montréal(06)	Montréal (66 )	0	1	0	0	0	0	0	0	0	0	0	0	1
SPVM _ 2012 _ 10822	MA	2012/05/01	66023				GUY	1	ST JACQUES	10			12	3	3		13		13	33		2			N	14	1	0	0	0	05:00:00-05:59:00	2012	0	Dommages matériels seulement	Montréal(06)	Montréal (66 )	0	1	0	0	0	0	0	0	0	0	0	0	0
SPVM _ 2012 _ 10823	MA	2012/05/01	66023	1134			STE CATHERINE				31		11	1	3		21		11	99		9				99	2	0	0	0	10:00:00-10:59:00	2012	0	Dommages matériels inférieurs au seuil de rapportage	Montréal(06)	Montréal (66 )	2	0	0	0	0	0	0	0	0	0	0	0	0
SPVM _ 2012 _ 10824	ME	2012/04/25	66023				BISHOP	1	STE CATHERINE	10	31				3		13			33		2			N		2	0	0	0	17:00:00-17:59:00	2012	0	Dommages matériels inférieurs au seuil de rapportage	Montréal(06)	Montréal (66 )	1	0	0	0	0	0	0	0	0	0	0	0	1
SPVM _ 2012 _ 10825	ME	2012/05/02	66023	800			SQUARE VICTORIA				31		11	1	3		13		11	34		1				12	2	0	0	0	Non précisé	2012	0	Dommages matériels inférieurs au seuil de rapportage	Montréal(06)	Montréal (66 )	2	0	0	0	0	0	0	0	0	0	0	0	0
SPVM _ 2012 _ 10826	MA	2012/05/01	66023	3436			PEEL	1	SHERBROOKE		31		12	1	3		13		11	34		3				12	2	0	0	0	19:00:00-19:59:00	2012	0	Dommages matériels inférieurs au seuil de rapportage	Montréal(06)	Montréal (66 )	2	0	0	0	0	0	0	0	0	0	0	0	0
SPVM _ 2012 _ 10827	JE	2012/05/03	66023				STE CATHERINE	1	DRUMMOND		31		11	3	3		13		11	32		1				12	2	0	0	0	03:00:00-03:59:00	2012	0	Dommages matériels inférieurs au seuil de rapportage	Montréal(06)	Montréal (66 )	1	0	0	0	0	0	0	1	0	0	0	0	0
SPVM _ 2012 _ 10828	VE	2012/03/16	66023	1221			RENE LEVESQUE O	1	DE LA MONTAGNE		31		11	1	3		21		11	33		1				11	2	0	0	0	13:00:00-13:59:00	2012	0	Dommages matériels inférieurs au seuil de rapportage	Montréal(06)	Montréal (66 )	1	0	0	0	0	0	0	0	0	0	0	0	1
SPVM _ 2012 _ 10829	JE	2012/05/03	66023				MAISONNEUVE	1	METCALF		33		11	1	3		13	1	11	32	5	4			N	12	2	0	0	1	08:00:00-08:59:00	2012	1	Léger	Montréal(06)	Montréal (66 )	1	0	0	0	1	0	0	0	0	0	0	0	0
SPVM _ 2012 _ 1083	MA	2012/12/11	66142	120			WALLENBERG				31		11		2		14					2				11	2	0	0	0	Non précisé	2012	0	Dommages matériels seulement	Montréal(06)	Montréal (66 )	1	0	0	0	0	0	0	0	0	0	0	0	1
SPVM _ 2012 _ 10830	JE	2012/05/03	66023	1424			BISHOP				31			2	3		19		12	34		1					3	0	0	0	19:00:00-19:59:00	2012	0	Dommages matériels seulement	Montréal(06)	Montréal (66 )	2	0	0	0	0	0	0	0	0	0	0	0	1
SPVM _ 2012 _ 10831	JE	2012/05/03	66023				DR PENFIELD	1	AV DU MUSEE		31		11	1	2		14		12	32		1				11	2	0	0	0	10:00:00-10:59:00	2012	0	Dommages matériels inférieurs au seuil de rapportage	Montréal(06)	Montréal (66 )	1	0	0	0	0	0	0	0	0	0	0	0	1
SPVM _ 2012 _ 10832	JE	2012/05/03	66023				UNIVERSITE ET MAISONNEUVE	1			31		11	1	3		13		11	32		1			O	11	2	0	0	0	16:00:00-16:59:00	2012	0	Dommages matériels inférieurs au seuil de rapportage	Montréal(06)	Montréal (66 )	1	0	0	0	0	0	0	0	1	0	0	0	0
SPVM _ 2012 _ 10833	VE	2012/05/04	66023				ST ANTOINE	1	UNIVERSITY		31		12	3	3		13		11	32		3				12	2	0	0	0	03:00:00-03:59:00	2012	0	Dommages matériels seulement	Montréal(06)	Montréal (66 )	1	0	0	0	0	0	0	1	0	0	0	0	0
SPVM _ 2012 _ 10834	LU	2012/04/16	66023				MANSFIELD	1	SHERBROOKE		31		11	3	3		13		11	32		2			N	11	2	0	0	0	22:00:00-22:59:00	2012	0	Dommages matériels inférieurs au seuil de rapportage	Montréal(06)	Montréal (66 )	1	0	0	0	0	0	0	0	0	0	0	0	1
SPVM _ 2012 _ 10835	VE	2012/05/04	66023					1	PEEL ET ST JACQUES		31		12	2	3		13		11	32		3				14	2	0	0	0	19:00:00-19:59:00	2012	0	Dommages matériels seulement	Montréal(06)	Montréal (66 )	2	0	0	0	0	0	0	0	0	0	0	0	0
SPVM _ 2012 _ 10836	SA	2012/05/05	66023					1	CRESCENT ET STE CATHERINE O		31		11	3	3		13		11	99		1				11	2	0	0	0	03:00:00-03:59:00	2012	0	Dommages matériels inférieurs au seuil de rapportage	Montréal(06)	Montréal (66 )	0	0	0	0	0	0	0	2	0	0	0	0	0
SPVM _ 2012 _ 10837	MA	2012/05/01	66023	687			AV DES PINS O				31			1	9		21		11	99		9					2	0	0	0	07:00:00-07:59:00	2012	0	Dommages matériels seulement	Montréal(06)	Montréal (66 )	1	0	0	0	0	0	0	0	0	0	0	0	1
SPVM _ 2012 _ 10838	DI	2012/05/06	66023				MONTAGNE	1	MAISONNEUVE O	1	31		11	2	3		13		11	32		2			S	11	2	0	0	0	02:00:00-02:59:00	2012	0	Dommages matériels inférieurs au seuil de rapportage	Montréal(06)	Montréal (66 )	2	0	0	0	0	0	0	0	0	0	0	0	0
SPVM _ 2012 _ 10839	DI	2012/05/06	66023	1100			BEAVER HALL	1	RENE LEVESQUE	20	31		11	1	3		13		11	33		2			S	11	2	0	0	0	Non précisé	2012	0	Dommages matériels seulement	Montréal(06)	Montréal (66 )	1	0	0	0	0	0	0	0	0	0	0	0	1
SPVM _ 2012 _ 1084	DI	2012/12/02	66142				ST REGIS		SUNNYBROOKE		31		12		3		13					2				14	2	0	0	0	18:00:00-18:59:00	2012	0	Dommages matériels seulement	Montréal(06)	Montréal (66 )	2	0	0	0	0	0	0	0	0	0	0	0	0
SPVM _ 2012 _ 10840	LU	2012/05/07	66023	2250			GUY				31		11	1	3		13		12	34		3				11	2	0	0	0	08:00:00-08:59:00	2012	0	Dommages matériels seulement	Montréal(06)	Montréal (66 )	1	0	0	1	0	0	0	0	0	0	0	0	0
SPVM _ 2012 _ 10841	LU	2012/05/07	66023					1	BD RENE LEVESQUE O ET DRUMMOND		31		11	3	3		13		11	32		5				11	2	0	0	0	19:00:00-19:59:00	2012	0	Dommages matériels inférieurs au seuil de rapportage	Montréal(06)	Montréal (66 )	2	0	0	0	0	0	0	0	0	0	0	0	0
SPVM _ 2012 _ 10842	LU	2012/05/07	66023	1246			STE CATHERINE	1	MONTAGNE	50	31		11	3	3		13		11	33		1			E	11	2	0	0	0	19:00:00-19:59:00	2012	0	Dommages matériels inférieurs au seuil de rapportage	Montréal(06)	Montréal (66 )	2	0	0	0	0	0	0	0	0	0	0	0	0
SPVM _ 2012 _ 10843	DI	2012/05/06	66023				DE LA MONTAGNE	1	SHERBROOKE		31		12	3	3		13		11	34		2				12	1	0	0	0	23:00:00-23:59:00	2012	0	Dommages matériels inférieurs au seuil de rapportage	Montréal(06)	Montréal (66 )	1	0	0	0	0	0	0	0	0	0	0	0	0
SPVM _ 2012 _ 10844	MA	2012/05/08	66023				MACKAY	1	DE MAISONNEUVE	50	31		11	1	3		14		11	33		1			S	11	2	0	0	0	14:00:00-14:59:00	2012	0	Dommages matériels inférieurs au seuil de rapportage	Montréal(06)	Montréal (66 )	1	0	0	0	0	0	0	0	0	0	0	0	1
SPVM _ 2012 _ 10845	MA	2012/05/08	66023	2155				1	GUY		31		12	1	3		13		11	99		3				11	2	0	0	0	Non précisé	2012	0	Dommages matériels inférieurs au seuil de rapportage	Montréal(06)	Montréal (66 )	1	0	0	0	0	0	0	0	0	0	0	0	1
SPVM _ 2012 _ 10846	MA	2012/05/08	66023				DRUMMOND	1	SHERBROOKE		31		12	1	3		13		11			2				14	2	0	0	0	08:00:00-08:59:00	2012	0	Dommages matériels seulement	Montréal(06)	Montréal (66 )	2	0	0	0	0	0	0	0	0	0	0	0	0
SPVM _ 2012 _ 10847	ME	2012/05/09	66023	1425	0		RENE LEVESQUE PRES		STAT		31		11	1	3		21		11	99						12	2	0	0	0	15:00:00-15:59:00	2012	0	Dommages matériels seulement	Montréal(06)	Montréal (66 )	2	0	0	0	0	0	0	0	0	0	0	0	0
SPVM _ 2012 _ 10848	ME	2012/05/09	66023				SIR WILLIAM OSLER	1	DOCTEUR PENFIELD	30	31		11	1	2		14		13	34		2			N	12	2	0	0	0	08:00:00-08:59:00	2012	0	Dommages matériels seulement	Montréal(06)	Montréal (66 )	2	0	0	0	0	0	0	0	0	0	0	0	0
SPVM _ 2012 _ 10849	ME	2012/05/09	66023				LUCIEN L ALLIER	1	O ST ANTOINE		31		11	1	3		13		11	32		1				12	2	0	0	0	16:00:00-16:59:00	2012	0	Dommages matériels seulement	Montréal(06)	Montréal (66 )	2	0	0	0	0	0	0	0	0	0	0	0	0
SPVM _ 2012 _ 1085	ME	2012/12/12	66142				ST JEAN	1	SALABERRY	20	31		11	2	3		13		11	32		3			S	12	4	0	0	0	15:00:00-15:59:00	2012	0	Dommages matériels seulement	Montréal(06)	Montréal (66 )	2	1	0	0	0	0	0	0	0	0	0	0	1
SPVM _ 2012 _ 10850	ME	2012/05/09	66023				DE MAISONNEUVE O	1	MANSFIELD	5	31		11	1	3		13		11	32		1			E	12	2	0	0	0	17:00:00-17:59:00	2012	0	Dommages matériels inférieurs au seuil de rapportage	Montréal(06)	Montréal (66 )	1	0	0	0	0	0	0	1	0	0	0	0	0
SPVM _ 2012 _ 10851	ME	2012/05/09	66023				TERR VILLE DE MTL				31																2	0	0	0	Non précisé	2012	0	Dommages matériels inférieurs au seuil de rapportage	Montréal(06)	Montréal (66 )	1	0	0	0	0	0	0	0	0	0	0	0	1
SPVM _ 2012 _ 10852	JE	2012/05/10	66023				N-D	1	L AQUEDUC	5	33			1	2		14	1	11	33	6	3			O	11	2	0	0	1	09:00:00-09:59:00	2012	1	Léger	Montréal(06)	Montréal (66 )	0	1	0	0	1	0	0	0	0	0	0	0	0
SPVM _ 2012 _ 10853	JE	2012/05/10	66023				DU PARC	1	COTE STE CATHERINE	15	31		11	1	3		13		11	33		1			N	11	2	0	0	0	11:00:00-11:59:00	2012	0	Dommages matériels seulement	Montréal(06)	Montréal (66 )	1	0	0	0	0	0	0	1	0	0	0	0	0
SPVM _ 2012 _ 10854	JE	2012/05/10	66023						PRES DE BEAVER HALL ET BELMONT		31		12	1	3		16		13			2				14	2	0	0	0	14:00:00-14:59:00	2012	0	Dommages matériels inférieurs au seuil de rapportage	Montréal(06)	Montréal (66 )	2	0	0	0	0	0	0	0	0	0	0	0	0
SPVM _ 2012 _ 10855	JE	2012/05/10	66023				ST ALEXANDRE	1	RENE LEVESQUE		31		12	1	3		14		11	32		1				11	2	0	0	0	Non précisé	2012	0	Dommages matériels inférieurs au seuil de rapportage	Montréal(06)	Montréal (66 )	1	0	0	0	0	0	0	0	0	0	0	0	1
SPVM _ 2012 _ 10856	VE	2012/05/11	66023	1501			MC GILL COLLEGE				31		11	1	2		13		11	33		3				11	2	0	0	0	13:00:00-13:59:00	2012	0	Dommages matériels seulement	Montréal(06)	Montréal (66 )	1	0	0	0	0	0	0	1	0	0	0	0	0
SPVM _ 2012 _ 10857	VE	2012/05/11	66023	938					ST MAURICE		31		11	1	3		14		11	33		1				11	2	0	0	0	16:00:00-16:59:00	2012	0	Dommages matériels inférieurs au seuil de rapportage	Montréal(06)	Montréal (66 )	1	0	0	0	0	0	1	0	0	0	0	0	0
SPVM _ 2012 _ 10858	DI	2012/04/29	66023				PEEL	1	DE PENNFIELD		31		11	3	3		13		12	33		3				11	2	0	0	0	00:00:00-00:59:00	2012	0	Dommages matériels seulement	Montréal(06)	Montréal (66 )	2	0	0	0	0	0	0	0	0	0	0	0	0
SPVM _ 2012 _ 10859	SA	2012/05/12	66023	3650			MC TAVISH	1	DR PENFIELD		31		11	1	3		19		13	34		1				11	2	0	0	0	12:00:00-12:59:00	2012	0	Dommages matériels seulement	Montréal(06)	Montréal (66 )	2	0	0	0	0	0	0	0	0	0	0	0	0
SPVM _ 2012 _ 1086	JE	2012/12/13	66142	11624			BD DE SALABERRY				31	9	17	2	3		21		11	40		9				99	2	0	0	0	18:00:00-18:59:00	2012	0	Dommages matériels inférieurs au seuil de rapportage	Montréal(06)	Montréal (66 )	1	0	0	0	0	0	0	0	0	0	0	0	1
SPVM _ 2012 _ 10860	SA	2012/05/12	66023				DE LA MONTAGNE	1	MAISONNEUV EO	75	31		11	1	1		19		11	33					N	11	2	0	0	0	16:00:00-16:59:00	2012	0	Dommages matériels seulement	Montréal(06)	Montréal (66 )	1	0	0	0	0	0	0	0	0	0	0	0	1
SPVM _ 2012 _ 10861	SA	2012/05/12	66023	1196			CAMMILIEN HOUDE				52		12	3	7		15	1	13	34	6	2				14	1	0	0	2	20:00:00-20:59:00	2012	2	Léger	Montréal(06)	Montréal (66 )	1	0	0	0	0	0	0	0	0	0	0	0	0
SPVM _ 2012 _ 10862	DI	2012/05/13	66023				TERR MTL																				2	0	0	0	Non précisé	2012	0	Dommages matériels inférieurs au seuil de rapportage	Montréal(06)	Montréal (66 )	0	0	0	0	0	0	0	1	0	0	0	0	1
SPVM _ 2012 _ 10863	DI	2012/05/13	66023	671			DE LA GAUCHETIERE				31		11	1	3		21		11	34		2				11	2	0	0	0	09:00:00-09:59:00	2012	0	Dommages matériels seulement	Montréal(06)	Montréal (66 )	1	0	0	0	0	0	0	0	0	0	0	0	1
SPVM _ 2012 _ 10864	DI	2012/05/13	66023				HILL PARK	1	HILL PARK CIRCLE	10	31		11	3	2		14		11	33		2			E	11	2	0	0	0	22:00:00-22:59:00	2012	0	Dommages matériels seulement	Montréal(06)	Montréal (66 )	2	0	0	0	0	0	0	0	0	0	0	0	0
SPVM _ 2012 _ 10865	LU	2012/05/14	66023				GUY	1	DE MAISONNEUVE		32		11	1	3		13	1	11	32	6	3				11	1	0	0	1	07:00:00-07:59:00	2012	1	Léger	Montréal(06)	Montréal (66 )	1	0	0	0	0	0	0	0	0	0	0	0	0
SPVM _ 2012 _ 10866	LU	2012/05/14	66023					2	DOCTEUR PENFIELD ET AV DES PINS	10	31		11	1	5		13	1	13	33	6	1			S	11	2	0	0	2	10:00:00-10:59:00	2012	2	Léger	Montréal(06)	Montréal (66 )	2	0	0	0	0	0	0	0	0	0	0	0	0
SPVM _ 2012 _ 10867	LU	2012/05/14	66023				RENE LEVESQUE	1	DRUMMOND		31		11	1	3		13		11	32		5				11	2	0	0	0	13:00:00-13:59:00	2012	0	Dommages matériels seulement	Montréal(06)	Montréal (66 )	2	0	0	0	0	0	0	0	0	0	0	0	0
SPVM _ 2012 _ 10868	LU	2012/05/14	66023								38		11	2		15	11		11	37		5	2	S		11	1	0	0	0	21:00:00-21:59:00	2012	0	Dommages matériels inférieurs au seuil de rapportage	Montréal(06)	Montréal (66 )	0	1	0	0	0	0	0	0	0	0	0	0	0
SPVM _ 2012 _ 10869	MA	2012/05/15	66023				RENE LEVESQUE	1	DE LA MONTAGNE		31		12	1	3		13	1	11	32	6	3				12	2	0	0	1	07:00:00-07:59:00	2012	1	Léger	Montréal(06)	Montréal (66 )	0	0	0	0	0	1	0	1	0	0	0	0	0
SPVM _ 2012 _ 1087	VE	2012/12/14	66142				BD DES SOURCES	1	BRUNSWICK	30	31		11	3	3		13		11	33		3			S	11	2	0	0	0	17:00:00-17:59:00	2012	0	Dommages matériels seulement	Montréal(06)	Montréal (66 )	2	0	0	0	0	0	0	0	0	0	0	0	0
SPVM _ 2012 _ 10870	MA	2012/05/15	66023				STE CATHERINE	1	UNIVERSITE	10	31		11	1	3		13		11	34		1			O	11	2	0	0	0	17:00:00-17:59:00	2012	0	Dommages matériels inférieurs au seuil de rapportage	Montréal(06)	Montréal (66 )	2	0	0	0	0	0	0	0	0	0	0	0	0
SPVM _ 2012 _ 10871	SA	2012/05/12	66023				DU PRESIDENT KENNEDY ET AYLMER			15			11	1	3		13		11	33		1			N	11	2	0	0	0	Non précisé	2012	0	Dommages matériels inférieurs au seuil de rapportage	Montréal(06)	Montréal (66 )	1	0	0	0	0	0	0	0	0	0	0	0	1
SPVM _ 2012 _ 10872	MA	2012/05/15	66023				ST ANTOINE		DE LA MONTAGNE	10	31		12	2	7		13		11	33		1			E	14	2	0	0	0	20:00:00-20:59:00	2012	0	Dommages matériels inférieurs au seuil de rapportage	Montréal(06)	Montréal (66 )	2	0	0	0	0	0	0	0	0	0	0	0	0
SPVM _ 2012 _ 10873	ME	2012/05/16	66023	1050			BEAVER HALL	1	DE LA GAUCHETIERE O	10	31		11	3	3		13		13	33		2			N	11	3	0	0	0	00:00:00-00:59:00	2012	0	Dommages matériels seulement	Montréal(06)	Montréal (66 )	2	1	0	0	0	0	0	0	0	0	0	0	0
SPVM _ 2012 _ 10874	LU	2012/04/23	66023				STANLEY ET SHERBROOKE			100	32		11	1	3		13		11			1			N	11	2	0	0	0	Non précisé	2012	0	Dommages matériels inférieurs au seuil de rapportage	Montréal(06)	Montréal (66 )	1	0	0	0	0	0	0	0	0	0	0	0	1
SPVM _ 2012 _ 10875	ME	2012/05/16	66023				PEEL	1	RENE LEVESQUE	30	31		11	1	3		13		11	33		1			S	12	2	0	0	0	13:00:00-13:59:00	2012	0	Dommages matériels seulement	Montréal(06)	Montréal (66 )	2	0	0	0	0	0	0	0	0	0	0	0	0
SPVM _ 2012 _ 10876	ME	2012/05/16	66023	600			DE LA MONTAGNE				31		11	1	2		14		11	34		2				11	3	0	0	0	14:00:00-14:59:00	2012	0	Dommages matériels seulement	Montréal(06)	Montréal (66 )	3	0	0	0	0	0	0	0	0	0	0	0	0
SPVM _ 2012 _ 10877	LU	2012/05/07	66023					1	METCALFE ET RENE LEVESQUE	20	31		11	1	3		13		11	32		1			N	11	2	0	0	0	17:00:00-17:59:00	2012	0	Dommages matériels inférieurs au seuil de rapportage	Montréal(06)	Montréal (66 )	1	0	0	1	0	0	0	0	0	0	0	0	0
SPVM _ 2012 _ 10878	ME	2012/05/16	66023				CRESCENT	1	MAISONNEUVE	1	31		11	1	3		13		11	32		1			S	11	2	0	0	0	16:00:00-16:59:00	2012	0	Dommages matériels inférieurs au seuil de rapportage	Montréal(06)	Montréal (66 )	1	0	0	0	0	0	0	1	0	0	0	0	0
SPVM _ 2012 _ 10879	ME	2012/05/16	66023				BEAVER HALL	1	RENE LEVESQUE	50	31		11	1	3		21		11	99		9			S	12	2	0	0	0	08:00:00-08:59:00	2012	0	Dommages matériels seulement	Montréal(06)	Montréal (66 )	1	0	0	0	0	0	0	0	0	0	0	0	1
SPVM _ 2012 _ 1088	SA	2012/12/15	66142				BRUNSWICK	1	DAVIGNON		31		11	3	3		13	1	11	33		3				11	3	0	0	2	19:00:00-19:59:00	2012	2	Léger	Montréal(06)	Montréal (66 )	3	0	0	0	0	0	0	0	0	0	0	0	0
SPVM _ 2012 _ 10880	ME	2012/05/16	66023				COTE DES NEIGES	1	SUMMERHILL		32		11	2	2		19	1	12	33	6	3				11	1	0	1	0	21:00:00-21:59:00	2012	1	Grave	Montréal(06)	Montréal (66 )	1	0	0	0	0	0	0	0	0	0	0	0	0
SPVM _ 2012 _ 10881	JE	2012/05/17	66023	1234			MONTAGNE	1	STE CATHERINE	60	31		11	3	3		13		11	33		2			S	11	3	0	0	0	02:00:00-02:59:00	2012	0	Dommages matériels inférieurs au seuil de rapportage	Montréal(06)	Montréal (66 )	2	0	0	0	0	0	0	1	0	0	0	0	0
SPVM _ 2012 _ 10882	JE	2012/05/17	66023				MANSFIELD	1	RENE LEVESQUE O	24	31		11	1	3		19		13	34		1			S	11	4	0	0	0	07:00:00-07:59:00	2012	0	Dommages matériels inférieurs au seuil de rapportage	Montréal(06)	Montréal (66 )	0	0	0	1	0	0	0	2	0	0	0	0	1
SPVM _ 2012 _ 10883	JE	2012/05/17	66023				N-D O	1	GAUVIN				11	1	3		13		11	32		1				11	2	0	0	0	14:00:00-14:59:00	2012	0	Dommages matériels seulement	Montréal(06)	Montréal (66 )	1	1	0	0	0	0	0	0	0	0	0	0	0
SPVM _ 2012 _ 10884	VE	2012/05/18	66023				GUY	1	RENE LEVESQUE O		31		11	1	3		19	1	11	34	6	3				11	2	0	0	1	09:00:00-09:59:00	2012	1	Léger	Montréal(06)	Montréal (66 )	1	0	0	0	0	0	1	0	0	0	0	0	0
SPVM _ 2012 _ 10885	VE	2012/05/18	66023				ST ALEXANDRE	1	MAYOY	5	31		11	1	2		14		11	32		1			S	11	2	0	0	0	08:00:00-08:59:00	2012	0	Dommages matériels inférieurs au seuil de rapportage	Montréal(06)	Montréal (66 )	0	0	0	0	0	1	0	0	0	0	0	0	1
SPVM _ 2012 _ 10886	LU	2012/05/07	66023				ST ANTOINE	1	MANSFIELD		31			1	3		13										2	0	0	0	12:00:00-12:59:00	2012	0	Dommages matériels inférieurs au seuil de rapportage	Montréal(06)	Montréal (66 )	1	0	0	0	0	0	0	0	0	0	0	0	1
SPVM _ 2012 _ 10887	JE	2012/05/17	66023				ST ALEXANDRE	1	RENE LEVESQUE		31		11	1	3		21		11	99		2				11	2	0	0	0	Non précisé	2012	0	Dommages matériels seulement	Montréal(06)	Montréal (66 )	1	0	0	0	0	0	0	0	0	0	0	0	1
SPVM _ 2012 _ 10888	SA	2012/05/19	66023				RENE LEVESQUE	1	CRESCENT		31		11	3	3		13		11	32		3				11	2	0	0	0	23:00:00-23:59:00	2012	0	Dommages matériels inférieurs au seuil de rapportage	Montréal(06)	Montréal (66 )	1	0	0	0	0	0	0	1	0	0	0	0	0
SPVM _ 2012 _ 10889	DI	2012/05/20	66023				MANSFIELD	1	STE CATHERINE		31																2	0	0	0	Non précisé	2012	0	Dommages matériels seulement	Montréal(06)	Montréal (66 )	1	0	0	0	0	0	0	0	0	0	0	0	1
SPVM _ 2012 _ 1089	DI	2012/12/16	66142	28			FLORENCE		OPP AU																		2	0	0	0	21:00:00-21:59:00	2012	0	Dommages matériels seulement	Montréal(06)	Montréal (66 )	1	0	0	0	0	0	0	0	0	0	0	0	1
SPVM _ 2012 _ 10890	DI	2012/05/20	66023				STE CATHERINE O	1	DRUMMOND	10	31		11	3	3		19		11	34		1			O	11	2	0	0	0	22:00:00-22:59:00	2012	0	Dommages matériels seulement	Montréal(06)	Montréal (66 )	1	0	0	1	0	0	0	0	0	0	0	0	0
SPVM _ 2012 _ 10891	VE	2012/05/18	66023				DR PENFIELD		SIMPSON		31		11	1	2		13		11	34		1				11	2	0	0	0	Non précisé	2012	0	Dommages matériels seulement	Montréal(06)	Montréal (66 )	1	0	0	0	0	0	0	0	0	0	0	0	1
SPVM _ 2012 _ 10892	VE	2012/04/13	66023				STE CATHERINE O	1	UNION PRES DE		31		99	1	3		21		11	99		9				99	2	0	0	0	09:00:00-09:59:00	2012	0	Dommages matériels seulement	Montréal(06)	Montréal (66 )	1	0	0	0	0	0	0	0	0	0	0	0	1
SPVM _ 2012 _ 10893	LU	2012/05/21	66023				MURRAY	1	WILLIAM		31	1	11	1	3		13		11	32		1				11	3	0	0	0	15:00:00-15:59:00	2012	0	Dommages matériels seulement	Montréal(06)	Montréal (66 )	3	0	0	0	0	0	0	0	0	0	0	0	0
SPVM _ 2012 _ 10894	LU	2012/05/21	66023				OLIER	1	SEMINAIRE		52		11	1	7		13		11	32		1				11	2	0	0	0	18:00:00-18:59:00	2012	0	Dommages matériels seulement	Montréal(06)	Montréal (66 )	1	0	0	0	0	0	0	0	0	0	0	0	1
SPVM _ 2012 _ 10895	MA	2012/05/22	66023				GUY	1	LINCOLN		32		12	1	3		13	1	14	32	6	2				14	1	0	0	1	11:00:00-11:59:00	2012	1	Léger	Montréal(06)	Montréal (66 )	1	0	0	0	0	0	0	0	0	0	0	0	0
SPVM _ 2012 _ 10896	SA	2012/05/19	66023				RENE LEVESQUE	1	LUCIEN LALLIER		31		11	3	3		13		11	32		5				12	2	0	0	0	22:00:00-22:59:00	2012	0	Dommages matériels seulement	Montréal(06)	Montréal (66 )	1	0	0	0	0	0	0	0	0	0	0	0	1
SPVM _ 2012 _ 10897	MA	2012/05/22	66023				CRESCENT	1	STE CATHERINE		33		11	1	3		13		11	33		1				11	2	0	0	0	13:00:00-13:59:00	2012	0	Dommages matériels inférieurs au seuil de rapportage	Montréal(06)	Montréal (66 )	1	0	0	0	1	0	0	0	0	0	0	0	0
SPVM _ 2012 _ 10898	MA	2012/05/22	66023	1			PL VILLE MARIE				41		12		3		21			99						14	2	0	0	0	Non précisé	2012	0	Dommages matériels seulement	Montréal(06)	Montréal (66 )	1	0	0	0	0	0	0	0	0	0	0	0	1
SPVM _ 2012 _ 10899	MA	2012/05/22	66023	1650			CEDAR				31		11	1	3		13		11							11	2	0	0	0	15:00:00-15:59:00	2012	0	Dommages matériels inférieurs au seuil de rapportage	Montréal(06)	Montréal (66 )	2	0	0	0	0	0	0	0	0	0	0	0	0
SPVM _ 2012 _ 109	LU	2012/02/27	66023				17E AV	1	GENERAL BROCK		31		18	1	2		14		11	32		2				11	3	0	0	0	16:00:00-16:59:00	2012	0	Dommages matériels inférieurs au seuil de rapportage	Montréal(06)	Montréal (66 )	3	0	0	0	0	0	0	0	0	0	0	0	0
SPVM _ 2012 _ 1090	MA	2012/12/18	66142	69			BRUNSWICK				40		15	1	3		13	1	11	34	6	5			O	17	1	0	0	1	12:00:00-12:59:00	2012	1	Léger	Montréal(06)	Montréal (66 )	1	0	0	0	0	0	0	0	0	0	0	0	0
SPVM _ 2012 _ 10900	VE	2012/05/18	66023	1175			CRESCENT		RENE LEVESQUE	70	31		11	3	3		13		11	33		1			S	11	2	0	0	0	22:00:00-22:59:00	2012	0	Dommages matériels inférieurs au seuil de rapportage	Montréal(06)	Montréal (66 )	1	0	0	0	0	0	0	0	0	0	0	0	1
SPVM _ 2012 _ 10901	MA	2012/05/22	66023				MCTAVISH	1	DES PINS	30	33		12	1	1		13	1	13	33	6	1			S	15	2	0	0	1	17:00:00-17:59:00	2012	1	Léger	Montréal(06)	Montréal (66 )	0	0	0	0	1	0	0	1	0	0	0	0	0
SPVM _ 2012 _ 10902	MA	2012/05/22	66023	1025			DES PINS O				31		12	1	9		21		11	99		9			N	15	2	0	0	0	15:00:00-15:59:00	2012	0	Dommages matériels inférieurs au seuil de rapportage	Montréal(06)	Montréal (66 )	1	0	0	0	0	0	0	0	0	0	0	0	1
SPVM _ 2012 _ 10903	MA	2012/05/22	66023	966			STE CATHERINE				31		11	1	3		13		11	34		1				12	2	0	0	0	17:00:00-17:59:00	2012	0	Dommages matériels inférieurs au seuil de rapportage	Montréal(06)	Montréal (66 )	1	0	0	1	0	0	0	0	0	0	0	0	0
SPVM _ 2012 _ 10904	ME	2012/05/23	66023				MANSFIELD	1	CARTHCART	2	31		11	3	3		14	1	21	32	6	1			N	11	2	0	0	0	22:00:00-22:59:00	2012	0	Dommages matériels inférieurs au seuil de rapportage	Montréal(06)	Montréal (66 )	0	0	0	0	0	0	0	0	2	0	0	0	0
SPVM _ 2012 _ 10905	ME	2012/05/23	66023					1	MCGILL COLLEGE ET CATHCART	2	31	9	11	3	3		14		11	32		1			S	11	2	0	0	0	Non précisé	2012	0	Dommages matériels seulement	Montréal(06)	Montréal (66 )	0	0	0	0	0	0	0	0	1	0	0	0	1
SPVM _ 2012 _ 10906	MA	2012/05/22	66023				AV DES PINS	1	PEEL		31		11	1	3		13		12	32		3				12	2	0	0	0	14:00:00-14:59:00	2012	0	Dommages matériels inférieurs au seuil de rapportage	Montréal(06)	Montréal (66 )	1	1	0	0	0	0	0	0	0	0	0	0	0
SPVM _ 2012 _ 10907	DI	2012/05/20	66023					1	MONTAGNE ET STE CATHERINE		31		11	1	3		13		11	33		2				11	2	0	0	0	Non précisé	2012	0	Dommages matériels inférieurs au seuil de rapportage	Montréal(06)	Montréal (66 )	2	0	0	0	0	0	0	0	0	0	0	0	0
SPVM _ 2012 _ 10908	MA	2012/05/22	66023	1080			BEAVER HALL 50 M		RENE LEVESQUE		31		12	1	3		13		11	33		2			N	14	2	0	0	0	Non précisé	2012	0	Dommages matériels inférieurs au seuil de rapportage	Montréal(06)	Montréal (66 )	1	1	0	0	0	0	0	0	0	0	0	0	0
SPVM _ 2012 _ 10909	ME	2012/05/16	66023	980			GUY				49		11	1	3		21		11	99		1				11	1	0	0	0	10:00:00-10:59:00	2012	0	Dommages matériels inférieurs au seuil de rapportage	Montréal(06)	Montréal (66 )	0	0	0	0	0	0	0	0	1	0	0	0	0
SPVM _ 2012 _ 1091	ME	2012/12/19	66142	11608			SALABERRY	1	DU MARCHE	20	31		12	1	3		21		11	40					O	12	4	0	0	0	14:00:00-14:59:00	2012	0	Dommages matériels seulement	Montréal(06)	Montréal (66 )	4	0	0	0	0	0	0	0	0	0	0	0	0
SPVM _ 2012 _ 10910	MA	2012/05/22	66023				UNIVERSITY	1	ST ANTOINE		31		12	1	3		13		14	33		3				15	2	0	0	0	17:00:00-17:59:00	2012	0	Dommages matériels inférieurs au seuil de rapportage	Montréal(06)	Montréal (66 )	1	0	0	0	0	0	0	0	0	0	0	0	1
SPVM _ 2012 _ 10911	ME	2012/05/23	66023				AYLMER	1	STE CATHERINE	75	31		11	1	3		13		11	32		1			N	11	2	0	0	0	16:00:00-16:59:00	2012	0	Dommages matériels inférieurs au seuil de rapportage	Montréal(06)	Montréal (66 )	2	0	0	0	0	0	0	0	0	0	0	0	0
SPVM _ 2012 _ 10912	ME	2012/05/23	66023				ST JACQUES		DE LA CATHEDRALE	5	31		11	1	3		13		11	33		1			O	11	2	0	0	0	16:00:00-16:59:00	2012	0	Dommages matériels inférieurs au seuil de rapportage	Montréal(06)	Montréal (66 )	2	0	0	0	0	0	0	0	0	0	0	0	0
SPVM _ 2012 _ 10913	ME	2012/05/23	66032	1190			WILLIAM OPP	1	MURRAY				11	1	2		14		11	34		1				11	2	0	0	0	19:00:00-19:59:00	2012	0	Dommages matériels seulement	Montréal(06)	Montréal (66 )	1	0	0	0	0	0	0	0	0	0	0	0	1
SPVM _ 2012 _ 10914	ME	2012/05/23	66023				ST JACQUES	1	GAUVIN	20	31		11	1	3		13		11	32					E	11	2	0	0	0	08:00:00-08:59:00	2012	0	Dommages matériels seulement	Montréal(06)	Montréal (66 )	1	0	0	0	0	0	1	0	0	0	0	0	0
SPVM _ 2012 _ 10915	JE	2012/05/24	66023				PEEL ET WILLIAM				33		11	1	3		13		11	32		2				11	2	0	0	0	07:00:00-07:59:00	2012	0	Dommages matériels inférieurs au seuil de rapportage	Montréal(06)	Montréal (66 )	1	0	0	0	1	0	0	0	0	0	0	0	0
SPVM _ 2012 _ 10916	ME	2012/05/23	66023	1190			UNION	2	PRES DE		31		11	3	3		13		11	34		2				11	2	0	0	0	20:00:00-20:59:00	2012	0	Dommages matériels seulement	Montréal(06)	Montréal (66 )	0	0	0	0	0	0	1	0	0	0	0	0	1
SPVM _ 2012 _ 10917	JE	2012/05/24	66023					1	RENE LEVESQUE ET MONTAGNE	10	31		11	1	3		13		11	33		3			E	11	2	0	0	0	10:00:00-10:59:00	2012	0	Dommages matériels inférieurs au seuil de rapportage	Montréal(06)	Montréal (66 )	2	0	0	0	0	0	0	0	0	0	0	0	0
SPVM _ 2012 _ 10918	JE	2012/05/24	66023				ELEANOR				40		11	1	3		13		11	34		1				11	1	0	0	0	10:00:00-10:59:00	2012	0	Dommages matériels inférieurs au seuil de rapportage	Montréal(06)	Montréal (66 )	0	1	0	0	0	0	0	0	0	0	0	0	0
SPVM _ 2012 _ 10919	JE	2012/05/24	66023	355			STE CATHERINE O				31		11	1	3		21		11	99		9			N	11	2	0	0	0	09:00:00-09:59:00	2012	0	Dommages matériels seulement	Montréal(06)	Montréal (66 )	1	0	0	0	0	0	0	0	0	0	0	0	1
SPVM _ 2012 _ 1092	JE	2012/12/20	66142	3400			DU MARCHE	1	KESMARK	20	31		12	1	3		21		11	99					O	12	2	0	0	0	15:00:00-15:59:00	2012	0	Dommages matériels inférieurs au seuil de rapportage	Montréal(06)	Montréal (66 )	2	0	0	0	0	0	0	0	0	0	0	0	0
SPVM _ 2012 _ 10920	DI	2012/03/04	66023	687			DES PINS				31			1	3		22		11	99		2					2	0	0	0	Non précisé	2012	0	Dommages matériels inférieurs au seuil de rapportage	Montréal(06)	Montréal (66 )	1	0	0	0	0	0	0	0	0	0	0	0	1
SPVM _ 2012 _ 10921	JE	2012/05/24	66023				DE MAISONNEUVE O	1	UNION		33		11	1	3		13	1	11	32	6	1				11	2	0	0	1	17:00:00-17:59:00	2012	1	Léger	Montréal(06)	Montréal (66 )	1	0	0	0	1	0	0	0	0	0	0	0	0
SPVM _ 2012 _ 10922	JE	2012/05/17	66023				METCALFE	1	MAISONNEUVE	10	31		11	1	3		13		11	32		1			S	11	2	0	0	0	11:00:00-11:59:00	2012	0	Dommages matériels inférieurs au seuil de rapportage	Montréal(06)	Montréal (66 )	1	0	0	0	0	1	0	0	0	0	0	0	0
SPVM _ 2012 _ 10923	JE	2012/05/24	66023	651			MONTAGNE	1	ST JACQUES	5	31		11	3	2		14		11	33		2			S	11	2	0	0	0	21:00:00-21:59:00	2012	0	Dommages matériels inférieurs au seuil de rapportage	Montréal(06)	Montréal (66 )	2	0	0	0	0	0	0	0	0	0	0	0	0
SPVM _ 2012 _ 10924	VE	2012/05/25	66023					1	ANN ET WILLIAM		31		11	1	3		13		11	33		1				11	2	0	0	0	10:00:00-10:59:00	2012	0	Dommages matériels inférieurs au seuil de rapportage	Montréal(06)	Montréal (66 )	1	1	0	0	0	0	0	0	0	0	0	0	0
SPVM _ 2012 _ 10925	JE	2012/05/24	66023	1350			SHERBROOKE O STAT INT				31		11	1	3		21		11	99						99	2	0	0	0	17:00:00-17:59:00	2012	0	Dommages matériels inférieurs au seuil de rapportage	Montréal(06)	Montréal (66 )	2	0	0	0	0	0	0	0	0	0	0	0	0
SPVM _ 2012 _ 10926	VE	2012/05/25	66023	732			STE CATHERINE	2	MC GILL COLLEGE	100	31		11	1	3		13		11	34		1			O	11	2	0	0	0	15:00:00-15:59:00	2012	0	Dommages matériels inférieurs au seuil de rapportage	Montréal(06)	Montréal (66 )	1	0	0	0	0	1	0	0	0	0	0	0	0
SPVM _ 2012 _ 10927	MA	2012/05/22	66023				DE LA MONTAGNE	1	STE CATHERINE	30	31		11	1	3		16		11	33		9			N	11	2	0	0	0	16:00:00-16:59:00	2012	0	Dommages matériels inférieurs au seuil de rapportage	Montréal(06)	Montréal (66 )	2	0	0	0	0	0	0	0	0	0	0	0	0
SPVM _ 2012 _ 10928	VE	2012/05/25	66023	800			DE LA GAUCHETIERE O ARR						11	1	3		21		11	34						11	2	0	0	0	Non précisé	2012	0	Dommages matériels inférieurs au seuil de rapportage	Montréal(06)	Montréal (66 )	1	0	0	0	0	0	0	0	0	0	0	0	1
SPVM _ 2012 _ 10929	VE	2012/05/25	66023	840			DR PENFIELD AV				49		11	1	9		19		13	99		2				11	1	0	0	0	16:00:00-16:59:00	2012	0	Dommages matériels seulement	Montréal(06)	Montréal (66 )	1	0	0	0	0	0	0	0	0	0	0	0	0
SPVM _ 2012 _ 1093	ME	2012/12/19	66142	3811			ST JEAN				31			3	3		21			40							2	0	0	0	Non précisé	2012	0	Dommages matériels inférieurs au seuil de rapportage	Montréal(06)	Montréal (66 )	1	0	0	0	0	0	0	0	0	0	0	0	1
SPVM _ 2012 _ 10930	JE	2012/05/24	66023				WILLIAM	1	SHANNON	10	31		11	1	2		14		11	32		1				11	2	0	0	0	18:00:00-18:59:00	2012	0	Dommages matériels inférieurs au seuil de rapportage	Montréal(06)	Montréal (66 )	1	1	0	0	0	0	0	0	0	0	0	0	0
SPVM _ 2012 _ 10931	MA	2012/05/15	66023				CATCHART	1	SQARE PHILLIP		31												0				2	0	0	0	17:00:00-17:59:00	2012	0	Dommages matériels inférieurs au seuil de rapportage	Montréal(06)	Montréal (66 )	2	0	0	0	0	0	0	0	0	0	0	0	0
SPVM _ 2012 _ 10932	SA	2012/05/19	66023				STANLEY	1	STE CATHERINE		31			1			13		11	32		3					2	0	0	0	18:00:00-18:59:00	2012	0	Dommages matériels seulement	Montréal(06)	Montréal (66 )	1	0	0	0	0	0	0	0	0	0	0	0	1
SPVM _ 2012 _ 10933	SA	2012/05/26	66023	1227			MONTAGNE	1	STE CATHERINE	40	31		11	1	3		13		11	33		2				11	2	0	0	0	17:00:00-17:59:00	2012	0	Dommages matériels inférieurs au seuil de rapportage	Montréal(06)	Montréal (66 )	1	0	0	0	0	0	0	0	0	0	0	0	1
SPVM _ 2012 _ 10934	SA	2012/05/26	66023				LUCIEN L ALLIER	1	OVERDALE		31		11	2	2		14		13	32		1				11	3	0	0	0	21:00:00-21:59:00	2012	0	Dommages matériels seulement	Montréal(06)	Montréal (66 )	2	0	0	1	0	0	0	0	0	0	0	0	0
SPVM _ 2012 _ 10935	SA	2012/04/28	66023	50			DU VERGER																				2	0	0	0	03:00:00-03:59:00	2012	0	Dommages matériels seulement	Montréal(06)	Montréal (66 )	1	0	0	0	0	0	0	0	0	0	0	0	1
SPVM _ 2012 _ 10936	DI	2012/05/27	66023	1212			DES PINS O				31		11	1	2		21		11	99		9				11	2	0	0	0	15:00:00-15:59:00	2012	0	Dommages matériels inférieurs au seuil de rapportage	Montréal(06)	Montréal (66 )	2	0	0	0	0	0	0	0	0	0	0	0	0
SPVM _ 2012 _ 10937	DI	2012/05/27	66023				PRESIDENT KENNEDY	1	UNIVERSITY		33		11	1	3		13	1	11	32	6	2				11	2	0	0	1	19:00:00-19:59:00	2012	1	Léger	Montréal(06)	Montréal (66 )	1	0	0	0	1	0	0	0	0	0	0	0	0
SPVM _ 2012 _ 10938	VE	2012/05/25	66023				STE CATHERINE	1	GUY	10	33		11	2	3		13	1	11	33	6	1			E	11	2	0	0	1	21:00:00-21:59:00	2012	1	Léger	Montréal(06)	Montréal (66 )	1	0	0	0	1	0	0	0	0	0	0	0	0
SPVM _ 2012 _ 10939	LU	2012/05/28	66023				COTE STE CATHERINE	1	VICTORIA		32		11	1	2		13	1	11	32	6	3				12	1	0	0	1	13:00:00-13:59:00	2012	1	Léger	Montréal(06)	Montréal (66 )	1	0	0	0	0	0	0	0	0	0	0	0	0
SPVM _ 2012 _ 1094	SA	2012/12/22	66142	504			WESTMINSTER				31		16	2	3		14		11	34		2				11	2	0	0	0	Non précisé	2012	0	Dommages matériels inférieurs au seuil de rapportage	Montréal(06)	Montréal (66 )	1	0	0	0	0	0	0	0	0	0	0	0	1
SPVM _ 2012 _ 10940	LU	2012/05/28	66023					1	COTES DES NEIGES ET SEAFORTH	10	31		11	1	2		14		13	99		3			N	11	2	0	0	0	16:00:00-16:59:00	2012	0	Dommages matériels seulement	Montréal(06)	Montréal (66 )	1	0	0	0	0	0	0	0	1	0	0	0	0
SPVM _ 2012 _ 10941	LU	2012/05/28	66023					1	CYPRESS ET PEEL		32		11	1	3		19	1	11	32		2				11	1	0	0	1	02:00:00-02:59:00	2012	1	Léger	Montréal(06)	Montréal (66 )	1	0	0	0	0	0	0	0	0	0	0	0	0
SPVM _ 2012 _ 10942	MA	2012/05/29	66023				CITY CONCILORS	1	PRESIDENT KENNEDY		31		13	1	3		19		11	34		2			N	14	4	0	0	0	17:00:00-17:59:00	2012	0	Dommages matériels seulement	Montréal(06)	Montréal (66 )	3	0	0	0	0	0	0	0	0	0	0	0	1
SPVM _ 2012 _ 10943	MA	2012/05/29	66023				PEEL	1	CYPRESS		59		12	3	3		14		11	32		2				14	1	0	0	0	22:00:00-22:59:00	2012	0	Dommages matériels seulement	Montréal(06)	Montréal (66 )	1	0	0	0	0	0	0	0	0	0	0	0	0
SPVM _ 2012 _ 10944	ME	2012/05/30	66023						AYLMER ET MAYOR	10	31		11	1	3		13		11	33		1			S	11	2	0	0	0	10:00:00-10:59:00	2012	0	Dommages matériels seulement	Montréal(06)	Montréal (66 )	2	0	0	0	0	0	0	0	0	0	0	0	0
SPVM _ 2012 _ 10945	ME	2012/05/30	66023					1	RENE LEVESQUE ET UNIVERSITY		33		11	1	3		13		11	32		3				11	2	0	0	0	11:00:00-11:59:00	2012	0	Dommages matériels inférieurs au seuil de rapportage	Montréal(06)	Montréal (66 )	0	1	0	0	1	0	0	0	0	0	0	0	0
SPVM _ 2012 _ 10946	ME	2012/05/30	66023					1	CAMILLIEN HOUDE ET REMEMBRANCE				11	1	5		19		11	32		2				11	2	0	0	0	11:00:00-11:59:00	2012	0	Dommages matériels inférieurs au seuil de rapportage	Montréal(06)	Montréal (66 )	1	0	0	0	0	0	0	1	0	0	0	0	0
SPVM _ 2012 _ 10947	ME	2012/05/30	66023				OTTAWA	1	MONTAGNE		38		11	1	3		13		11	33		2	1			11	2	0	0	0	15:00:00-15:59:00	2012	0	Dommages matériels inférieurs au seuil de rapportage	Montréal(06)	Montréal (66 )	0	1	0	0	1	0	0	0	0	0	0	0	0
SPVM _ 2012 _ 10948	ME	2012/05/30	66023	2077			STANLEY	2	SHERBROOKE	70			11	1	3		13		11	33		1			S	11	3	0	0	0	15:00:00-15:59:00	2012	0	Dommages matériels seulement	Montréal(06)	Montréal (66 )	3	0	0	0	0	0	0	0	0	0	0	0	0
SPVM _ 2012 _ 10949	ME	2012/05/30	66023				SHERBROOKE O	1	PEEL	5			11	1	3		13		11	32		3			E	11	3	0	0	0	18:00:00-18:59:00	2012	0	Dommages matériels seulement	Montréal(06)	Montréal (66 )	2	0	0	0	0	0	0	1	0	0	0	0	0
SPVM _ 2012 _ 1095	SA	2012/12/22	66142	47			BD BRUNSWICK FACE						16	3	3		21		11	40						18	2	0	0	0	17:00:00-17:59:00	2012	0	Dommages matériels inférieurs au seuil de rapportage	Montréal(06)	Montréal (66 )	1	0	0	0	0	0	0	0	0	0	0	0	1
SPVM _ 2012 _ 10950	ME	2012/05/30	66023	4145			BLUERIDGE CRESCENT	1	COTE DES NEIGES	60	31		11	3	2		14		11						E	11	2	0	0	0	21:00:00-21:59:00	2012	0	Dommages matériels inférieurs au seuil de rapportage	Montréal(06)	Montréal (66 )	1	1	0	0	0	0	0	0	0	0	0	0	0
SPVM _ 2012 _ 10951	ME	2012/05/30	66023				STE CATHERINE		UNIVERSITY	10	31		11	2	3		13		11	33		1			O	11	2	0	0	0	18:00:00-18:59:00	2012	0	Dommages matériels inférieurs au seuil de rapportage	Montréal(06)	Montréal (66 )	1	0	0	0	0	1	0	0	0	0	0	0	0
SPVM _ 2012 _ 10952	JE	2012/05/31	66023				MAISONNEUVE	1	UNION		33		11	1	3		13	1	11	32	6	1				11	2	0	0	1	08:00:00-08:59:00	2012	1	Léger	Montréal(06)	Montréal (66 )	0	0	0	0	1	0	0	1	0	0	0	0	0
SPVM _ 2012 _ 10953	JE	2012/05/31	66023				RENE LEVESQUE	1	PEEL	20	31		11	1	3		15		11	33		3			O	11	2	0	0	0	09:00:00-09:59:00	2012	0	Dommages matériels inférieurs au seuil de rapportage	Montréal(06)	Montréal (66 )	1	0	0	0	0	0	0	1	0	0	0	0	0
SPVM _ 2012 _ 10954	JE	2012/05/31	66023				MC GILL COLLEGE	1	STE CATHERINE		31		11	1	3		13		11	32		1				11	2	0	0	0	12:00:00-12:59:00	2012	0	Dommages matériels inférieurs au seuil de rapportage	Montréal(06)	Montréal (66 )	2	0	0	0	0	0	0	0	0	0	0	0	0
SPVM _ 2012 _ 10955	ME	2012/05/30	66023					1	SHERBROOKE ET PEEL	10	31		11	1	3		13		11	33		3			E	11	2	0	0	0	17:00:00-17:59:00	2012	0	Dommages matériels seulement	Montréal(06)	Montréal (66 )	1	0	0	0	0	0	0	0	0	0	0	0	1
SPVM _ 2012 _ 10956	VE	2012/06/01	66023				N-D	1	GAUVIN		31		11	1	3		13	1	11	32	2	1				11	2	0	0	1	07:00:00-07:59:00	2012	1	Léger	Montréal(06)	Montréal (66 )	2	0	0	0	0	0	0	0	0	0	0	0	0
SPVM _ 2012 _ 10957	VE	2012/06/01	66023				UNION	1	RENE LEVESQUE		31																2	0	0	0	Non précisé	2012	0	Dommages matériels inférieurs au seuil de rapportage	Montréal(06)	Montréal (66 )	1	0	0	0	0	0	0	0	0	0	0	0	1
SPVM _ 2012 _ 10958	JE	2012/05/31	66023				DUKE	1	UNIVERSITY		31		11	1	3		11		11	32		1				12	2	0	0	0	15:00:00-15:59:00	2012	0	Dommages matériels inférieurs au seuil de rapportage	Montréal(06)	Montréal (66 )	1	1	0	0	0	0	0	0	0	0	0	0	0
SPVM _ 2012 _ 10959	VE	2012/06/01	66023	3457			COTE DES NEIGES	1	SHERBROOKE O	100	33		11	1	2		13	1	13	34	6	3			N	12	2	0	0	1	14:00:00-14:59:00	2012	1	Léger	Montréal(06)	Montréal (66 )	0	0	0	1	1	0	0	0	0	0	0	0	0
SPVM _ 2012 _ 1096	SA	2012/12/22	66142	203			MAUPASSANT				31		16	3	2		21		11	99		9				11	2	0	0	0	17:00:00-17:59:00	2012	0	Dommages matériels inférieurs au seuil de rapportage	Montréal(06)	Montréal (66 )	1	0	0	0	0	0	0	0	0	0	0	0	1
SPVM _ 2012 _ 10960	VE	2012/06/01	66023				SIR WILLIAM OSLER				31		11	1	1		14		13	34		2				12	2	0	0	0	13:00:00-13:59:00	2012	0	Dommages matériels inférieurs au seuil de rapportage	Montréal(06)	Montréal (66 )	2	0	0	0	0	0	0	0	0	0	0	0	0
SPVM _ 2012 _ 10961	JE	2012/05/31	66023	3500			DE LA MONTAGNE				31		11	2	2		14		13	32		2				11	2	0	0	0	Non précisé	2012	0	Dommages matériels inférieurs au seuil de rapportage	Montréal(06)	Montréal (66 )	1	0	0	0	0	0	0	0	0	0	0	0	1
SPVM _ 2012 _ 10962	VE	2012/06/01	66023						CATHEDRALE ET ST JACQUES		31		11	1	3		13		14	32		1	1			12	2	0	0	0	Non précisé	2012	0	Dommages matériels seulement	Montréal(06)	Montréal (66 )	1	0	1	0	0	0	0	0	0	0	0	0	0
SPVM _ 2012 _ 10963	VE	2012/06/01	66023				RENE LEVESQUE		UNIVERSITE		31		11	1	3		13		11	33		3				11	2	0	0	0	17:00:00-17:59:00	2012	0	Dommages matériels seulement	Montréal(06)	Montréal (66 )	1	0	0	1	0	0	0	0	0	0	0	0	0
SPVM _ 2012 _ 10964	DI	2012/06/03	66023				PEEL	1	N-D O	1	31		12	3	3		13	1	11	32	6	3			N	14	2	0	0	1	01:00:00-01:59:00	2012	1	Léger	Montréal(06)	Montréal (66 )	2	0	0	0	0	0	0	0	0	0	0	0	0
SPVM _ 2012 _ 10965	JE	2012/05/31	66023					1	SHERBROOKE ET COTE DES NEIGE		31						13										2	0	0	0	17:00:00-17:59:00	2012	0	Dommages matériels seulement	Montréal(06)	Montréal (66 )	2	0	0	0	0	0	0	0	0	0	0	0	0
SPVM _ 2012 _ 10966	DI	2012/06/03	66023				ST JACQUES	1	MONTAGNE		31		11	1	3		13		11	32		5				11	2	0	0	0	13:00:00-13:59:00	2012	0	Dommages matériels inférieurs au seuil de rapportage	Montréal(06)	Montréal (66 )	2	0	0	0	0	0	0	0	0	0	0	0	0
SPVM _ 2012 _ 10967	LU	2012/06/04	66023					1	DE LA MONTAGNE ET N-D O		31		12	1	3		13		11	33		2			S	14	2	0	0	0	08:00:00-08:59:00	2012	0	Dommages matériels seulement	Montréal(06)	Montréal (66 )	1	1	0	0	0	0	0	0	0	0	0	0	0
SPVM _ 2012 _ 10968	LU	2012/06/04	66023	625			PRESIDENT KENNEDY				31		11	1	3		13		11	34		3				11	2	0	0	0	12:00:00-12:59:00	2012	0	Dommages matériels seulement	Montréal(06)	Montréal (66 )	2	0	0	0	0	0	0	0	0	0	0	0	0
SPVM _ 2012 _ 10969	LU	2012/06/04	66023	1004			STE CATHERINE O				31		11	1	3		13		11	34		1				11	2	0	0	0	Non précisé	2012	0	Dommages matériels seulement	Montréal(06)	Montréal (66 )	1	0	0	0	0	0	0	0	0	0	0	0	1
SPVM _ 2012 _ 1097	DI	2012/12/23	66142				BD DES SOURCES	1	BRUNSWICK		31		16	3	3		13		11	32		3				11	2	0	0	0	03:00:00-03:59:00	2012	0	Dommages matériels seulement	Montréal(06)	Montréal (66 )	2	0	0	0	0	0	0	0	0	0	0	0	0
SPVM _ 2012 _ 10970	SA	2012/06/02	66023				DE LA MONTAGNE		RENE LEVESQUE		31		12	1	3		13		11	33		2				13	2	0	0	0	Non précisé	2012	0	Dommages matériels seulement	Montréal(06)	Montréal (66 )	1	0	0	0	0	0	0	0	0	0	0	0	1
SPVM _ 2012 _ 10971	MA	2012/05/22	66023	800			SQUARE VICTORIA				31		11	1	3		13		11	33		1				11	2	0	0	0	09:00:00-09:59:00	2012	0	Dommages matériels seulement	Montréal(06)	Montréal (66 )	1	0	0	0	0	0	0	0	0	0	0	0	1
SPVM _ 2012 _ 10972	LU	2012/06/04	66023				BEAVER HALL	1	BELMONT	10	31		11	1	3		13		11	33		2			N	11	2	0	0	0	15:00:00-15:59:00	2012	0	Dommages matériels seulement	Montréal(06)	Montréal (66 )	0	0	0	0	0	0	1	1	0	0	0	0	0
SPVM _ 2012 _ 10973	LU	2012/06/04	66023				N-D	1	GUY		31		11	1	3		13		11	33		2				11	2	0	0	0	09:00:00-09:59:00	2012	0	Dommages matériels seulement	Montréal(06)	Montréal (66 )	1	1	0	0	0	0	0	0	0	0	0	0	0
SPVM _ 2012 _ 10974	LU	2012/06/04	66023				DR PENFIELD AV	1	AV DES PINS	75	59		14	1	1		14	9	13	33	7	1			S	12	1	0	1	0	18:00:00-18:59:00	2012	1	Grave	Montréal(06)	Montréal (66 )	0	0	0	0	0	0	1	0	0	0	0	0	0
SPVM _ 2012 _ 10975	SA	2012/06/02	66023				SHERBROOKE	1	MCGILL COLLEGE	20	31		12	1	3		13		11	33		3	2		O	14	2	0	0	0	12:00:00-12:59:00	2012	0	Dommages matériels seulement	Montréal(06)	Montréal (66 )	1	0	0	1	0	0	0	0	0	0	0	0	0
SPVM _ 2012 _ 10976	SA	2012/06/02	66023				MAISONNEUVE O	1	CRESCENT		32		12	3	3		13	1	11	32	6	1			E	14	1	0	0	1	05:00:00-05:59:00	2012	1	Léger	Montréal(06)	Montréal (66 )	0	0	0	0	0	0	0	0	0	0	0	0	1
SPVM _ 2012 _ 10977	LU	2012/06/04	66023				UNIVERSITY	1	N-D O		31		11	3	3		13	1	11	32	6	3				12	2	0	0	3	23:00:00-23:59:00	2012	3	Léger	Montréal(06)	Montréal (66 )	2	0	0	0	0	0	0	0	0	0	0	0	0
SPVM _ 2012 _ 10978	MA	2012/06/05	66023				PEEL	1	DES PINS		31		11	1	2		14		13	32		2				11	2	0	0	0	09:00:00-09:59:00	2012	0	Dommages matériels inférieurs au seuil de rapportage	Montréal(06)	Montréal (66 )	2	0	0	0	0	0	0	0	0	0	0	0	0
SPVM _ 2012 _ 10979	MA	2012/06/05	66023				GUY	1	MAISONNEUVE		33		11	1	3		13		11	33		2				11	2	0	0	0	12:00:00-12:59:00	2012	0	Dommages matériels inférieurs au seuil de rapportage	Montréal(06)	Montréal (66 )	1	0	0	0	1	0	0	0	0	0	0	0	0
SPVM _ 2012 _ 1098	DI	2012/12/23	66142				WESTPARK		ANSELEME LAVIGNE		31		16	1	2		14		11	32		2				11	2	0	0	0	13:00:00-13:59:00	2012	0	Dommages matériels seulement	Montréal(06)	Montréal (66 )	2	0	0	0	0	0	0	0	0	0	0	0	0
SPVM _ 2012 _ 10980	LU	2012/06/04	66023				DE LA GAUCHETIERE	1	BEAVER HALL	20	31		11	1	3		14		11	33		1			O	11	2	0	0	0	14:00:00-14:59:00	2012	0	Dommages matériels seulement	Montréal(06)	Montréal (66 )	1	1	0	0	0	0	0	0	0	0	0	0	0
SPVM _ 2012 _ 10981	MA	2012/06/05	66023	1650			CEDAR	1	COTE DES JEUNES	500			11	1	3		13		11	34		2			E	11	2	0	0	0	14:00:00-14:59:00	2012	0	Dommages matériels seulement	Montréal(06)	Montréal (66 )	1	0	0	0	0	0	0	0	0	0	0	0	1
SPVM _ 2012 _ 10982	MA	2012/06/05	66023	1			PL VILLE MARIE				31		11	2	3		21		11	33		2				99	2	0	0	0	18:00:00-18:59:00	2012	0	Dommages matériels inférieurs au seuil de rapportage	Montréal(06)	Montréal (66 )	1	0	0	0	0	0	0	0	0	0	0	0	1
SPVM _ 2012 _ 10983	MA	2012/06/05	66023				RENE LEVESQUE	1	UNIVERSITY		31		12	2	3		13		11	32		3				12	2	0	0	0	17:00:00-17:59:00	2012	0	Dommages matériels inférieurs au seuil de rapportage	Montréal(06)	Montréal (66 )	2	0	0	0	0	0	0	0	0	0	0	0	0
SPVM _ 2012 _ 10984	ME	2012/06/06	66023				MURRAY	1	N-D O	20	31		11	1	3		13		11	33		1			S	11	2	0	0	0	09:00:00-09:59:00	2012	0	Dommages matériels inférieurs au seuil de rapportage	Montréal(06)	Montréal (66 )	1	0	0	0	0	0	0	0	0	0	0	0	1
SPVM _ 2012 _ 10985	MA	2012/06/05	66023	800			DE LA GAUCHETIERE				31		11		3		21		11								2	0	0	0	Non précisé	2012	0	Dommages matériels inférieurs au seuil de rapportage	Montréal(06)	Montréal (66 )	1	0	0	0	0	0	0	0	0	0	0	0	1
SPVM _ 2012 _ 10986	JE	2012/06/07	66023	3450			UNIVERSITY ARR				52		11	1	1		22		11	99		9				11	1	0	0	0	12:00:00-12:59:00	2012	0	Dommages matériels inférieurs au seuil de rapportage	Montréal(06)	Montréal (66 )	1	0	0	0	0	0	0	0	0	0	0	0	0
SPVM _ 2012 _ 10987	ME	2012/06/06	66023					1	PEEL ET WILLIAM		31		11	3	2		13									12	2	0	0	0	21:00:00-21:59:00	2012	0	Dommages matériels seulement	Montréal(06)	Montréal (66 )	2	0	0	0	0	0	0	0	0	0	0	0	0
SPVM _ 2012 _ 10988	VE	2012/06/08	66023				PRESIDENT KENNEDY	1	VICTORIA		40		11	1	3		13	1	11	32	6	3			N	11	1	0	0	1	07:00:00-07:59:00	2012	1	Léger	Montréal(06)	Montréal (66 )	1	0	0	0	0	0	0	0	0	0	0	0	0
SPVM _ 2012 _ 10989	VE	2012/06/08	66023				DES PINS O ET DU DR PENFIELD						11	3	2		14		13	32						11	2	0	0	0	04:00:00-04:59:00	2012	0	Dommages matériels seulement	Montréal(06)	Montréal (66 )	2	0	0	0	0	0	0	0	0	0	0	0	0
SPVM _ 2012 _ 1099	LU	2012/12/24	66142	498			WESTMINSTER				38		16	3	2		22		11	33		2					1	0	0	0	Non précisé	2012	0	Dommages matériels inférieurs au seuil de rapportage	Montréal(06)	Montréal (66 )	1	0	0	0	0	0	0	0	0	0	0	0	0
SPVM _ 2012 _ 10990	JE	2012/06/07	66023					1	STANLEY ET MAISONNEUVE	50	31		11	2	3		13		11	33		1			N	11	2	0	0	0	20:00:00-20:59:00	2012	0	Dommages matériels inférieurs au seuil de rapportage	Montréal(06)	Montréal (66 )	1	0	0	0	0	0	0	0	1	0	0	0	0
SPVM _ 2012 _ 10991	VE	2012/06/08	66023				PEEL	1	MAISONNEUVE		31		11	1	3		13	1	11	32	6	3			N	11	2	0	0	1	10:00:00-10:59:00	2012	1	Léger	Montréal(06)	Montréal (66 )	2	0	0	0	0	0	0	0	0	0	0	0	0
SPVM _ 2012 _ 10992	VE	2012/06/08	66023				UNIVERSITY	1	PRESIDENT KENNEDY		31		11	1	3		14		11	32		1				11	2	0	0	0	10:00:00-10:59:00	2012	0	Dommages matériels seulement	Montréal(06)	Montréal (66 )	1	0	0	0	0	0	0	0	1	0	0	0	0
SPVM _ 2012 _ 10993	VE	2012/06/08	66023				N-D O		PEEL		31		11	3	3		13		11	32		3				11	2	0	0	0	03:00:00-03:59:00	2012	0	Dommages matériels inférieurs au seuil de rapportage	Montréal(06)	Montréal (66 )	1	0	0	0	0	0	0	0	0	0	0	0	1
SPVM _ 2012 _ 10994	VE	2012/06/08	66023				METCALFE	1	MAISONNEUVE O		33		11	1	3		19	1	11	34	5	1			S	12	2	0	0	1	14:00:00-14:59:00	2012	1	Léger	Montréal(06)	Montréal (66 )	1	0	0	0	1	0	0	0	0	0	0	0	0
SPVM _ 2012 _ 10995	VE	2012/06/08	66023				PRESIDENT KENNEDY	1	MCGILL COLLEGE	20	31		11	1	3		13		11	33		3			E	12	2	0	0	0	15:00:00-15:59:00	2012	0	Dommages matériels seulement	Montréal(06)	Montréal (66 )	2	0	0	0	0	0	0	0	0	0	0	0	0
SPVM _ 2012 _ 10996	VE	2012/06/08	66023				PEEL	1	ST JACQUES		31		11	2	3		13	1	11	32		1				14	2	0	0	1	15:00:00-15:59:00	2012	1	Léger	Montréal(06)	Montréal (66 )	1	0	0	0	0	0	0	0	1	0	0	0	0
SPVM _ 2012 _ 10997	ME	2012/05/23	66023	687			DES PINS O				31			1	3		21		11	99							2	0	0	0	Non précisé	2012	0	Dommages matériels inférieurs au seuil de rapportage	Montréal(06)	Montréal (66 )	1	0	0	0	0	0	0	0	0	0	0	0	1
SPVM _ 2012 _ 10998	VE	2012/06/08	66023				RENE LEVESQUE	2	MANSFIELD	30	31		11	3	3		13		11	33		5			O	11	2	0	0	0	22:00:00-22:59:00	2012	0	Dommages matériels inférieurs au seuil de rapportage	Montréal(06)	Montréal (66 )	1	0	0	0	0	0	0	0	1	0	0	0	0
SPVM _ 2012 _ 10999	SA	2012/06/09	66023				PEEL	1	GAUCHETIERE	10	59	9	11	1	3		13		13	33		1			S	11	1	0	0	0	10:00:00-10:59:00	2012	0	Dommages matériels inférieurs au seuil de rapportage	Montréal(06)	Montréal (66 )	1	0	0	0	0	0	0	0	0	0	0	0	0
SPVM _ 2012 _ 11	JE	2012/01/05	66023	15200			PIERREFONDS						11	1	3		21		11	99						11	2	0	0	0	10:00:00-10:59:00	2012	0	Dommages matériels inférieurs au seuil de rapportage	Montréal(06)	Montréal (66 )	1	0	0	0	0	0	0	0	0	0	0	0	1
SPVM _ 2012 _ 110	MA	2012/02/28	66023				BD PIERREFONDS	1	ST PIERRE		31		12	3	3		14		11	32		3				12	2	0	0	0	18:00:00-18:59:00	2012	0	Dommages matériels seulement	Montréal(06)	Montréal (66 )	2	0	0	0	0	0	0	0	0	0	0	0	0
SPVM _ 2012 _ 1100	LU	2012/12/24	66142	4230			BD ST JEAN				31		16	3	2		21		11	40		9				17	2	0	0	0	11:00:00-11:59:00	2012	0	Dommages matériels inférieurs au seuil de rapportage	Montréal(06)	Montréal (66 )	2	0	0	0	0	0	0	0	0	0	0	0	0
SPVM _ 2012 _ 11000	SA	2012/06/02	66023	1500			MCGILL COLLEGE				31						21										2	0	0	0	Non précisé	2012	0	Dommages matériels seulement	Montréal(06)	Montréal (66 )	2	0	0	0	0	0	0	0	0	0	0	0	0
SPVM _ 2012 _ 11001	SA	2012/06/09	66023				BEAVER HALL	1	BELMONT		32	9	11	3	3		19	1	13	32	6	3				11	2	0	0	3	09:00:00-09:59:00	2012	3	Léger	Montréal(06)	Montréal (66 )	0	0	0	0	1	0	0	1	0	0	0	0	0
SPVM _ 2012 _ 11002	DI	2012/06/10	66023					1	DR PENFIELD ET DU MUSEE		31	1	11	3	2		13		12	32		1				11	2	0	0	0	03:00:00-03:59:00	2012	0	Dommages matériels seulement	Montréal(06)	Montréal (66 )	1	0	0	0	0	0	0	1	0	0	0	0	0
SPVM _ 2012 _ 11003	DI	2012/06/10	66023	2100			CAMILIEN HOUDE				31		11	3	7		19		13	99		9				12	2	0	0	0	Non précisé	2012	0	Dommages matériels inférieurs au seuil de rapportage	Montréal(06)	Montréal (66 )	2	0	0	0	0	0	0	0	0	0	0	0	0
SPVM _ 2012 _ 11004	DI	2012/06/10	66023							5	31		11	1	3		14		13	33		2			N	11	2	0	0	0	15:00:00-15:59:00	2012	0	Dommages matériels inférieurs au seuil de rapportage	Montréal(06)	Montréal (66 )	1	0	0	0	0	0	0	0	1	0	0	0	0
SPVM _ 2012 _ 11005	JE	2012/06/07	66023				MANSFIELD	1	RENE LEVESQUE		31		11	1	3		13		11	32		3			N	11	2	0	0	0	12:00:00-12:59:00	2012	0	Dommages matériels seulement	Montréal(06)	Montréal (66 )	1	0	0	0	0	0	0	0	0	0	0	0	1
SPVM _ 2012 _ 11006	DI	2012/06/10	66023					1	MCGILL ET WELLINGTON		99		11	2	3		13		11	33		2				11	2	0	0	1	20:00:00-20:59:00	2012	1	Léger	Montréal(06)	Montréal (66 )	1	0	0	0	0	1	0	0	0	0	0	0	0
SPVM _ 2012 _ 11007	DI	2012/06/10	66023	2100			DRUMMOND		SHERBROOKE	25			11	2	3		14		11			1			S	11	2	0	0	0	17:00:00-17:59:00	2012	0	Dommages matériels seulement	Montréal(06)	Montréal (66 )	1	0	0	0	0	0	0	0	0	0	0	0	1
SPVM _ 2012 _ 11008	LU	2012/06/11	66023	456					DOCTEUR PENFIELD		33		11	4	1		13	4	22		7	1				11	2	0	0	1	02:00:00-02:59:00	2012	1	Léger	Montréal(06)	Montréal (66 )	1	0	0	0	1	0	0	0	0	0	0	0	0
SPVM _ 2012 _ 11009	LU	2012/06/11	66023	1196			CAMILIEN HOUDE	2	BELVEDRE DU MT ROYAL		31		11	3	6		19		13	99		9				11	4	0	0	0	01:00:00-01:59:00	2012	0	Dommages matériels seulement	Montréal(06)	Montréal (66 )	3	0	0	0	0	0	0	0	0	0	0	0	1
SPVM _ 2012 _ 1101	VE	2012/12/21	66142	65			SUNSHINE				31			1	1		21										2	0	0	0	15:00:00-15:59:00	2012	0	Dommages matériels seulement	Montréal(06)	Montréal (66 )	1	0	0	0	0	0	0	0	0	0	0	0	1
SPVM _ 2012 _ 11010	LU	2012/06/11	66023				ST ANTOINE	1	MANSFIELD		31		11	1	3		13		11	32		3			S	11	2	0	0	0	10:00:00-10:59:00	2012	0	Dommages matériels seulement	Montréal(06)	Montréal (66 )	0	0	0	0	0	0	0	1	1	0	0	0	0
SPVM _ 2012 _ 11011	ME	2012/04/11	66023				N-D O	1	GUY		31		11	1	3		13			32		2			O	11	2	0	0	0	16:00:00-16:59:00	2012	0	Dommages matériels inférieurs au seuil de rapportage	Montréal(06)	Montréal (66 )	1	0	0	0	0	0	0	0	0	0	0	0	1
SPVM _ 2012 _ 11012	LU	2012/06/11	66023				DE LA MONTAGNE	1	SHERBROOKE O	10	31		11	1	2		14		13	33		2	1			11	2	0	0	0	10:00:00-10:59:00	2012	0	Dommages matériels inférieurs au seuil de rapportage	Montréal(06)	Montréal (66 )	1	1	0	0	0	0	0	0	0	0	0	0	0
SPVM _ 2012 _ 11013	SA	2012/06/09	66023	3470			REDPATH				31		11	1	2		12		13	32		1			N	11	2	0	0	0	19:00:00-19:59:00	2012	0	Dommages matériels inférieurs au seuil de rapportage	Montréal(06)	Montréal (66 )	2	0	0	0	0	0	0	0	0	0	0	0	0
SPVM _ 2012 _ 11014	DI	2012/06/10	66023				AYLMER	1	STE CATHERINE		31		11	1	2		14		11			2				11	2	0	0	0	12:00:00-12:59:00	2012	0	Dommages matériels inférieurs au seuil de rapportage	Montréal(06)	Montréal (66 )	1	0	0	0	0	0	0	0	0	0	0	0	1
SPVM _ 2012 _ 11015	LU	2012/06/11	66023	1733			CEDAR	1	COTE DES NEIGES	100	31		11	1	9		13		12	34		2			E	11	3	0	0	0	15:00:00-15:59:00	2012	0	Dommages matériels seulement	Montréal(06)	Montréal (66 )	3	0	0	0	0	0	0	0	0	0	0	0	0
SPVM _ 2012 _ 11016	JE	2012/06/07	66023				MAISONNEUVE		MCGILL		31			1	3		13		11	34		1			N	11	2	0	0	0	Non précisé	2012	0	Dommages matériels inférieurs au seuil de rapportage	Montréal(06)	Montréal (66 )	1	0	0	0	0	0	0	0	0	0	0	0	1
SPVM _ 2012 _ 11017	DI	2012/06/10	66023						950 N-D O OPP		31		11	3	2		13		11	32		3				11	2	0	0	0	22:00:00-22:59:00	2012	0	Dommages matériels inférieurs au seuil de rapportage	Montréal(06)	Montréal (66 )	1	0	0	0	0	0	0	0	0	0	0	0	1
SPVM _ 2012 _ 11018	MA	2012/06/12	66023	1204			CRESCENT				31		11	1	3		21		11							11	2	0	0	0	09:00:00-09:59:00	2012	0	Dommages matériels seulement	Montréal(06)	Montréal (66 )	2	0	0	0	0	0	0	0	0	0	0	0	0
SPVM _ 2012 _ 11019	MA	2012/06/12	66023				RENE LEVESQUE	1	UNIVERSITE		31		11	1	3		13		11	32		5				11	2	0	0	0	12:00:00-12:59:00	2012	0	Dommages matériels inférieurs au seuil de rapportage	Montréal(06)	Montréal (66 )	2	0	0	0	0	0	0	0	0	0	0	0	0
SPVM _ 2012 _ 1102	MA	2012/12/18	66023								31		99		3		21			40						99	2	0	0	0	00:00:00-00:59:00	2012	0	Dommages matériels inférieurs au seuil de rapportage	Montréal(06)	Montréal (66 )	1	0	0	0	0	0	0	0	0	0	0	0	1
SPVM _ 2012 _ 11020	SA	2012/06/09	66023				DE LA GAUCHETIERE		MANSFIELD		31		11	2	3		14		11	32		3				11	2	0	0	0	19:00:00-19:59:00	2012	0	Dommages matériels inférieurs au seuil de rapportage	Montréal(06)	Montréal (66 )	1	0	0	0	0	0	1	0	0	0	0	0	0
SPVM _ 2012 _ 11021	MA	2012/06/12	66023					1	PEEL ET RENE LEVESQUE		31		12	3	3		13		11	32		3				14	2	0	0	0	20:00:00-20:59:00	2012	0	Dommages matériels seulement	Montréal(06)	Montréal (66 )	2	0	0	0	0	0	0	0	0	0	0	0	0
SPVM _ 2012 _ 11022	ME	2012/06/13	66023				DR PENFIELD	1	COTE DES NEIGES		31		11	1	3		19	1	13	34	6	1				11	3	0	0	0	06:00:00-06:59:00	2012	0	Dommages matériels seulement	Montréal(06)	Montréal (66 )	3	0	0	0	0	0	0	0	0	0	0	0	0
SPVM _ 2012 _ 11023	ME	2012/06/13	66023				UNIVERSITY	1	RENE LEVESQUE O				11	1	3		13		11	32		2				12	2	0	0	0	08:00:00-08:59:00	2012	0	Dommages matériels inférieurs au seuil de rapportage	Montréal(06)	Montréal (66 )	2	0	0	0	0	0	0	0	0	0	0	0	0
SPVM _ 2012 _ 11024	JE	2012/06/14	66023					1	ST ALEXANDRE ET RENE LEVESQUE		31		11	3	3		13		11	32		1				11	2	0	0	0	21:00:00-21:59:00	2012	0	Dommages matériels inférieurs au seuil de rapportage	Montréal(06)	Montréal (66 )	1	0	0	0	0	0	0	0	0	0	0	0	1
SPVM _ 2012 _ 11025	JE	2012/06/14	66023	1414			N-D				33		11	1	3		14		11	34		2				11	2	0	0	0	08:00:00-08:59:00	2012	0	Dommages matériels inférieurs au seuil de rapportage	Montréal(06)	Montréal (66 )	1	0	0	0	1	0	0	0	0	0	0	0	0
SPVM _ 2012 _ 11026	ME	2012/06/13	66023	1			PL VILLE MARIE	1	BELMONT ET UNIVERSITY				11		3		21		11								2	0	0	0	05:00:00-05:59:00	2012	0	Dommages matériels inférieurs au seuil de rapportage	Montréal(06)	Montréal (66 )	1	0	0	0	0	0	0	0	0	0	0	0	1
SPVM _ 2012 _ 11027	ME	2012/06/13	66023				MAISONNEUVE	1	UNION		33		11	1	3		14	1	11	32	5	1			O	11	2	0	0	1	17:00:00-17:59:00	2012	1	Léger	Montréal(06)	Montréal (66 )	1	0	0	0	1	0	0	0	0	0	0	0	0
SPVM _ 2012 _ 11028	JE	2012/06/14	66023				RENE LEVESQUE	1	GUY		31		11	1	3		13		11	32		3			N	11	2	0	0	0	14:00:00-14:59:00	2012	0	Dommages matériels seulement	Montréal(06)	Montréal (66 )	2	0	0	0	0	0	0	0	0	0	0	0	0
SPVM _ 2012 _ 11029	JE	2012/06/14	66023	1100			SHERBROOKE O	2	HOTEL CANTLIE		31		11	1	3		21		13	99		2				11	2	0	0	0	14:00:00-14:59:00	2012	0	Dommages matériels inférieurs au seuil de rapportage	Montréal(06)	Montréal (66 )	2	0	0	0	0	0	0	0	0	0	0	0	0
SPVM _ 2012 _ 1103	LU	2012/12/24	66023				TERRITOIRE DE MTL				31		17		3		21									12	2	0	0	0	Non précisé	2012	0	Dommages matériels inférieurs au seuil de rapportage	Montréal(06)	Montréal (66 )	1	0	1	0	0	0	0	0	0	0	0	0	0
SPVM _ 2012 _ 11030	JE	2012/06/14	66023	420			SHERBROOKE	1			31		11	3	3		13		11	32		3				11	2	0	0	0	22:00:00-22:59:00	2012	0	Dommages matériels seulement	Montréal(06)	Montréal (66 )	0	0	0	0	0	0	0	1	1	0	0	0	0
SPVM _ 2012 _ 11031	JE	2012/06/14	66023					1	WELLINGTON ET NAZARETH	5	31		11		3				11	32		1				11	2	0	0	0	16:00:00-16:59:00	2012	0	Dommages matériels seulement	Montréal(06)	Montréal (66 )	2	0	0	0	0	0	0	0	0	0	0	0	0
SPVM _ 2012 _ 11032	JE	2012/06/14	66023				N-D	1	DE L INSPECTEUR	15	31		11	2	3		13		11	34		1			E	11	2	0	0	0	19:00:00-19:59:00	2012	0	Dommages matériels seulement	Montréal(06)	Montréal (66 )	1	0	0	0	0	0	0	0	0	0	0	0	1
SPVM _ 2012 _ 11033	JE	2012/06/14	66023				BISHOP	1	MAISONNEUVE		31		11	1	3		13		11	32		3				11	2	0	0	0	12:00:00-12:59:00	2012	0	Dommages matériels inférieurs au seuil de rapportage	Montréal(06)	Montréal (66 )	1	1	0	0	0	0	0	0	0	0	0	0	0
SPVM _ 2012 _ 11034	VE	2012/06/15	66023				CATHEDRALE	1	DE LA GAUCHETIERE	2	75		11	1	3		13		13	32		1				11	2	0	0	0	15:00:00-15:59:00	2012	0	Dommages matériels inférieurs au seuil de rapportage	Montréal(06)	Montréal (66 )	1	0	0	0	0	0	0	0	0	0	0	0	1
SPVM _ 2012 _ 11035	VE	2012/06/15	66023	1425			DE LA MONTAGNE				31		11	1	3		21		11							11	2	0	0	0	12:00:00-12:59:00	2012	0	Dommages matériels seulement	Montréal(06)	Montréal (66 )	1	0	0	0	0	0	0	0	0	0	0	0	1
SPVM _ 2012 _ 11036	LU	2012/06/11	66023				UNIVERSITY		RENE LEVESQUE		31		11	1	3		13		13	33		3				11	2	0	0	0	08:00:00-08:59:00	2012	0	Dommages matériels inférieurs au seuil de rapportage	Montréal(06)	Montréal (66 )	1	0	0	0	0	0	0	0	0	0	0	0	1
SPVM _ 2012 _ 11037	DI	2012/06/17	66023	2100			CAMILIEN HOUDE				75		11	1	7		13	1	23	99	10	3				11	1	0	0	1	06:00:00-06:59:00	2012	1	Léger	Montréal(06)	Montréal (66 )	1	0	0	0	0	0	0	0	0	0	0	0	0
SPVM _ 2012 _ 11038	ME	2012/06/13	66023				RENE LEVESQUE ET PEEL						11	1	3		13		11	33		3				11	2	0	0	0	13:00:00-13:59:00	2012	0	Dommages matériels inférieurs au seuil de rapportage	Montréal(06)	Montréal (66 )	2	0	0	0	0	0	0	0	0	0	0	0	0
SPVM _ 2012 _ 11039	DI	2012/06/17	66023				COTE DES NEIGES	1	REMEMBRANCE		31		11	1	2		13	1	13	32	6	2				11	2	0	0	2	14:00:00-14:59:00	2012	2	Léger	Montréal(06)	Montréal (66 )	2	0	0	0	0	0	0	0	0	0	0	0	0
SPVM _ 2012 _ 1104	LU	2012/12/24	66142	190			DAVIGNON CH				31		11	2	2		14		11	33		2				11	2	0	0	0	18:00:00-18:59:00	2012	0	Dommages matériels inférieurs au seuil de rapportage	Montréal(06)	Montréal (66 )	1	0	0	0	0	0	0	0	0	0	0	0	1
SPVM _ 2012 _ 11040	DI	2012/06/17	66023	3421	P		PEEL				31		11	3	2		14		13	34		2				11	2	0	0	0	04:00:00-04:59:00	2012	0	Dommages matériels seulement	Montréal(06)	Montréal (66 )	0	0	0	0	0	0	1	0	0	0	0	0	1
SPVM _ 2012 _ 11041	LU	2012/06/18	66023	1237			GUY A L ARR			50	32		11	4	3		16	5	11	99	10	1			E	12	1	0	1	0	02:00:00-02:59:00	2012	1	Grave	Montréal(06)	Montréal (66 )	0	1	0	0	0	0	0	0	0	0	0	0	0
SPVM _ 2012 _ 11042	VE	2012/06/15	66023						COTE DES NEIGES ET DR PENFIELD	5	31		11	1	2		13	1	13	34	6	3			S	11	2	0	0	0	10:00:00-10:59:00	2012	0	Dommages matériels inférieurs au seuil de rapportage	Montréal(06)	Montréal (66 )	2	0	0	0	0	0	0	0	0	0	0	0	0
SPVM _ 2012 _ 11043	LU	2012/06/18	66023				PEEL	1	N-D		31		11	1	3		19	1	11	34	6	3			N	11	2	0	0	0	16:00:00-16:59:00	2012	0	Dommages matériels seulement	Montréal(06)	Montréal (66 )	2	0	0	0	0	0	0	0	0	0	0	0	0
SPVM _ 2012 _ 11044	DI	2012/06/17	66023	1200			ST ALEXANDRE				31		11	3	2		12		11	99		1				11	2	0	0	0	22:00:00-22:59:00	2012	0	Dommages matériels inférieurs au seuil de rapportage	Montréal(06)	Montréal (66 )	1	0	0	0	0	0	0	0	0	0	0	1	0
SPVM _ 2012 _ 11045	VE	2012/06/15	66023					1	MACKAY ET STE CATHERINE		31		11	3	3		13		11			1				11	2	0	0	0	Non précisé	2012	0	Dommages matériels seulement	Montréal(06)	Montréal (66 )	1	0	0	0	0	0	0	0	0	0	0	0	1
SPVM _ 2012 _ 11046	LU	2012/06/18	66023				REDPATH	1	SHERBROOKE O	100	31				2		16								N		2	0	0	0	06:00:00-06:59:00	2012	0	Dommages matériels inférieurs au seuil de rapportage	Montréal(06)	Montréal (66 )	1	0	0	0	0	0	0	0	0	0	0	0	1
SPVM _ 2012 _ 11047	ME	2012/06/20	66023				N-D	1	PEEL		31		11	1	3		13	1	11	33	6	3				11	2	0	0	0	07:00:00-07:59:00	2012	0	Dommages matériels seulement	Montréal(06)	Montréal (66 )	2	0	0	0	0	0	0	0	0	0	0	0	0
SPVM _ 2012 _ 11048	ME	2012/06/20	66023	1100			UNIVERSITY	1	RENE LEVESQUE	25	31		11	1	3		13		13	34		5				11	2	0	0	0	08:00:00-08:59:00	2012	0	Dommages matériels inférieurs au seuil de rapportage	Montréal(06)	Montréal (66 )	2	0	0	0	0	0	0	0	0	0	0	0	0
SPVM _ 2012 _ 11049	ME	2012/06/20	66023				PEEL	1	ST JACQUES	6	31		11	1	3		13		11	33		3			N	11	2	0	0	0	09:00:00-09:59:00	2012	0	Dommages matériels inférieurs au seuil de rapportage	Montréal(06)	Montréal (66 )	2	0	0	0	0	0	0	0	0	0	0	0	0
SPVM _ 2012 _ 1105	ME	2012/12/26	66142	343			BD DES SOURCES				31			1	3		21		11	40						12	2	0	0	0	13:00:00-13:59:00	2012	0	Dommages matériels inférieurs au seuil de rapportage	Montréal(06)	Montréal (66 )	2	0	0	0	0	0	0	0	0	0	0	0	0
SPVM _ 2012 _ 11050	ME	2012/06/20	66023				MCTAVISH	2	DR PENFIELD		31				1		13		12	34		1					2	0	0	0	Non précisé	2012	0	Dommages matériels inférieurs au seuil de rapportage	Montréal(06)	Montréal (66 )	1	0	0	0	0	0	0	0	0	0	0	0	1
SPVM _ 2012 _ 11051	ME	2012/06/20	66023				SHERBROOKE	1	CRESCENT	10	31		11	1	3		13		11	34		3			E	11	2	0	0	0	12:00:00-12:59:00	2012	0	Dommages matériels seulement	Montréal(06)	Montréal (66 )	1	0	0	0	0	0	0	0	0	0	0	0	1
SPVM _ 2012 _ 11052	ME	2012/06/20	66023	1600			REMEMBRANCE	1	COTE DES NEIGES	200	99		11	1	7		13	1	11	34	6	2			E	11	1	0	0	1	14:00:00-14:59:00	2012	1	Léger	Montréal(06)	Montréal (66 )	0	0	0	1	0	0	0	0	0	0	0	0	0
SPVM _ 2012 _ 11053	VE	2012/05/18	66023				STE CATHERINE	1	CRESCENT	80	31		11	3	3		13		11	34		1			E	11	2	0	0	0	23:00:00-23:59:00	2012	0	Dommages matériels seulement	Montréal(06)	Montréal (66 )	2	0	0	0	0	0	0	0	0	0	0	0	0
SPVM _ 2012 _ 11054	ME	2012/06/20	66023				DE LA MONTAGNE	1	RENE LEVESQUE O		33		11	1	3		19		11	32		3			N	11	2	0	0	0	17:00:00-17:59:00	2012	0	Dommages matériels inférieurs au seuil de rapportage	Montréal(06)	Montréal (66 )	0	0	0	0	1	0	0	1	0	0	0	0	0
SPVM _ 2012 _ 11055	JE	2012/06/21	66023	1200			MCKAY			20	31		11	1	3		21		11						O	11	2	0	0	0	08:00:00-08:59:00	2012	0	Dommages matériels inférieurs au seuil de rapportage	Montréal(06)	Montréal (66 )	1	1	0	0	0	0	0	0	0	0	0	0	0
SPVM _ 2012 _ 11056	JE	2012/06/21	66023				AYLMER	1	PRESIDENT KENNEDY		31		11	1	3		13		11	32		1				11	2	0	0	0	11:00:00-11:59:00	2012	0	Dommages matériels inférieurs au seuil de rapportage	Montréal(06)	Montréal (66 )	1	1	0	0	0	0	0	0	0	0	0	0	0
SPVM _ 2012 _ 11057	MA	2012/06/19	66023	3420			UNIVERSITY				31		11	1	1		14		11	34					N	11	2	0	0	0	11:00:00-11:59:00	2012	0	Dommages matériels inférieurs au seuil de rapportage	Montréal(06)	Montréal (66 )	1	0	0	0	0	0	0	0	0	0	0	0	1
SPVM _ 2012 _ 11058	JE	2012/06/21	66023				METCALFE	1	RENE LEVESQUE	10	31		11	1	3		13		11	33		1			S	11	2	0	0	0	16:00:00-16:59:00	2012	0	Dommages matériels inférieurs au seuil de rapportage	Montréal(06)	Montréal (66 )	2	0	0	0	0	0	0	0	0	0	0	0	0
SPVM _ 2012 _ 11059	JE	2012/06/21	66023	1420			PEEL		STE CATHERINE O	20	31		11	1	3		16		21	99		9				11	2	0	0	0	20:00:00-20:59:00	2012	0	Dommages matériels inférieurs au seuil de rapportage	Montréal(06)	Montréal (66 )	1	0	0	0	0	0	0	0	1	0	0	0	0
SPVM _ 2012 _ 1106	ME	2012/12/26	66023				TERRITOIRE DE MTL				31																2	0	0	0	Non précisé	2012	0	Dommages matériels inférieurs au seuil de rapportage	Montréal(06)	Montréal (66 )	1	0	0	0	0	0	0	0	0	0	0	0	1
SPVM _ 2012 _ 11060	JE	2012/06/21	66023				PEEL	1	MAISONNEUVE		31		11		3		13		11	33		2				11	2	0	0	0	18:00:00-18:59:00	2012	0	Dommages matériels seulement	Montréal(06)	Montréal (66 )	1	0	0	0	0	0	0	0	0	0	0	1	0
SPVM _ 2012 _ 11061	JE	2012/06/21	66023				STE CATHERINE		METCALFE				11	1	2		14		11	32		2				11	2	0	0	0	Non précisé	2012	0	Dommages matériels inférieurs au seuil de rapportage	Montréal(06)	Montréal (66 )	1	0	0	0	0	0	0	0	0	0	0	0	1
SPVM _ 2012 _ 11062	VE	2012/06/22	66023				SHERBROOKE		MANSFIELD		31		11	3	3		13		11	32		3				11	2	0	0	0	00:00:00-00:59:00	2012	0	Dommages matériels seulement	Montréal(06)	Montréal (66 )	2	0	0	0	0	0	0	0	0	0	0	0	0
SPVM _ 2012 _ 11063	VE	2012/06/22	66023				LUCIEN L ALLIER	1	ST ANTOINE		31	1	11	3	3		13	1	14	32	6	1				11	2	0	0	0	01:00:00-01:59:00	2012	0	Dommages matériels seulement	Montréal(06)	Montréal (66 )	2	0	0	0	0	0	0	0	0	0	0	0	0
SPVM _ 2012 _ 11064	ME	2012/06/20	66023																								2	0	0	0	12:00:00-12:59:00	2012	0	Dommages matériels inférieurs au seuil de rapportage	Montréal(06)	Montréal (66 )	1	0	0	0	0	0	0	0	0	0	0	0	1
SPVM _ 2012 _ 11065	VE	2012/06/22	66023				CH REMEMBRANCE	1	CH COTE DES NEIGES	50	31		11	1	2		15	5	24	33	6	1			E	11	2	0	0	1	16:00:00-16:59:00	2012	1	Léger	Montréal(06)	Montréal (66 )	1	0	0	0	0	0	1	0	0	0	0	0	0
SPVM _ 2012 _ 11066	ME	2012/06/20	66023				CRESCENT		DE MAISONNEUVE		31		11	2	3		13		11	33		1				11	2	0	0	0	Non précisé	2012	0	Dommages matériels seulement	Montréal(06)	Montréal (66 )	1	0	0	0	0	0	0	0	0	0	0	0	1
SPVM _ 2012 _ 11067	VE	2012/06/22	66023	1010			STE CATHERINE O				31		11	1	3		13		11	34		1				11	2	0	0	0	14:00:00-14:59:00	2012	0	Dommages matériels seulement	Montréal(06)	Montréal (66 )	1	0	0	0	0	0	0	0	0	0	0	0	1
SPVM _ 2012 _ 11068	SA	2012/06/23	66023				CRESCENT	1	SHERBROOKE O		31		11	3	3		14		11	33		1				11	2	0	0	0	12:00:00-12:59:00	2012	0	Dommages matériels seulement	Montréal(06)	Montréal (66 )	2	0	0	0	0	0	0	0	0	0	0	0	0
SPVM _ 2012 _ 11069	SA	2012/06/23	66023	1180			DE LA MONTAGNE OPPOSE						11	1	3		16		11			2				11	2	0	0	0	11:00:00-11:59:00	2012	0	Dommages matériels seulement	Montréal(06)	Montréal (66 )	1	1	0	0	0	0	0	0	0	0	0	0	0
SPVM _ 2012 _ 1107	ME	2012/12/26	66142	3616			BD ST JEAN				31		11	3	3		13	1	11	34	6	3				11	3	0	0	1	18:00:00-18:59:00	2012	1	Léger	Montréal(06)	Montréal (66 )	3	0	0	0	0	0	0	0	0	0	0	0	0
SPVM _ 2012 _ 11070	SA	2012/06/23	66023	1221			MACKAY				31		11	1	3		13		11	34		1				11	2	0	0	0	17:00:00-17:59:00	2012	0	Dommages matériels seulement	Montréal(06)	Montréal (66 )	2	0	0	0	0	0	0	0	0	0	0	0	0
SPVM _ 2012 _ 11071	JE	2012/06/21	66023	705			STE CATHERINE O				31		11	1	3		21										2	0	0	0	Non précisé	2012	0	Dommages matériels inférieurs au seuil de rapportage	Montréal(06)	Montréal (66 )	1	0	0	0	0	0	0	0	0	0	0	0	1
SPVM _ 2012 _ 11072	MA	2012/06/26	66023				DE MAISONNEUVE	1	GUY	15	38		11	3	3		15		11	33		1	2		E	11	1	0	0	0	00:00:00-00:59:00	2012	0	Dommages matériels seulement	Montréal(06)	Montréal (66 )	1	0	0	0	0	0	0	0	0	0	0	0	0
SPVM _ 2012 _ 11073	MA	2012/06/26	66023	500			DE LA MONTAGNE	2	N-D O		31		11	1	3		19		11	34		2				12	2	0	0	0	07:00:00-07:59:00	2012	0	Dommages matériels seulement	Montréal(06)	Montréal (66 )	2	0	0	0	0	0	0	0	0	0	0	0	0
SPVM _ 2012 _ 11074	MA	2012/06/26	66023	3450			MCTAVISH				31			1	1											12	2	0	0	0	Non précisé	2012	0	Dommages matériels inférieurs au seuil de rapportage	Montréal(06)	Montréal (66 )	2	0	0	0	0	0	0	0	0	0	0	0	0
SPVM _ 2012 _ 11075	ME	2012/06/27	66023					1	STE CATHERINE O ET DE LA MONTAGNE		31		12	3	3		13		11	33		1				14	2	0	0	0	02:00:00-02:59:00	2012	0	Dommages matériels inférieurs au seuil de rapportage	Montréal(06)	Montréal (66 )	2	0	0	0	0	0	0	0	0	0	0	0	0
SPVM _ 2012 _ 11076	ME	2012/06/27	66023					1	ST ANTOINE ET JEAN DESTRES	5	31		11	1	3		13		11	33		3			S	14	3	0	0	0	08:00:00-08:59:00	2012	0	Dommages matériels seulement	Montréal(06)	Montréal (66 )	3	0	0	0	0	0	0	0	0	0	0	0	0
SPVM _ 2012 _ 11077	ME	2012/06/27	66023				CEDAR	1	AV DES PINS	25	31		12	1	2		14		23	33		2			S	13	2	0	0	0	09:00:00-09:59:00	2012	0	Dommages matériels seulement	Montréal(06)	Montréal (66 )	2	0	0	0	0	0	0	0	0	0	0	0	0
SPVM _ 2012 _ 11078	ME	2012/06/27	66023				ST PAUL	1	LONGUEUIL		31		12	2	3		14		11	33		2				14	2	0	0	0	Non précisé	2012	0	Dommages matériels inférieurs au seuil de rapportage	Montréal(06)	Montréal (66 )	1	0	0	0	0	0	1	0	0	0	0	0	0
SPVM _ 2012 _ 11079	LU	2012/06/25	66023				STANLEY	1	DOCTOR PENFIELD		31				2		14			33		1					2	0	0	0	00:00:00-00:59:00	2012	0	Dommages matériels inférieurs au seuil de rapportage	Montréal(06)	Montréal (66 )	1	0	0	0	0	0	0	0	0	0	0	0	1
SPVM _ 2012 _ 1108	ME	2012/12/26	66142	44			GARLAND		FACE		31		16	3	2		14		11	34		2				11	2	0	0	0	21:00:00-21:59:00	2012	0	Dommages matériels seulement	Montréal(06)	Montréal (66 )	1	0	0	0	0	0	0	0	0	0	0	0	1
SPVM _ 2012 _ 11080	JE	2012/06/28	66023	2155			GUY				31		11	1	3		13		11	34		3				11	2	0	0	0	07:00:00-07:59:00	2012	0	Dommages matériels seulement	Montréal(06)	Montréal (66 )	1	1	0	0	0	0	0	0	0	0	0	0	0
SPVM _ 2012 _ 11081	JE	2012/06/28	66023					1	UNIVERSITE ET ST JACQUES		31		11	1	3		13	1	11	32	4	2				11	2	0	0	1	08:00:00-08:59:00	2012	1	Léger	Montréal(06)	Montréal (66 )	1	0	0	0	0	0	1	0	0	0	0	0	0
SPVM _ 2012 _ 11082	JE	2012/06/28	66023				WELLINGTON	1	YOUNG		31	1	11	1	3		13	1	11	32	6	3				11	2	0	0	1	16:00:00-16:59:00	2012	1	Léger	Montréal(06)	Montréal (66 )	2	0	0	0	0	0	0	0	0	0	0	0	0
SPVM _ 2012 _ 11083	VE	2012/06/29	66023				AV DES PINS	1	PEEL		40		12	3	9		15		23	33		1				14	2	0	0	0	02:00:00-02:59:00	2012	0	Dommages matériels seulement	Montréal(06)	Montréal (66 )	1	0	0	0	0	0	0	0	0	0	0	0	1
SPVM _ 2012 _ 11084	JE	2012/06/28	66023	451			STE CATHERINE O				49		11	1	3		21		11	99						11	1	0	0	0	08:00:00-08:59:00	2012	0	Dommages matériels inférieurs au seuil de rapportage	Montréal(06)	Montréal (66 )	1	0	0	0	0	0	0	0	0	0	0	0	0
SPVM _ 2012 _ 11085	JE	2012/06/28	66023				BRENNAN	1	ANN		31		11	1	3		13		11	34		1				11	2	0	0	0	Non précisé	2012	0	Dommages matériels inférieurs au seuil de rapportage	Montréal(06)	Montréal (66 )	1	0	0	0	0	0	0	0	0	0	0	0	1
SPVM _ 2012 _ 11086	MA	2012/06/26	66023				OVERDALE	1	MACKAY	50	31		11	3	3		19		11	33		1			E	11	2	0	0	0	07:00:00-07:59:00	2012	0	Dommages matériels seulement	Montréal(06)	Montréal (66 )	1	0	0	0	0	0	0	0	0	0	0	0	1
SPVM _ 2012 _ 11087	ME	2012/06/27	66023				ST ALEXANDRE	1	STE CATHERINE	10	31		12	1	3		13		11	33		1			S	11	2	0	0	0	07:00:00-07:59:00	2012	0	Dommages matériels inférieurs au seuil de rapportage	Montréal(06)	Montréal (66 )	1	0	0	0	0	0	0	0	0	0	0	0	1
SPVM _ 2012 _ 11088	VE	2012/06/29	66023				N-D	1	DE LA MONTAGNE	10	31		11	3	3		13		11	33		2			O	11	2	0	0	0	00:00:00-00:59:00	2012	0	Dommages matériels inférieurs au seuil de rapportage	Montréal(06)	Montréal (66 )	2	0	0	0	0	0	0	0	0	0	0	0	0
SPVM _ 2012 _ 11089	ME	2012/06/27	66023	700			GAUCHETIERE O				31		11	1	3		21		11	99							2	0	0	0	13:00:00-13:59:00	2012	0	Dommages matériels inférieurs au seuil de rapportage	Montréal(06)	Montréal (66 )	1	0	0	0	0	0	0	0	0	0	0	0	1
SPVM _ 2012 _ 1109	JE	2012/12/27	66142										16	3	3		21									17	2	0	0	0	18:00:00-18:59:00	2012	0	Dommages matériels inférieurs au seuil de rapportage	Montréal(06)	Montréal (66 )	1	0	0	0	0	0	0	0	0	0	0	0	1
SPVM _ 2012 _ 11090	JE	2012/06/28	66023	2020			UNIVRSITY				31				3		21									12	2	0	0	0	Non précisé	2012	0	Dommages matériels seulement	Montréal(06)	Montréal (66 )	1	0	0	0	0	0	0	0	0	0	0	0	1
SPVM _ 2012 _ 11091	VE	2012/06/29	66023				DE LA MONTAGNE		MAISONNEUVE	20	31		11	1	3		13		11	33		2			S	11	2	0	0	0	18:00:00-18:59:00	2012	0	Dommages matériels inférieurs au seuil de rapportage	Montréal(06)	Montréal (66 )	1	0	0	0	0	0	0	0	0	0	0	0	1
SPVM _ 2012 _ 11092	SA	2012/06/30	66023	980			GUY	1	GUY ET RENE LEVESQUE	50	33		11	1	3		13		12	33		3			S	11	2	0	0	0	10:00:00-10:59:00	2012	0	Dommages matériels inférieurs au seuil de rapportage	Montréal(06)	Montréal (66 )	1	0	0	0	1	0	0	0	0	0	0	0	0
SPVM _ 2012 _ 11093	SA	2012/06/30	66023				PEEL	1	CYPRESS		33		11	1	3		13	1	11	32	6	2				11	2	0	0	1	16:00:00-16:59:00	2012	1	Léger	Montréal(06)	Montréal (66 )	1	0	0	0	1	0	0	0	0	0	0	0	0
SPVM _ 2012 _ 11094	SA	2012/06/30	66023				DE LA MONTAGNE		OTTAWA		31		12	1	4		19	1	11	32	6	2	1			11	2	0	0	1	18:00:00-18:59:00	2012	1	Léger	Montréal(06)	Montréal (66 )	1	0	0	0	0	0	0	1	0	0	0	0	0
SPVM _ 2012 _ 11095	SA	2012/06/30	65005				SHERBROOKE	1	BISHOP		32		11	3	3		13		11	32		3				11	1	0	0	1	21:00:00-21:59:00	2012	1	Léger	Laval(13)	Laval (65 )	1	0	0	0	0	0	0	0	0	0	0	0	0
SPVM _ 2012 _ 11096	DI	2012/07/01	66023				RENE LEVESQUE	1	UNIVERSITY		31		11	3	3		13		11	32		3				11	2	0	0	0	02:00:00-02:59:00	2012	0	Dommages matériels seulement	Montréal(06)	Montréal (66 )	2	0	0	0	0	0	0	0	0	0	0	0	0
SPVM _ 2012 _ 11097	DI	2012/07/01	66023				SHERBROOKE O	1	STANLEY	5	31		11	3	3		14		11	33		3				11	2	0	0	0	02:00:00-02:59:00	2012	0	Dommages matériels seulement	Montréal(06)	Montréal (66 )	1	0	0	0	0	0	0	1	0	0	0	0	0
SPVM _ 2012 _ 11098	DI	2012/07/01	66023				DE LA MONTAGNE		SHERBROOKE	15	31		11	3	3		19		11	33		2				11	2	0	0	0	19:00:00-19:59:00	2012	0	Dommages matériels inférieurs au seuil de rapportage	Montréal(06)	Montréal (66 )	1	0	0	0	0	0	0	0	0	0	0	1	0
SPVM _ 2012 _ 11099	DI	2012/07/01	66023	1420			CRESCENT	1	STE CATHERINE	50	31		11	3	3		14		11	34		1			N	11	2	0	0	0	22:00:00-22:59:00	2012	0	Dommages matériels seulement	Montréal(06)	Montréal (66 )	2	0	0	0	0	0	0	0	0	0	0	0	0
SPVM _ 2012 _ 111	LU	2012/02/27	66023	52			4E AV S				31		16	1	2		14		11	35		2				17	2	0	0	0	07:00:00-07:59:00	2012	0	Dommages matériels inférieurs au seuil de rapportage	Montréal(06)	Montréal (66 )	2	0	0	0	0	0	0	0	0	0	0	0	0
SPVM _ 2012 _ 1110	JE	2012/12/27	66142	54	F		BIRKDALE				31		16	1	2		14									17	2	0	0	0	Non précisé	2012	0	Dommages matériels seulement	Montréal(06)	Montréal (66 )	1	0	0	0	0	0	0	0	0	0	0	0	1
SPVM _ 2012 _ 11100	DI	2012/07/01	66023				ST MAURICE		DE L INSPECTEUR	15	31				2		14		11	33		1					2	0	0	0	Non précisé	2012	0	Dommages matériels inférieurs au seuil de rapportage	Montréal(06)	Montréal (66 )	1	0	0	0	0	0	0	0	0	0	0	0	1
SPVM _ 2012 _ 11101	LU	2012/07/02	66023					1	RENE LEVESQUE O ET GUY		31	1	11	1	3		13	1	11	32	6	3				11	2	0	0	1	07:00:00-07:59:00	2012	1	Léger	Montréal(06)	Montréal (66 )	1	0	0	0	0	0	0	1	0	0	0	0	0
SPVM _ 2012 _ 11102	LU	2012/07/02	66023	500			DE LA MONTAGNE		ST JACQUES	100	31		11	1	2		22		11	34		2			N	11	1	0	0	0	12:00:00-12:59:00	2012	0	Dommages matériels inférieurs au seuil de rapportage	Montréal(06)	Montréal (66 )	0	1	0	0	0	0	0	0	0	0	0	0	0
SPVM _ 2012 _ 11103	DI	2012/07/01	66023	1605			DR PENFIELD				31		11	3	2		14		13	34		1			S	11	2	0	0	0	20:00:00-20:59:00	2012	0	Dommages matériels seulement	Montréal(06)	Montréal (66 )	2	0	0	0	0	0	0	0	0	0	0	0	0
SPVM _ 2012 _ 11104	LU	2012/07/02	66023				RENE LEVESQUE O		METCALFE	50	31		11	3	2		14		11	34		2				11	2	0	0	0	22:00:00-22:59:00	2012	0	Dommages matériels inférieurs au seuil de rapportage	Montréal(06)	Montréal (66 )	2	0	0	0	0	0	0	0	0	0	0	0	0
SPVM _ 2012 _ 11105	LU	2012/07/02	66023				REMEMBRANCE	1	CAMILLIEN HOUDE	10	31		11	1	7		21		11	99		9			S	11	2	0	0	0	19:00:00-19:59:00	2012	0	Dommages matériels seulement	Montréal(06)	Montréal (66 )	2	0	0	0	0	0	0	0	0	0	0	0	0
SPVM _ 2012 _ 11106	LU	2012/07/02	66023	3420			DRUMOND	1	PL MOUNTAIN	30	31		11	1	3		13		11	33		2			N	11	2	0	0	0	13:00:00-13:59:00	2012	0	Dommages matériels inférieurs au seuil de rapportage	Montréal(06)	Montréal (66 )	1	0	0	0	0	0	0	0	0	0	0	0	1
SPVM _ 2012 _ 11107	MA	2012/07/03	66023				MCKAY		STE CATHERINE	30			11	1	1		13		11	33		1			N	11	2	0	0	0	Non précisé	2012	0	Dommages matériels inférieurs au seuil de rapportage	Montréal(06)	Montréal (66 )	0	0	0	0	0	0	1	0	0	0	0	1	0
SPVM _ 2012 _ 11108	MA	2012/07/03	66023				COTE DES NEIGES	2	REMEMBRANCE	50	31		11	1	2		13		11	34		3			S	11	2	0	0	0	17:00:00-17:59:00	2012	0	Dommages matériels seulement	Montréal(06)	Montréal (66 )	1	0	0	0	0	0	0	1	0	0	0	0	0
SPVM _ 2012 _ 11109	MA	2012/07/03	66023				CATHCART		MCGILL COLLEGE		31		11		3		14		11	33		2					2	0	0	0	22:00:00-22:59:00	2012	0	Dommages matériels inférieurs au seuil de rapportage	Montréal(06)	Montréal (66 )	1	0	0	0	0	0	0	0	0	0	0	0	1
SPVM _ 2012 _ 1111	VE	2012/12/28	66023	77			WOODHAVABN				31		16	3	2		14		11	33		2				11	2	0	0	0	16:00:00-16:59:00	2012	0	Dommages matériels seulement	Montréal(06)	Montréal (66 )	1	0	0	0	0	0	0	0	0	0	0	0	1
SPVM _ 2012 _ 11110	ME	2012/07/04	66023					1	CRESCENT ET MAISONNEUVE		31		11	3	3		12		11	32		1				11	2	0	0	0	Non précisé	2012	0	Dommages matériels inférieurs au seuil de rapportage	Montréal(06)	Montréal (66 )	1	0	0	0	0	0	0	0	0	0	0	0	1
SPVM _ 2012 _ 11111	ME	2012/07/04	66023	1118			STE CATHERINE O				42		12	3	3		13		11	99		1			S	11	1	0	0	0	03:00:00-03:59:00	2012	0	Dommages matériels seulement	Montréal(06)	Montréal (66 )	1	0	0	0	0	0	0	0	0	0	0	0	0
SPVM _ 2012 _ 11112	ME	2012/07/04	66023					1	DUFORT ET ST CATHERINE		31		11	1	3		13		11	32		1				11	2	0	0	0	11:00:00-11:59:00	2012	0	Dommages matériels inférieurs au seuil de rapportage	Montréal(06)	Montréal (66 )	1	0	0	0	0	0	0	0	0	0	0	0	1
SPVM _ 2012 _ 11113	MA	2012/07/03	66023	1485			STANLEY				49		11				21										1	0	0	0	Non précisé	2012	0	Dommages matériels inférieurs au seuil de rapportage	Montréal(06)	Montréal (66 )	1	0	0	0	0	0	0	0	0	0	0	0	0
SPVM _ 2012 _ 11114	MA	2012/07/03	66023				MANSFIELD	1	RENE LEVESQUE		31		11	1	3		13		11			1				11	2	0	0	0	Non précisé	2012	0	Dommages matériels inférieurs au seuil de rapportage	Montréal(06)	Montréal (66 )	1	0	0	0	0	0	0	0	0	0	0	0	1
SPVM _ 2012 _ 11115	ME	2012/07/04	66023	1410			STANLEY	1	STE CATHERINE O	20	31		11	1	3		13		13	33		1			N	11	2	0	0	0	Non précisé	2012	0	Dommages matériels inférieurs au seuil de rapportage	Montréal(06)	Montréal (66 )	1	1	0	0	0	0	0	0	0	0	0	0	0
SPVM _ 2012 _ 11116	ME	2012/07/04	66023				SHERBROOKE O				33		11	1	3		13	1	11	34	6	3				12	3	0	0	1	14:00:00-14:59:00	2012	1	Léger	Montréal(06)	Montréal (66 )	1	1	0	0	1	0	0	0	0	0	0	0	0
SPVM _ 2012 _ 11117	ME	2012/07/04	66023				DR PENFIELD	1	DE LA MONTAGNE		50		11	1	2		14	1	11	32	6	1				11	2	0	0	1	15:00:00-15:59:00	2012	1	Léger	Montréal(06)	Montréal (66 )	1	0	0	0	0	0	1	0	0	0	0	0	0
SPVM _ 2012 _ 11118	ME	2012/07/04	66023	3460			PEEL				31		12	1	2		14	1	13	34	6	2				14	3	0	0	1	17:00:00-17:59:00	2012	1	Léger	Montréal(06)	Montréal (66 )	3	0	0	0	0	0	0	0	0	0	0	0	0
SPVM _ 2012 _ 11119	ME	2012/07/04	66023				ST ANTOINE	1	PEEL		33		11	3	3		13	1	11	32	5	3				11	2	0	1	0	23:00:00-23:59:00	2012	1	Grave	Montréal(06)	Montréal (66 )	1	0	0	0	1	0	0	0	0	0	0	0	0
SPVM _ 2012 _ 1112	VE	2012/12/28	66142	3237			DES SOURCES	2	STAT GAL DES SOURCES		31		16	1	3		21									12	2	0	0	0	Non précisé	2012	0	Dommages matériels inférieurs au seuil de rapportage	Montréal(06)	Montréal (66 )	1	0	0	0	0	0	0	0	0	0	0	0	1
SPVM _ 2012 _ 11120	ME	2012/07/04	66023	1243			DRUMMOND				31		11	1	3		21		11			3				12	2	0	0	0	16:00:00-16:59:00	2012	0	Dommages matériels inférieurs au seuil de rapportage	Montréal(06)	Montréal (66 )	2	0	0	0	0	0	0	0	0	0	0	0	0
SPVM _ 2012 _ 11121	JE	2012/06/07	66023	1000			PL JAEN PAUL RIOPELLE				31		11	1	3		21		11	32		1				11	2	0	0	0	08:00:00-08:59:00	2012	0	Dommages matériels seulement	Montréal(06)	Montréal (66 )	1	0	0	0	0	0	0	0	0	0	0	0	1
SPVM _ 2012 _ 11122	ME	2012/07/04	66023	550			LUCIEN L ALLIER	1	VICTOR HUGO	10	31			3	2		14		11	33		2			S		2	0	0	0	23:00:00-23:59:00	2012	0	Dommages matériels seulement	Montréal(06)	Montréal (66 )	1	1	0	0	0	0	0	0	0	0	0	0	0
SPVM _ 2012 _ 11123	DI	2012/05/20	66023	5			PL VILLE MARIE				31																2	0	0	0	00:00:00-00:59:00	2012	0	Dommages matériels inférieurs au seuil de rapportage	Montréal(06)	Montréal (66 )	1	0	0	0	0	0	0	0	0	0	0	0	1
SPVM _ 2012 _ 11124	JE	2012/07/05	66023				SHERBROOKE	1	MCGILL COLLEGE		33		11	1	3		13	1	11	32	6	3				11	2	0	0	1	17:00:00-17:59:00	2012	1	Léger	Montréal(06)	Montréal (66 )	1	0	0	0	1	0	0	0	0	0	0	0	0
SPVM _ 2012 _ 11125	VE	2012/06/22	66023	1600			REMEMBRANCE						11	1	7		21		11	99		2				11	2	0	0	0	09:00:00-09:59:00	2012	0	Dommages matériels inférieurs au seuil de rapportage	Montréal(06)	Montréal (66 )	1	0	0	0	0	0	0	0	0	0	0	0	1
SPVM _ 2012 _ 11126	VE	2012/07/06	66023				ST ANTOINE		LUCIEN L ALLIER		31		11	3	3		13	1	11	32	6	3				11	2	0	0	1	02:00:00-02:59:00	2012	1	Léger	Montréal(06)	Montréal (66 )	2	0	0	0	0	0	0	0	0	0	0	0	0
SPVM _ 2012 _ 11127	VE	2012/07/06	66023				MAISONNEUVE	1	GUY		33		11	3	3		13		11	32		1				11	2	0	0	1	23:00:00-23:59:00	2012	1	Léger	Montréal(06)	Montréal (66 )	1	0	0	0	1	0	0	0	0	0	0	0	0
SPVM _ 2012 _ 11128	JE	2012/06/07	66023	4	1		PL VILLE MARIE	2	STAT VILLE MARIE		31		11	1	3		21		11							11	2	0	0	0	15:00:00-15:59:00	2012	0	Dommages matériels inférieurs au seuil de rapportage	Montréal(06)	Montréal (66 )	2	0	0	0	0	0	0	0	0	0	0	0	0
SPVM _ 2012 _ 11129	VE	2012/07/06	66023				DE LA MONTAGNE	1	CANADIENS DE MONTREAL		31		11	1	3		19		13	32		2				11	2	0	0	0	09:00:00-09:59:00	2012	0	Dommages matériels inférieurs au seuil de rapportage	Montréal(06)	Montréal (66 )	0	1	0	0	0	0	0	0	1	0	0	0	0
SPVM _ 2012 _ 1113	SA	2012/12/29	66142				SALABERRY	1	THORNHILL		31		16	3	2		13	1	11	32	6	2				17	2	0	0	1	22:00:00-22:59:00	2012	1	Léger	Montréal(06)	Montréal (66 )	2	0	0	0	0	0	0	0	0	0	0	0	0
SPVM _ 2012 _ 11130	VE	2012/07/06	66023				PEEL	1	OTTAWA	1	31		11	1	2		13		11	32		3				11	2	0	0	0	09:00:00-09:59:00	2012	0	Dommages matériels seulement	Montréal(06)	Montréal (66 )	2	0	0	0	0	0	0	0	0	0	0	0	0
SPVM _ 2012 _ 11131	VE	2012/07/06	66023	3460			PEEL				31		11	1	2		21		11	99		9			N	11	2	0	0	0	07:00:00-07:59:00	2012	0	Dommages matériels seulement	Montréal(06)	Montréal (66 )	2	0	0	0	0	0	0	0	0	0	0	0	0
SPVM _ 2012 _ 11132	VE	2012/07/06	66023				DE MAISONNEUVE	1	DE LA MONTAGNE		33		11	1	3		13	1	11	32	6	1				11	2	0	0	1	15:00:00-15:59:00	2012	1	Léger	Montréal(06)	Montréal (66 )	0	1	0	0	1	0	0	0	0	0	0	0	0
SPVM _ 2012 _ 11133	VE	2012/07/06	66023	397			MAYOR				31		11	3	3		19		11	33		1				11	2	0	0	0	00:00:00-00:59:00	2012	0	Dommages matériels inférieurs au seuil de rapportage	Montréal(06)	Montréal (66 )	1	0	0	0	0	0	0	0	0	0	0	0	1
SPVM _ 2012 _ 11134	VE	2012/07/06	66023	3463			PEEL				31																2	0	0	0	18:00:00-18:59:00	2012	0	Dommages matériels inférieurs au seuil de rapportage	Montréal(06)	Montréal (66 )	2	0	0	0	0	0	0	0	0	0	0	0	0
SPVM _ 2012 _ 11135	VE	2012/07/06	66023				UNION		RENE LEVESQUE		31		11	3	3		13		11	32		3				11	2	0	0	0	22:00:00-22:59:00	2012	0	Dommages matériels inférieurs au seuil de rapportage	Montréal(06)	Montréal (66 )	2	0	0	0	0	0	0	0	0	0	0	0	0
SPVM _ 2012 _ 11136	SA	2012/07/07	66023				WILLIAM	1	NAZARETH		31		11	1	3		13		11	32		1				12	2	0	0	0	08:00:00-08:59:00	2012	0	Dommages matériels seulement	Montréal(06)	Montréal (66 )	2	0	0	0	0	0	0	0	0	0	0	0	0
SPVM _ 2012 _ 11137	SA	2012/07/07	66023	951			WILLIAMS				31		11	1	2		21		11	99		9			E	11	2	0	0	0	16:00:00-16:59:00	2012	0	Dommages matériels seulement	Montréal(06)	Montréal (66 )	2	0	0	0	0	0	0	0	0	0	0	0	0
SPVM _ 2012 _ 11138	SA	2012/07/07	66023				PEEL	1	N-D O		31		11	1	3		19		11	32		3				11	2	0	0	0	19:00:00-19:59:00	2012	0	Dommages matériels inférieurs au seuil de rapportage	Montréal(06)	Montréal (66 )	1	1	0	0	0	0	0	0	0	0	0	0	0
SPVM _ 2012 _ 11139	SA	2012/07/07	66023					1	ST JACQUES ET GAUVIN		31		11	3	3		13		11	32		1			S	12	2	0	0	0	21:00:00-21:59:00	2012	0	Dommages matériels seulement	Montréal(06)	Montréal (66 )	1	0	0	0	0	0	0	1	0	0	0	0	0
SPVM _ 2012 _ 1114	DI	2012/12/30	66142	206			AUTUMN	1	LAKE	10	49	3	16	1	2		22								S	12	1	0	0	0	14:00:00-14:59:00	2012	0	Dommages matériels seulement	Montréal(06)	Montréal (66 )	0	0	1	0	0	0	0	0	0	0	0	0	0
SPVM _ 2012 _ 11140	DI	2012/07/08	66023				SHERBROOKE	1	MC GILL COLLEGE				11	3	3		13		11			3				11	2	0	0	0	00:00:00-00:59:00	2012	0	Dommages matériels seulement	Montréal(06)	Montréal (66 )	2	0	0	0	0	0	0	0	0	0	0	0	0
SPVM _ 2012 _ 11141	SA	2012/07/07	66023					1	UNIVERSITE ET VIGER		31		11	3	3		13		13	32		3			O	12	2	0	0	0	23:00:00-23:59:00	2012	0	Dommages matériels seulement	Montréal(06)	Montréal (66 )	2	0	0	0	0	0	0	0	0	0	0	0	0
SPVM _ 2012 _ 11142	DI	2012/07/08	66023					1	PEEL ET ST ANTOINE		31		11	1	3		13	1	11	33	6	3				11	2	0	0	0	12:00:00-12:59:00	2012	0	Dommages matériels seulement	Montréal(06)	Montréal (66 )	1	0	0	0	0	0	1	0	0	0	0	0	0
SPVM _ 2012 _ 11143	DI	2012/07/08	66023				COTE DES NEIGES	1	SUMMER HILL	50			11	3	2		13		13	33		3			S	11	2	0	0	0	19:00:00-19:59:00	2012	0	Dommages matériels seulement	Montréal(06)	Montréal (66 )	1	0	0	0	0	0	1	0	0	0	0	0	0
SPVM _ 2012 _ 11144	LU	2012/07/09	66023	1500			MCGILL COLLEGE						11	1	3		21			34						11	2	0	0	0	Non précisé	2012	0	Dommages matériels inférieurs au seuil de rapportage	Montréal(06)	Montréal (66 )	1	0	0	0	0	0	0	0	0	0	0	0	1
SPVM _ 2012 _ 11145	DI	2012/07/08	66023	2044			METCALFE								3		21										2	0	0	0	13:00:00-13:59:00	2012	0	Dommages matériels inférieurs au seuil de rapportage	Montréal(06)	Montréal (66 )	1	0	0	0	0	0	0	0	0	0	0	0	1
SPVM _ 2012 _ 11146	SA	2012/07/07	66023	800			SQUARE VICTORIA				52		11	3	3		21		11								1	0	0	0	23:00:00-23:59:00	2012	0	Dommages matériels seulement	Montréal(06)	Montréal (66 )	1	0	0	0	0	0	0	0	0	0	0	0	0
SPVM _ 2012 _ 11147	LU	2012/07/09	66023				DE LA GAUCHETIERE	1	UNIVERSITY	5	33		11	1	3		19	1	11	32	6	2			E	11	2	0	0	1	10:00:00-10:59:00	2012	1	Léger	Montréal(06)	Montréal (66 )	0	0	0	1	1	0	0	0	0	0	0	0	0
SPVM _ 2012 _ 11148	DI	2012/07/08	66023	1333			N-D O NO 102	2	DE LA MONTAGNE		31		11	3	2		14		11	34		3				11	2	0	0	0	19:00:00-19:59:00	2012	0	Dommages matériels seulement	Montréal(06)	Montréal (66 )	1	0	0	0	0	0	0	0	0	0	0	0	1
SPVM _ 2012 _ 11149	LU	2012/07/09	66023	687			DES PINS				31		11				21			99						11	2	0	0	0	08:00:00-08:59:00	2012	0	Dommages matériels seulement	Montréal(06)	Montréal (66 )	1	0	0	0	0	0	0	0	0	0	0	0	1
SPVM _ 2012 _ 1115	DI	2012/12/30	66142								31		18	1	3		13	1	11			3				11	2	0	0	2	15:00:00-15:59:00	2012	2	Léger	Montréal(06)	Montréal (66 )	2	0	0	0	0	0	0	0	0	0	0	0	0
SPVM _ 2012 _ 11150	MA	2012/07/10	66023				UNIVERSITY	1	SHERBROOKE		31		11	1	3		13		11	32		3				11	2	0	0	0	09:00:00-09:59:00	2012	0	Dommages matériels seulement	Montréal(06)	Montréal (66 )	1	1	0	0	0	0	0	0	0	0	0	0	0
SPVM _ 2012 _ 11151	JE	2012/06/28	66023				PEEL	1	SHERBROOKE		31			1	3		13		11	33							2	0	0	0	Non précisé	2012	0	Dommages matériels inférieurs au seuil de rapportage	Montréal(06)	Montréal (66 )	1	0	0	0	0	0	0	0	0	0	0	0	1
SPVM _ 2012 _ 11152	MA	2012/07/10	66023				UNIVERSITY	1	MAISONNEUVE		31		11	1	3		13		11	32		1				11	2	0	0	0	14:00:00-14:59:00	2012	0	Dommages matériels seulement	Montréal(06)	Montréal (66 )	2	0	0	0	0	0	0	0	0	0	0	0	0
SPVM _ 2012 _ 11153	VE	2012/07/06	66023	1234			DE LA MONTAGNE	1	STE CATHERINE				11	3	3				11	34		2				11	2	0	0	0	23:00:00-23:59:00	2012	0	Dommages matériels inférieurs au seuil de rapportage	Montréal(06)	Montréal (66 )	1	0	0	0	0	0	0	0	0	0	0	0	1
SPVM _ 2012 _ 11154	MA	2012/07/10	66023				MANSFIELD	1	ST ANTOINE O	10	31		11	1	3		13		13	33		1			N	11	2	0	0	0	15:00:00-15:59:00	2012	0	Dommages matériels seulement	Montréal(06)	Montréal (66 )	2	0	0	0	0	0	0	0	0	0	0	0	0
SPVM _ 2012 _ 11155	MA	2012/07/10	66023					1	PRESIDENT KENNEDY ET UNIVERSITY	20			11	1	3		13		11	33		2			O	11	2	0	0	0	16:00:00-16:59:00	2012	0	Dommages matériels inférieurs au seuil de rapportage	Montréal(06)	Montréal (66 )	2	0	0	0	0	0	0	0	0	0	0	0	0
SPVM _ 2012 _ 11156	VE	2012/06/15	66023	1			PL VILLE MARIE						11														2	0	0	0	10:00:00-10:59:00	2012	0	Dommages matériels inférieurs au seuil de rapportage	Montréal(06)	Montréal (66 )	1	0	0	0	0	0	0	0	0	0	0	0	1
SPVM _ 2012 _ 11157	SA	2012/06/30	66023				UNIVERSITY	1	ST ANTOINE	30	31		11	3	3		13		11	34		1			S	11	2	0	0	0	22:00:00-22:59:00	2012	0	Dommages matériels inférieurs au seuil de rapportage	Montréal(06)	Montréal (66 )	2	0	0	0	0	0	0	0	0	0	0	0	0
SPVM _ 2012 _ 11158	MA	2012/07/10	66023				SHERBROOKE	1	MCGILL COLLEGE	6	31		11	1	3		13		11	33		2			E	11	2	0	0	0	09:00:00-09:59:00	2012	0	Dommages matériels inférieurs au seuil de rapportage	Montréal(06)	Montréal (66 )	0	0	0	0	0	0	1	0	0	0	0	0	1
SPVM _ 2012 _ 11159	LU	2012/07/09	66023	1600			REMEMBRANCE							3	5		19		11	34		9					2	0	0	0	23:00:00-23:59:00	2012	0	Dommages matériels seulement	Montréal(06)	Montréal (66 )	2	0	0	0	0	0	0	0	0	0	0	0	0
SPVM _ 2012 _ 1116	DI	2012/12/30	66142	5			RADISSON				31		16	1	2		14		11	34		2				11	2	0	0	0	11:00:00-11:59:00	2012	0	Dommages matériels seulement	Montréal(06)	Montréal (66 )	1	0	0	0	0	0	0	0	0	0	0	0	1
SPVM _ 2012 _ 11160	ME	2012/07/11	66023					1	MAISONNEUVE DRUMMOND	10	31		11	1	3		13		11	32		1			E	11	2	0	0	0	14:00:00-14:59:00	2012	0	Dommages matériels seulement	Montréal(06)	Montréal (66 )	1	1	0	0	0	0	0	0	0	0	0	0	0
SPVM _ 2012 _ 11161	ME	2012/07/11	66023				PEEL	1	SHERBROOKE	10	31		11	1	3							2			S	11	2	0	0	0	11:00:00-11:59:00	2012	0	Dommages matériels seulement	Montréal(06)	Montréal (66 )	1	0	0	0	0	0	0	0	0	0	0	0	1
SPVM _ 2012 _ 11162	ME	2012/07/11	66023	1100			UNIVERSITY	1	BELMONT	100	31		11	1	3		13		13	34		3			N	11	2	0	0	0	13:00:00-13:59:00	2012	0	Dommages matériels inférieurs au seuil de rapportage	Montréal(06)	Montréal (66 )	0	0	0	0	0	1	0	0	0	0	0	0	1
SPVM _ 2012 _ 11163	JE	2012/07/12	66023				DRUMMOND	1	RENE LEVESQUE O		99		11	3	3		13	1	11	32	6	3			O	11	1	0	0	1	03:00:00-03:59:00	2012	1	Léger	Montréal(06)	Montréal (66 )	0	0	0	1	0	0	0	0	0	0	0	0	0
SPVM _ 2012 _ 11164	JE	2012/07/12	66023				WILLIAM	1	DE LA MONTAGNE		31		11	1	3		13		11	32		1				11	2	0	0	0	10:00:00-10:59:00	2012	0	Dommages matériels seulement	Montréal(06)	Montréal (66 )	1	1	0	0	0	0	0	0	0	0	0	0	0
SPVM _ 2012 _ 11165	JE	2012/07/12	66023				GUY	1	ST JACQUES		31		11	1	2		13		14	32		3			N	11	2	0	0	0	18:00:00-18:59:00	2012	0	Dommages matériels seulement	Montréal(06)	Montréal (66 )	1	0	0	0	0	0	0	0	1	0	0	0	0
SPVM _ 2012 _ 11166	JE	2012/07/12	66023				N-D		ST HENRI		31		11	2	3		14		11	33						11	2	0	0	0	Non précisé	2012	0	Dommages matériels inférieurs au seuil de rapportage	Montréal(06)	Montréal (66 )	1	0	0	0	0	0	0	0	0	0	0	0	1
SPVM _ 2012 _ 11167	VE	2012/07/13	66023	280			DE LA MONTAGNE	1	OTTAWA	2	31		11	1	3		13		11	32		2			N	11	2	0	0	0	10:00:00-10:59:00	2012	0	Dommages matériels seulement	Montréal(06)	Montréal (66 )	1	1	0	0	0	0	0	0	0	0	0	0	0
SPVM _ 2012 _ 11168	JE	2012/07/12	66023	1080			OPP A BEAVER HALL				31				3		21										2	0	0	0	Non précisé	2012	0	Dommages matériels inférieurs au seuil de rapportage	Montréal(06)	Montréal (66 )	1	0	0	0	0	0	0	0	0	0	0	0	1
SPVM _ 2012 _ 11169	VE	2012/07/13	66023	600			MAISONNEUVE O				31				3		21		11	99		9					2	0	0	0	Non précisé	2012	0	Dommages matériels inférieurs au seuil de rapportage	Montréal(06)	Montréal (66 )	1	0	0	0	0	0	0	0	0	0	0	0	1
SPVM _ 2012 _ 1117	LU	2012/12/31	66142	309			HURTEAU	1	LAKE	100	31		16	3	2		14		11	33		2			S	17	3	0	0	0	03:00:00-03:59:00	2012	0	Dommages matériels seulement	Montréal(06)	Montréal (66 )	3	0	0	0	0	0	0	0	0	0	0	0	0
SPVM _ 2012 _ 11170	VE	2012/07/13	66023	3480			SIMPSON				31		11		9		21			99						99	2	0	0	0	Non précisé	2012	0	Dommages matériels inférieurs au seuil de rapportage	Montréal(06)	Montréal (66 )	2	0	0	0	0	0	0	0	0	0	0	0	0
SPVM _ 2012 _ 11171	SA	2012/07/14	66023				COTE DES NEIGES	1	GUY	5	40		11	2	3		13	1	11	32	6	3				11	1	0	0	1	03:00:00-03:59:00	2012	1	Léger	Montréal(06)	Montréal (66 )	1	0	0	0	0	0	0	0	0	0	0	0	0
SPVM _ 2012 _ 11172	SA	2012/07/14	66023				LUCIEN L ALLIER	1	ST ANTOINE		31		11	1	3		13	1	11	32		3			S	11	2	0	0	1	12:00:00-12:59:00	2012	1	Léger	Montréal(06)	Montréal (66 )	1	0	0	0	0	0	1	0	0	0	0	0	0
SPVM _ 2012 _ 11173	SA	2012/07/14	66023				SHERBROOKE	1	MC TAVISH	1	31		11	3	1		14		11	32		3			O	11	2	0	0	0	23:00:00-23:59:00	2012	0	Dommages matériels seulement	Montréal(06)	Montréal (66 )	2	0	0	0	0	0	0	0	0	0	0	0	0
SPVM _ 2012 _ 11174	DI	2012/07/15	66023				CATHEDRALE ET RENE LEVESQUE	1			43		11	3	3		13		11	32		3				11	1	0	0	0	02:00:00-02:59:00	2012	0	Dommages matériels seulement	Montréal(06)	Montréal (66 )	1	0	0	0	0	0	0	0	0	0	0	0	0
SPVM _ 2012 _ 11175	SA	2012/04/14	66023				PEEL ET GAUCHETIERE				31		11	1	3		13		11	34		1				11	2	0	0	0	Non précisé	2012	0	Dommages matériels inférieurs au seuil de rapportage	Montréal(06)	Montréal (66 )	1	0	0	0	0	0	0	0	0	0	0	0	1
SPVM _ 2012 _ 11176	DI	2012/07/15	66023				DE LA MONTAGNE	1	BD DE MAISONNEUVE O		31		11	3	3		13		21	32		2				11	2	0	0	0	02:00:00-02:59:00	2012	0	Dommages matériels inférieurs au seuil de rapportage	Montréal(06)	Montréal (66 )	1	0	0	0	0	0	0	0	0	0	0	1	0
SPVM _ 2012 _ 11177	LU	2012/07/16	66023	440			RENE LEVESQUE O				31		11	1	3		13		13	32		3			S	11	2	0	0	0	13:00:00-13:59:00	2012	0	Dommages matériels seulement	Montréal(06)	Montréal (66 )	2	0	0	0	0	0	0	0	0	0	0	0	0
SPVM _ 2012 _ 11178	LU	2012/07/16	66023					1	DRUMMOND ET SHERBROOKE		31		12	1	3		13		11	32		2				11	2	0	0	0	14:00:00-14:59:00	2012	0	Dommages matériels seulement	Montréal(06)	Montréal (66 )	1	0	0	0	0	0	0	1	0	0	0	0	0
SPVM _ 2012 _ 11179	MA	2012/07/17	66023	360			MAISONNEUVE				40		12	3	3		13		11	32		1			O	14	1	0	0	0	03:00:00-03:59:00	2012	0	Dommages matériels seulement	Montréal(06)	Montréal (66 )	1	0	0	0	0	0	0	0	0	0	0	0	0
SPVM _ 2012 _ 1118	SA	2012/12/29	66023	3079			DES SOURCES				31		16		3		21			40							2	0	0	0	14:00:00-14:59:00	2012	0	Dommages matériels inférieurs au seuil de rapportage	Montréal(06)	Montréal (66 )	1	0	0	0	0	0	0	0	0	0	0	0	1
SPVM _ 2012 _ 11180	MA	2012/07/17	66023				ST ANTOINE	1	UNIVERSITY	15	59		12	1	3		13		11	33		3			O	12	1	0	0	0	10:00:00-10:59:00	2012	0	Dommages matériels seulement	Montréal(06)	Montréal (66 )	0	1	0	0	0	0	0	0	0	0	0	0	0
SPVM _ 2012 _ 11181	MA	2012/07/17	66023				UNIVERSITY	1	SHERBROOKE		31		12	1	3		13		11	34		1				14	2	0	0	0	10:00:00-10:59:00	2012	0	Dommages matériels seulement	Montréal(06)	Montréal (66 )	2	0	0	0	0	0	0	0	0	0	0	0	0
SPVM _ 2012 _ 11182	MA	2012/07/17	66023				STE CATHERINE	1	GUY		31		11	1	3		13	1	11	32	6	3			N	12	2	0	0	3	14:00:00-14:59:00	2012	3	Léger	Montréal(06)	Montréal (66 )	2	0	0	0	0	0	0	0	0	0	0	0	0
SPVM _ 2012 _ 11183	ME	2012/07/18	66023				COTE DES NEIGES	1	SUMMERHILL	15	31		11	1	2		13		13	33		2			N	11	3	0	0	0	10:00:00-10:59:00	2012	0	Dommages matériels seulement	Montréal(06)	Montréal (66 )	3	0	0	0	0	0	0	0	0	0	0	0	0
SPVM _ 2012 _ 11184	ME	2012/07/18	66023				DE MAISONNEUVE				31		11	1	3		13		11	33		3				11	2	0	0	0	Non précisé	2012	0	Dommages matériels seulement	Montréal(06)	Montréal (66 )	1	0	0	0	0	0	0	0	0	0	0	0	1
SPVM _ 2012 _ 11185	ME	2012/07/18	66023				ST ANTOINE O	1	UNIVERSITY	20	31		11	1	3		13		11	33		3			O	11	2	0	0	0	16:00:00-16:59:00	2012	0	Dommages matériels inférieurs au seuil de rapportage	Montréal(06)	Montréal (66 )	0	1	0	1	0	0	0	0	0	0	0	0	0
SPVM _ 2012 _ 11186	ME	2012/07/11	66023				RENE LEVESQUE	1	DE LA MONTAGNE		31		11	2	3		21		11	32							2	0	0	0	17:00:00-17:59:00	2012	0	Dommages matériels seulement	Montréal(06)	Montréal (66 )	1	0	0	0	0	0	0	0	0	0	0	0	1
SPVM _ 2012 _ 11187	SA	2012/07/14	66023				STANLEY	1	STE CATHERINE	6			11	1	3		13		11	32		1			N	11	2	0	0	0	12:00:00-12:59:00	2012	0	Dommages matériels seulement	Montréal(06)	Montréal (66 )	1	0	0	0	1	0	0	0	0	0	0	0	0
SPVM _ 2012 _ 11188	JE	2012/07/19	66023					1	RENE LEVESQUE ET MONTAGNE		31		11	3	3		13		11	32		3				11	1	0	0	0	03:00:00-03:59:00	2012	0	Dommages matériels seulement	Montréal(06)	Montréal (66 )	1	0	0	0	0	0	0	0	0	0	0	0	0
SPVM _ 2012 _ 11189	ME	2012/07/18	66023	1390			WILLIAM						11	3	3		14		11	34		1				11	2	0	0	0	22:00:00-22:59:00	2012	0	Dommages matériels inférieurs au seuil de rapportage	Montréal(06)	Montréal (66 )	1	0	0	0	0	0	0	0	0	0	0	0	1
SPVM _ 2012 _ 1119	DI	2012/12/30	66142	65			CASTILLON				31		16	1	2		14									11	2	0	0	0	Non précisé	2012	0	Dommages matériels inférieurs au seuil de rapportage	Montréal(06)	Montréal (66 )	1	0	0	0	0	0	0	0	0	0	0	0	1
SPVM _ 2012 _ 11190	ME	2012/07/11	66023	1			UNIVERSITY	1	SHERBROOKE				11	1	3		13		13	33		1				11	2	0	0	0	17:00:00-17:59:00	2012	0	Dommages matériels inférieurs au seuil de rapportage	Montréal(06)	Montréal (66 )	2	0	0	0	0	0	0	0	0	0	0	0	0
SPVM _ 2012 _ 11191	JE	2012/07/19	66023				DES PINS	1	PEEL		31		11	1			13		11	33		1			E	11	2	0	0	0	15:00:00-15:59:00	2012	0	Dommages matériels inférieurs au seuil de rapportage	Montréal(06)	Montréal (66 )	1	0	0	0	0	0	0	1	0	0	0	0	0
SPVM _ 2012 _ 11192	LU	2012/07/02	66023	1745			CEDAR	1	COTE DES NEIGES	30	31		11	1	2		21		11	99		9				99	2	0	0	0	18:00:00-18:59:00	2012	0	Dommages matériels inférieurs au seuil de rapportage	Montréal(06)	Montréal (66 )	2	0	0	0	0	0	0	0	0	0	0	0	0
SPVM _ 2012 _ 11193	JE	2012/07/19	66023				STE CATHERINE O	1	PEEL		72		11	1	3		13	1	11	32	6	1				11	1	0	0	1	19:00:00-19:59:00	2012	1	Léger	Montréal(06)	Montréal (66 )	0	0	0	0	0	1	0	0	0	0	0	0	0
SPVM _ 2012 _ 11194	VE	2012/07/20	66023				UNIVERSITY	1	ST JACQUES	100	50		11	3	3		13	1	14	33	6	4			N	11	2	0	0	5	02:00:00-02:59:00	2012	5	Léger	Montréal(06)	Montréal (66 )	1	0	0	0	0	0	0	1	0	0	0	0	0
SPVM _ 2012 _ 11195	DI	2012/07/15	66023	355			STE CATHERINE O	1	BLEURY	5	31		11	1	3		21		11	40		9			O	11	2	0	0	0	20:00:00-20:59:00	2012	0	Dommages matériels inférieurs au seuil de rapportage	Montréal(06)	Montréal (66 )	1	0	0	0	0	0	0	0	0	0	0	0	1
SPVM _ 2012 _ 11196	ME	2012/07/18	66023	1529			CEDAR				31		11	3	2		14									11	2	0	0	0	20:00:00-20:59:00	2012	0	Dommages matériels inférieurs au seuil de rapportage	Montréal(06)	Montréal (66 )	1	0	0	0	0	0	0	0	0	0	0	0	1
SPVM _ 2012 _ 11197	VE	2012/07/20	66023				DR PENFIELD	1	DU MUSEE		31		11	1	2		14	1	11	32	6	1				11	3	0	0	2	18:00:00-18:59:00	2012	2	Léger	Montréal(06)	Montréal (66 )	3	0	0	0	0	0	0	0	0	0	0	0	0
SPVM _ 2012 _ 11198	SA	2012/07/21	66023				ST ANTOINE O	1	DE LA CATHEDRALE	15	31		11	1	3		13		11	33		3				11	2	0	0	0	20:00:00-20:59:00	2012	0	Dommages matériels inférieurs au seuil de rapportage	Montréal(06)	Montréal (66 )	1	0	0	0	0	0	0	0	0	0	0	0	1
SPVM _ 2012 _ 11199	VE	2012/07/20	66023	687			DES PINS O				31		11	1	3		21		11	99		9				11	2	0	0	0	09:00:00-09:59:00	2012	0	Dommages matériels seulement	Montréal(06)	Montréal (66 )	1	0	0	0	0	0	0	0	0	0	0	0	1
SPVM _ 2012 _ 112	SA	2012/01/21	66023					1	BD PIERREFONDS ET FREDMIR		31				2		13			33		3					2	0	0	0	Non précisé	2012	0	Dommages matériels inférieurs au seuil de rapportage	Montréal(06)	Montréal (66 )	2	0	0	0	0	0	0	0	0	0	0	0	0
SPVM _ 2012 _ 1120	LU	2012/12/31	66142	167			ATHENES				31		16		2		21		11	34						17	2	0	0	0	16:00:00-16:59:00	2012	0	Dommages matériels inférieurs au seuil de rapportage	Montréal(06)	Montréal (66 )	1	0	0	0	0	0	0	0	0	0	0	1	0
SPVM _ 2012 _ 11200	VE	2012/06/08	66023	75			QUEEN				31		11		3		21		11			9					2	0	0	0	19:00:00-19:59:00	2012	0	Dommages matériels inférieurs au seuil de rapportage	Montréal(06)	Montréal (66 )	1	0	0	0	0	0	0	0	0	0	0	0	1
SPVM _ 2012 _ 11201	LU	2012/07/23	66023	1432			CRESCENT	1	STE CATHERINE	100	31		12	2	3		12		11	34		1			S	15	2	0	0	0	22:00:00-22:59:00	2012	0	Dommages matériels seulement	Montréal(06)	Montréal (66 )	2	0	0	0	0	0	0	0	0	0	0	0	0
SPVM _ 2012 _ 11202	LU	2012/07/23	66023				NAZARETH	1	OTTAWA	5	40		12	2	3		11		11	33		1	2		N	14	1	0	0	0	18:00:00-18:59:00	2012	0	Dommages matériels inférieurs au seuil de rapportage	Montréal(06)	Montréal (66 )	0	0	0	0	0	0	0	0	0	0	0	0	1
SPVM _ 2012 _ 11203	VE	2012/07/20	66023	700			LA GAUCHETIERE	2	UNIVERSITY	100	31		11	3	9		19		13	34		1			O		2	0	0	0	16:00:00-16:59:00	2012	0	Dommages matériels inférieurs au seuil de rapportage	Montréal(06)	Montréal (66 )	1	0	0	0	0	0	0	0	0	0	0	0	1
SPVM _ 2012 _ 11204	SA	2012/07/21	66023				BD RENE LEVESQUE O	1	DE LA MONTAGNE	5	31		11	3	4		13		11			3				11	2	0	0	0	21:00:00-21:59:00	2012	0	Dommages matériels inférieurs au seuil de rapportage	Montréal(06)	Montréal (66 )	1	0	0	0	0	0	0	0	0	0	0	1	0
SPVM _ 2012 _ 11205	LU	2012/07/23	66023				SHERBROOKE	1	UNIVERSITE		33		11	2	3		14		11	33		3				14	2	0	0	1	17:00:00-17:59:00	2012	1	Léger	Montréal(06)	Montréal (66 )	1	0	0	0	1	0	0	0	0	0	0	0	0
SPVM _ 2012 _ 11206	ME	2012/07/25	66023				CATHEDRALE	1	ST JACQUES		32		11	1	3		13	1	14	32	6	1				11	1	0	0	2	08:00:00-08:59:00	2012	2	Léger	Montréal(06)	Montréal (66 )	0	0	0	1	0	0	0	0	0	0	0	0	0
SPVM _ 2012 _ 11207	ME	2012/07/25	66023					1	UNIVERSITY ET ST ANTOINE		31		11	1	3		13		11	32		5			S	11	2	0	0	0	10:00:00-10:59:00	2012	0	Dommages matériels seulement	Montréal(06)	Montréal (66 )	2	0	0	0	0	0	0	0	0	0	0	0	0
SPVM _ 2012 _ 11208	ME	2012/07/25	66023	1430			MONTAGNE	2	MAISONNEUVE O		33		11	1	3		12	1	11	34	6	2				11	2	0	0	1	11:00:00-11:59:00	2012	1	Léger	Montréal(06)	Montréal (66 )	1	0	0	0	1	0	0	0	0	0	0	0	0
SPVM _ 2012 _ 11209	JE	2012/07/26	66023				DE LA MONTAGNE	1	DOCTEUR PENFIELD	150	31		11	1	2		14	1	13	34	6	2			S	12	2	0	0	1	08:00:00-08:59:00	2012	1	Léger	Montréal(06)	Montréal (66 )	2	0	0	0	0	0	0	0	0	0	0	0	0
SPVM _ 2012 _ 1121	SA	2012/12/29	66142				TERR MTL				31		16													17	2	0	0	0	Non précisé	2012	0	Dommages matériels inférieurs au seuil de rapportage	Montréal(06)	Montréal (66 )	1	0	0	0	0	0	0	0	0	0	0	0	1
SPVM _ 2012 _ 11210	JE	2012/07/26	66023	2022			STANLEY	1	MAISONNEUVE	15	31		11	1	3		13		11	33		1			N	12	2	0	0	0	12:00:00-12:59:00	2012	0	Dommages matériels inférieurs au seuil de rapportage	Montréal(06)	Montréal (66 )	2	0	0	0	0	0	0	0	0	0	0	0	0
SPVM _ 2012 _ 11211	JE	2012/07/26	66023	777			UNIVERSITY				31	9	11	1	3		21		11	99						11	2	0	0	0	Non précisé	2012	0	Dommages matériels inférieurs au seuil de rapportage	Montréal(06)	Montréal (66 )	1	0	0	0	0	0	0	0	0	0	0	0	1
SPVM _ 2012 _ 11212	JE	2012/07/26	66023				DE LA MONTAGNE	1	AV DES CANADIENS DE MTL	1	31		11	1	3		13		11	32		2			N	11	2	0	0	0	19:00:00-19:59:00	2012	0	Dommages matériels inférieurs au seuil de rapportage	Montréal(06)	Montréal (66 )	0	0	0	0	0	0	0	2	0	0	0	0	0
SPVM _ 2012 _ 11213	VE	2012/07/27	66023				RENE LEVESQUE O	1	PEEL		31	9	11	3	3		13		11	32		3				11	2	0	0	0	02:00:00-02:59:00	2012	0	Dommages matériels seulement	Montréal(06)	Montréal (66 )	1	0	0	1	0	0	0	0	0	0	0	0	0
SPVM _ 2012 _ 11214	VE	2012/07/27	66023				PEEL	1	CYPRESS		41		11	1	3		13		11	32		2				11	1	0	0	0	03:00:00-03:59:00	2012	0	Dommages matériels inférieurs au seuil de rapportage	Montréal(06)	Montréal (66 )	0	1	0	0	0	0	0	0	0	0	0	0	0
SPVM _ 2012 _ 11215	MA	2012/07/24	66023				ST ALEXANDRE	2	MAYOR		31		11	1	3		13		11	33		1			O		2	0	0	0	Non précisé	2012	0	Dommages matériels inférieurs au seuil de rapportage	Montréal(06)	Montréal (66 )	0	0	0	0	0	1	0	0	0	0	0	0	1
SPVM _ 2012 _ 11216	VE	2012/07/27	66023						VILLE DE MTL TERR		31																2	0	0	0	Non précisé	2012	0	Dommages matériels inférieurs au seuil de rapportage	Montréal(06)	Montréal (66 )	1	0	0	0	0	0	0	0	0	0	0	0	1
SPVM _ 2012 _ 11217	VE	2012/07/27	66023						1100 N-D O		31		11	1	1		21		11			2				11	2	0	0	0	11:00:00-11:59:00	2012	0	Dommages matériels inférieurs au seuil de rapportage	Montréal(06)	Montréal (66 )	2	0	0	0	0	0	0	0	0	0	0	0	0
SPVM _ 2012 _ 11218	SA	2012/07/28	66023				LUCIEN L ALLIER	1	ST ANTOINE		31		11	1	2		13	1	11	32	6	1				11	2	0	1	0	15:00:00-15:59:00	2012	1	Grave	Montréal(06)	Montréal (66 )	1	0	0	0	0	1	0	0	0	0	0	0	0
SPVM _ 2012 _ 11219	DI	2012/07/29	66023				COTE DES NEIGES	1	RIV DES PINS	15	33		11	3	2		13		22	33		1			N	11	2	0	0	1	02:00:00-02:59:00	2012	1	Léger	Montréal(06)	Montréal (66 )	0	0	0	0	1	0	0	1	0	0	0	0	0
SPVM _ 2012 _ 1122	VE	2012/12/28	66142	2			CUMBERLAND FACE A				31		16		2		14		11							17	2	0	0	0	11:00:00-11:59:00	2012	0	Dommages matériels inférieurs au seuil de rapportage	Montréal(06)	Montréal (66 )	1	0	0	0	0	0	0	0	0	0	0	0	1
SPVM _ 2012 _ 11220	DI	2012/07/29	66023				DE LA MONTAGNE	1	DES CANADIENS DE MTL	30	31		11	1	2		13		13	33		2			N	11	1	0	0	0	07:00:00-07:59:00	2012	0	Dommages matériels seulement	Montréal(06)	Montréal (66 )	1	0	0	0	0	0	0	0	0	0	0	0	0
SPVM _ 2012 _ 11221	DI	2012/07/29	66023				CAMILIEN HOUDE		MT ROYAL	30			11	1	7		12		23	99		2			O	11	2	0	0	0	11:00:00-11:59:00	2012	0	Dommages matériels inférieurs au seuil de rapportage	Montréal(06)	Montréal (66 )	1	0	0	0	0	0	0	0	0	0	0	0	1
SPVM _ 2012 _ 11222	DI	2012/07/29	66023	425			AQUEDUC						11	1	2		14		11	33		2				11	2	0	0	0	18:00:00-18:59:00	2012	0	Dommages matériels seulement	Montréal(06)	Montréal (66 )	1	0	0	0	0	0	1	0	0	0	0	0	0
SPVM _ 2012 _ 11223	DI	2012/07/29	66023	3505			PEEL OPP																				2	0	0	0	20:00:00-20:59:00	2012	0	Dommages matériels inférieurs au seuil de rapportage	Montréal(06)	Montréal (66 )	2	0	0	0	0	0	0	0	0	0	0	0	0
SPVM _ 2012 _ 11224	LU	2012/07/30	66023				GUY		STE CATHERINE		31		11	3	3		12	1	11	32	6	3				11	2	0	0	1	00:00:00-00:59:00	2012	1	Léger	Montréal(06)	Montréal (66 )	1	0	0	0	0	0	0	1	0	0	0	0	0
SPVM _ 2012 _ 11225	SA	2012/07/28	66023				STE CATHERINE O	1	MCGILL COLLEGE		31		11	3	3		13		11	32		1				11	2	0	0	0	19:00:00-19:59:00	2012	0	Dommages matériels inférieurs au seuil de rapportage	Montréal(06)	Montréal (66 )	1	0	0	0	0	0	0	0	0	0	0	0	1
SPVM _ 2012 _ 11226	VE	2012/07/27	66023				COTE DES NEIGES	1	THE BOULEVARD		31		11	3	2		13		13	33		3				11	2	0	0	0	Non précisé	2012	0	Dommages matériels inférieurs au seuil de rapportage	Montréal(06)	Montréal (66 )	2	0	0	0	0	0	0	0	0	0	0	0	0
SPVM _ 2012 _ 11227	LU	2012/07/30	66023				MANSFIELD		STE CATHERINE	50	31		11	1	3		19		11	33		1				11	2	0	0	0	14:00:00-14:59:00	2012	0	Dommages matériels seulement	Montréal(06)	Montréal (66 )	1	0	0	0	0	0	0	0	0	0	0	1	0
SPVM _ 2012 _ 11228	LU	2012/07/30	66023	687			AV DES PINS O		UNIVERSITY	100	31		11	1	3		19		11	99		9			N	11	2	0	0	0	07:00:00-07:59:00	2012	0	Dommages matériels inférieurs au seuil de rapportage	Montréal(06)	Montréal (66 )	2	0	0	0	0	0	0	0	0	0	0	0	0
SPVM _ 2012 _ 11229	MA	2012/07/31	66023					1	GUY ET RENE LEVESQUE		31		11	1	3		13	1	11	32	6	5				11	2	0	0	1	09:00:00-09:59:00	2012	1	Léger	Montréal(06)	Montréal (66 )	1	0	0	0	0	0	0	1	0	0	0	0	0
SPVM _ 2012 _ 1123	SA	2012/12/29	66142	15			BARTON				31		16		2		22										2	0	0	0	Non précisé	2012	0	Dommages matériels seulement	Montréal(06)	Montréal (66 )	1	0	0	0	0	0	0	0	0	0	0	0	1
SPVM _ 2012 _ 11230	MA	2012/07/31	66023				RENE LEVESQUE		BEAVERM HALL	5	31		11	1	3		12		11	33		3				11	2	0	0	0	09:00:00-09:59:00	2012	0	Dommages matériels inférieurs au seuil de rapportage	Montréal(06)	Montréal (66 )	2	0	0	0	0	0	0	0	0	0	0	0	0
SPVM _ 2012 _ 11231	MA	2012/07/31	66023	1206			UNION	2	FACE		31		11	1	3		13		11	33		1				11	2	0	0	0	09:00:00-09:59:00	2012	0	Dommages matériels inférieurs au seuil de rapportage	Montréal(06)	Montréal (66 )	0	0	0	0	0	0	1	0	0	0	0	0	1
SPVM _ 2012 _ 11232	MA	2012/07/31	66023	1196			CAMILLIEN HOUDE				33		11	1	7		13	1	13	33	6	2				11	2	0	0	1	18:00:00-18:59:00	2012	1	Léger	Montréal(06)	Montréal (66 )	1	0	0	0	1	0	0	0	0	0	0	0	0
SPVM _ 2012 _ 11233	ME	2012/08/01	66023				MAISONNEUVE O	1	GUY		32		11	1	3		13		11	33		1				11	1	0	0	0	09:00:00-09:59:00	2012	0	Dommages matériels inférieurs au seuil de rapportage	Montréal(06)	Montréal (66 )	1	0	0	0	0	0	0	0	0	0	0	0	0
SPVM _ 2012 _ 11234	ME	2012/08/01	66023	555			SHERBROOKE O		UNION	50	59		11	1	3		13		11	33		3			E	11	1	0	0	0	07:00:00-07:59:00	2012	0	Dommages matériels inférieurs au seuil de rapportage	Montréal(06)	Montréal (66 )	0	0	0	0	0	0	0	1	0	0	0	0	0
SPVM _ 2012 _ 11235	ME	2012/08/01	66023					1	RENE LEVESQUE O		33		11	1	3		14	1	11	32	6	3				11	2	0	0	1	10:00:00-10:59:00	2012	1	Léger	Montréal(06)	Montréal (66 )	1	0	0	0	1	0	0	0	0	0	0	0	0
SPVM _ 2012 _ 11236	ME	2012/08/01	66023				RENE LEVESQUE	1	ST ALEXANDRE		31		11	1	2		13		11	32		5			N	12	2	0	0	0	11:00:00-11:59:00	2012	0	Dommages matériels seulement	Montréal(06)	Montréal (66 )	2	0	0	0	0	0	0	0	0	0	0	0	0
SPVM _ 2012 _ 11237	VE	2012/07/20	66023				RENE LEVESQUE		DE LA MONTAGNE		31				3		21			33							2	0	0	0	Non précisé	2012	0	Dommages matériels inférieurs au seuil de rapportage	Montréal(06)	Montréal (66 )	1	0	0	0	0	0	0	0	0	0	0	0	1
SPVM _ 2012 _ 11238	ME	2012/08/01	66023								32		11	1	3		19	1	11	32	6	3				11	1	0	0	0	14:00:00-14:59:00	2012	0	Dommages matériels inférieurs au seuil de rapportage	Montréal(06)	Montréal (66 )	1	0	0	0	0	0	0	0	0	0	0	0	0
SPVM _ 2012 _ 11239	MA	2012/07/31	66023				STANLEY	1	SHERBROOKE	50	31		11	1	3		14		13	33		1			S	11	2	0	0	0	05:00:00-05:59:00	2012	0	Dommages matériels inférieurs au seuil de rapportage	Montréal(06)	Montréal (66 )	1	0	0	0	0	0	0	0	0	0	0	1	0
SPVM _ 2012 _ 1124	SA	2012/12/15	66142				SHAKESPEARE	1	HASTING		31		12	2	2		15		11	32		2				14	2	0	0	0	15:00:00-15:59:00	2012	0	Dommages matériels seulement	Montréal(06)	Montréal (66 )	2	0	0	0	0	0	0	0	0	0	0	0	0
SPVM _ 2012 _ 11240	ME	2012/08/01	66023				TERR MTL				31																2	0	0	0	Non précisé	2012	0	Dommages matériels inférieurs au seuil de rapportage	Montréal(06)	Montréal (66 )	1	0	0	0	0	0	0	0	0	0	0	0	1
SPVM _ 2012 _ 11241	ME	2012/08/01	66023				SHERBROOKE O	1	MACKAY		33		12	3	3		13	1	11	32	6	3				11	2	0	0	1	21:00:00-21:59:00	2012	1	Léger	Montréal(06)	Montréal (66 )	1	0	0	0	1	0	0	0	0	0	0	0	0
SPVM _ 2012 _ 11242	ME	2012/08/01	66023				ST MARC	1	STE CATHERINE		31		11	3	3		13		11	32		1				11	2	0	0	0	23:00:00-23:59:00	2012	0	Dommages matériels inférieurs au seuil de rapportage	Montréal(06)	Montréal (66 )	2	0	0	0	0	0	0	0	0	0	0	0	0
SPVM _ 2012 _ 11243	JE	2012/08/02	66023				CRESCENT	1	SHERBROOKE O	20			11	3	3		13		13	33		1			S	11	2	0	0	0	03:00:00-03:59:00	2012	0	Dommages matériels inférieurs au seuil de rapportage	Montréal(06)	Montréal (66 )	1	0	0	0	0	0	0	0	1	0	0	0	0
SPVM _ 2012 _ 11244	JE	2012/08/02	66023	811			BD DE MAISONNEUVE O	2	PRES MC GILL COLLEGE		33		11	1	3		13	1	11	34	6	1				11	2	0	1	0	08:00:00-08:59:00	2012	1	Grave	Montréal(06)	Montréal (66 )	1	0	0	0	1	0	0	0	0	0	0	0	0
SPVM _ 2012 _ 11245	JE	2012/08/02	66023				LUCIEN L ALLIER	1	ST ANTOINE O		31		11	1	3		13	1	11	32	6	1				11	2	0	0	2	13:00:00-13:59:00	2012	2	Léger	Montréal(06)	Montréal (66 )	2	0	0	0	0	0	0	0	0	0	0	0	0
SPVM _ 2012 _ 11246	ME	2012/08/01	66023	614			ST JACQUES O				31		11	1	3		14		11	34		1				11	2	0	0	0	17:00:00-17:59:00	2012	0	Dommages matériels seulement	Montréal(06)	Montréal (66 )	2	0	0	0	0	0	0	0	0	0	0	0	0
SPVM _ 2012 _ 11247	JE	2012/08/02	66023				ST JACQUES	1	MANSFIELD		31		11	3	3		13	1	11	32	10	3				12	2	0	0	1	22:00:00-22:59:00	2012	1	Léger	Montréal(06)	Montréal (66 )	1	0	0	0	0	0	1	0	0	0	0	0	0
SPVM _ 2012 _ 11248	VE	2012/08/03	66023	330			SHERBROOKE O PRES DE				99		11	3	3		13	1	11	32	6	3				11	1	0	0	1	21:00:00-21:59:00	2012	1	Léger	Montréal(06)	Montréal (66 )	0	0	0	0	0	0	1	0	0	0	0	0	0
SPVM _ 2012 _ 11249	SA	2012/08/04	66023				AYLMER	1	SHERBROOKE				11	3	3		13		11	33		1				11	2	0	0	0	03:00:00-03:59:00	2012	0	Dommages matériels inférieurs au seuil de rapportage	Montréal(06)	Montréal (66 )	1	0	0	0	0	0	0	1	0	0	0	0	0
SPVM _ 2012 _ 1125	LU	2012/01/02	66097	325			BD ST JEAN STAT				31		12	1	3		21		11	40		1				11	2	0	0	0	10:00:00-10:59:00	2012	0	Dommages matériels seulement	Montréal(06)	Montréal (66 )	2	0	0	0	0	0	0	0	0	0	0	0	0
SPVM _ 2012 _ 11250	SA	2012/08/04	66023				SHERBROOKE	1	UNIVERSITY	5	33		11	1	3		13	1	11	32	6	3			O	11	2	0	0	1	12:00:00-12:59:00	2012	1	Léger	Montréal(06)	Montréal (66 )	1	0	0	0	1	0	0	0	0	0	0	0	0
SPVM _ 2012 _ 11251	SA	2012/07/28	66023					1	MAISONEUVE O ET METCALFE		33			1	3		13			32		1					2	0	0	1	17:00:00-17:59:00	2012	1	Léger	Montréal(06)	Montréal (66 )	1	0	0	0	1	0	0	0	0	0	0	0	0
SPVM _ 2012 _ 11252	SA	2012/08/04	66023				SHERBROOKE O	1	METCALF		31	9	11	2	3		12		11	32		3				11	2	0	0	0	19:00:00-19:59:00	2012	0	Dommages matériels seulement	Montréal(06)	Montréal (66 )	1	1	0	0	0	0	0	0	0	0	0	0	0
SPVM _ 2012 _ 11253	SA	2012/08/04	66023				CYPRESS	1	PEEL				11	3	3		13		11	33		2				11	2	0	0	0	16:00:00-16:59:00	2012	0	Dommages matériels seulement	Montréal(06)	Montréal (66 )	1	0	0	0	0	0	0	0	0	0	0	0	1
SPVM _ 2012 _ 11254	LU	2012/07/16	66023				DE MAISONNEUVE	1	AYLMER		31			1	3		13			33		1					2	0	0	0	Non précisé	2012	0	Dommages matériels seulement	Montréal(06)	Montréal (66 )	1	0	0	0	0	0	0	0	0	0	0	0	1
SPVM _ 2012 _ 11255	DI	2012/08/05	66023				PEEL	1	ST ANTOINE		33		12	1	3		14	1	11	32	10	3				14	2	0	0	1	18:00:00-18:59:00	2012	1	Léger	Montréal(06)	Montréal (66 )	1	0	0	0	1	0	0	0	0	0	0	0	0
SPVM _ 2012 _ 11256	LU	2012/08/06	66023	951			WILLIAMS	1	L INSPECTEUR	20	31		11	2	2		14		11	33		2			N	11	2	0	0	0	05:00:00-05:59:00	2012	0	Dommages matériels inférieurs au seuil de rapportage	Montréal(06)	Montréal (66 )	0	0	0	0	0	0	0	0	2	0	0	0	0
SPVM _ 2012 _ 11257	LU	2012/08/06	66023				MONTAGNE		STE CATHERINE	75	31				3		13		11	33		2			N		2	0	0	0	Non précisé	2012	0	Dommages matériels seulement	Montréal(06)	Montréal (66 )	1	0	0	0	0	0	0	0	0	0	0	0	1
SPVM _ 2012 _ 11258	SA	2012/08/04	66023				STE CATHERINE	1	GUY		31			1	3		13					1					2	0	0	0	14:00:00-14:59:00	2012	0	Dommages matériels seulement	Montréal(06)	Montréal (66 )	1	0	0	0	0	0	0	0	0	0	0	0	1
SPVM _ 2012 _ 11259	MA	2012/07/31	66023				SHERBROOKE	1	CITY CONCILLOR		33		11	1	3		13	1	11	32	6	3				11	2	0	0	1	17:00:00-17:59:00	2012	1	Léger	Montréal(06)	Montréal (66 )	1	0	0	0	1	0	0	0	0	0	0	0	0
SPVM _ 2012 _ 1126	LU	2012/01/02	66097	6801			TRANSCANADIENNE		ST JEAN		31		11	1	3		21		11	40						11	2	0	0	0	10:00:00-10:59:00	2012	0	Dommages matériels inférieurs au seuil de rapportage	Montréal(06)	Montréal (66 )	1	0	0	0	0	0	0	0	0	0	0	0	1
SPVM _ 2012 _ 11260	MA	2012/08/07	66023	1250			RENE LEVESQUE O				31		11	1	3		13		11	33		3				11	2	0	0	0	Non précisé	2012	0	Dommages matériels inférieurs au seuil de rapportage	Montréal(06)	Montréal (66 )	1	1	0	0	0	0	0	0	0	0	0	0	0
SPVM _ 2012 _ 11261	MA	2012/08/07	66023	1430			DE LA MONTAGNE				31		11	1	3		21		13	99		2				99	3	0	0	0	13:00:00-13:59:00	2012	0	Dommages matériels seulement	Montréal(06)	Montréal (66 )	3	0	0	0	0	0	0	0	0	0	0	0	0
SPVM _ 2012 _ 11262	ME	2012/08/08	66023				OTTAWA	1	PEEL	10	31		11	3	3		12		11	32		1				11	2	0	0	0	Non précisé	2012	0	Dommages matériels seulement	Montréal(06)	Montréal (66 )	1	0	0	0	0	0	0	0	0	0	0	0	1
SPVM _ 2012 _ 11263	ME	2012/08/08	66023	687			AV DES PINS				31		11	1	3		21		11	99						11	2	0	0	0	Non précisé	2012	0	Dommages matériels inférieurs au seuil de rapportage	Montréal(06)	Montréal (66 )	1	0	0	0	0	0	0	0	0	0	0	0	1
SPVM _ 2012 _ 11264	ME	2012/08/08	66023				GUY	1	N-D		31		11	1	3		13		11	34		3			N	11	2	0	0	0	14:00:00-14:59:00	2012	0	Dommages matériels inférieurs au seuil de rapportage	Montréal(06)	Montréal (66 )	1	0	0	0	0	0	0	0	0	0	0	0	1
SPVM _ 2012 _ 11265	JE	2012/08/09	66023				SQUARE VICTORIA	1	ST ANTOINE O		33		11	1	3		19	1	11	32	6	1				11	2	0	0	1	08:00:00-08:59:00	2012	1	Léger	Montréal(06)	Montréal (66 )	1	0	0	0	1	0	0	0	0	0	0	0	0
SPVM _ 2012 _ 11266	LU	2012/08/06	66023				PRINCE	1	WELLINGTON				11	1	3		12		11	32		1				11	2	0	0	0	09:00:00-09:59:00	2012	0	Dommages matériels inférieurs au seuil de rapportage	Montréal(06)	Montréal (66 )	1	0	0	0	1	0	0	0	0	0	0	0	0
SPVM _ 2012 _ 11267	JE	2012/08/09	66023				BLEURY	1	STE CATHERINE O		31		11	1	3		19		11	32		1			O	11	2	0	0	0	12:00:00-12:59:00	2012	0	Dommages matériels inférieurs au seuil de rapportage	Montréal(06)	Montréal (66 )	2	0	0	0	0	0	0	0	0	0	0	0	0
SPVM _ 2012 _ 11268	JE	2012/08/09	66023				STE CATHERINE	1	DE LA MONTAGNE		31				3		13			34		1					2	0	0	0	18:00:00-18:59:00	2012	0	Dommages matériels seulement	Montréal(06)	Montréal (66 )	1	0	0	0	0	0	0	0	0	0	0	0	1
SPVM _ 2012 _ 11269	VE	2012/08/10	66023				UNIVERSITY	1	BD RENE LEVESQUE	20	31		12	1	3		13		14	32		4			N	12	2	0	0	0	09:00:00-09:59:00	2012	0	Dommages matériels inférieurs au seuil de rapportage	Montréal(06)	Montréal (66 )	0	2	0	0	0	0	0	0	0	0	0	0	0
SPVM _ 2012 _ 1127	LU	2012/01/02	66097	10			GLANLYNN	1	BELMONT	200	49		18	2	2		14		11	99					S	12	1	0	0	0	16:00:00-16:59:00	2012	0	Dommages matériels seulement	Montréal(06)	Montréal (66 )	1	0	0	0	0	0	0	0	0	0	0	0	0
SPVM _ 2012 _ 11270	VE	2012/08/10	66023					1	MAISONNEUVE ET PEEL		33		12	1	3		13	1	11	32	6	2			S	14	2	0	0	1	16:00:00-16:59:00	2012	1	Léger	Montréal(06)	Montréal (66 )	1	0	0	0	1	0	0	0	0	0	0	0	0
SPVM _ 2012 _ 11271	VE	2012/08/10	66023				UNIVERSITY	1	STE CATHERINE		31				3		21		11	32							2	0	0	0	Non précisé	2012	0	Dommages matériels inférieurs au seuil de rapportage	Montréal(06)	Montréal (66 )	1	0	0	0	0	0	0	0	0	0	0	0	1
SPVM _ 2012 _ 11272	VE	2012/08/10	66023	2250			GUY FACE A				31		12	3	3		13		13	34		3				14	2	0	0	0	20:00:00-20:59:00	2012	0	Dommages matériels inférieurs au seuil de rapportage	Montréal(06)	Montréal (66 )	2	0	0	0	0	0	0	0	0	0	0	0	0
SPVM _ 2012 _ 11273	SA	2012/08/11	66023				N-D O	1	GUY	15	31		12	3	3		13		11	33		2			O	12	3	0	0	0	00:00:00-00:59:00	2012	0	Dommages matériels seulement	Montréal(06)	Montréal (66 )	3	0	0	0	0	0	0	0	0	0	0	0	0
SPVM _ 2012 _ 11274	VE	2012/08/10	66023				MACKAY	1	BD RENE LEVESQUE	50	31		12	3	3		13		11	33		1			N	12	2	0	0	0	Non précisé	2012	0	Dommages matériels inférieurs au seuil de rapportage	Montréal(06)	Montréal (66 )	1	0	0	0	0	0	0	0	0	0	0	0	1
SPVM _ 2012 _ 11275	DI	2012/08/12	66023	987			DE LA COMMUNE			50	52		11	3	3		14		21	35		1			E	12	1	0	0	0	Non précisé	2012	0	Dommages matériels seulement	Montréal(06)	Montréal (66 )	1	0	0	0	0	0	0	0	0	0	0	0	0
SPVM _ 2012 _ 11276	LU	2012/08/13	66023				DE LA MONTAGNE	1	DR PENFIELD		31		11		3		19		13	32		2				11	2	0	0	0	07:00:00-07:59:00	2012	0	Dommages matériels seulement	Montréal(06)	Montréal (66 )	1	1	0	0	0	0	0	0	0	0	0	0	0
SPVM _ 2012 _ 11277	LU	2012/08/13	66023	3			PL RICHELIEU				31		11	1	2		14		11	99		9				11	2	0	0	0	17:00:00-17:59:00	2012	0	Dommages matériels inférieurs au seuil de rapportage	Montréal(06)	Montréal (66 )	2	0	0	0	0	0	0	0	0	0	0	0	0
SPVM _ 2012 _ 11278	SA	2012/08/11	66023	1400			PINS O				49		11	1	2		22		11	99		9					1	0	0	0	14:00:00-14:59:00	2012	0	Dommages matériels seulement	Montréal(06)	Montréal (66 )	1	0	0	0	0	0	0	0	0	0	0	0	0
SPVM _ 2012 _ 11279	ME	2012/07/04	66023	1234			DE LA MONTAGNE				31				3												2	0	0	0	11:00:00-11:59:00	2012	0	Dommages matériels seulement	Montréal(06)	Montréal (66 )	1	0	0	0	0	0	0	0	0	0	0	0	1
SPVM _ 2012 _ 1128	MA	2012/01/03	66087	10525			COTE DE LIESSE				31	1	11	3	4		11	1	11	34	6	1				11	2	0	0	1	06:00:00-06:59:00	2012	1	Léger	Montréal(06)	Montréal (66 )	1	1	0	0	0	0	0	0	0	0	0	0	0
SPVM _ 2012 _ 11280	LU	2012/08/13	66023				CAMILIEN HOUDE	1	MT ROYAL		59		11	1	3		12	1	13	32	3	4			S	11	1	0	0	1	14:00:00-14:59:00	2012	1	Léger	Montréal(06)	Montréal (66 )	1	0	0	0	0	0	0	0	0	0	0	0	0
SPVM _ 2012 _ 11281	MA	2012/08/14	66023					1	MAISONNEUVE ET MANSFIELD				11	1	3		19		11	32		1				11	2	0	0	0	15:00:00-15:59:00	2012	0	Dommages matériels inférieurs au seuil de rapportage	Montréal(06)	Montréal (66 )	1	0	0	0	1	0	0	0	0	0	0	0	0
SPVM _ 2012 _ 11282	MA	2012/08/14	66023	2120			GUY				31		11	1	3		13		11	33		3				11	2	0	0	0	13:00:00-13:59:00	2012	0	Dommages matériels inférieurs au seuil de rapportage	Montréal(06)	Montréal (66 )	1	0	0	0	0	0	1	0	0	0	0	0	0
SPVM _ 2012 _ 11283	MA	2012/08/14	66023				GUY	1	STE CATHERINE O		32		11	3	3		13	1	11	32	6	1				11	1	0	0	1	23:00:00-23:59:00	2012	1	Léger	Montréal(06)	Montréal (66 )	1	0	0	0	0	0	0	0	0	0	0	0	0
SPVM _ 2012 _ 11284	MA	2012/08/14	66023				SIR WILLIAM OSLER	1	DR PENFIELD	50		9	11	4	2		14		13	33		2			N	12	2	0	0	0	Non précisé	2012	0	Dommages matériels inférieurs au seuil de rapportage	Montréal(06)	Montréal (66 )	1	0	0	0	0	0	0	0	0	0	0	0	1
SPVM _ 2012 _ 11285	ME	2012/08/15	66023				COTE DES NEIGES	1	SHERBROOKE		31		11	1	3		13	1	13	32	6	3				11	2	0	0	2	13:00:00-13:59:00	2012	2	Léger	Montréal(06)	Montréal (66 )	2	0	0	0	0	0	0	0	0	0	0	0	0
SPVM _ 2012 _ 11286	MA	2012/08/14	66023				PRESIDENT KENNEDY	1	UNION		31		11	1	3		13		11	32		2				12	2	0	0	0	Non précisé	2012	0	Dommages matériels inférieurs au seuil de rapportage	Montréal(06)	Montréal (66 )	1	0	0	0	0	0	1	0	0	0	0	0	0
SPVM _ 2012 _ 11287	DI	2012/08/12	66023	2055			PEEL				31		11	1	3		13		11	34		2				12	2	0	0	0	13:00:00-13:59:00	2012	0	Dommages matériels inférieurs au seuil de rapportage	Montréal(06)	Montréal (66 )	1	0	0	0	0	0	0	0	0	0	0	0	1
SPVM _ 2012 _ 11288	ME	2012/08/08	66023	687			AV DES PINS O				31		11	1	9		21		11	99		9				11	2	0	0	0	08:00:00-08:59:00	2012	0	Dommages matériels inférieurs au seuil de rapportage	Montréal(06)	Montréal (66 )	1	0	0	0	0	0	0	0	0	0	0	1	0
SPVM _ 2012 _ 11289	JE	2012/08/16	66023				SHERBROOKE	1	UNIVERSITY		33		11	1	3		13	1	11	32	6	3				11	2	0	0	0	17:00:00-17:59:00	2012	0	Dommages matériels inférieurs au seuil de rapportage	Montréal(06)	Montréal (66 )	1	0	0	0	1	0	0	0	0	0	0	0	0
SPVM _ 2012 _ 1129	MA	2012/01/03	66087	800			LEIGH CAPRIOL				31																2	0	0	0	Non précisé	2012	0	Dommages matériels seulement	Montréal(06)	Montréal (66 )	1	0	0	0	0	0	0	0	0	0	0	0	1
SPVM _ 2012 _ 11290	MA	2012/08/07	66023								31			1	3		21		11							11	2	0	0	0	10:00:00-10:59:00	2012	0	Dommages matériels inférieurs au seuil de rapportage	Montréal(06)	Montréal (66 )	1	0	0	0	0	0	0	0	0	0	0	0	1
SPVM _ 2012 _ 11291	ME	2012/08/15	66023	1155			GUY				31		11		3		21		11	99						99	2	0	0	0	18:00:00-18:59:00	2012	0	Dommages matériels inférieurs au seuil de rapportage	Montréal(06)	Montréal (66 )	1	0	0	0	0	0	0	0	0	0	0	0	1
SPVM _ 2012 _ 11292	JE	2012/08/16	66023					1	UNIVERSITY ET N-D		31		11	3	3		13		11	32		3			E	11	2	0	0	0	23:00:00-23:59:00	2012	0	Dommages matériels seulement	Montréal(06)	Montréal (66 )	2	0	0	0	0	0	0	0	0	0	0	0	0
SPVM _ 2012 _ 11293	VE	2012/08/17	66023	555			DE LA COMMUNE				31		11	3	2		14		11	34		2				11	2	0	0	0	02:00:00-02:59:00	2012	0	Dommages matériels seulement	Montréal(06)	Montréal (66 )	2	0	0	0	0	0	0	0	0	0	0	0	0
SPVM _ 2012 _ 11294	VE	2012/08/17	66023				DE LA MONTAGNE	1	RENE LEVESQUE O		33		11	1	3		19	1	11	34	6	3			N	12	2	0	0	0	16:00:00-16:59:00	2012	0	Dommages matériels inférieurs au seuil de rapportage	Montréal(06)	Montréal (66 )	0	0	0	0	1	0	0	1	0	0	0	0	0
SPVM _ 2012 _ 11295	VE	2012/08/17	66023				UNIVERSITE	1	N-D		31		11	3	3		13		11	32		3				11	2	0	0	0	21:00:00-21:59:00	2012	0	Dommages matériels seulement	Montréal(06)	Montréal (66 )	2	0	0	0	0	0	0	0	0	0	0	0	0
SPVM _ 2012 _ 11296	SA	2012/08/18	66023				ST JACQUES	1	UNIVERSITY	5	31		11	3	3		13		13	32		1			O	11	2	0	0	0	03:00:00-03:59:00	2012	0	Dommages matériels inférieurs au seuil de rapportage	Montréal(06)	Montréal (66 )	1	0	0	0	0	0	0	1	0	0	0	0	0
SPVM _ 2012 _ 11297	ME	2012/08/15	66023	1201			RENE LEVESQUE O	2	SOUS SOL		31		11		3		21		11	99		9				99	2	0	0	0	12:00:00-12:59:00	2012	0	Dommages matériels inférieurs au seuil de rapportage	Montréal(06)	Montréal (66 )	2	0	0	0	0	0	0	0	0	0	0	0	0
SPVM _ 2012 _ 11298	SA	2012/08/18	66023				COTE DES NEIGES	1	BLUERIDGE CRESCENT		31		11	1	2		13		13	33		2			O	11	2	0	0	0	01:00:00-01:59:00	2012	0	Dommages matériels seulement	Montréal(06)	Montréal (66 )	1	0	0	0	0	0	0	0	0	0	0	0	1
SPVM _ 2012 _ 11299	SA	2012/08/18	66023				UNIVERSITY	1	N-D		31		11	1	3		13		11			3				11	2	0	0	0	16:00:00-16:59:00	2012	0	Dommages matériels seulement	Montréal(06)	Montréal (66 )	1	0	0	0	0	0	1	0	0	0	0	0	0
SPVM _ 2012 _ 113	MA	2012/02/28	66023	11851			BD PIERREFONDS				31		11	2	3		21		11	40		9			E	11	2	0	0	0	19:00:00-19:59:00	2012	0	Dommages matériels inférieurs au seuil de rapportage	Montréal(06)	Montréal (66 )	1	0	0	0	0	0	0	0	0	0	0	0	1
SPVM _ 2012 _ 1130	MA	2012/01/03	66097	6801			TRANSCANADIENNE				31		11	1	3		21		11	40		2				12	2	0	0	0	Non précisé	2012	0	Dommages matériels seulement	Montréal(06)	Montréal (66 )	1	0	0	0	0	0	0	0	0	0	0	0	1
SPVM _ 2012 _ 11300	DI	2012/08/12	66023				DE LA MONTAGNE		N-D		31		11	1	2		14		11	33		2				11	2	0	0	0	18:00:00-18:59:00	2012	0	Dommages matériels inférieurs au seuil de rapportage	Montréal(06)	Montréal (66 )	2	0	0	0	0	0	0	0	0	0	0	0	0
SPVM _ 2012 _ 11301	SA	2012/08/18	66023					1	COTE DES NEIGES ET DOCTEUR PENFIEL		50		11	3	2		13	1	13	32	6	5				11	1	0	0	1	04:00:00-04:59:00	2012	1	Léger	Montréal(06)	Montréal (66 )	0	0	0	0	0	1	0	0	0	0	0	0	0
SPVM _ 2012 _ 11302	DI	2012/08/19	66023	420			SHERBROOKE O				31		11	3	3		13		11	33		3				11	2	0	0	0	00:00:00-00:59:00	2012	0	Dommages matériels inférieurs au seuil de rapportage	Montréal(06)	Montréal (66 )	2	0	0	0	0	0	0	0	0	0	0	0	0
SPVM _ 2012 _ 11303	DI	2012/08/19	66023	605			RENE LEVESQUE O				31		11	3	3		13		11	33		3			N	11	2	0	0	0	03:00:00-03:59:00	2012	0	Dommages matériels inférieurs au seuil de rapportage	Montréal(06)	Montréal (66 )	1	0	0	0	0	0	0	0	1	0	0	0	0
SPVM _ 2012 _ 11304	DI	2012/08/19	66023				RENE LEVESQUE O	1	MONTAGNE		31		11	3	3		14		11	32		3				11	2	0	0	0	03:00:00-03:59:00	2012	0	Dommages matériels seulement	Montréal(06)	Montréal (66 )	1	0	0	0	0	0	0	1	0	0	0	0	0
SPVM _ 2012 _ 11305	SA	2012/08/18	66023	3464			DE LA MONTAGNE		SHERBROOKE O	30	31		11	3	3		13		13	34		2			O	11	2	0	0	0	23:00:00-23:59:00	2012	0	Dommages matériels seulement	Montréal(06)	Montréal (66 )	1	0	0	0	0	0	0	0	0	0	0	0	1
SPVM _ 2012 _ 11306	DI	2012/08/19	66023				DE LA MONTAGNE	1	WELLLINGTON	50	31		11	1	3		19		11	34		2			S	11	2	0	0	0	07:00:00-07:59:00	2012	0	Dommages matériels seulement	Montréal(06)	Montréal (66 )	2	0	0	0	0	0	0	0	0	0	0	0	0
SPVM _ 2012 _ 11307	VE	2012/08/17	66023					1	UNION ET CATHCART		31		11	1	3		13		11	32		1				11	2	0	0	0	Non précisé	2012	0	Dommages matériels seulement	Montréal(06)	Montréal (66 )	0	0	0	0	0	0	1	0	0	0	0	0	1
SPVM _ 2012 _ 11308	LU	2012/08/20	66023				SHERBROOKE	1	STANLEY		31		11	1	3		13		11	32		3				11	2	0	0	0	12:00:00-12:59:00	2012	0	Dommages matériels inférieurs au seuil de rapportage	Montréal(06)	Montréal (66 )	1	0	0	0	0	0	0	1	0	0	0	0	0
SPVM _ 2012 _ 11309	LU	2012/08/20	66023				RENE LEVESQUE		UNION	10	31		11	1	3		13		11	33		3				11	2	0	0	0	Non précisé	2012	0	Dommages matériels inférieurs au seuil de rapportage	Montréal(06)	Montréal (66 )	1	0	0	0	0	0	0	0	0	0	0	0	1
SPVM _ 2012 _ 1131	LU	2012/01/02	66097	6801			RTE TRANSCANADIENNE				31			1	3		21									11	2	0	0	0	Non précisé	2012	0	Dommages matériels inférieurs au seuil de rapportage	Montréal(06)	Montréal (66 )	1	0	0	0	0	0	0	0	0	0	0	0	1
SPVM _ 2012 _ 11310	LU	2012/08/20	66023				PRESIDENT KENNEDY	1	CITY COUNCOLLORS		31		11	1	3		13		11	32		1				11	2	0	0	0	08:00:00-08:59:00	2012	0	Dommages matériels seulement	Montréal(06)	Montréal (66 )	1	0	0	0	0	0	0	0	0	0	0	0	1
SPVM _ 2012 _ 11311	MA	2012/08/21	66023					1	PRESIDENT KENNEDY ET MANSFIELD	10	31		11	1	3		13		11	33		2			E	11	2	0	0	0	09:00:00-09:59:00	2012	0	Dommages matériels inférieurs au seuil de rapportage	Montréal(06)	Montréal (66 )	2	0	0	0	0	0	0	0	0	0	0	0	0
SPVM _ 2012 _ 11312	JE	2012/08/16	66023				DE LA MONTAGNE	1	DR PENFIELD		31		11	1	2		13		11	33		2				11	2	0	0	0	Non précisé	2012	0	Dommages matériels inférieurs au seuil de rapportage	Montréal(06)	Montréal (66 )	1	0	0	0	0	0	0	0	0	0	0	0	1
SPVM _ 2012 _ 11313	MA	2012/08/21	66023					1	MANSFIELD ET STE CATHERINE	25			11	1	3		13		11	32		1			N	11	2	0	0	0	Non précisé	2012	0	Dommages matériels inférieurs au seuil de rapportage	Montréal(06)	Montréal (66 )	1	0	0	0	0	0	0	0	0	0	0	0	1
SPVM _ 2012 _ 11314	MA	2012/08/21	66023					1			33		11	1	3		13	1	11	32	6	1				11	2	0	0	1	16:00:00-16:59:00	2012	1	Léger	Montréal(06)	Montréal (66 )	1	0	0	0	1	0	0	0	0	0	0	0	0
SPVM _ 2012 _ 11315	MA	2012/08/21	66023				RENE LEVESQUE	1	GUY		31		11	1	3		13		11	32		3				11	2	0	0	0	17:00:00-17:59:00	2012	0	Dommages matériels seulement	Montréal(06)	Montréal (66 )	2	0	0	0	0	0	0	0	0	0	0	0	0
SPVM _ 2012 _ 11316	MA	2012/08/21	66023	2055			PEEL				49		11		3		21		23								2	0	0	0	18:00:00-18:59:00	2012	0	Dommages matériels inférieurs au seuil de rapportage	Montréal(06)	Montréal (66 )	2	0	0	0	0	0	0	0	0	0	0	0	0
SPVM _ 2012 _ 11317	MA	2012/08/21	66023	1545			DR PENFIELD				31		11	3			14	1	11	99	6	1				11	2	0	0	1	23:00:00-23:59:00	2012	1	Léger	Montréal(06)	Montréal (66 )	2	0	0	0	0	0	0	0	0	0	0	0	0
SPVM _ 2012 _ 11318	MA	2012/08/21	66023				DE LA MONTAGNE	1	RENE LEVESQUE	30			11	3	3		13		11	33		2			N	11	2	0	0	0	21:00:00-21:59:00	2012	0	Dommages matériels seulement	Montréal(06)	Montréal (66 )	1	0	0	0	0	0	0	0	0	0	0	0	1
SPVM _ 2012 _ 11319	ME	2012/08/22	66023				SHERBROOKE O	1	DUROCHER	5	31		11	3	3		13	1	11	32	6	3			O	11	2	0	0	1	00:00:00-00:59:00	2012	1	Léger	Montréal(06)	Montréal (66 )	1	0	0	0	0	0	0	1	0	0	0	0	0
SPVM _ 2012 _ 1132	MA	2012/01/03	66087	755			MTL TOR	2	COTE DE LIESSE		31		12	1	3		19		11	31		1			S	17	2	0	0	0	17:00:00-17:59:00	2012	0	Dommages matériels seulement	Montréal(06)	Montréal (66 )	1	0	0	0	0	0	0	1	0	0	0	0	0
SPVM _ 2012 _ 11320	ME	2012/08/22	66023	1430			LA MONTAGNE	1	MAISONNEUVE	15	31		11	1	3		13		11			1			S	11	2	0	0	0	11:00:00-11:59:00	2012	0	Dommages matériels inférieurs au seuil de rapportage	Montréal(06)	Montréal (66 )	1	1	0	0	0	0	0	0	0	0	0	0	0
SPVM _ 2012 _ 11321	ME	2012/08/22	66023	1196			PEEL				31		11	2	3		13									11	2	0	0	0	17:00:00-17:59:00	2012	0	Dommages matériels inférieurs au seuil de rapportage	Montréal(06)	Montréal (66 )	1	0	0	0	0	0	0	0	0	0	0	0	1
SPVM _ 2012 _ 11322	ME	2012/08/22	66023	1226			DRUMMOND	1	STE CATHERINE O		31		11	1	3		19		11	34		1				11	2	0	0	0	12:00:00-12:59:00	2012	0	Dommages matériels seulement	Montréal(06)	Montréal (66 )	1	0	0	0	0	0	0	0	0	0	0	0	1
SPVM _ 2012 _ 11323	ME	2012/08/22	66023				RENE LEVESQUE	1	MANSFIELD		31		11	1	3		13		11	32		3			N	11	2	0	0	0	14:00:00-14:59:00	2012	0	Dommages matériels seulement	Montréal(06)	Montréal (66 )	2	0	0	0	0	0	0	0	0	0	0	0	0
SPVM _ 2012 _ 11324	DI	2012/07/22	66023	1300			SHERBROOKE O				31		11	1	3		13		11	33		3				11	2	0	0	0	18:00:00-18:59:00	2012	0	Dommages matériels inférieurs au seuil de rapportage	Montréal(06)	Montréal (66 )	2	0	0	0	0	0	0	0	0	0	0	0	0
SPVM _ 2012 _ 11325	ME	2012/08/22	66023				WILLIAM	1	DE LA MONTAGNE		31		11	1	3		19		11	34		1				11	2	0	0	0	Non précisé	2012	0	Dommages matériels seulement	Montréal(06)	Montréal (66 )	1	0	0	0	0	0	0	0	0	0	0	0	1
SPVM _ 2012 _ 11326	ME	2012/08/22	66023				UNIVERSITY	1	RENE LEVESQUE	10	31		11	1	3		13		14	32		2			S	11	2	0	0	0	15:00:00-15:59:00	2012	0	Dommages matériels inférieurs au seuil de rapportage	Montréal(06)	Montréal (66 )	1	0	0	0	0	1	0	0	0	0	0	0	0
SPVM _ 2012 _ 11327	ME	2012/08/22	66023				COTE DES NEIGES	1	DOCTEUR PENFIELD	5	31		11	1	2		12		23	99		3			O	11	2	0	0	0	15:00:00-15:59:00	2012	0	Dommages matériels seulement	Montréal(06)	Montréal (66 )	1	0	0	1	0	0	0	0	0	0	0	0	0
SPVM _ 2012 _ 11328	ME	2012/08/22	66023				RENE LEVESQUE O	1	METCALFE		31		11	1	3		13		11			1			E	11	2	0	0	0	18:00:00-18:59:00	2012	0	Dommages matériels inférieurs au seuil de rapportage	Montréal(06)	Montréal (66 )	2	0	0	0	0	0	0	0	0	0	0	0	0
SPVM _ 2012 _ 11329	JE	2012/08/23	66023	640			ST PAUL	1	ST HENRI	1	31		11	1	3		14		11	33		2				11	2	0	0	0	11:00:00-11:59:00	2012	0	Dommages matériels seulement	Montréal(06)	Montréal (66 )	1	0	0	0	0	0	1	0	0	0	0	0	0
SPVM _ 2012 _ 1133	ME	2012/01/04	66097					1	BD ST JEAN ET SPRINGDALE	100	31		11	1	3		13	1	14	34	6	3			N	11	2	0	0	1	08:00:00-08:59:00	2012	1	Léger	Montréal(06)	Montréal (66 )	2	0	0	0	0	0	0	0	0	0	0	0	0
SPVM _ 2012 _ 11330	JE	2012/08/23	66023					1	N-D ET MCGILL	5	31		11	1	3		13		11	32		1			O	11	2	0	0	0	13:00:00-13:59:00	2012	0	Dommages matériels seulement	Montréal(06)	Montréal (66 )	1	1	0	0	0	0	0	0	0	0	0	0	0
SPVM _ 2012 _ 11331	JE	2012/08/23	66023	381			STE CATHERINE O	1	BLEURY		31		11	1	3		19		11	34		1				11	2	0	0	0	13:00:00-13:59:00	2012	0	Dommages matériels seulement	Montréal(06)	Montréal (66 )	1	0	0	0	0	0	0	1	0	0	0	0	0
SPVM _ 2012 _ 11332	JE	2012/08/23	66023				MC GILL COLLEGE	1	PRESIDENT KENNEDY		31		11	1	5		13		11	32		1			O	11	2	0	0	0	16:00:00-16:59:00	2012	0	Dommages matériels inférieurs au seuil de rapportage	Montréal(06)	Montréal (66 )	2	0	0	0	0	0	0	0	0	0	0	0	0
SPVM _ 2012 _ 11333	JE	2012/08/23	66023				UNIVERSITY		RENE LEVESQUE O		31		11	1	3		13		11	32		3				11	2	0	0	0	16:00:00-16:59:00	2012	0	Dommages matériels seulement	Montréal(06)	Montréal (66 )	1	0	0	0	0	0	0	1	0	0	0	0	0
SPVM _ 2012 _ 11334	ME	2012/08/22	66023				DR PENFIELD	1	DES PINS		31																2	0	0	0	15:00:00-15:59:00	2012	0	Dommages matériels seulement	Montréal(06)	Montréal (66 )	2	0	0	0	0	0	0	0	0	0	0	0	0
SPVM _ 2012 _ 11335	JE	2012/08/23	66023	980			GUY				49		11	1	3		21		11	99		9				11	1	0	0	0	11:00:00-11:59:00	2012	0	Dommages matériels inférieurs au seuil de rapportage	Montréal(06)	Montréal (66 )	0	1	0	0	0	0	0	0	0	0	0	0	0
SPVM _ 2012 _ 11336	JE	2012/08/23	66023				HANSFIELD	1	DE LA GAUCHETIERE O	5	31		11	1	3		13		11	32		1			N	11	2	0	0	0	Non précisé	2012	0	Dommages matériels inférieurs au seuil de rapportage	Montréal(06)	Montréal (66 )	0	0	0	0	0	1	0	0	0	0	0	0	1
SPVM _ 2012 _ 11337	VE	2012/08/24	66023				SHERBROOKE	1	COTE DES NEIGES	1	31		11	3	2		13	1	11	32	6	3			E	11	2	0	0	1	02:00:00-02:59:00	2012	1	Léger	Montréal(06)	Montréal (66 )	2	0	0	0	0	0	0	0	0	0	0	0	0
SPVM _ 2012 _ 11338	VE	2012/08/24	66023	1000			STE CATHERINE O	1	METCALFE	5	72		11	1	3		13	1	11	33	6	1			O	11	2	0	0	2	11:00:00-11:59:00	2012	2	Léger	Montréal(06)	Montréal (66 )	1	0	0	0	0	1	0	0	0	0	0	0	0
SPVM _ 2012 _ 11339	MA	2012/04/24	66023	1176			DE LA MONTAGNE OPP				32		11	1	3		19	1	11	99	9	2				11	1	0	0	1	14:00:00-14:59:00	2012	1	Léger	Montréal(06)	Montréal (66 )	1	0	0	0	0	0	0	0	0	0	0	0	0
SPVM _ 2012 _ 1134	ME	2012/01/04	66097	6381			TRANSCANADIENNE	1	ST JEAN		31		11	1	3		21		11	40						11	2	0	0	0	10:00:00-10:59:00	2012	0	Dommages matériels inférieurs au seuil de rapportage	Montréal(06)	Montréal (66 )	1	0	0	0	0	0	0	0	0	0	0	0	1
SPVM _ 2012 _ 11340	VE	2012/08/24	66023				MANSFIELD	1	ST ANTOINE	6	31		11	1	3		13		11	32		1			N	11	2	0	0	0	Non précisé	2012	0	Dommages matériels inférieurs au seuil de rapportage	Montréal(06)	Montréal (66 )	0	0	0	0	0	1	0	0	0	0	0	1	0
SPVM _ 2012 _ 11341	VE	2012/08/24	66023	2022			STANLEY		DE MAISONNEUVE O	40	31		11	3	3		14		11	33		1			N	11	2	0	0	0	20:00:00-20:59:00	2012	0	Dommages matériels seulement	Montréal(06)	Montréal (66 )	1	1	0	0	0	0	0	0	0	0	0	0	0
SPVM _ 2012 _ 11342	ME	2012/08/22	66023	4005			REDPATH	1	AV DR PENFIELD	20	31		11	3	2		14		13	33		2			S	11	2	0	0	0	23:00:00-23:59:00	2012	0	Dommages matériels inférieurs au seuil de rapportage	Montréal(06)	Montréal (66 )	1	0	0	0	0	0	0	0	0	0	0	0	1
SPVM _ 2012 _ 11343	LU	2012/08/20	66023	1414			DRUMMOND MTL				31		11	1	3		21		11							11	2	0	0	0	17:00:00-17:59:00	2012	0	Dommages matériels inférieurs au seuil de rapportage	Montréal(06)	Montréal (66 )	1	0	0	0	0	0	0	0	0	0	0	0	1
SPVM _ 2012 _ 11344	SA	2012/08/25	66023	3640			DE LA MONTAGNE	1	DR PENFIELD	50	31		11	1	2		14		13	34		2			N	11	2	0	0	0	12:00:00-12:59:00	2012	0	Dommages matériels inférieurs au seuil de rapportage	Montréal(06)	Montréal (66 )	2	0	0	0	0	0	0	0	0	0	0	0	0
SPVM _ 2012 _ 11345	SA	2012/08/25	66023				SQUARE VICTORIA	1	ST ANTOINE O		33		11	1	3		13	1	11	32	5	1				11	2	0	0	1	17:00:00-17:59:00	2012	1	Léger	Montréal(06)	Montréal (66 )	1	0	0	0	1	0	0	0	0	0	0	0	0
SPVM _ 2012 _ 11346	SA	2012/08/25	66023				STE CATHERINE	1	DE LA MONTAGNE	10	31		11	3	3		19		11	33		1			O	11	2	0	0	0	19:00:00-19:59:00	2012	0	Dommages matériels inférieurs au seuil de rapportage	Montréal(06)	Montréal (66 )	1	0	0	0	0	0	0	1	0	0	0	0	0
SPVM _ 2012 _ 11347	DI	2012/08/26	66023	1458			DE LA MONTAGNE	1	DE MAISONNEUVE O	1	33		11	3	3		13		11			2			S	11	2	0	0	0	01:00:00-01:59:00	2012	0	Dommages matériels inférieurs au seuil de rapportage	Montréal(06)	Montréal (66 )	0	0	0	0	1	0	0	1	0	0	0	0	0
SPVM _ 2012 _ 11348	DI	2012/08/26	66023	1196			CAMILIEN HOUDE				31		11	1	7		13		13	99		2				11	2	0	0	0	16:00:00-16:59:00	2012	0	Dommages matériels seulement	Montréal(06)	Montréal (66 )	2	0	0	0	0	0	0	0	0	0	0	0	0
SPVM _ 2012 _ 11349	LU	2012/08/27	66023				SHERBROOKE O	1	UNIVERSITY		31		11	1	3		19		11	32		3				11	2	0	0	0	12:00:00-12:59:00	2012	0	Dommages matériels seulement	Montréal(06)	Montréal (66 )	2	0	0	0	0	0	0	0	0	0	0	0	0
SPVM _ 2012 _ 1135	ME	2012/01/04	66097	123			BORD DU LAC				52		18	1	2		14		11	34		2				17	1	0	0	0	14:00:00-14:59:00	2012	0	Dommages matériels seulement	Montréal(06)	Montréal (66 )	1	0	0	0	0	0	0	0	0	0	0	0	0
SPVM _ 2012 _ 11350	LU	2012/08/20	66023	1455			SHERBROOKE O				31		11	1	2		21		11	99						11	2	0	0	0	12:00:00-12:59:00	2012	0	Dommages matériels seulement	Montréal(06)	Montréal (66 )	1	0	0	0	0	0	0	0	0	0	0	0	1
SPVM _ 2012 _ 11351	LU	2012/08/27	66023				DES PINS O	1	MCTAVISH	40	31		12	1	3		13		13	33		1			O	14	2	0	0	0	17:00:00-17:59:00	2012	0	Dommages matériels inférieurs au seuil de rapportage	Montréal(06)	Montréal (66 )	1	1	0	0	0	0	0	0	0	0	0	0	0
SPVM _ 2012 _ 11352	LU	2012/08/27	66023				UNIVERSITY	1	ST ANTOINE O	3	31		12	1	3		13	1	13	33	6	3				12	2	0	0	1	19:00:00-19:59:00	2012	1	Léger	Montréal(06)	Montréal (66 )	1	0	0	0	0	0	0	1	0	0	0	0	0
SPVM _ 2012 _ 11353	MA	2012/08/28	66023				DUKE	1	OTTAWA		31		11	1	3		19		11	32		1				11	2	0	0	0	07:00:00-07:59:00	2012	0	Dommages matériels seulement	Montréal(06)	Montréal (66 )	0	1	0	1	0	0	0	0	0	0	0	0	0
SPVM _ 2012 _ 11354	SA	2012/08/25	66023				CONCORDE DE LA	1	PRESIDENT KENNEDY		31		11	3	3		13		11	33		2				11	2	0	0	0	19:00:00-19:59:00	2012	0	Dommages matériels seulement	Montréal(06)	Montréal (66 )	1	0	0	0	0	0	0	0	0	0	0	0	1
SPVM _ 2012 _ 11355	MA	2012/08/28	66023				PEEL	1	MAISONNEUVE		31		11	1	3		13		11	34		2				12	2	0	0	0	Non précisé	2012	0	Dommages matériels inférieurs au seuil de rapportage	Montréal(06)	Montréal (66 )	1	0	0	0	0	0	0	0	0	0	0	0	1
SPVM _ 2012 _ 11356	VE	2012/08/24	66023	3777			FACE COTE DES NEIGES				31		11	1	3		19		23	34		2				11	2	0	0	0	20:00:00-20:59:00	2012	0	Dommages matériels seulement	Montréal(06)	Montréal (66 )	1	0	0	1	0	0	0	0	0	0	0	0	0
SPVM _ 2012 _ 11357	MA	2012/08/28	66023				GUY	1	SHERBROOKE O	40	31		11	1	3		13	1	13	33	6	3			S	11	2	0	0	1	18:00:00-18:59:00	2012	1	Léger	Montréal(06)	Montréal (66 )	1	0	0	1	0	0	0	0	0	0	0	0	0
SPVM _ 2012 _ 11358	ME	2012/08/29	66023				SHERBROOKE O	1	CRESCENT		31		11	1	3		14		11	32		3				11	4	0	0	0	11:00:00-11:59:00	2012	0	Dommages matériels inférieurs au seuil de rapportage	Montréal(06)	Montréal (66 )	3	0	0	0	0	0	0	1	0	0	0	0	0
SPVM _ 2012 _ 11359	JE	2012/08/30	66023				DE LA GAUCHETIERE O	1	MANSFIELD	2	31		11	1	3		13		11	32		3			O	11	2	0	0	0	11:00:00-11:59:00	2012	0	Dommages matériels inférieurs au seuil de rapportage	Montréal(06)	Montréal (66 )	1	0	0	0	0	0	1	0	0	0	0	0	0
SPVM _ 2012 _ 1136	ME	2012/01/04	66087	12001			ENGLISH				31		11	1	9		21		11	99		9					2	0	0	0	Non précisé	2012	0	Dommages matériels inférieurs au seuil de rapportage	Montréal(06)	Montréal (66 )	1	0	0	0	0	0	0	0	0	0	0	0	1
SPVM _ 2012 _ 11360	DI	2012/08/26	66023				DE LA MONTAGNE	1	SHERBROOKE O		31		11	3	3		13		11	32		2				11	2	0	0	0	02:00:00-02:59:00	2012	0	Dommages matériels seulement	Montréal(06)	Montréal (66 )	1	0	0	0	0	0	0	1	0	0	0	0	0
SPVM _ 2012 _ 11361	JE	2012/08/30	66023				PEEL	1	OTTAWA		31		11	1	3		13	1	11	32	6	3				11	3	0	0	1	15:00:00-15:59:00	2012	1	Léger	Montréal(06)	Montréal (66 )	2	1	0	0	0	0	0	0	0	0	0	0	0
SPVM _ 2012 _ 11362	JE	2012/08/30	66023				DE LA MONTAGNE		RENE LEVESQUE		33			1	3		12										2	0	0	0	Non précisé	2012	0	Dommages matériels inférieurs au seuil de rapportage	Montréal(06)	Montréal (66 )	1	0	0	0	1	0	0	0	0	0	0	0	0
SPVM _ 2012 _ 11363	LU	2012/08/06	66023				BISHOP	1	STE CATHERINE O	10	31		11	1	3		13		11	34		1				11	2	0	0	0	14:00:00-14:59:00	2012	0	Dommages matériels inférieurs au seuil de rapportage	Montréal(06)	Montréal (66 )	1	0	0	0	0	0	0	0	0	0	0	0	1
SPVM _ 2012 _ 11364	JE	2012/08/30	66023								31		11	1	3		13		13	32		3				11	2	0	0	0	18:00:00-18:59:00	2012	0	Dommages matériels inférieurs au seuil de rapportage	Montréal(06)	Montréal (66 )	2	0	0	0	0	0	0	0	0	0	0	0	0
SPVM _ 2012 _ 11365	JE	2012/08/30	66023	1541			SHERBROOKE	1	GUY		52		11	3	3		13		13	34		3				11	1	0	0	0	19:00:00-19:59:00	2012	0	Dommages matériels seulement	Montréal(06)	Montréal (66 )	1	0	0	0	0	0	0	0	0	0	0	0	0
SPVM _ 2012 _ 11366	VE	2012/08/31	66023				CATHEDRALE	1	GAUCHETIERE		31		11	3	3		13		13	33		1				11	2	0	0	0	00:00:00-00:59:00	2012	0	Dommages matériels seulement	Montréal(06)	Montréal (66 )	2	0	0	0	0	0	0	0	0	0	0	0	0
SPVM _ 2012 _ 11367	VE	2012/08/31	66023	1242			DRUMMOND				31		11	3	3		13		11	32		1				11	2	0	0	0	19:00:00-19:59:00	2012	0	Dommages matériels inférieurs au seuil de rapportage	Montréal(06)	Montréal (66 )	0	0	0	0	0	0	1	0	0	0	0	0	1
SPVM _ 2012 _ 11368	VE	2012/08/31	66023	1235			DE LA MONTAGNE				31		11	3	3		14		11	34		2				11	3	0	0	0	00:00:00-00:59:00	2012	0	Dommages matériels seulement	Montréal(06)	Montréal (66 )	3	0	0	0	0	0	0	0	0	0	0	0	0
SPVM _ 2012 _ 11369	VE	2012/08/31	66023				ST ANTOINE O	1	DE LA MONTAGNE	10	33		11	3	3		13		11	33		1			E	11	2	0	0	0	03:00:00-03:59:00	2012	0	Dommages matériels inférieurs au seuil de rapportage	Montréal(06)	Montréal (66 )	1	0	0	0	1	0	0	0	0	0	0	0	0
SPVM _ 2012 _ 1137	JE	2012/01/05	66087	310			AV DORVAL ARR				31		16	3	3		21		13	40		1				12	2	0	0	0	06:00:00-06:59:00	2012	0	Dommages matériels seulement	Montréal(06)	Montréal (66 )	1	1	0	0	0	0	0	0	0	0	0	0	0
SPVM _ 2012 _ 11370	VE	2012/08/31	66023				METCALFE	1	MAISONNEUVE		31		11	1	3		13		11	32		2				12	2	0	0	0	Non précisé	2012	0	Dommages matériels seulement	Montréal(06)	Montréal (66 )	1	0	0	0	0	0	0	0	0	0	0	0	1
SPVM _ 2012 _ 11371	VE	2012/08/17	66023						DE LA MONTAGNE ET SHERBROOKE O	10			11	1	3		14		11	99		2			O	11	2	0	0	0	15:00:00-15:59:00	2012	0	Dommages matériels inférieurs au seuil de rapportage	Montréal(06)	Montréal (66 )	1	0	0	0	0	0	0	0	0	0	0	0	1
SPVM _ 2012 _ 11372	VE	2012/08/31	66023	629			ST ANTINE O				31		11	1	3		21		11	99		9				11	2	0	0	0	16:00:00-16:59:00	2012	0	Dommages matériels inférieurs au seuil de rapportage	Montréal(06)	Montréal (66 )	2	0	0	0	0	0	0	0	0	0	0	0	0
SPVM _ 2012 _ 11373	VE	2012/08/31	66023				DRUMMOND	1	STE CATHERINE O		31		11	1	3		13		11	32		1				11	2	0	0	0	17:00:00-17:59:00	2012	0	Dommages matériels seulement	Montréal(06)	Montréal (66 )	1	0	0	0	0	0	0	0	0	0	0	1	0
SPVM _ 2012 _ 11374	VE	2012/08/31	66023				DR PENFIELD	2	COTE DES NEIGES	25	31		11	3	2		13		23	33		1			O	11	1	0	0	0	23:00:00-23:59:00	2012	0	Dommages matériels seulement	Montréal(06)	Montréal (66 )	1	0	0	0	0	0	0	0	0	0	0	0	0
SPVM _ 2012 _ 11375	SA	2012/09/01	66023				METCALFE	1	STE CATHERINE O		31		11	3	3		13		11			1				11	1	0	0	0	04:00:00-04:59:00	2012	0	Dommages matériels inférieurs au seuil de rapportage	Montréal(06)	Montréal (66 )	1	0	0	0	0	0	0	0	0	0	0	0	0
SPVM _ 2012 _ 11376	SA	2012/09/01	66023				COTE DES NEIGES	1	CEDAR	4	31		11	1	2		13	1	23	32	6	3			E	11	2	0	0	1	08:00:00-08:59:00	2012	1	Léger	Montréal(06)	Montréal (66 )	2	0	0	0	0	0	0	0	0	0	0	0	0
SPVM _ 2012 _ 11377	SA	2012/09/01	66023				MAISONNEUVE	1	UNION	10	31		11	1	3		13		11	33		1			E	11	2	0	0	0	13:00:00-13:59:00	2012	0	Dommages matériels inférieurs au seuil de rapportage	Montréal(06)	Montréal (66 )	1	0	0	0	0	0	0	0	0	0	0	0	1
SPVM _ 2012 _ 11378	DI	2012/09/02	66023	3730			COTE DES NEIGES				31		11	3	3		13		13			3				11	2	0	0	0	03:00:00-03:59:00	2012	0	Dommages matériels seulement	Montréal(06)	Montréal (66 )	0	0	0	0	0	0	0	1	0	0	0	0	1
SPVM _ 2012 _ 11379	DI	2012/09/02	66023				DE LA COTE DES NEIGES	1	DOCTEUR PENFIELD		31		11	3	3		13		13	33		2				11	2	0	0	0	02:00:00-02:59:00	2012	0	Dommages matériels seulement	Montréal(06)	Montréal (66 )	2	0	0	0	0	0	0	0	0	0	0	0	0
SPVM _ 2012 _ 1138	JE	2012/01/05	66087					1	CARDINAL ET ALBERT DE BIENVILLE		31	1	11	3	3		13	1	11	32	6	3				11	2	0	0	0	17:00:00-17:59:00	2012	0	Dommages matériels seulement	Montréal(06)	Montréal (66 )	2	0	0	0	0	0	0	0	0	0	0	0	0
SPVM _ 2012 _ 11380	LU	2012/09/03	66023				YOUNG	1	WILLIAM	10	31		11	3	3		14		11	33		1				12	2	0	0	0	Non précisé	2012	0	Dommages matériels seulement	Montréal(06)	Montréal (66 )	1	0	0	0	0	0	0	0	0	0	0	0	1
SPVM _ 2012 _ 11381	LU	2012/09/03	66023	537			STE CATHERINE STAT				31		11	1	2		21		11	99		9				11	2	0	0	0	15:00:00-15:59:00	2012	0	Dommages matériels seulement	Montréal(06)	Montréal (66 )	1	1	0	0	0	0	0	0	0	0	0	0	0
SPVM _ 2012 _ 11382	LU	2012/09/03	66023	1100			DE LA MONTAGNE			5			11	3	3		13		11	32		3			S	11	3	0	0	0	22:00:00-22:59:00	2012	0	Dommages matériels seulement	Montréal(06)	Montréal (66 )	2	0	0	0	0	0	0	1	0	0	0	0	0
SPVM _ 2012 _ 11383	MA	2012/09/04	66023	2044			METCALFE				31		11	1	3		13		11	33		1				11	2	0	0	0	09:00:00-09:59:00	2012	0	Dommages matériels inférieurs au seuil de rapportage	Montréal(06)	Montréal (66 )	1	0	0	0	0	1	0	0	0	0	0	0	0
SPVM _ 2012 _ 11384	MA	2012/09/04	66023	2115			MONTAGNE				31		11	1	3		14		13	33		2				11	2	0	0	0	11:00:00-11:59:00	2012	0	Dommages matériels inférieurs au seuil de rapportage	Montréal(06)	Montréal (66 )	1	1	0	0	0	0	0	0	0	0	0	0	0
SPVM _ 2012 _ 11385	MA	2012/09/04	66023	1455			PEEL				31		11	1	3		21									12	2	0	0	0	13:00:00-13:59:00	2012	0	Dommages matériels inférieurs au seuil de rapportage	Montréal(06)	Montréal (66 )	1	0	0	0	0	0	0	0	0	0	0	0	1
SPVM _ 2012 _ 11386	MA	2012/09/04	66023	1100			DE LA MONTAGNE			5			11	3	3		13		11	32		3			S	11	3	0	0	0	22:00:00-22:59:00	2012	0	Dommages matériels seulement	Montréal(06)	Montréal (66 )	2	0	0	0	0	0	0	1	0	0	0	0	0
SPVM _ 2012 _ 11387	ME	2012/09/05	66023				MONTAGNE	1	ST ANTOINE O		32		12	3	3		13	1	11	32	6	2				12	1	0	0	1	05:00:00-05:59:00	2012	1	Léger	Montréal(06)	Montréal (66 )	1	0	0	0	0	0	0	0	0	0	0	0	0
SPVM _ 2012 _ 11388	JE	2012/09/06	66023				PEEL	1	RENE LEVESQUE	5	31		11	1	3		13		11	33		2			N	11	2	0	0	0	12:00:00-12:59:00	2012	0	Dommages matériels seulement	Montréal(06)	Montréal (66 )	2	0	0	0	0	0	0	0	0	0	0	0	0
SPVM _ 2012 _ 11389	ME	2012/09/05	66023	3470			STANLEY F				31			3	2				13	34		1				12	2	0	0	0	23:00:00-23:59:00	2012	0	Dommages matériels seulement	Montréal(06)	Montréal (66 )	1	0	0	0	0	0	0	0	0	0	0	0	1
SPVM _ 2012 _ 1139	ME	2012/01/04	66087	1895			ST FRANCOIS				31		11	1	3		21		11	99						11	2	0	0	0	06:00:00-06:59:00	2012	0	Dommages matériels inférieurs au seuil de rapportage	Montréal(06)	Montréal (66 )	1	0	0	0	0	0	0	0	0	0	0	0	1
SPVM _ 2012 _ 11390	VE	2012/09/07	66023				RENE LEVESQUE		BISHOP	100	31		11	2	3		13		11						N	11	2	0	0	0	Non précisé	2012	0	Dommages matériels inférieurs au seuil de rapportage	Montréal(06)	Montréal (66 )	1	0	0	0	0	0	0	0	0	0	0	0	1
SPVM _ 2012 _ 11391	VE	2012/09/07	66023	1215			MANSFIELD	1	STE CATHERINE	60	31		11	1	3		13		11	33		1			S	12	2	0	0	0	09:00:00-09:59:00	2012	0	Dommages matériels inférieurs au seuil de rapportage	Montréal(06)	Montréal (66 )	0	1	0	0	0	0	1	0	0	0	0	0	0
SPVM _ 2012 _ 11392	VE	2012/09/07	66023				RENE LEVESQUE O	1	LUCIEN L ALLIER	10	31		11	2	3		13	1	11	33	6	3			E	11	4	0	0	1	19:00:00-19:59:00	2012	1	Léger	Montréal(06)	Montréal (66 )	3	0	0	0	0	0	0	0	1	0	0	0	0
SPVM _ 2012 _ 11393	VE	2012/09/07	66023	1432			CRESCENT	2	FACE		33		11	3	3		13	1	11	34	6	1			E	11	2	0	0	1	22:00:00-22:59:00	2012	1	Léger	Montréal(06)	Montréal (66 )	1	0	0	0	1	0	0	0	0	0	0	0	0
SPVM _ 2012 _ 11394	SA	2012/09/08	66023				STE CATHERINE O	1	UNIVERSITY	1	31		11	3	3		13		11	32		1			O	11	2	0	0	0	02:00:00-02:59:00	2012	0	Dommages matériels inférieurs au seuil de rapportage	Montréal(06)	Montréal (66 )	2	0	0	0	0	0	0	0	0	0	0	0	0
SPVM _ 2012 _ 11395	DI	2012/09/09	66023	1118			CRESCENT				31		11	3	3		13		11			1				11	2	0	0	0	01:00:00-01:59:00	2012	0	Dommages matériels seulement	Montréal(06)	Montréal (66 )	2	0	0	0	0	0	0	0	0	0	0	0	0
SPVM _ 2012 _ 11396	DI	2012/09/09	66023				ST JACQUES O	1	UNIVERSITY	20	31		11	1	3		13		11	33		1			E	11	2	0	0	0	10:00:00-10:59:00	2012	0	Dommages matériels seulement	Montréal(06)	Montréal (66 )	1	0	0	0	0	0	0	1	0	0	0	0	0
SPVM _ 2012 _ 11397	SA	2012/09/08	66023	1420					DE LA MONTAGNE		31		11	3	3		13		13	33		2			N	12	2	0	0	0	23:00:00-23:59:00	2012	0	Dommages matériels inférieurs au seuil de rapportage	Montréal(06)	Montréal (66 )	2	0	0	0	0	0	0	0	0	0	0	0	0
SPVM _ 2012 _ 11398	MA	2012/09/04	66023				MCGILL		N-D		31		12	3	3		13		11	32		2				14	2	0	0	0	23:00:00-23:59:00	2012	0	Dommages matériels seulement	Montréal(06)	Montréal (66 )	1	0	0	0	0	0	0	1	0	0	0	0	0
SPVM _ 2012 _ 11399	VE	2012/09/07	66023	1232			DE LA MONTAGNE				31		11	1	3		13		11	34		1				11	2	0	0	0	Non précisé	2012	0	Dommages matériels inférieurs au seuil de rapportage	Montréal(06)	Montréal (66 )	1	0	1	0	0	0	0	0	0	0	0	0	0
SPVM _ 2012 _ 114	JE	2012/03/01	66023				GOUIN O	1	SUNNYBROOKE		40		16	2	2		13		11	32		3				17	1	0	0	0	06:00:00-06:59:00	2012	0	Dommages matériels seulement	Montréal(06)	Montréal (66 )	1	0	0	0	0	0	0	0	0	0	0	0	0
SPVM _ 2012 _ 1140	VE	2012/01/06	66087					1	AV DORVAL ET CARSON		59		17	1	3		13		11	32		3				17	2	0	0	0	07:00:00-07:59:00	2012	0	Dommages matériels seulement	Montréal(06)	Montréal (66 )	1	1	0	0	0	0	0	0	0	0	0	0	0
SPVM _ 2012 _ 11400	MA	2012/09/11	66023	3421			DRUMMOND				33		11	1	2		14		13	34		2				11	2	0	0	0	15:00:00-15:59:00	2012	0	Dommages matériels inférieurs au seuil de rapportage	Montréal(06)	Montréal (66 )	1	0	0	0	1	0	0	0	0	0	0	0	0
SPVM _ 2012 _ 11401	ME	2012/09/12	66023	1550			METCALFE	1	DE MAISONNEUVE O	20	31		11	1	3		13		11	33		1			S	11	2	0	0	0	Non précisé	2012	0	Dommages matériels inférieurs au seuil de rapportage	Montréal(06)	Montréal (66 )	1	0	0	0	0	0	1	0	0	0	0	0	0
SPVM _ 2012 _ 11402	MA	2012/09/11	66023				BRENNAN				31		11	1	3		21		11	99		9				11	2	0	0	0	15:00:00-15:59:00	2012	0	Dommages matériels inférieurs au seuil de rapportage	Montréal(06)	Montréal (66 )	1	0	0	0	0	0	0	0	0	0	0	0	1
SPVM _ 2012 _ 11403	ME	2012/09/12	66023	147			ATWATER				31		11	1	3		21		11	40		9				11	2	0	0	0	16:00:00-16:59:00	2012	0	Dommages matériels inférieurs au seuil de rapportage	Montréal(06)	Montréal (66 )	1	0	0	0	0	0	0	0	0	0	0	0	1
SPVM _ 2012 _ 11404	ME	2012/09/12	66023				SHERBROOKE O	1	MCTAVISH		99		11	1	3		13		11	32		3				11	3	0	0	0	16:00:00-16:59:00	2012	0	Dommages matériels inférieurs au seuil de rapportage	Montréal(06)	Montréal (66 )	2	0	0	0	0	0	1	0	0	0	0	0	0
SPVM _ 2012 _ 11405	ME	2012/09/12	66023				DE LA MONTAGNE	1	N-D		31		11	1	3		13		11	32		3			E	11	2	0	0	0	Non précisé	2012	0	Dommages matériels inférieurs au seuil de rapportage	Montréal(06)	Montréal (66 )	1	0	0	0	0	0	0	0	0	0	0	0	1
SPVM _ 2012 _ 11406	SA	2012/09/01	66023	1			PL VILLE MARIE				31		11		3												2	0	0	0	12:00:00-12:59:00	2012	0	Dommages matériels inférieurs au seuil de rapportage	Montréal(06)	Montréal (66 )	1	0	0	0	0	0	0	0	0	0	0	0	1
SPVM _ 2012 _ 11407	JE	2012/09/13	66023				AYLMER	1	MAISONNEUVE		31		11	3	3		13	1	11	32	6	1				11	2	0	0	2	00:00:00-00:59:00	2012	2	Léger	Montréal(06)	Montréal (66 )	1	0	0	0	0	0	0	1	0	0	0	0	0
SPVM _ 2012 _ 11408	JE	2012/09/13	66023				RENE LEVESQUE	1	DRUMMOND	20	31		11	1	3		13		11	33		3			O	11	2	0	0	0	07:00:00-07:59:00	2012	0	Dommages matériels seulement	Montréal(06)	Montréal (66 )	1	0	0	0	0	0	0	0	1	0	0	0	0
SPVM _ 2012 _ 11409	JE	2012/09/13	66023	1170			PL PHILLIPS F				31		11	1	3		13	1	11	34	6	3				11	2	0	0	1	08:00:00-08:59:00	2012	1	Léger	Montréal(06)	Montréal (66 )	1	0	0	0	0	0	1	0	0	0	0	0	0
SPVM _ 2012 _ 1141	VE	2012/01/06	66097				BD DES SOURCES	1	HYMUS	50	31		15	1	3		13		11	33		3			N	12	2	0	0	0	13:00:00-13:59:00	2012	0	Dommages matériels seulement	Montréal(06)	Montréal (66 )	1	0	0	0	0	0	0	0	0	0	0	0	1
SPVM _ 2012 _ 11410	JE	2012/09/06	66023				PRES BARRE		DE LA MONTAGNE				11	1	3		13		11	34		1				11	2	0	0	0	10:00:00-10:59:00	2012	0	Dommages matériels inférieurs au seuil de rapportage	Montréal(06)	Montréal (66 )	1	0	0	0	0	0	0	0	0	0	0	0	1
SPVM _ 2012 _ 11411	JE	2012/09/13	66023				DRUMMOND	1	MAISONNEUVE	5	31		11	1			13	1	11	32	6	1			S	11	2	0	0	1	10:00:00-10:59:00	2012	1	Léger	Montréal(06)	Montréal (66 )	1	0	0	0	0	0	0	1	0	0	0	0	0
SPVM _ 2012 _ 11412	JE	2012/09/13	66023	2120			GUY	1	DE MAISONNEUVE	25	33		11	1	3		12	1	11	33	6	3			S	11	2	0	0	1	12:00:00-12:59:00	2012	1	Léger	Montréal(06)	Montréal (66 )	1	0	0	0	1	0	0	0	0	0	0	0	0
SPVM _ 2012 _ 11413	JE	2012/09/13	66023				GUY	1	STE CATHERINE O	15	31		11	1	3		13		11	33		2			S	11	2	0	0	0	14:00:00-14:59:00	2012	0	Dommages matériels inférieurs au seuil de rapportage	Montréal(06)	Montréal (66 )	2	0	0	0	0	0	0	0	0	0	0	0	0
SPVM _ 2012 _ 11414	JE	2012/09/13	66023				ST ANTOINE	1	LUCIEN LALLIER		31		11	1	2		13		11	32		1				11	2	0	0	0	16:00:00-16:59:00	2012	0	Dommages matériels seulement	Montréal(06)	Montréal (66 )	2	0	0	0	0	0	0	0	0	0	0	0	0
SPVM _ 2012 _ 11415	JE	2012/09/13	66023	625			PRESIDENT KENNEDY	1	UNIVERSITY	30	31	1	11	3	3		13	1	11	33	6	2			E	11	2	0	0	0	19:00:00-19:59:00	2012	0	Dommages matériels seulement	Montréal(06)	Montréal (66 )	2	0	0	0	0	0	0	0	0	0	0	0	0
SPVM _ 2012 _ 11416	JE	2012/09/13	66023				MCDOUGALL	1	TRAFALGAR	50	43		11	3	2		12	1	22	34	6	1			E	11	1	0	0	0	21:00:00-21:59:00	2012	0	Dommages matériels seulement	Montréal(06)	Montréal (66 )	0	0	0	0	0	0	0	1	0	0	0	0	0
SPVM _ 2012 _ 11417	VE	2012/09/14	66023					1	PEEL ET CYPRESS				11	3			13		11	32		2				11	2	0	0	0	23:00:00-23:59:00	2012	0	Dommages matériels seulement	Montréal(06)	Montréal (66 )	1	0	0	0	0	0	0	0	0	0	0	0	1
SPVM _ 2012 _ 11418	VE	2012/09/14	66023	1430			DE LA MONTAGNE				31		11	3	3		13		11	33		2			E	11	2	0	0	0	01:00:00-01:59:00	2012	0	Dommages matériels inférieurs au seuil de rapportage	Montréal(06)	Montréal (66 )	1	0	0	0	0	0	0	0	0	0	0	0	1
SPVM _ 2012 _ 11419	VE	2012/09/14	66023				DE L INSPECTEUR	1	ST PAUL		31		11	1	3		12		11	32		2				11	2	0	0	0	08:00:00-08:59:00	2012	0	Dommages matériels inférieurs au seuil de rapportage	Montréal(06)	Montréal (66 )	0	0	0	0	0	0	0	0	2	0	0	0	0
SPVM _ 2012 _ 1142	JE	2012/01/05	66097	6801			TRANSCANADIENNE				31		16	1	3		21		11							17	2	0	0	0	10:00:00-10:59:00	2012	0	Dommages matériels inférieurs au seuil de rapportage	Montréal(06)	Montréal (66 )	1	0	0	0	0	0	0	0	0	0	0	0	1
SPVM _ 2012 _ 11420	JE	2012/09/13	66023				CRESCENT	1	RENE LEVESQUE	30	31				3		13			33		1			N	11	2	0	0	0	Non précisé	2012	0	Dommages matériels inférieurs au seuil de rapportage	Montréal(06)	Montréal (66 )	1	0	0	0	0	0	0	0	0	0	0	0	1
SPVM _ 2012 _ 11421	JE	2012/09/13	66023				CRESCENT		RENE LEVESQUE	30	31				3		13			33		1			N	11	2	0	0	0	Non précisé	2012	0	Dommages matériels inférieurs au seuil de rapportage	Montréal(06)	Montréal (66 )	1	0	0	0	0	0	0	0	0	0	0	0	1
SPVM _ 2012 _ 11422	VE	2012/09/14	66023				CH COTE DES NEIGES	1	AV SELKIRK	5	39		11	1	2		13	1	23	32	6	1			O	11	1	0	0	1	09:00:00-09:59:00	2012	1	Léger	Montréal(06)	Montréal (66 )	1	0	0	0	0	0	0	0	0	0	0	0	0
SPVM _ 2012 _ 11423	VE	2012/09/14	66023				STANLEY	1	CYPRESS		31		11	1	3		14		11	32		1				11	2	0	0	0	12:00:00-12:59:00	2012	0	Dommages matériels inférieurs au seuil de rapportage	Montréal(06)	Montréal (66 )	1	1	0	0	0	0	0	0	0	0	0	0	0
SPVM _ 2012 _ 11424	JE	2012/09/13	66023	1440			DE LA MONTAGNE	1	STE CATHERINE	100	31		11	1	3		21		11	99		4			S	11	2	0	0	0	13:00:00-13:59:00	2012	0	Dommages matériels seulement	Montréal(06)	Montréal (66 )	2	0	0	0	0	0	0	0	0	0	0	0	0
SPVM _ 2012 _ 11425	VE	2012/09/14	66023	895			DE LA GAUCHETIERE	1	UNIVERSITE	30	31		11		3		21		11	99		9			O	99	2	0	0	0	15:00:00-15:59:00	2012	0	Dommages matériels inférieurs au seuil de rapportage	Montréal(06)	Montréal (66 )	2	0	0	0	0	0	0	0	0	0	0	0	0
SPVM _ 2012 _ 11426	VE	2012/09/14	66023				MONTAGNE DE LA	1	STE CATHERINE		31		12	3	3		13		11	32		2				14	2	0	0	0	09:00:00-09:59:00	2012	0	Dommages matériels seulement	Montréal(06)	Montréal (66 )	2	0	0	0	0	0	0	0	0	0	0	0	0
SPVM _ 2012 _ 11427	SA	2012/09/15	66023				PEEL	1	ST ANTOINE		33		12	3	3		13	1	13	32	6	3				14	2	0	0	1	00:00:00-00:59:00	2012	1	Léger	Montréal(06)	Montréal (66 )	1	0	0	0	1	0	0	0	0	0	0	0	0
SPVM _ 2012 _ 11428	SA	2012/09/15	66023				DOCTEUR PENFIELD	1	COTE DES NEIGES		31		12	3			13	1	13	32	6	1				14	2	0	0	2	02:00:00-02:59:00	2012	2	Léger	Montréal(06)	Montréal (66 )	2	0	0	0	0	0	0	0	0	0	0	0	0
SPVM _ 2012 _ 11429	SA	2012/09/15	66023				MONTAGNE	1	TORRENCE		44	9	12	4	3		13		11	99		1				14	1	0	0	0	02:00:00-02:59:00	2012	0	Dommages matériels seulement	Montréal(06)	Montréal (66 )	1	0	0	0	0	0	0	0	0	0	0	0	0
SPVM _ 2012 _ 1143	VE	2012/01/06	66097	1701			DES SOURCES			100	75		12	1	3		13	1	21	34	6	5			S	12	1	0	0	2	16:00:00-16:59:00	2012	2	Léger	Montréal(06)	Montréal (66 )	1	0	0	0	0	0	0	0	0	0	0	0	0
SPVM _ 2012 _ 11430	SA	2012/09/15	66023	1			PL VILLE MARIE				31		11	1	9		21		11	99						99	2	0	0	0	11:00:00-11:59:00	2012	0	Dommages matériels inférieurs au seuil de rapportage	Montréal(06)	Montréal (66 )	2	0	0	0	0	0	0	0	0	0	0	0	0
SPVM _ 2012 _ 11431	VE	2012/09/14	66023				SHERBROOKE E	1	PAPINEAU		31		11	3	2		14	1	11	32	6	3				11	2	0	0	0	21:00:00-21:59:00	2012	0	Dommages matériels inférieurs au seuil de rapportage	Montréal(06)	Montréal (66 )	1	0	0	0	0	0	0	1	0	0	0	0	0
SPVM _ 2012 _ 11432	VE	2012/09/14	66023	1927			TUPPER				31		11	1	2		14		11	99		1				11	2	0	0	0	08:00:00-08:59:00	2012	0	Dommages matériels seulement	Montréal(06)	Montréal (66 )	1	0	0	0	0	0	0	0	0	0	0	1	0
SPVM _ 2012 _ 11433	SA	2012/09/15	66023				CAMILIEN HOUDE	1	BD MT ROYAL	300	31		11	1	7		13		13	34		2				11	2	0	0	0	09:00:00-09:59:00	2012	0	Dommages matériels inférieurs au seuil de rapportage	Montréal(06)	Montréal (66 )	1	0	0	0	0	0	0	0	0	0	0	0	1
SPVM _ 2012 _ 11434	DI	2012/09/16	66023				STE CATHERINE		MACKAY		31		11	3	3		13		11	32		1				11	2	0	0	0	02:00:00-02:59:00	2012	0	Dommages matériels seulement	Montréal(06)	Montréal (66 )	1	0	0	0	0	0	0	1	0	0	0	0	0
SPVM _ 2012 _ 11435	DI	2012/09/16	66023	1110			N-D	1	PEEL	20	31		11	1	3		13		11	33		3			O	11	2	0	0	0	Non précisé	2012	0	Dommages matériels inférieurs au seuil de rapportage	Montréal(06)	Montréal (66 )	2	0	0	0	0	0	0	0	0	0	0	0	0
SPVM _ 2012 _ 11436	SA	2012/09/15	66023	1425			RENE LEVESQUE	1	BISHOP	10	31		11	1	3		13	1	11	33	6	3			O	11	3	0	0	1	16:00:00-16:59:00	2012	1	Léger	Montréal(06)	Montréal (66 )	2	0	0	0	0	0	1	0	0	0	0	0	0
SPVM _ 2012 _ 11437	SA	2012/09/15	66023	3980			CH DE LA COTE DES NEIGES				99		11	1	2		21	1	11	99	10	9				99	1	0	0	1	18:00:00-18:59:00	2012	1	Léger	Montréal(06)	Montréal (66 )	1	0	0	0	0	0	0	0	0	0	0	0	0
SPVM _ 2012 _ 11438	LU	2012/09/17	66023					1	WILLIAM ET DUKE		32		11	1	1		13	1	11		6	1				12	1	0	0	1	08:00:00-08:59:00	2012	1	Léger	Montréal(06)	Montréal (66 )	0	0	0	1	0	0	0	0	0	0	0	0	0
SPVM _ 2012 _ 11439	LU	2012/09/17	66023				GUY	1	ARGYLE		59		11	1	3		13		13	32		2				11	1	0	0	0	10:00:00-10:59:00	2012	0	Dommages matériels seulement	Montréal(06)	Montréal (66 )	0	1	0	0	0	0	0	0	0	0	0	0	0
SPVM _ 2012 _ 1144	SA	2012/01/07	66097	6801			TRANSCANADIENNE						12	1	3		21		11	40		2				17	2	0	0	0	14:00:00-14:59:00	2012	0	Dommages matériels inférieurs au seuil de rapportage	Montréal(06)	Montréal (66 )	2	0	0	0	0	0	0	0	0	0	0	0	0
SPVM _ 2012 _ 11440	LU	2012/09/17	66023					1	CRESCENT ET MAISONNEUVE				11	1	3		13		11	33		1				11	2	0	0	0	11:00:00-11:59:00	2012	0	Dommages matériels inférieurs au seuil de rapportage	Montréal(06)	Montréal (66 )	1	0	0	0	0	0	0	0	0	0	0	1	0
SPVM _ 2012 _ 11441	LU	2012/09/17	66023	1115			SHERBROOKE O	1	PEEL	20	33		11	1	3		13		11	33		3			O	11	2	0	0	0	12:00:00-12:59:00	2012	0	Dommages matériels inférieurs au seuil de rapportage	Montréal(06)	Montréal (66 )	1	0	0	0	1	0	0	0	0	0	0	0	0
SPVM _ 2012 _ 11442	LU	2012/09/17	66023				SHERBROOKE	1	UNIVERSITY	6	31		11	1	3		13		11	33		2			O	11	2	0	0	0	12:00:00-12:59:00	2012	0	Dommages matériels inférieurs au seuil de rapportage	Montréal(06)	Montréal (66 )	1	0	0	0	0	0	0	0	0	0	0	0	1
SPVM _ 2012 _ 11443	MA	2012/09/18	66023				ST JACQUES	1	MANSFIELD		31		12	1	3		13		11	32		3				14	2	0	0	0	15:00:00-15:59:00	2012	0	Dommages matériels inférieurs au seuil de rapportage	Montréal(06)	Montréal (66 )	1	0	0	1	0	0	0	0	0	0	0	0	0
SPVM _ 2012 _ 11444	MA	2012/09/18	66023				METCALFE	1	STE CATHERINE	30	31		12	1	3		13		13	33		1			N	14	2	0	0	0	15:00:00-15:59:00	2012	0	Dommages matériels inférieurs au seuil de rapportage	Montréal(06)	Montréal (66 )	1	1	0	0	0	0	0	0	0	0	0	0	0
SPVM _ 2012 _ 11445	ME	2012/09/19	66023				UNIVERSITY	1	CATHCART		40		11	1	3		13	1	11	32	6	2			O	11	1	0	0	0	06:00:00-06:59:00	2012	0	Dommages matériels seulement	Montréal(06)	Montréal (66 )	0	0	0	0	0	0	0	1	0	0	0	0	0
SPVM _ 2012 _ 11446	ME	2012/09/19	66023					1	WILLIAM ET LA MONTAGNE		31		11	1	3		14		11	33		1				11	2	0	0	0	13:00:00-13:59:00	2012	0	Dommages matériels seulement	Montréal(06)	Montréal (66 )	1	1	0	0	0	0	0	0	0	0	0	0	0
SPVM _ 2012 _ 11447	ME	2012/09/19	66023	1400			RENE LEVESQUE				31		11	1	3		21		11							11	2	0	0	0	13:00:00-13:59:00	2012	0	Dommages matériels inférieurs au seuil de rapportage	Montréal(06)	Montréal (66 )	1	0	0	0	0	0	0	0	0	0	0	0	1
SPVM _ 2012 _ 11448	JE	2012/09/20	66023				WILLIAM	1	MURRAY		31		11	1	3		13		11	33		1				11	2	0	0	0	10:00:00-10:59:00	2012	0	Dommages matériels seulement	Montréal(06)	Montréal (66 )	2	0	0	0	0	0	0	0	0	0	0	0	0
SPVM _ 2012 _ 11449	JE	2012/09/20	66023				PEEL	1	DES PINS	20	31		11	1	1		13		13	33		2			S	11	2	0	0	0	11:00:00-11:59:00	2012	0	Dommages matériels inférieurs au seuil de rapportage	Montréal(06)	Montréal (66 )	2	0	0	0	0	0	0	0	0	0	0	0	0
SPVM _ 2012 _ 1145	SA	2012/01/07	66097	2160			TRANSCANADIENNE VOIE SERV E	2	BD SOURCES VIAD	100	31		15	1	3		11		11	33		1			E	17	2	0	0	0	15:00:00-15:59:00	2012	0	Dommages matériels seulement	Montréal(06)	Montréal (66 )	1	1	0	0	0	0	0	0	0	0	0	0	0
SPVM _ 2012 _ 11450	JE	2012/09/20	66023					1	UNIVERSITY ET DES PINS O	20	31		11	1	3		13		13	33		2			N	11	2	0	0	0	12:00:00-12:59:00	2012	0	Dommages matériels seulement	Montréal(06)	Montréal (66 )	2	0	0	0	0	0	0	0	0	0	0	0	0
SPVM _ 2012 _ 11451	LU	2012/09/10	66023				GUY	1	RENE LEVESQUE		33		11	3	3		13		11	32		3				11	2	0	0	0	22:00:00-22:59:00	2012	0	Dommages matériels inférieurs au seuil de rapportage	Montréal(06)	Montréal (66 )	1	0	0	0	1	0	0	0	0	0	0	0	0
SPVM _ 2012 _ 11452	JE	2012/09/20	66023	980			GUY				50		11	3	3		21		11	99		9				11	1	0	0	0	00:00:00-00:59:00	2012	0	Dommages matériels inférieurs au seuil de rapportage	Montréal(06)	Montréal (66 )	0	0	0	0	0	0	0	0	1	0	0	0	0
SPVM _ 2012 _ 11453	VE	2012/09/21	66023					2	MACKAY		31		11	3	3		13		11	33		5				11	3	0	0	0	00:00:00-00:59:00	2012	0	Dommages matériels seulement	Montréal(06)	Montréal (66 )	3	0	0	0	0	0	0	0	0	0	0	0	0
SPVM _ 2012 _ 11454	VE	2012/09/21	66023				REMEMBRANCE	1	CAMILIEN HOUDE	10	33		11	1	3		13		11	33		9			O	11	2	0	0	1	13:00:00-13:59:00	2012	1	Léger	Montréal(06)	Montréal (66 )	1	0	0	0	1	0	0	0	0	0	0	0	0
SPVM _ 2012 _ 11455	VE	2012/09/21	66023	3600			UNIVERSITY	1	PRINCE ARTHUR	30	31		11	1	1		13		13	33		1			S	12	2	0	0	0	15:00:00-15:59:00	2012	0	Dommages matériels seulement	Montréal(06)	Montréal (66 )	2	0	0	0	0	0	0	0	0	0	0	0	0
SPVM _ 2012 _ 11456	VE	2012/09/21	66023					1	GUY ET ARGYLE		47		11	1	3		13		13	39		2				11	1	0	0	0	16:00:00-16:59:00	2012	0	Dommages matériels seulement	Montréal(06)	Montréal (66 )	0	1	0	0	0	0	0	0	0	0	0	0	0
SPVM _ 2012 _ 11457	SA	2012/09/22	66023				CITY COUNCILLORS	1	SHERBROOKE O		31			3	3		13		11	33		3			O		2	0	0	0	04:00:00-04:59:00	2012	0	Dommages matériels seulement	Montréal(06)	Montréal (66 )	0	0	1	0	0	0	0	1	0	0	0	0	0
SPVM _ 2012 _ 11458	SA	2012/09/22	66023					1	SHERBROOKE O ET MANSFIELD		32		12	3	3		13	1	11	99		3				14	1	0	1	0	04:00:00-04:59:00	2012	1	Grave	Montréal(06)	Montréal (66 )	0	0	0	0	0	0	0	1	0	0	0	0	0
SPVM _ 2012 _ 11459	VE	2012/09/21	66023				DES PINS		PEEL	100			11	1	3		13		11	34		1			E	11	2	0	0	0	Non précisé	2012	0	Dommages matériels inférieurs au seuil de rapportage	Montréal(06)	Montréal (66 )	2	0	0	0	0	0	0	0	0	0	0	0	0
SPVM _ 2012 _ 1146	SA	2012/01/07	66097	6801			BD ST JEAN	2	STAT FAIRVIEW PTE CLAIRE		31		16	2	3		21		11	40		2				12	2	0	0	0	17:00:00-17:59:00	2012	0	Dommages matériels inférieurs au seuil de rapportage	Montréal(06)	Montréal (66 )	2	0	0	0	0	0	0	0	0	0	0	0	0
SPVM _ 2012 _ 11460	SA	2012/09/22	66023						800 GAUCHETIERE O		31		12	1	3		13		11	34		2				14	2	0	0	0	15:00:00-15:59:00	2012	0	Dommages matériels inférieurs au seuil de rapportage	Montréal(06)	Montréal (66 )	2	0	0	0	0	0	0	0	0	0	0	0	0
SPVM _ 2012 _ 11461	SA	2012/09/22	66023				SHERBROOKE	1	UNION	5	31		12	1	3		13		11	32		3			E	14	2	0	0	0	15:00:00-15:59:00	2012	0	Dommages matériels inférieurs au seuil de rapportage	Montréal(06)	Montréal (66 )	2	0	0	0	0	0	0	0	0	0	0	0	0
SPVM _ 2012 _ 11462	SA	2012/09/22	66023				CRESCENT	1	MAISONNEUVE		59		12	1	2		13		13	33		1	1		S	14	2	0	0	0	Non précisé	2012	0	Dommages matériels inférieurs au seuil de rapportage	Montréal(06)	Montréal (66 )	1	0	0	0	0	0	0	0	0	0	0	0	1
SPVM _ 2012 _ 11463	SA	2012/09/22	66023					1	MANSFIELD ET DE MAISONNEUVE	10	31		12	1	3		13		11	32		1			S	14	3	0	0	0	17:00:00-17:59:00	2012	0	Dommages matériels inférieurs au seuil de rapportage	Montréal(06)	Montréal (66 )	3	0	0	0	0	0	0	0	0	0	0	0	0
SPVM _ 2012 _ 11464	SA	2012/09/22	66023				ST MAURICE	1	DE L INSPECTEUR	20	31		12	3	2		14		11	34		1			E	12	2	0	0	0	21:00:00-21:59:00	2012	0	Dommages matériels seulement	Montréal(06)	Montréal (66 )	1	0	0	0	0	0	0	0	0	0	0	0	1
SPVM _ 2012 _ 11465	DI	2012/09/23	66023				PINE				50		11	1	3		13		11	34		1				11	2	0	0	0	13:00:00-13:59:00	2012	0	Dommages matériels inférieurs au seuil de rapportage	Montréal(06)	Montréal (66 )	2	0	0	0	0	0	0	0	0	0	0	0	0
SPVM _ 2012 _ 11466	SA	2012/09/22	66023				ST MAURICE		DE L INSPECTEUR	10	31		12	3	2		14		11	33		1			E	14	2	0	0	0	20:00:00-20:59:00	2012	0	Dommages matériels seulement	Montréal(06)	Montréal (66 )	1	0	0	0	0	0	0	0	0	0	0	0	1
SPVM _ 2012 _ 11467	DI	2012/09/23	66023				CRESCENT	1	STE CATHERINE O	10	31		11	3	3		13		11	33		1				11	2	0	0	0	03:00:00-03:59:00	2012	0	Dommages matériels inférieurs au seuil de rapportage	Montréal(06)	Montréal (66 )	1	0	0	0	0	0	0	1	0	0	0	0	0
SPVM _ 2012 _ 11468	LU	2012/09/24	66023				PINS	1	PEEL	50	31		11	1	2		13		13	33		1	2		E	11	2	0	0	0	10:00:00-10:59:00	2012	0	Dommages matériels seulement	Montréal(06)	Montréal (66 )	1	1	0	0	0	0	0	0	0	0	0	0	0
SPVM _ 2012 _ 11469	LU	2012/09/24	66023				STE CATHERINE	1	UNIVERSITY		31		11	1	3		13		11	32		1	2		O	11	2	0	0	0	Non précisé	2012	0	Dommages matériels seulement	Montréal(06)	Montréal (66 )	1	1	0	0	0	0	0	0	0	0	0	0	0
SPVM _ 2012 _ 1147	DI	2012/01/08	66097	6801			TRANSCANADIENNE	2	PORES POTEAU NO 9		31		16	1	3		21		11	40		9				11	2	0	0	0	Non précisé	2012	0	Dommages matériels inférieurs au seuil de rapportage	Montréal(06)	Montréal (66 )	1	0	0	0	0	0	0	0	0	0	0	0	1
SPVM _ 2012 _ 11470	MA	2012/09/25	66023	1435			DRUMMOND	1	STE CATHERINE	30	31		11	1	3		19		11	34		1			N	11	2	0	0	0	10:00:00-10:59:00	2012	0	Dommages matériels inférieurs au seuil de rapportage	Montréal(06)	Montréal (66 )	2	0	0	0	0	0	0	0	0	0	0	0	0
SPVM _ 2012 _ 11471	MA	2012/09/25	66023	3660			SIR WILLIAM OSLER	1	DR PENFIELD	100	31		11	1	1		14		13	34		2			N	11	2	0	0	0	06:00:00-06:59:00	2012	0	Dommages matériels inférieurs au seuil de rapportage	Montréal(06)	Montréal (66 )	2	0	0	0	0	0	0	0	0	0	0	0	0
SPVM _ 2012 _ 11472	MA	2012/09/25	66023				ST JACQUES	1	N-D	5	31		11	1	3		13		11	33		3			O	11	2	0	0	0	15:00:00-15:59:00	2012	0	Dommages matériels seulement	Montréal(06)	Montréal (66 )	1	0	0	0	0	0	0	1	0	0	0	0	0
SPVM _ 2012 _ 11473	VE	2012/09/14	66023	1250			RENE LEVESQUE O						11	1	3		21		11	99		1				11	2	0	0	0	Non précisé	2012	0	Dommages matériels seulement	Montréal(06)	Montréal (66 )	2	0	0	0	0	0	0	0	0	0	0	0	0
SPVM _ 2012 _ 11474	MA	2012/09/25	66023	1471			CRESCENT				31		11	3	3		13		11	33		1				11	2	0	0	0	23:00:00-23:59:00	2012	0	Dommages matériels inférieurs au seuil de rapportage	Montréal(06)	Montréal (66 )	2	0	0	0	0	0	0	0	0	0	0	0	0
SPVM _ 2012 _ 11475	LU	2012/09/24	66023	1529			CEDAR MTL				31			1	3		21										2	0	0	0	Non précisé	2012	0	Dommages matériels inférieurs au seuil de rapportage	Montréal(06)	Montréal (66 )	1	0	0	0	0	0	0	0	0	0	0	0	1
SPVM _ 2012 _ 11476	ME	2012/09/26	66023	276			ST JACQUES				33			1	3		13	1	11	34		1					2	0	0	1	08:00:00-08:59:00	2012	1	Léger	Montréal(06)	Montréal (66 )	1	0	0	0	1	0	0	0	0	0	0	0	0
SPVM _ 2012 _ 11477	ME	2012/09/26	66023				AQUEDUC		BARRE	25	31		11	3	5		14		11	33		1			N	12	2	0	0	0	19:00:00-19:59:00	2012	0	Dommages matériels inférieurs au seuil de rapportage	Montréal(06)	Montréal (66 )	0	0	0	0	0	0	0	1	0	0	0	0	1
SPVM _ 2012 _ 11478	JE	2012/09/27	66023				ST ANTOINE	1	DEI LA CATHEDRALE		31		11	1	3		13		11	34		3				11	2	0	0	0	08:00:00-08:59:00	2012	0	Dommages matériels inférieurs au seuil de rapportage	Montréal(06)	Montréal (66 )	2	0	0	0	0	0	0	0	0	0	0	0	0
SPVM _ 2012 _ 11479	JE	2012/09/27	66023				ST ANTOINE	1	SQ VICTORIA		38		11	1	3		19		11	32		2				11	1	0	0	0	08:00:00-08:59:00	2012	0	Dommages matériels inférieurs au seuil de rapportage	Montréal(06)	Montréal (66 )	0	1	0	0	0	0	0	0	0	0	0	0	0
SPVM _ 2012 _ 1148	DI	2012/01/08	66087	800			LEIGH CAPREOL				31		12	3	9		21			99							2	0	0	0	18:00:00-18:59:00	2012	0	Dommages matériels inférieurs au seuil de rapportage	Montréal(06)	Montréal (66 )	2	0	0	0	0	0	0	0	0	0	0	0	0
SPVM _ 2012 _ 11480	MA	2012/08/28	66023				SHERBROOKE	1	DE LA MONTAGNE	30	31		12	1	3		13	1	11	33	6	3			O	14	2	0	0	1	11:00:00-11:59:00	2012	1	Léger	Montréal(06)	Montréal (66 )	1	0	0	0	0	1	0	0	0	0	0	0	0
SPVM _ 2012 _ 11481	JE	2012/09/27	66023	1500			PL VICTOR HUGO				32		11	2			22	1	11	99	10	9				11	2	0	0	0	12:00:00-12:59:00	2012	0	Dommages matériels inférieurs au seuil de rapportage	Montréal(06)	Montréal (66 )	1	0	0	0	0	0	0	0	0	0	0	0	1
SPVM _ 2012 _ 11482	JE	2012/09/27	66023	1440			DE LA MONTAGNE				31		11	1	3		21		11	99		9				11	2	0	0	0	Non précisé	2012	0	Dommages matériels inférieurs au seuil de rapportage	Montréal(06)	Montréal (66 )	2	0	0	0	0	0	0	0	0	0	0	0	0
SPVM _ 2012 _ 11483	JE	2012/09/27	66023				N-D O	1	DE LA MONTAGNE		33		11	1	3		13		11	32		2				11	2	0	0	0	13:00:00-13:59:00	2012	0	Dommages matériels inférieurs au seuil de rapportage	Montréal(06)	Montréal (66 )	1	0	0	0	1	0	0	0	0	0	0	0	0
SPVM _ 2012 _ 11484	ME	2012/09/26	66023	980			GUY	1	RENE LEVESQUE	50	31		11	1	3		14		11	34		3			S	12	2	0	0	0	Non précisé	2012	0	Dommages matériels inférieurs au seuil de rapportage	Montréal(06)	Montréal (66 )	0	0	0	0	0	0	0	0	1	0	0	0	1
SPVM _ 2012 _ 11485	VE	2012/09/28	66023				PEEL	1	STE CATHERINE O	10	31		11	3	3		13		11	33		2			S	11	2	0	0	0	03:00:00-03:59:00	2012	0	Dommages matériels seulement	Montréal(06)	Montréal (66 )	1	0	0	0	0	0	0	1	0	0	0	0	0
SPVM _ 2012 _ 11486	VE	2012/09/28	66023	687			AV DES PINS O				31		11	1	3		21		11	99		4				11	2	0	0	0	12:00:00-12:59:00	2012	0	Dommages matériels inférieurs au seuil de rapportage	Montréal(06)	Montréal (66 )	2	0	0	0	0	0	0	0	0	0	0	0	0
SPVM _ 2012 _ 11487	JE	2012/09/27	66023				SHANNON	1	WILLIAM	5	31		11	1	2		14		11	32		1	2			11	2	0	0	0	09:00:00-09:59:00	2012	0	Dommages matériels inférieurs au seuil de rapportage	Montréal(06)	Montréal (66 )	1	1	0	0	0	0	0	0	0	0	0	0	0
SPVM _ 2012 _ 11488	VE	2012/09/28	66023				PEEL	1	WELLINGTON		31		11	1	4		13		11	32		3				11	2	0	0	0	16:00:00-16:59:00	2012	0	Dommages matériels inférieurs au seuil de rapportage	Montréal(06)	Montréal (66 )	1	0	0	0	0	0	1	0	0	0	0	0	0
SPVM _ 2012 _ 11489	VE	2012/09/28	66023	1463			ARGYLE	1	LUCIEN L ALLIER	100	31		11	1	2		14		11	34		1	1		E	11	2	0	0	0	16:00:00-16:59:00	2012	0	Dommages matériels seulement	Montréal(06)	Montréal (66 )	2	0	0	0	0	0	0	0	0	0	0	0	0
SPVM _ 2012 _ 1149	ME	2012/01/04	66023				ROMEO VACHON N	1	ROMEO VACHON S		31		12	3	4		11		11	32		1				12	2	0	0	0	20:00:00-20:59:00	2012	0	Dommages matériels seulement	Montréal(06)	Montréal (66 )	2	0	0	0	0	0	0	0	0	0	0	0	0
SPVM _ 2012 _ 11490	SA	2012/09/29	66023	2189			BISHOP	1	SHERBROOK	10	31		11	1	2		13		11						S	11	2	0	0	0	11:00:00-11:59:00	2012	0	Dommages matériels inférieurs au seuil de rapportage	Montréal(06)	Montréal (66 )	2	0	0	0	0	0	0	0	0	0	0	0	0
SPVM _ 2012 _ 11491	SA	2012/09/29	66023				CRESCENT	1	STE CATHERINE		31		11	1	3		15		11	33		1			N	11	2	0	0	0	11:00:00-11:59:00	2012	0	Dommages matériels inférieurs au seuil de rapportage	Montréal(06)	Montréal (66 )	0	1	0	0	0	0	0	0	1	0	0	0	0
SPVM _ 2012 _ 11492	SA	2012/09/29	66023	1196			CAMILIEN HOUDE	2	MT ROYAL		75		12	3	7		15		21	99		2			N	14	1	0	0	0	22:00:00-22:59:00	2012	0	Dommages matériels seulement	Montréal(06)	Montréal (66 )	1	0	0	0	0	0	0	0	0	0	0	0	0
SPVM _ 2012 _ 11493	DI	2012/09/30	66023				SHERBROOKE	1	UNIVERSITY	5	31		12	2	3		13		11	32		3				14	2	0	0	0	15:00:00-15:59:00	2012	0	Dommages matériels seulement	Montréal(06)	Montréal (66 )	1	0	0	0	0	0	0	0	1	0	0	0	0
SPVM _ 2012 _ 11494	DI	2012/09/30	66023	2250			GUY				31		12	1	3		13		13	34		3				14	2	0	0	0	12:00:00-12:59:00	2012	0	Dommages matériels seulement	Montréal(06)	Montréal (66 )	2	0	0	0	0	0	0	0	0	0	0	0	0
SPVM _ 2012 _ 11495	DI	2012/09/30	66023				MAISONNEUVE O	1	AYLMER		31		12	3	3		13		11	32		1				14	2	0	0	0	18:00:00-18:59:00	2012	0	Dommages matériels seulement	Montréal(06)	Montréal (66 )	2	0	0	0	0	0	0	0	0	0	0	0	0
SPVM _ 2012 _ 11496	SA	2012/09/29	66023				STANLEY		STE CATHERINE	100	31		11	3	3		13		11	34		1			S	12	2	0	0	0	00:00:00-00:59:00	2012	0	Dommages matériels seulement	Montréal(06)	Montréal (66 )	1	0	0	0	0	0	0	0	0	0	0	0	1
SPVM _ 2012 _ 11497	MA	2012/10/02	66023				DE LA GAUCHETIERE				31		11	1	3		13		11	34		3				12	2	0	0	0	12:00:00-12:59:00	2012	0	Dommages matériels seulement	Montréal(06)	Montréal (66 )	2	0	0	0	0	0	0	0	0	0	0	0	0
SPVM _ 2012 _ 11498	MA	2012/10/02	66023	1231			STE CATHERINE	1	DRUMMOND		31		11	1	3		13		11	33		1				11	2	0	0	0	12:00:00-12:59:00	2012	0	Dommages matériels inférieurs au seuil de rapportage	Montréal(06)	Montréal (66 )	1	0	0	0	0	0	0	0	0	0	0	0	1
SPVM _ 2012 _ 11499	MA	2012/07/17	66023	1232			PEEL				31				3		13			34							2	0	0	0	20:00:00-20:59:00	2012	0	Dommages matériels inférieurs au seuil de rapportage	Montréal(06)	Montréal (66 )	2	0	0	0	0	0	0	0	0	0	0	0	0
SPVM _ 2012 _ 115	JE	2012/03/01	66023				ST CHARLES	1	OAKWOOD		42		16	1	3		13		11	32		4			E	12	1	0	0	0	14:00:00-14:59:00	2012	0	Dommages matériels inférieurs au seuil de rapportage	Montréal(06)	Montréal (66 )	1	0	0	0	0	0	0	0	0	0	0	0	0
SPVM _ 2012 _ 1150	LU	2012/01/09	66097	6301			TRANSCANADIENNE	2	STAT TOY R US		31		15	1	3		21									17	2	0	0	0	09:00:00-09:59:00	2012	0	Dommages matériels inférieurs au seuil de rapportage	Montréal(06)	Montréal (66 )	1	0	0	0	0	0	0	0	0	0	0	0	1
SPVM _ 2012 _ 11500	MA	2012/10/02	66023	420			SHERBROOKE O	1	DUROCHER		31		11	1	3		13		11	32		3				12	2	0	0	0	15:00:00-15:59:00	2012	0	Dommages matériels seulement	Montréal(06)	Montréal (66 )	2	0	0	0	0	0	0	0	0	0	0	0	0
SPVM _ 2012 _ 11501	MA	2012/10/02	66023				MONTAGNE	1	STE CATHERINE	5			11	3	2		13		11	32		2			N	11	2	0	0	0	21:00:00-21:59:00	2012	0	Dommages matériels inférieurs au seuil de rapportage	Montréal(06)	Montréal (66 )	0	0	0	0	0	0	0	0	1	0	0	0	1
SPVM _ 2012 _ 11502	LU	2012/09/03	66023	2160			MONTAGNE	1	MAISONNEUVE	10	31		11	1	3		13		11	33		2			S	11	2	0	0	0	13:00:00-13:59:00	2012	0	Dommages matériels inférieurs au seuil de rapportage	Montréal(06)	Montréal (66 )	1	1	0	0	0	0	0	0	0	0	0	0	0
SPVM _ 2012 _ 11503	DI	2012/09/23	66023	1909			AV DES CANADIENS	2	STAT C BELL		42		11	1	7		21		11							11	1	0	0	0	15:00:00-15:59:00	2012	0	Dommages matériels inférieurs au seuil de rapportage	Montréal(06)	Montréal (66 )	0	0	0	0	0	0	0	0	1	0	0	0	0
SPVM _ 2012 _ 11504	ME	2012/10/03	66023				MANSFIELD	1	MAISONNEUVE	30	31		12	1	3		13		11	33					S	11	2	0	0	0	11:00:00-11:59:00	2012	0	Dommages matériels seulement	Montréal(06)	Montréal (66 )	1	0	0	0	0	0	0	0	0	0	0	0	1
SPVM _ 2012 _ 11505	VE	2012/09/28	66023				STANLEY	1	STE CATHERINE	5	31		11	3	3		13		11	32		1			S	11	2	0	0	0	20:00:00-20:59:00	2012	0	Dommages matériels inférieurs au seuil de rapportage	Montréal(06)	Montréal (66 )	1	0	0	0	0	0	0	0	0	0	0	0	1
SPVM _ 2012 _ 11506	JE	2012/10/04	66023				RENE LEVESQUE	1	COTE BEAVER HALL		31		11	1	3		13		12	32		3				12	2	0	0	0	13:00:00-13:59:00	2012	0	Dommages matériels seulement	Montréal(06)	Montréal (66 )	1	1	0	0	0	0	0	0	0	0	0	0	0
SPVM _ 2012 _ 11507	JE	2012/10/04	66023	687			DES PINS				31		12	1	3		21		11	99							2	0	0	0	07:00:00-07:59:00	2012	0	Dommages matériels inférieurs au seuil de rapportage	Montréal(06)	Montréal (66 )	1	0	0	0	0	0	0	0	0	0	0	0	1
SPVM _ 2012 _ 11508	JE	2012/10/04	66023				VIGER	1	BEAVER HALL	5	31		11	3	3		13		14	32		1			N	11	2	0	0	0	23:00:00-23:59:00	2012	0	Dommages matériels seulement	Montréal(06)	Montréal (66 )	1	0	0	0	0	0	0	0	0	0	0	0	1
SPVM _ 2012 _ 11509	VE	2012/09/14	66023				J P RIOPEL STAT SOUSTERRAIN				31		11	1	3		21		11	99		9				11	2	0	0	0	14:00:00-14:59:00	2012	0	Dommages matériels inférieurs au seuil de rapportage	Montréal(06)	Montréal (66 )	2	0	0	0	0	0	0	0	0	0	0	0	0
SPVM _ 2012 _ 1151	MA	2012/01/03	66097				ST JEAN	2	BRUNSWICK		31		12	3	3		13		11	32		5				11	3	0	0	0	18:00:00-18:59:00	2012	0	Dommages matériels inférieurs au seuil de rapportage	Montréal(06)	Montréal (66 )	3	0	0	0	0	0	0	0	0	0	0	0	0
SPVM _ 2012 _ 11510	VE	2012/10/05	66023				ST JACQUES		DE LA MONTAGNE		31																2	0	0	0	Non précisé	2012	0	Dommages matériels inférieurs au seuil de rapportage	Montréal(06)	Montréal (66 )	1	0	0	0	0	0	0	0	0	0	0	0	1
SPVM _ 2012 _ 11511	VE	2012/10/05	66023				MAISONNEUVE	1	UNIVERSITY	15	99	9	11	1	3		13	1	11	33	6	1			O	11	1	0	0	1	13:00:00-13:59:00	2012	1	Léger	Montréal(06)	Montréal (66 )	0	0	0	0	0	1	0	0	0	0	0	0	0
SPVM _ 2012 _ 11512	VE	2012/10/05	66023				SHERBROOKE		UNION	10	31		11	1	3		19		11	33		3			E	11	2	0	0	0	15:00:00-15:59:00	2012	0	Dommages matériels inférieurs au seuil de rapportage	Montréal(06)	Montréal (66 )	1	0	0	0	0	0	0	0	0	0	0	1	0
SPVM _ 2012 _ 11513	VE	2012/10/05	66023				ST MAURICE	1	NAZARETH	2	47		11	1			15		11	35		1				11	2	0	0	0	16:00:00-16:59:00	2012	0	Dommages matériels seulement	Montréal(06)	Montréal (66 )	0	1	0	0	0	0	0	0	0	0	0	0	1
SPVM _ 2012 _ 11514	VE	2012/10/05	66023				RENE LEVESQUE	1	DRUMMOND	10	31		11	3	3		13		11	32		1			E	12	3	0	0	0	20:00:00-20:59:00	2012	0	Dommages matériels inférieurs au seuil de rapportage	Montréal(06)	Montréal (66 )	2	0	0	0	0	0	1	0	0	0	0	0	0
SPVM _ 2012 _ 11515	SA	2012/10/06	66023				MONTAGNE		TORRANCE	150	59		12	3	3		11		22	33		1			S	15	1	0	0	0	05:00:00-05:59:00	2012	0	Dommages matériels seulement	Montréal(06)	Montréal (66 )	1	0	0	0	0	0	0	0	0	0	0	0	0
SPVM _ 2012 _ 11516	DI	2012/10/07	66023	298			PEEL		OTTAWA	50	31		11	1	2		19	1	11	34	6	3			S	11	2	0	1	0	16:00:00-16:59:00	2012	1	Grave	Montréal(06)	Montréal (66 )	1	0	0	1	0	0	0	0	0	0	0	0	0
SPVM _ 2012 _ 11517	DI	2012/10/07	66023				SHERBROOKE O	1	CITY COUNCILORS	5	31		11	3			13		11	32		3				11	2	0	0	0	20:00:00-20:59:00	2012	0	Dommages matériels inférieurs au seuil de rapportage	Montréal(06)	Montréal (66 )	1	0	0	0	0	0	0	0	0	0	0	0	1
SPVM _ 2012 _ 11518	MA	2012/10/09	66023				VIGER	1	UNIVERSITY		31		11	3	3		13		11	32		1				11	2	0	0	0	00:00:00-00:59:00	2012	0	Dommages matériels inférieurs au seuil de rapportage	Montréal(06)	Montréal (66 )	2	0	0	0	0	0	0	0	0	0	0	0	0
SPVM _ 2012 _ 11519	MA	2012/10/09	66023				DE MAISONNEUVE O	1	MCGILL COLLEGE		33		11	1	3		13	1	11	32	5	1				11	2	0	0	1	16:00:00-16:59:00	2012	1	Léger	Montréal(06)	Montréal (66 )	0	0	0	0	1	0	0	1	0	0	0	0	0
SPVM _ 2012 _ 1152	LU	2012/01/09	66097	221			ST LOUIS	2	TROTTOIR FACE A L ADRESSE	20	37		12	3	2		14		11	34		2			E	11	1	0	0	0	18:00:00-18:59:00	2012	0	Dommages matériels inférieurs au seuil de rapportage	Montréal(06)	Montréal (66 )	1	0	0	0	0	0	0	0	0	0	0	0	0
SPVM _ 2012 _ 11520	MA	2012/10/09	66023				UNION	1	RENE LEVESQUE O	5	31		11	1	3		13		11	33		1				11	2	0	0	0	15:00:00-15:59:00	2012	0	Dommages matériels inférieurs au seuil de rapportage	Montréal(06)	Montréal (66 )	1	0	0	0	0	0	0	0	0	0	0	0	1
SPVM _ 2012 _ 11521	MA	2012/10/09	66023				COTE DES NEIGES	1	CEDAR	100	31		11	2	2		14		22	34		1			N	11	2	0	0	0	18:00:00-18:59:00	2012	0	Dommages matériels inférieurs au seuil de rapportage	Montréal(06)	Montréal (66 )	0	1	0	0	0	0	0	1	0	0	0	0	0
SPVM _ 2012 _ 11522	ME	2012/10/10	66023	2120			GUY	1	MAISONNEUVE O	20	33		11	1	3		19	1	11	34	6	3			N	12	3	0	0	0	09:00:00-09:59:00	2012	0	Dommages matériels seulement	Montréal(06)	Montréal (66 )	2	0	0	0	1	0	0	0	0	0	0	0	0
SPVM _ 2012 _ 11523	ME	2012/10/10	66023				MAISONNEUVE O	1	UNION		33		11	1	3		13		11	32		1				12	2	0	0	0	10:00:00-10:59:00	2012	0	Dommages matériels inférieurs au seuil de rapportage	Montréal(06)	Montréal (66 )	1	0	0	0	1	0	0	0	0	0	0	0	0
SPVM _ 2012 _ 11524	ME	2012/10/10	66023	2001			MCGILL COLLEGE				31		11	1	3		21		11	99							2	0	0	0	20:00:00-20:59:00	2012	0	Dommages matériels inférieurs au seuil de rapportage	Montréal(06)	Montréal (66 )	1	0	0	0	0	0	0	0	0	0	0	1	0
SPVM _ 2012 _ 11525	ME	2012/10/10	66023				PEEL	1	SHERBROOKE		31		11	1	3		13		11	33		2				11	2	0	0	0	12:00:00-12:59:00	2012	0	Dommages matériels inférieurs au seuil de rapportage	Montréal(06)	Montréal (66 )	2	0	0	0	0	0	0	0	0	0	0	0	0
SPVM _ 2012 _ 11526	MA	2012/10/09	66023	687			DES PINS O	1	DR PENFIELD	100	31		11	1	2		21		11	34		1			O	11	2	0	0	0	16:00:00-16:59:00	2012	0	Dommages matériels inférieurs au seuil de rapportage	Montréal(06)	Montréal (66 )	1	0	0	0	0	0	0	0	0	0	0	0	1
SPVM _ 2012 _ 11527	ME	2012/10/10	66023				COTE DES NEIGES		DOCTEUR PENFIELD		31		12	1	3		13		13	32		1				14	2	0	0	1	16:00:00-16:59:00	2012	1	Léger	Montréal(06)	Montréal (66 )	1	0	0	0	0	0	1	0	0	0	0	0	0
SPVM _ 2012 _ 11528	JE	2012/10/11	66023				RENE LEVESQUE O	1	DRUMMOND		31		11	1	3		13		11	32		3				11	2	0	0	0	17:00:00-17:59:00	2012	0	Dommages matériels seulement	Montréal(06)	Montréal (66 )	1	0	0	0	0	0	0	1	0	0	0	0	0
SPVM _ 2012 _ 11529	JE	2012/10/11	66023				RENE LEVESQUE	1	GUY	20	31		12	3	3		13	1	11	33	6	3			E	14	2	0	0	0	21:00:00-21:59:00	2012	0	Dommages matériels seulement	Montréal(06)	Montréal (66 )	1	0	0	0	0	0	0	1	0	0	0	0	0
SPVM _ 2012 _ 1153	MA	2012/01/10	66087	1400			TRANS CANADA VOIE SERV 40 E				31		12	1	3		11		11	34		1				12	2	0	0	0	08:00:00-08:59:00	2012	0	Dommages matériels seulement	Montréal(06)	Montréal (66 )	2	0	0	0	0	0	0	0	0	0	0	0	0
SPVM _ 2012 _ 11530	SA	2012/10/13	66023				STE CATHERINE O	1	MANSFIELD		31		11	2	3		13	1	11	32	6	1				12	2	0	0	1	06:00:00-06:59:00	2012	1	Léger	Montréal(06)	Montréal (66 )	1	0	0	0	0	0	0	1	0	0	0	0	0
SPVM _ 2012 _ 11531	VE	2012/10/12	66023					1	SHERBROOKE ET STANLEY		31		11	3	3		13		11	32		3			E	11	2	0	0	0	20:00:00-20:59:00	2012	0	Dommages matériels inférieurs au seuil de rapportage	Montréal(06)	Montréal (66 )	2	0	0	0	0	0	0	0	0	0	0	0	0
SPVM _ 2012 _ 11532	SA	2012/10/13	66023				DOCTEUR PENFIELD	1	PEEL	5		1	11	1	1		13		13	32		1				11	1	0	0	0	11:00:00-11:59:00	2012	0	Dommages matériels seulement	Montréal(06)	Montréal (66 )	0	0	0	1	0	0	0	0	0	0	0	0	0
SPVM _ 2012 _ 11533	VE	2012/10/12	66023				DE LA MONTAGNE	1	MAISONNEUVE	30	31		11	1	3		13		11	33		2			S	11	2	0	0	0	15:00:00-15:59:00	2012	0	Dommages matériels inférieurs au seuil de rapportage	Montréal(06)	Montréal (66 )	2	0	0	0	0	0	0	0	0	0	0	0	0
SPVM _ 2012 _ 11534	VE	2012/10/12	66023	1414			DANDURAND	2	DS STAT INT		31		11	1	9		21		11	99		1				11	2	0	0	0	19:00:00-19:59:00	2012	0	Dommages matériels inférieurs au seuil de rapportage	Montréal(06)	Montréal (66 )	1	0	0	0	0	0	0	0	0	0	0	0	1
SPVM _ 2012 _ 11535	LU	2012/10/08	66023				BRENNAN		DE LA COMMUNE		31				3		19		11	32		1					2	0	0	0	Non précisé	2012	0	Dommages matériels seulement	Montréal(06)	Montréal (66 )	1	0	0	0	0	0	0	0	0	0	0	0	1
SPVM _ 2012 _ 11536	JE	2012/10/11	66023	687			AV DES PINS O				31		11	1	3		21		11	99		9				11	2	0	0	0	14:00:00-14:59:00	2012	0	Dommages matériels inférieurs au seuil de rapportage	Montréal(06)	Montréal (66 )	1	0	0	0	0	0	0	0	0	0	0	0	1
SPVM _ 2012 _ 11537	DI	2012/10/14	66023				N-D	1	PEEL		33		12	2	3		13	1	11	32		3				14	2	0	0	1	05:00:00-05:59:00	2012	1	Léger	Montréal(06)	Montréal (66 )	1	0	0	0	1	0	0	0	0	0	0	0	0
SPVM _ 2012 _ 11538	DI	2012/10/14	66023					2	445 VIGER FACE AU		31		12	3	3		13		11	32		1				14	2	0	0	0	13:00:00-13:59:00	2012	0	Dommages matériels seulement	Montréal(06)	Montréal (66 )	2	0	0	0	0	0	0	0	0	0	0	0	0
SPVM _ 2012 _ 11539	DI	2012/10/14	66023	1445			SHERBROOKE O				32		12	3	3		19	1	11	32	6	3				14	1	0	1	0	19:00:00-19:59:00	2012	1	Grave	Montréal(06)	Montréal (66 )	1	0	0	0	0	0	0	0	0	0	0	0	0
SPVM _ 2012 _ 1154	MA	2012/01/10	66097	6815			TRANSCANADIENNE			5	31		16	1	3		21		11	40		9			S	11	2	0	0	0	12:00:00-12:59:00	2012	0	Dommages matériels inférieurs au seuil de rapportage	Montréal(06)	Montréal (66 )	1	0	0	0	0	0	0	0	0	0	0	0	1
SPVM _ 2012 _ 11540	LU	2012/10/15	66023	1650			CEDAR				31		11	1	3		21		11	99		9				12	2	0	0	0	Non précisé	2012	0	Dommages matériels inférieurs au seuil de rapportage	Montréal(06)	Montréal (66 )	1	0	0	0	0	0	0	0	0	0	0	0	1
SPVM _ 2012 _ 11541	LU	2012/10/15	66023				SIR WILLIAM OSLER				31		11	1	1		14		11	34		2				12	2	0	0	0	16:00:00-16:59:00	2012	0	Dommages matériels inférieurs au seuil de rapportage	Montréal(06)	Montréal (66 )	1	1	0	0	0	0	0	0	0	0	0	0	0
SPVM _ 2012 _ 11542	LU	2012/10/15	66023				GUY	1	MAISONNEUVE	75	31		11	1	3		13		11	33		2			S	11	2	0	0	0	12:00:00-12:59:00	2012	0	Dommages matériels inférieurs au seuil de rapportage	Montréal(06)	Montréal (66 )	1	0	0	0	0	0	0	0	0	0	0	0	1
SPVM _ 2012 _ 11543	MA	2012/10/16	66023	1650			CEDAR AV				31		11	1	3		21		14	99						11	2	0	0	0	11:00:00-11:59:00	2012	0	Dommages matériels inférieurs au seuil de rapportage	Montréal(06)	Montréal (66 )	1	0	0	0	0	0	0	0	0	0	0	0	1
SPVM _ 2012 _ 11544	LU	2012/10/15	66023	3700			MC TAVISH	1	AV DES PINS	100	31		11	1	2		14		11	34		1			S	12	2	0	0	0	14:00:00-14:59:00	2012	0	Dommages matériels seulement	Montréal(06)	Montréal (66 )	1	0	0	0	0	0	0	0	0	0	0	0	1
SPVM _ 2012 _ 11545	MA	2012/10/16	66023				MAISONNEUVE				33		11	1	3		13	1		32	6	1				11	2	0	0	1	12:00:00-12:59:00	2012	1	Léger	Montréal(06)	Montréal (66 )	1	0	0	0	1	0	0	0	0	0	0	0	0
SPVM _ 2012 _ 11546	ME	2012/10/17	66023				MAISONNEUVE	1	UNION		32		11	1	3		13	1	11	32	6	1				11	1	0	0	1	08:00:00-08:59:00	2012	1	Léger	Montréal(06)	Montréal (66 )	1	0	0	0	0	0	0	0	0	0	0	0	0
SPVM _ 2012 _ 11547	MA	2012/10/16	66023				SHERBROOKE	1	MANSFIELD		31		11	3	3		13		11	32		2				11	2	0	0	0	19:00:00-19:59:00	2012	0	Dommages matériels seulement	Montréal(06)	Montréal (66 )	2	0	0	0	0	0	0	0	0	0	0	0	0
SPVM _ 2012 _ 11548	ME	2012/10/17	66023	1240			DRUMMOND	2	STE CATHERINE O	10	31		11	1	3		21		11	40					S	11	2	0	0	0	09:00:00-09:59:00	2012	0	Dommages matériels inférieurs au seuil de rapportage	Montréal(06)	Montréal (66 )	1	0	0	0	0	0	0	0	0	0	0	0	1
SPVM _ 2012 _ 11549	ME	2012/10/17	66023	1196			CAMILIEN HOUDE				59		11	1	7		25	5	11	99	10	9				11	1	0	0	2	14:00:00-14:59:00	2012	2	Léger	Montréal(06)	Montréal (66 )	0	0	0	0	0	0	0	0	1	0	0	0	0
SPVM _ 2012 _ 1155	MA	2012/01/10	66097	33			MAYWOOD				31		11	1	9		21		11	99		9				11	2	0	0	0	09:00:00-09:59:00	2012	0	Dommages matériels seulement	Montréal(06)	Montréal (66 )	2	0	0	0	0	0	0	0	0	0	0	0	0
SPVM _ 2012 _ 11550	ME	2012/10/17	66023				N-D O	1	CATHEDRALE		31		11	3	3		19	1	11	32	6	3			N	11	2	0	0	2	20:00:00-20:59:00	2012	2	Léger	Montréal(06)	Montréal (66 )	2	0	0	0	0	0	0	0	0	0	0	0	0
SPVM _ 2012 _ 11551	JE	2012/10/18	66023				DE LA MONTAGNE	1	STE BLANDINE O		31		11	3	3		14		11	32		2				11	2	0	0	0	02:00:00-02:59:00	2012	0	Dommages matériels seulement	Montréal(06)	Montréal (66 )	1	1	0	0	0	0	0	0	0	0	0	0	0
SPVM _ 2012 _ 11552	JE	2012/10/18	66023	2150			ST MARC						11	2	2		13		13	33		1				11	2	0	0	0	16:00:00-16:59:00	2012	0	Dommages matériels seulement	Montréal(06)	Montréal (66 )	2	0	0	0	0	0	0	0	0	0	0	0	0
SPVM _ 2012 _ 11553	JE	2012/10/18	66023				CRESCENT	1	STE CATHERINE O	20	31		11	3	3		13		11	33		1			S	11	2	0	0	0	Non précisé	2012	0	Dommages matériels inférieurs au seuil de rapportage	Montréal(06)	Montréal (66 )	1	0	0	0	0	0	0	0	0	0	0	0	1
SPVM _ 2012 _ 11554	VE	2012/10/19	66023	1001			SQUARE DORCHESTER				43		11	3	7		29	1	11	99	10	9				12	1	0	1	0	04:00:00-04:59:00	2012	1	Grave	Montréal(06)	Montréal (66 )	1	0	0	0	0	0	0	0	0	0	0	0	0
SPVM _ 2012 _ 11555	JE	2012/10/18	66023				SHERBROOKE		SIMPSON		33		11	3	3		13		11							12	2	0	0	0	21:00:00-21:59:00	2012	0	Dommages matériels inférieurs au seuil de rapportage	Montréal(06)	Montréal (66 )	1	0	0	0	0	0	0	0	0	0	0	0	1
SPVM _ 2012 _ 11556	ME	2012/10/10	66023	2020			UNIVERSITY				31		11		9		21		11	99						99	2	0	0	0	17:00:00-17:59:00	2012	0	Dommages matériels inférieurs au seuil de rapportage	Montréal(06)	Montréal (66 )	1	0	0	0	0	0	0	0	0	0	0	0	1
SPVM _ 2012 _ 11557	VE	2012/10/19	66023				ST ANTOINE				31		12	1	3		13		11	34		3			O	14	5	0	0	0	14:00:00-14:59:00	2012	0	Dommages matériels seulement	Montréal(06)	Montréal (66 )	4	1	0	0	0	0	0	0	0	0	0	0	0
SPVM _ 2012 _ 11558	VE	2012/10/19	66023				DE MAISONNEUVE O	1	AYLMER		32		13	3	3		13	1	11	32	6	1				15	1	0	0	1	18:00:00-18:59:00	2012	1	Léger	Montréal(06)	Montréal (66 )	1	0	0	0	0	0	0	0	0	0	0	0	0
SPVM _ 2012 _ 11559	ME	2012/10/17	66023	687			AV DES PINS O				31		11	1	3		21			99						11	2	0	0	0	09:00:00-09:59:00	2012	0	Dommages matériels inférieurs au seuil de rapportage	Montréal(06)	Montréal (66 )	1	0	0	0	0	0	0	0	0	0	0	0	1
SPVM _ 2012 _ 1156	LU	2012/01/09	66097					2	5701 TRANSCANADA		31			3	3		21		11	40							2	0	0	0	Non précisé	2012	0	Dommages matériels inférieurs au seuil de rapportage	Montréal(06)	Montréal (66 )	1	0	0	0	0	0	0	0	0	0	0	0	1
SPVM _ 2012 _ 11560	VE	2012/10/19	66023				PEEL	1	MAISONNEUVE O		32		12	3	3		14		11	32		2				14	1	0	0	0	22:00:00-22:59:00	2012	0	Dommages matériels inférieurs au seuil de rapportage	Montréal(06)	Montréal (66 )	1	0	0	0	0	0	0	0	0	0	0	0	0
SPVM _ 2012 _ 11561	SA	2012/10/20	66023				PEEL	1	MAISONNEUVE	2	31		12	3	3		13		13	32		1			N	14	2	0	0	0	03:00:00-03:59:00	2012	0	Dommages matériels seulement	Montréal(06)	Montréal (66 )	1	0	0	0	0	0	0	1	0	0	0	0	0
SPVM _ 2012 _ 11562	SA	2012/10/20	66023				BD DE MAISONNEUVE O	1	UNIVERSITY		31		11	1	3		13	1	11	32	6	3				12	2	0	0	1	09:00:00-09:59:00	2012	1	Léger	Montréal(06)	Montréal (66 )	1	0	0	0	0	1	0	0	0	0	0	0	0
SPVM _ 2012 _ 11563	DI	2012/10/21	66023				ST ANTOINE	1	MANSFIELD		32		11	1	3		13	1	11	32		3				12	1	0	0	1	10:00:00-10:59:00	2012	1	Léger	Montréal(06)	Montréal (66 )	1	0	0	0	0	0	0	0	0	0	0	0	0
SPVM _ 2012 _ 11564	LU	2012/10/22	66023	915			PEEL	1	GAUCHETIERE	25	31		11	1	3		13		14	33		3			S	11	2	0	0	0	12:00:00-12:59:00	2012	0	Dommages matériels seulement	Montréal(06)	Montréal (66 )	2	0	0	0	0	0	0	0	0	0	0	0	0
SPVM _ 2012 _ 11565	LU	2012/10/22	66023				MAISONNEUVE	1	MANSFIELD		31		11	1	3		13		11	33		1				11	2	0	0	0	12:00:00-12:59:00	2012	0	Dommages matériels seulement	Montréal(06)	Montréal (66 )	1	1	0	0	0	0	0	0	0	0	0	0	0
SPVM _ 2012 _ 11566	LU	2012/10/22	66023	1650			CEDAR		COTE DES NEIGES	50	31		11	1	3		21		11	40					S	11	2	0	0	0	11:00:00-11:59:00	2012	0	Dommages matériels inférieurs au seuil de rapportage	Montréal(06)	Montréal (66 )	1	0	0	0	0	0	0	0	0	0	0	0	1
SPVM _ 2012 _ 11567	LU	2012/10/22	66023				PEEL		MAISONNEUVE	100	33		11	3	3		13	1	13	34	6	2			S	11	2	0	1	0	21:00:00-21:59:00	2012	1	Grave	Montréal(06)	Montréal (66 )	1	0	0	0	1	0	0	0	0	0	0	0	0
SPVM _ 2012 _ 11568	LU	2012/10/22	66023	1001			SHERBROOKE O				31		11		3		21		11	99							2	0	0	0	18:00:00-18:59:00	2012	0	Dommages matériels inférieurs au seuil de rapportage	Montréal(06)	Montréal (66 )	1	0	0	0	0	0	0	0	0	0	0	0	1
SPVM _ 2012 _ 11569	LU	2012/10/22	66023				STANLEY	1	DE MAISONNEUVE		31		11	1	3		13		11	33		1				11	2	0	0	0	09:00:00-09:59:00	2012	0	Dommages matériels seulement	Montréal(06)	Montréal (66 )	1	0	0	0	0	0	0	0	0	0	0	0	1
SPVM _ 2012 _ 1157	JE	2012/01/12	66087	2330			HERRON	1	LAKE	50	31		16	1	3		11	1	11	34	6	1			E	17	4	0	0	1	15:00:00-15:59:00	2012	1	Léger	Montréal(06)	Montréal (66 )	3	0	0	0	1	0	0	0	0	0	0	0	0
SPVM _ 2012 _ 11570	SA	2012/09/29	66023				STANLEY		SHERBROOKE		31		12	3	3		13		13	34		1				15	2	0	0	0	18:00:00-18:59:00	2012	0	Dommages matériels seulement	Montréal(06)	Montréal (66 )	1	0	0	0	0	0	0	0	0	0	0	0	1
SPVM _ 2012 _ 11571	MA	2012/10/16	66023				CRESCENT	1	SHERBROOKE	10	31				3		13		12	33		1			S		2	0	0	0	Non précisé	2012	0	Dommages matériels inférieurs au seuil de rapportage	Montréal(06)	Montréal (66 )	1	0	0	0	0	0	0	0	0	0	0	0	1
SPVM _ 2012 _ 11572	MA	2012/10/23	66023				ST JACQUES	1	PEEL		31		11	1	3		13		11	33		1				11	2	0	0	0	17:00:00-17:59:00	2012	0	Dommages matériels seulement	Montréal(06)	Montréal (66 )	2	0	0	0	0	0	0	0	0	0	0	0	0
SPVM _ 2012 _ 11573	VE	2012/10/19	66023				CITY COUNCILLORS	1	MAISONNEUVE		31		11	1	3		21		11							11	2	0	0	0	Non précisé	2012	0	Dommages matériels inférieurs au seuil de rapportage	Montréal(06)	Montréal (66 )	0	0	0	0	0	0	1	0	0	0	0	0	1
SPVM _ 2012 _ 11574	MA	2012/10/23	66023					1	CYPRES	30	33	9	11	3	3		13	1	11	33	6	2			S	11	2	0	0	1	23:00:00-23:59:00	2012	1	Léger	Montréal(06)	Montréal (66 )	0	0	0	0	1	0	0	0	1	0	0	0	0
SPVM _ 2012 _ 11575	ME	2012/10/24	66023	1221			DE MAISONNEUVE O				31		11	3	3		14		11	33		1				11	2	0	0	0	02:00:00-02:59:00	2012	0	Dommages matériels inférieurs au seuil de rapportage	Montréal(06)	Montréal (66 )	1	1	0	0	0	0	0	0	0	0	0	0	0
SPVM _ 2012 _ 11576	ME	2012/10/24	66023				UNIVERSITY	1	RENE LEVESQUE		31		11	3	3		13	1	14	32	6	3				11	2	0	0	0	05:00:00-05:59:00	2012	0	Dommages matériels seulement	Montréal(06)	Montréal (66 )	2	0	0	0	0	0	0	0	0	0	0	0	0
SPVM _ 2012 _ 11577	MA	2012/10/23	66023	1001			SHERBROOKE O	1	MACTAVISH	50	31		11	1	3		21		11	40		9			E	11	2	0	0	0	08:00:00-08:59:00	2012	0	Dommages matériels inférieurs au seuil de rapportage	Montréal(06)	Montréal (66 )	1	0	0	0	0	0	0	0	0	0	0	0	1
SPVM _ 2012 _ 11578	ME	2012/10/24	66023	1214			SHERBROOKE O				33		11	1	3		13	1	11		6	3				11	2	0	0	1	16:00:00-16:59:00	2012	1	Léger	Montréal(06)	Montréal (66 )	1	0	0	0	1	0	0	0	0	0	0	0	0
SPVM _ 2012 _ 11579	MA	2012/10/23	66023					1	MAISONNEUVE ET CITY COUNCELLORS		31		11	1	3		13		11	32		3				11	2	0	0	0	10:00:00-10:59:00	2012	0	Dommages matériels inférieurs au seuil de rapportage	Montréal(06)	Montréal (66 )	1	0	0	0	0	1	0	0	0	0	0	0	0
SPVM _ 2012 _ 1158	JE	2012/01/12	66087	975			ROMEO VACHON	2	ZONE ARRIVEES	20	32		16	3	3		19	1	11	99	6	1			N	18	1	0	0	1	19:00:00-19:59:00	2012	1	Léger	Montréal(06)	Montréal (66 )	1	0	0	0	0	0	0	0	0	0	0	0	0
SPVM _ 2012 _ 11580	JE	2012/10/25	66023	1538			SHERBROOKE O	1	GUY	10	31		11	1	3		13		11	33		3			E	12	2	0	0	0	12:00:00-12:59:00	2012	0	Dommages matériels inférieurs au seuil de rapportage	Montréal(06)	Montréal (66 )	0	1	0	0	0	0	0	1	0	0	0	0	0
SPVM _ 2012 _ 11581	JE	2012/10/25	66023	627			ST JACQUES				31		11	1	3		21		11	40		9				11	2	0	0	0	Non précisé	2012	0	Dommages matériels inférieurs au seuil de rapportage	Montréal(06)	Montréal (66 )	1	0	0	0	0	0	0	0	0	0	0	0	1
SPVM _ 2012 _ 11582	JE	2012/10/25	66023	980			GUY				59		11	1	3		21		11							11	1	0	0	0	18:00:00-18:59:00	2012	0	Dommages matériels inférieurs au seuil de rapportage	Montréal(06)	Montréal (66 )	0	0	0	0	0	0	0	0	1	0	0	0	0
SPVM _ 2012 _ 11583	VE	2012/10/26	66023				SSTE CATHERINE O ET GUY				31		11	3	3		13	1	11	32	6	3			S	11	2	0	0	1	05:00:00-05:59:00	2012	1	Léger	Montréal(06)	Montréal (66 )	0	0	0	0	0	0	0	1	1	0	0	0	0
SPVM _ 2012 _ 11584	JE	2012/10/25	66023	687			DES PINS				31		11	1	3		21		11	99		9				11	2	0	0	0	17:00:00-17:59:00	2012	0	Dommages matériels inférieurs au seuil de rapportage	Montréal(06)	Montréal (66 )	1	0	0	0	0	0	0	0	0	0	0	0	1
SPVM _ 2012 _ 11585	VE	2012/10/26	66023	4050			PARC				33		11	1	3		13	1	11	33	6	4				11	2	0	0	1	10:00:00-10:59:00	2012	1	Léger	Montréal(06)	Montréal (66 )	1	0	0	0	1	0	0	0	0	0	0	0	0
SPVM _ 2012 _ 11586	VE	2012/10/26	66023				MACKAY	1	STE CATHERINE	20	31		11	1	3		13		11	33		1			N	11	2	0	0	0	10:00:00-10:59:00	2012	0	Dommages matériels inférieurs au seuil de rapportage	Montréal(06)	Montréal (66 )	1	0	0	0	0	0	1	0	0	0	0	0	0
SPVM _ 2012 _ 11587	DI	2012/10/21	66023	980			GUY				52		11	1	3		21		11			1				11	1	0	0	0	10:00:00-10:59:00	2012	0	Dommages matériels inférieurs au seuil de rapportage	Montréal(06)	Montréal (66 )	0	0	0	0	0	0	0	0	1	0	0	0	0
SPVM _ 2012 _ 11588	VE	2012/10/26	66023	900			LA GAUCHETIERE O				31		11	3	3		21		11								2	0	0	0	Non précisé	2012	0	Dommages matériels seulement	Montréal(06)	Montréal (66 )	1	0	0	0	0	0	0	0	0	0	0	0	1
SPVM _ 2012 _ 11589	VE	2012/10/26	66023					1	MAISONNEUVE ET UNION		33		11	1	3		13	1	11	32	5	1				11	2	0	0	1	15:00:00-15:59:00	2012	1	Léger	Montréal(06)	Montréal (66 )	1	0	0	0	1	0	0	0	0	0	0	0	0
SPVM _ 2012 _ 1159	VE	2012/01/13	66097				VOIE SERV TRANSCANADIENNE O	1	FAIRVIEW		52		16	3	3		11		11	32		1				11	1	0	0	0	06:00:00-06:59:00	2012	0	Dommages matériels seulement	Montréal(06)	Montréal (66 )	1	0	0	0	0	0	0	0	0	0	0	0	0
SPVM _ 2012 _ 11590	VE	2012/10/26	66023				PEEL	1	RENE LEVESQUE		33		11	2	3		13	1	11	32		3				11	2	0	0	1	17:00:00-17:59:00	2012	1	Léger	Montréal(06)	Montréal (66 )	1	0	0	0	1	0	0	0	0	0	0	0	0
SPVM _ 2012 _ 11591	SA	2012/10/27	66023				PEEL ET N-D	1			31	1	11	3	3		13		11	32		3				11	2	0	0	2	04:00:00-04:59:00	2012	2	Léger	Montréal(06)	Montréal (66 )	1	0	0	0	0	0	0	1	0	0	0	0	0
SPVM _ 2012 _ 11592	SA	2012/10/27	66023				DE MAISONNEUVE	1	AYLMER		31		11	1	3		13	1	11	32	6	1			O	12	2	0	0	1	08:00:00-08:59:00	2012	1	Léger	Montréal(06)	Montréal (66 )	2	0	0	0	0	0	0	0	0	0	0	0	0
SPVM _ 2012 _ 11593	DI	2012/10/28	66023				GUY	1	N-D	20	31		11	1	3		19		11	34		2			S	12	2	0	0	0	Non précisé	2012	0	Dommages matériels seulement	Montréal(06)	Montréal (66 )	1	0	0	0	0	0	0	0	0	0	0	0	1
SPVM _ 2012 _ 11594	VE	2012/10/26	66023	4145			BD RIDGE CRESCENT				31		11	1	2		14		11	32		2				12	2	0	0	0	16:00:00-16:59:00	2012	0	Dommages matériels inférieurs au seuil de rapportage	Montréal(06)	Montréal (66 )	2	0	0	0	0	0	0	0	0	0	0	0	0
SPVM _ 2012 _ 11595	LU	2012/10/22	66023				ST ANTOINE	1	MANSFIELD	30	31		11	1	3				11	33		3			E	11	2	0	0	0	Non précisé	2012	0	Dommages matériels inférieurs au seuil de rapportage	Montréal(06)	Montréal (66 )	0	0	0	0	0	0	1	0	0	0	0	0	1
SPVM _ 2012 _ 11596	LU	2012/10/29	66023				ST ALEXANDRE	1	DE LA GAUCHETIERE O		51		11	1	3		14		11	32		1	1			12	1	0	0	0	11:00:00-11:59:00	2012	0	Dommages matériels inférieurs au seuil de rapportage	Montréal(06)	Montréal (66 )	0	1	0	0	0	0	0	0	0	0	0	0	0
SPVM _ 2012 _ 11597	MA	2012/10/16	66023	3600			MC TAVISH				42		11	3	1		15		11			1				11	1	0	0	0	03:00:00-03:59:00	2012	0	Dommages matériels seulement	Montréal(06)	Montréal (66 )	1	0	0	0	0	0	0	0	0	0	0	0	0
SPVM _ 2012 _ 11598	LU	2012/10/29	66023				PEEL	1	SHERBROOKE		32		11	1	3		19	1	11	32	6	2				11	1	0	0	0	17:00:00-17:59:00	2012	0	Dommages matériels inférieurs au seuil de rapportage	Montréal(06)	Montréal (66 )	1	0	0	0	0	0	0	0	0	0	0	0	0
SPVM _ 2012 _ 11599	SA	2012/10/27	66023				STE CATHERINE O	1	BISHOP	10			11	3	3		13		11	32		1				11	2	0	0	0	21:00:00-21:59:00	2012	0	Dommages matériels inférieurs au seuil de rapportage	Montréal(06)	Montréal (66 )	1	0	0	0	0	0	0	0	0	0	0	0	1
SPVM _ 2012 _ 116	JE	2012/03/01	66023	4294			GRAHAM				31		16		2		29									17	2	0	0	0	Non précisé	2012	0	Dommages matériels inférieurs au seuil de rapportage	Montréal(06)	Montréal (66 )	1	0	0	0	0	0	0	0	0	0	0	0	1
SPVM _ 2012 _ 1160	VE	2012/01/13	66087				HYMUS	1	ANDRE	5	31		16	1	4		13	1	11	38	6	2			E	17	2	0	0	1	09:00:00-09:59:00	2012	1	Léger	Montréal(06)	Montréal (66 )	1	1	0	0	0	0	0	0	0	0	0	0	0
SPVM _ 2012 _ 11600	MA	2012/10/30	66023	1170			PL PHILLIPS				31		12	1	3		13		11	33		2				14	2	0	0	0	10:00:00-10:59:00	2012	0	Dommages matériels inférieurs au seuil de rapportage	Montréal(06)	Montréal (66 )	1	0	0	0	0	0	0	0	0	0	0	0	1
SPVM _ 2012 _ 11601	JE	2012/10/25	66023	3470			STANLEY				31				2		21		11								2	0	0	0	17:00:00-17:59:00	2012	0	Dommages matériels inférieurs au seuil de rapportage	Montréal(06)	Montréal (66 )	1	0	0	0	0	0	0	0	0	0	0	0	1
SPVM _ 2012 _ 11602	VE	2012/10/19	66023				METCALFE	1	SHERBROOKE	3	31		12	3	3		13		11	32		1			S	12	2	0	0	0	22:00:00-22:59:00	2012	0	Dommages matériels inférieurs au seuil de rapportage	Montréal(06)	Montréal (66 )	1	0	0	0	0	0	0	0	0	0	0	0	1
SPVM _ 2012 _ 11603	ME	2012/10/31	66023				SIMPSON	1	DOCTEUR PENFIELD		32		12	1	1		13		13	32		1				11	1	0	0	1	08:00:00-08:59:00	2012	1	Léger	Montréal(06)	Montréal (66 )	1	0	0	0	0	0	0	0	0	0	0	0	0
SPVM _ 2012 _ 11604	ME	2012/10/31	66023				SHERBROOKE O	1	DUROCHER	5	31		12	1	3		13	1	11	33	6	3			O	14	2	0	0	1	13:00:00-13:59:00	2012	1	Léger	Montréal(06)	Montréal (66 )	1	0	0	0	0	1	0	0	0	0	0	0	0
SPVM _ 2012 _ 11605	ME	2012/10/31	66023	2124			DRUMMOND				31		12	1	3		13		11	33		1				12	2	0	0	0	12:00:00-12:59:00	2012	0	Dommages matériels seulement	Montréal(06)	Montréal (66 )	1	1	0	0	0	0	0	0	0	0	0	0	0
SPVM _ 2012 _ 11606	JE	2012/11/01	66023	1030			DE LA MONTAGNE				31		11	1	3		22		11	99			2			12	2	0	0	0	10:00:00-10:59:00	2012	0	Dommages matériels inférieurs au seuil de rapportage	Montréal(06)	Montréal (66 )	1	0	0	0	0	0	0	0	1	0	0	0	0
[truncated: 216,484 more rows]
[truncated: 18 more columns]
